# Supplementary material for: A stage-resolved neuron-glia transcriptional atlas reveals a glial inflammatory pivot in epilepsy
Source: Research Square preprint supplement (doi:10.21203/rs.3.rs-8807447/v1), 2026-02-20
Supplement: Supplementary file 1 [file 218a29e4f07069cd0865505f.xlsx]

## Sheet: NK1t vs. NS1t, Top-up
GeneID	Symbol	Entrez	baseMean	log2FC	lfcSE	stat	pvalue	padj	fixedPval	fixedFDR
ENSMUSG00000020423.6	Btg2	12227	4021.05	4.35213	0.247751	17.5665	4.44678e-69	4.65711e-65	2.22045e-16	1.29193e-13
ENSMUSG00000032487.8	Ptgs2	19225	2697.03	3.14273	0.211499	14.8593	6.05838e-50	1.40999e-46	2.22045e-16	1.29193e-13
ENSMUSG00000017418.14	Arl5b	75869	605.51	1.96777	0.213013	9.2378	2.51609e-20	1.50577e-17	2.22045e-16	1.29193e-13
ENSMUSG00000026826.13	Nr4a2	18227	3065.48	4.05948	0.200319	20.2651	2.61519e-91	5.47777e-87	2.22045e-16	1.29193e-13
ENSMUSG00000074580.11	4931440P22Rik	71004	448.74	4.54446	0.311749	14.5773	3.91604e-48	7.45685e-45	2.22045e-16	1.29193e-13
ENSMUSG00000034640.9	Tiparp	99929	1579.21	3.54823	0.205855	17.2365	1.41252e-66	9.86225e-63	2.22045e-16	1.29193e-13
ENSMUSG00000028341.9	Nr4a3	18124	792.81	3.28826	0.261527	12.5733	2.96047e-36	3.26369e-33	2.22045e-16	1.29193e-13
ENSMUSG00000052684.4	Jun	16476	4750.51	1.69861	0.165971	10.2344	1.39041e-24	1.00426e-21	2.22045e-16	1.29193e-13
ENSMUSG00000028967.10	Errfi1	74155	1248.34	2.01691	0.191988	10.5054	8.15802e-26	6.10278e-23	2.22045e-16	1.29193e-13
ENSMUSG00000029062.14	Cdk11b	12537	3174.64	1.72495	0.153517	11.2362	2.70843e-29	2.26923e-26	2.22045e-16	1.29193e-13
ENSMUSG00000029135.10	Fosl2	14284	1022.19	3.00763	0.242903	12.382	3.27139e-35	3.42613e-32	2.22045e-16	1.29193e-13
ENSMUSG00000041453.12	Rpl21	19933	421.858	2.10539	0.197896	10.6389	1.96427e-26	1.52384e-23	2.22045e-16	1.29193e-13
ENSMUSG00000029641.8	Rasl11a	68895	738	3.96277	0.295816	13.3961	6.37394e-41	8.34429e-38	2.22045e-16	1.29193e-13
ENSMUSG00000071341.4	Egr4	13656	4408.59	4.29329	0.422688	10.1571	3.08026e-24	2.15064e-21	2.22045e-16	1.29193e-13
ENSMUSG00000003545.3	Fosb	14282	570.53	5.22769	0.35989	14.5258	8.31608e-48	1.45157e-44	2.22045e-16	1.29193e-13
ENSMUSG00000040435.12	Ppp1r15a	17872	784.619	2.65116	0.225497	11.7569	6.50576e-32	5.6779e-29	2.22045e-16	1.29193e-13
ENSMUSG00000049516.9	Spty2d1	101685	1271.87	3.26002	0.207863	15.6835	1.96053e-55	6.84422e-52	2.22045e-16	1.29193e-13
ENSMUSG00000052837.7	Junb	16477	8212.03	4.14584	0.427478	9.69837	3.06367e-22	1.9446e-19	2.22045e-16	1.29193e-13
ENSMUSG00000032355.16	Mlip	69642	1275.56	2.62683	0.219023	11.9934	3.84785e-33	3.6635e-30	2.22045e-16	1.29193e-13
ENSMUSG00000010067.13	Rassf1	56289	616.778	2.15886	0.159221	13.5589	7.01979e-42	1.05026e-38	2.22045e-16	1.29193e-13
ENSMUSG00000019970.15	Sgk1	20393	2879.08	1.8062	0.168448	10.7226	7.97306e-27	6.42322e-24	2.22045e-16	1.29193e-13
ENSMUSG00000065590.1	Mir212	387208	178.532	5.74148	0.485148	11.8345	2.58871e-32	2.35753e-29	2.22045e-16	1.29193e-13
ENSMUSG00000018541.10	Cwc25	67480	1203.57	2.27623	0.175043	13.0038	1.16407e-38	1.43427e-35	2.22045e-16	1.29193e-13
ENSMUSG00000035329.7	Fbxo33	70611	3022.8	2.58241	0.152811	16.8994	4.5427e-64	2.37879e-60	2.22045e-16	1.29193e-13
ENSMUSG00000021250.13	Fos	14281	2737.71	4.96068	0.506724	9.7897	1.24665e-22	8.16012e-20	2.22045e-16	1.29193e-13
ENSMUSG00000021453.2	Gadd45g	23882	2134.01	3.99214	0.401129	9.95226	2.46514e-23	1.66564e-20	2.22045e-16	1.29193e-13
ENSMUSG00000056749.7	Nfil3	18030	576.272	2.73173	0.226822	12.0435	2.09961e-33	2.09421e-30	2.22045e-16	1.29193e-13
ENSMUSG00000021701.8	Plk2	20620	11460.7	1.87644	0.122876	15.2709	1.19424e-52	3.12681e-49	2.22045e-16	1.29193e-13
ENSMUSG00000021963.17	Sap18	20220	1339.34	2.11656	0.138034	15.3336	4.55754e-53	1.36375e-49	2.22045e-16	1.29193e-13
ENSMUSG00000036422.10	Pcdh8	18530	9504.57	2.18297	0.160745	13.5803	5.24097e-42	8.44441e-39	2.22045e-16	1.29193e-13
ENSMUSG00000022602.14	Arc	11838	6679.57	3.93432	0.433112	9.08384	1.0481e-19	6.09817e-17	2.22045e-16	1.29193e-13
ENSMUSG00000023034.7	Nr4a1	15370	5920.16	4.21904	0.260071	16.2227	3.48594e-59	1.46033e-55	2.22045e-16	1.29193e-13
ENSMUSG00000022893.14	Adamts1	11504	1309.12	3.18716	0.245794	12.9668	1.88792e-38	2.19691e-35	2.22045e-16	1.29193e-13
ENSMUSG00000024190.7	Dusp1	19252	1845.82	3.81707	0.282533	13.5102	1.36136e-41	1.901e-38	2.22045e-16	1.29193e-13
ENSMUSG00000024042.7	Sik1	17691	480.438	2.34317	0.253136	9.25658	2.11077e-20	1.30036e-17	2.22045e-16	1.29193e-13
ENSMUSG00000045903.9	Npas4	225872	6588.25	6.53889	0.444769	14.7018	6.28105e-49	1.31563e-45	2.22045e-16	1.29193e-13
ENSMUSG00000038268.4	Ovca2	246257	549.854	2.00581	0.22972	8.73154	2.51217e-18	1.42216e-15	2.22045e-15	1.25701e-12
ENSMUSG00000034765.6	Dusp5	240672	607.847	2.05258	0.23642	8.68193	3.89093e-18	2.14472e-15	3.33067e-15	1.8359e-12
ENSMUSG00000019960.8	Dusp6	67603	1769.4	1.95252	0.2253	8.66629	4.46445e-18	2.39775e-15	3.77476e-15	2.02734e-12
ENSMUSG00000039221.10	Rpl22l1	68028	510.836	2.24632	0.259528	8.65542	4.911e-18	2.57165e-15	3.9968e-15	2.09293e-12
ENSMUSG00000091956.2	C2cd4b	75697	375.65	2.72293	0.314939	8.64589	5.33892e-18	2.72754e-15	4.21885e-15	2.15532e-12
ENSMUSG00000038530.11	Rgs4	19736	2872.16	1.77993	0.20626	8.62951	6.16148e-18	3.07282e-15	4.88498e-15	2.43621e-12
ENSMUSG00000038894.7	Irs2	384783	4306.25	1.61319	0.187474	8.60488	7.63993e-18	3.72153e-15	5.77316e-15	2.8122e-12
ENSMUSG00000098557.1	Kctd12	239217	1150.64	1.28799	0.150168	8.57698	9.73925e-18	4.63632e-15	7.10543e-15	3.38251e-12
ENSMUSG00000041695.2	Kcnj2	16518	473.066	2.23995	0.261851	8.55429	1.18599e-17	5.52038e-15	8.43769e-15	3.92747e-12
ENSMUSG00000032902.1	Slc16a1	20501	1142.51	1.76562	0.206896	8.53387	1.41527e-17	6.4444e-15	9.54792e-15	4.34762e-12
ENSMUSG00000032501.9	Trib1	211770	283.887	2.94458	0.347493	8.4738	2.37506e-17	1.05847e-14	1.4877e-14	6.63007e-12
ENSMUSG00000055430.4	Nap1l5	58243	5812.46	1.62348	0.193226	8.40196	4.39069e-17	1.91599e-14	2.4647e-14	1.07553e-11
ENSMUSG00000032515.8	Csrnp1	215418	361.16	1.75304	0.211813	8.27637	1.26989e-16	5.42837e-14	5.90639e-14	2.5248e-11
ENSMUSG00000015312.9	Gadd45b	17873	671.33	2.65538	0.323741	8.20218	2.36065e-16	9.88923e-14	9.85878e-14	4.13004e-11
ENSMUSG00000036432.8	Siah2	20439	587.274	1.36735	0.168305	8.12426	4.50114e-16	1.84864e-13	1.68088e-13	6.90346e-11
ENSMUSG00000038418.7	Egr1	13653	4023.48	2.70515	0.337927	8.00514	1.19332e-15	4.80679e-13	3.75922e-13	1.51424e-10
ENSMUSG00000039910.10	Cited2	17684	942.372	2.07523	0.25969	7.99118	1.33653e-15	5.28206e-13	4.12781e-13	1.63134e-10
ENSMUSG00000060126.14	Tpt1	22070	568.868	1.59931	0.201617	7.93239	2.14966e-15	8.33828e-13	6.11289e-13	2.37112e-10
ENSMUSG00000021258.10	Ccnk	12454	282.877	1.40813	0.177646	7.92663	2.25165e-15	8.5751e-13	6.35048e-13	2.41849e-10
ENSMUSG00000001964.14	Emd	13726	368.249	2.80335	0.354216	7.91424	2.48771e-15	9.30493e-13	6.89671e-13	2.57961e-10
ENSMUSG00000065537.2	Mir132	387150	197.453	5.30561	0.671045	7.90648	2.6477e-15	9.72959e-13	7.26086e-13	2.66817e-10
ENSMUSG00000031628.9	Casp3	12367	183.688	1.55251	0.198782	7.81013	5.71276e-15	2.06309e-12	1.37024e-12	4.94845e-10
ENSMUSG00000034936.2	Arl4d	80981	339.277	2.99517	0.386927	7.74092	9.8697e-15	3.50391e-12	2.15272e-12	7.64253e-10
ENSMUSG00000025981.13	Coq10b	67876	428.665	1.66983	0.218349	7.64751	2.04912e-14	7.15347e-12	3.93618e-12	1.37412e-09
ENSMUSG00000009549.14	Srp14	20813	1367.26	1.57017	0.205431	7.64329	2.11747e-14	7.27089e-12	4.04432e-12	1.38873e-09
ENSMUSG00000069273.2	H3c6	319151	33.242	4.09125	0.543059	7.53371	4.93198e-14	1.66622e-11	8.13283e-12	2.74758e-09
ENSMUSG00000022426.6	Josd1	74158	1397.79	1.03868	0.138821	7.48211	7.31385e-14	2.43168e-11	1.12625e-11	3.74453e-09
ENSMUSG00000028945.9	Rheb	19744	2889.25	1.14928	0.153762	7.47437	7.75765e-14	2.53893e-11	1.18243e-11	3.86988e-09
ENSMUSG00000087006.3	Gm13889	620695	924.899	1.72786	0.234197	7.3778	1.60923e-13	5.18568e-11	2.16089e-11	6.9634e-09
ENSMUSG00000029878.6	Dbpht2	386753	1742.13	1.31292	0.178534	7.3539	1.92502e-13	6.10931e-11	2.50575e-11	7.95234e-09
ENSMUSG00000034336.3	Ina	226180	3129.16	1.31451	0.180094	7.29903	2.89856e-13	9.06168e-11	3.51421e-11	1.09864e-08
ENSMUSG00000071265.10	1700086L19Rik	74284	293.164	1.56936	0.218223	7.19153	6.40688e-13	1.94491e-10	6.76885e-11	2.05479e-08
ENSMUSG00000071862.3	Lrrtm2	107065	2033.44	1.38262	0.192246	7.19195	6.38737e-13	1.94491e-10	6.7518e-11	2.05479e-08
ENSMUSG00000038550.10	Ciart	229599	691.896	1.46311	0.204502	7.15449	8.39823e-13	2.51299e-10	8.46574e-11	2.53319e-08
ENSMUSG00000053560.5	Ier2	15936	341.746	2.26961	0.318265	7.13121	9.94899e-13	2.93509e-10	9.73848e-11	2.87299e-08
ENSMUSG00000021877.12	Arf4	11843	2234.04	0.995569	0.139993	7.11155	1.14748e-12	3.33822e-10	1.09575e-10	3.18771e-08
ENSMUSG00000032265.14	Tent5a	212943	161.387	2.03817	0.287232	7.09591	1.28499e-12	3.68704e-10	1.2032e-10	3.45237e-08
ENSMUSG00000071076.6	Jund	16478	1051.05	1.36936	0.197267	6.94167	3.87481e-12	1.09678e-09	2.99634e-10	8.48126e-08
ENSMUSG00000026360.9	Rgs2	19735	999.147	2.02782	0.2928	6.9256	4.34128e-12	1.19648e-09	3.29157e-10	9.07175e-08
ENSMUSG00000040511.14	Pvr	52118	856.494	1.53574	0.221696	6.92725	4.29086e-12	1.19648e-09	3.25994e-10	9.07175e-08
ENSMUSG00000022010.19	Tsc22d1	21807	3722.34	1.28031	0.184952	6.92239	4.44078e-12	1.20801e-09	3.35382e-10	9.12327e-08
ENSMUSG00000054204.6	Alkal2	100294583	211.574	1.89097	0.276103	6.84877	7.4489e-12	2.00032e-09	5.14348e-10	1.38122e-07
ENSMUSG00000109901.2	Chmp1b	67064	373.78	1.62073	0.238997	6.78139	1.19023e-11	3.15578e-09	7.57789e-10	2.0092e-07
ENSMUSG00000026615.14	Eprs	107508	3564.79	0.805757	0.119179	6.76088	1.37152e-11	3.59099e-09	8.52038e-10	2.23085e-07
ENSMUSG00000003032.8	Klf4	16600	45.8494	4.89979	0.738511	6.63469	3.25191e-11	8.4092e-09	1.73982e-09	4.49905e-07
ENSMUSG00000007617.18	Homer1	26556	3812.26	1.18745	0.180306	6.58573	4.52666e-11	1.15629e-08	2.28716e-09	5.8423e-07
ENSMUSG00000037868.15	Egr2	13654	210.434	3.11832	0.475034	6.56441	5.22378e-11	1.31828e-08	2.57481e-09	6.49782e-07
ENSMUSG00000007589.9	Tinf2	28113	973.527	1.21625	0.185906	6.54229	6.05832e-11	1.51069e-08	2.91059e-09	7.25776e-07
ENSMUSG00000032641.18	Gpr19	14760	733.712	1.06138	0.162823	6.51857	7.09812e-11	1.74914e-08	3.31801e-09	8.17636e-07
ENSMUSG00000024750.11	Zfand5	22682	5212.53	0.906204	0.13922	6.50917	7.55671e-11	1.8405e-08	3.49435e-09	8.51077e-07
ENSMUSG00000101970.8	Chaserr	69170	1238.01	0.986124	0.151574	6.50589	7.72332e-11	1.85946e-08	3.55795e-09	8.56608e-07
ENSMUSG00000070284.10	Gmppb	331026	431.724	1.52099	0.234788	6.47815	9.28514e-11	2.21007e-08	4.14341e-09	9.86225e-07
ENSMUSG00000022114.5	Spry2	24064	356.025	1.9913	0.307516	6.47542	9.4546e-11	2.22512e-08	4.20586e-09	9.89842e-07
ENSMUSG00000022055.7	Nefl	18039	3240.66	1.09529	0.170604	6.42008	1.36201e-10	3.16986e-08	5.68846e-09	1.32389e-06
ENSMUSG00000041560.12	Nop53	68077	1405.56	1.39823	0.217879	6.41746	1.38565e-10	3.18942e-08	5.76998e-09	1.32811e-06
ENSMUSG00000005699.16	Pard6a	56513	638.884	1.70628	0.273381	6.24139	4.33701e-10	9.66416e-08	1.48299e-08	3.30453e-06
ENSMUSG00000042105.18	Inpp5f	101490	2240.31	0.794651	0.128051	6.20575	5.44354e-10	1.18771e-07	1.78977e-08	3.90504e-06
ENSMUSG00000031530.6	Dusp4	319520	591.182	1.76009	0.283568	6.20693	5.40293e-10	1.18771e-07	1.77871e-08	3.90504e-06
ENSMUSG00000049892.7	Rasd1	19416	754.101	1.50138	0.246773	6.08406	1.17176e-09	2.50445e-07	3.37539e-08	7.21438e-06
ENSMUSG00000062867.13	Impdh2	23918	768.359	1.23772	0.204797	6.04363	1.50683e-09	3.18809e-07	4.15644e-08	8.79402e-06
ENSMUSG00000042622.14	Maff	17133	25.3664	4.5114	0.751785	6.00092	1.96203e-09	4.10967e-07	5.17138e-08	1.0832e-05
ENSMUSG00000040466.16	Blvrb	233016	188.64	1.38861	0.238077	5.83263	5.45621e-09	1.13154e-06	1.20588e-07	2.50083e-05
ENSMUSG00000050711.7	Scg2	20254	8516.66	1.90026	0.327895	5.79533	6.8185e-09	1.4002e-06	1.45026e-07	2.97816e-05
ENSMUSG00000031381.16	Piga	18700	364.919	1.34072	0.231947	5.78029	7.45734e-09	1.50194e-06	1.56189e-07	3.14571e-05
ENSMUSG00000101122.1	Gm17971	100416214	115.991	2.2473	0.389883	5.76402	8.21331e-09	1.62298e-06	1.69189e-07	3.34324e-05
ENSMUSG00000037613.16	Tnfrsf23	79201	66.7909	2.57928	0.454057	5.68052	1.34285e-08	2.60438e-06	2.54199e-07	4.93004e-05
ENSMUSG00000048100.13	Taf13	99730	224.115	1.79266	0.316019	5.67263	1.40622e-08	2.70227e-06	2.64094e-07	5.07496e-05
ENSMUSG00000029177.9	Cenpa	12615	465.851	3.19957	0.565353	5.65943	1.51879e-08	2.89205e-06	2.81484e-07	5.35998e-05
ENSMUSG00000041132.11	N4bp2l1	100637	1340.79	0.811818	0.143547	5.65541	1.55472e-08	2.90761e-06	2.86988e-07	5.3672e-05
ENSMUSG00000046865.7	Fbl	14113	469.277	1.18128	0.208847	5.65617	1.54788e-08	2.90761e-06	2.85942e-07	5.3672e-05
ENSMUSG00000027115.14	Kif18a	228421	142.109	2.41728	0.431712	5.5993	2.15224e-08	3.98946e-06	3.75698e-07	6.96404e-05
ENSMUSG00000109865.1	Hspa14	50497	976.372	0.874994	0.156706	5.58367	2.35497e-08	4.32695e-06	4.0478e-07	7.4373e-05
ENSMUSG00000051396.15	Hspa14	50497	718.201	1.41942	0.258007	5.50149	3.76599e-08	6.85934e-06	5.97188e-07	0.000108771
ENSMUSG00000037447.16	Arid5a	214855	297.17	1.36056	0.24803	5.48546	4.12396e-08	7.44658e-06	6.43843e-07	0.000116258
ENSMUSG00000015134.15	Aldh1a3	56847	54.0156	4.58153	0.843203	5.43348	5.52648e-08	9.89381e-06	8.20553e-07	0.0001469
ENSMUSG00000065147.1	Snora31	100303751	94.2851	1.82516	0.336648	5.42158	5.90736e-08	1.04861e-05	8.67137e-07	0.000153924
ENSMUSG00000026064.16	Ptp4a1	19243	90.9177	2.20283	0.407144	5.41043	6.2872e-08	1.10665e-05	9.13085e-07	0.000160713
ENSMUSG00000025880.11	Smad7	17131	486.736	1.26692	0.234241	5.40863	6.35076e-08	1.10853e-05	9.20727e-07	0.000160713
ENSMUSG00000051855.15	Mest	17294	696.562	1.13724	0.210405	5.40503	6.47976e-08	1.12169e-05	9.36196e-07	0.000162062
ENSMUSG00000081339.1	Gm16044	100417490	88.3317	1.8266	0.340474	5.36488	8.1002e-08	1.39071e-05	1.12639e-06	0.000193388
ENSMUSG00000029378.5	Areg	11839	22.1172	5.26447	0.982354	5.35903	8.36688e-08	1.42482e-05	1.15703e-06	0.000197034
ENSMUSG00000051136.1	Ghsr	208188	91.5374	2.02584	0.379764	5.33448	9.58193e-08	1.60562e-05	1.29462e-06	0.000216937
ENSMUSG00000061104.5	Sap18b	100041953	467.63	1.47548	0.276556	5.33519	9.54442e-08	1.60562e-05	1.29042e-06	0.000216937
ENSMUSG00000035621.13	Midn	59090	179.357	1.51041	0.28395	5.31929	1.04175e-07	1.73179e-05	1.3875e-06	0.000230655
ENSMUSG00000036478.8	Btg1	12226	1230.27	0.846081	0.161518	5.23832	1.62044e-07	2.67258e-05	2.00101e-06	0.000330024
ENSMUSG00000023067.14	Cdkn1a	12575	189.005	2.17943	0.422134	5.16289	2.43171e-07	3.97926e-05	2.80134e-06	0.000458414
ENSMUSG00000026655.15	Fam107b	66540	220.419	1.11484	0.216091	5.15915	2.4808e-07	4.02812e-05	2.84814e-06	0.000462459
ENSMUSG00000028086.15	Fbxw7	50754	4468.24	0.685073	0.132899	5.15483	2.53857e-07	4.09023e-05	2.90302e-06	0.000467744
ENSMUSG00000051615.14	Rap2a	76108	1765.8	0.863259	0.168001	5.13842	2.77053e-07	4.39633e-05	3.12126e-06	0.000495288
ENSMUSG00000035851.14	Ythdc1	231386	1806.18	0.898694	0.176352	5.09601	3.4688e-07	5.4222e-05	3.76063e-06	0.000587837
ENSMUSG00000040105.3	Plpp6	74411	2113.24	0.844425	0.167144	5.05207	4.3705e-07	6.78107e-05	4.55477e-06	0.000706698
ENSMUSG00000024661.7	Fth1	14319	7734.12	1.15234	0.228996	5.03215	4.85017e-07	7.46997e-05	4.96555e-06	0.000764768
ENSMUSG00000077167.1	Gm24119	115487534	69.1726	1.77303	0.35537	4.98924	6.06176e-07	9.26785e-05	5.97414e-06	0.000913389
ENSMUSG00000028680.14	Plk3	12795	681.795	1.02335	0.207351	4.93538	7.99959e-07	0.000120546	7.51948e-06	0.00113312
ENSMUSG00000039568.6	Ubald1	207740	1948.58	0.685369	0.139011	4.93034	8.20865e-07	0.000122813	7.68211e-06	0.00114935
ENSMUSG00000031266.7	Gla	11605	261.329	1.18845	0.241825	4.9145	8.90074e-07	0.000132223	8.2156e-06	0.00122045
ENSMUSG00000049649.8	Gpr3	14748	292.627	1.17403	0.239461	4.90279	9.4485e-07	0.000139372	8.63284e-06	0.0012734
ENSMUSG00000033849.3	B3galt2	26878	1647.73	1.0224	0.20877	4.89726	9.71803e-07	0.000142345	8.83661e-06	0.00129435
ENSMUSG00000031609.3	Sap30	60406	167.736	1.59345	0.328853	4.84547	1.26312e-06	0.000183731	1.09836e-05	0.00159765
ENSMUSG00000047583.9	Tyw3	209584	246.814	0.977909	0.20323	4.81183	1.49556e-06	0.000216042	1.26359e-05	0.00182532
ENSMUSG00000051726.6	Kcnf1	382571	1533.79	1.07282	0.225931	4.74845	2.04979e-06	0.000292074	1.64136e-05	0.00233877
ENSMUSG00000026628.13	Atf3	11910	99.9501	3.81666	0.804544	4.74388	2.09664e-06	0.000296732	1.67243e-05	0.00236694
ENSMUSG00000028195.4	Ccn1	16007	297.316	1.83925	0.38819	4.73801	2.1583e-06	0.000303407	1.71314e-05	0.00240828
ENSMUSG00000037428.14	Vgf	381677	6008.3	0.96154	0.205192	4.68605	2.78532e-06	0.000386367	2.11698e-05	0.00293657
ENSMUSG00000033730.4	Egr3	13655	1476.41	1.0744	0.229897	4.67339	2.9627e-06	0.000408268	2.22828e-05	0.00307063
ENSMUSG00000000531.5	Grasp	56149	2013.28	0.689622	0.14768	4.66971	3.01623e-06	0.000412928	2.26165e-05	0.00309624
ENSMUSG00000051495.7	Irf2bp2	270110	1269.05	1.06503	0.228279	4.66546	3.07923e-06	0.000418815	2.30078e-05	0.00312937
ENSMUSG00000020893.17	Per1	18626	2492.32	1.27744	0.276378	4.62209	3.79887e-06	0.000510071	2.73897e-05	0.0036776
ENSMUSG00000023467.18	Tulp2	56734	48.907	2.24968	0.488415	4.60609	4.10316e-06	0.000547419	2.91989e-05	0.00389555
ENSMUSG00000053797.10	Krt16	16666	14.3208	6.42089	1.40266	4.57765	4.7022e-06	0.000619449	3.26964e-05	0.00430729
ENSMUSG00000031485.15	Plpbp	114863	2944.91	0.604314	0.132438	4.56298	5.04325e-06	0.000660224	3.46535e-05	0.00453657
ENSMUSG00000049907.8	Rasl11b	68939	1107.27	0.879527	0.19453	4.5213	6.14607e-06	0.000798371	4.08376e-05	0.00530059
ENSMUSG00000100210.2	H3c7	260423	21.5652	4.17568	0.923758	4.52032	6.17474e-06	0.000798371	4.09957e-05	0.00530059
ENSMUSG00000025173.13	Wdr45b	66840	1058.72	0.658391	0.145899	4.51265	6.40232e-06	0.000822718	4.22465e-05	0.0054288
ENSMUSG00000018736.14	Ndel1	83431	1612.88	0.634218	0.140628	4.5099	6.48575e-06	0.000828357	4.27031e-05	0.00545402
ENSMUSG00000027520.16	Zdbf2	73884	758.834	1.04489	0.232434	4.4954	6.94392e-06	0.000876189	4.51936e-05	0.00570256
ENSMUSG00000034083.16	Ccdc174	232236	808.312	0.819586	0.183806	4.45897	8.23549e-06	0.00103294	5.20718e-05	0.00653111
ENSMUSG00000048482.14	Bdnf	12064	2457.61	1.58948	0.358897	4.42879	9.4763e-06	0.00118149	5.85092e-05	0.00729484
ENSMUSG00000059991.7	Nptx2	53324	1884.98	1.0442	0.237287	4.40057	1.07968e-05	0.00133817	6.52058e-05	0.00808167
ENSMUSG00000061904.12	Slc25a3	18674	14539.1	0.636425	0.146461	4.34536	1.39047e-05	0.00171323	8.04558e-05	0.0099131
ENSMUSG00000040710.10	St8sia4	20452	645.595	0.937356	0.218477	4.29041	1.7834e-05	0.00213458	9.8939e-05	0.0118421
ENSMUSG00000028475.9	Spaar	71406	67.544	3.15167	0.73669	4.27815	1.88454e-05	0.00224282	0.00010358	0.0123272
ENSMUSG00000007656.13	Arpp19	59046	1564.3	0.71621	0.16769	4.27104	1.94559e-05	0.00228946	0.000106361	0.0125159
ENSMUSG00000047215.14	Rpl9	20005	376.708	0.872418	0.206014	4.23475	2.28808e-05	0.00267744	0.000121705	0.0142415
ENSMUSG00000073775.4	Kti12	100087	401.049	0.90357	0.216675	4.17017	3.04377e-05	0.00350301	0.000154287	0.0177566
ENSMUSG00000070576.4	Mn1	433938	446.36	0.966305	0.232975	4.14767	3.35878e-05	0.00384443	0.000167451	0.0191663
ENSMUSG00000081771.1	Gm15381	100417384	66.6277	2.19614	0.530821	4.13724	3.51503e-05	0.00397823	0.000173903	0.0196653
ENSMUSG00000048285.9	Frmd6	319710	980.539	0.606754	0.147415	4.11595	3.85586e-05	0.00431897	0.000187813	0.0209814
ENSMUSG00000108414.1	Snhg1	83673	629.646	0.987964	0.240248	4.11227	3.91788e-05	0.00431915	0.000190321	0.0209814
ENSMUSG00000005483.10	Dnajb1	81489	1137.45	0.819341	0.199534	4.10628	4.02078e-05	0.00440939	0.000194469	0.0213264
ENSMUSG00000031765.8	Mt1	17748	560.35	1.12046	0.273275	4.10011	4.12959e-05	0.00450513	0.000198835	0.0216917
ENSMUSG00000054648.8	Zfp869	66869	792.977	0.699217	0.171248	4.08307	4.44443e-05	0.00482347	0.000211362	0.0229388
ENSMUSG00000069045.11	Ddx3y	26900	1776.92	0.593513	0.146415	4.05364	5.04278e-05	0.00541672	0.000234772	0.0252182
ENSMUSG00000021460.17	Auh	11992	1881.73	0.557097	0.138288	4.02852	5.61296e-05	0.00599842	0.00025665	0.0274275
ENSMUSG00000020950.10	Foxg1	15228	2087.72	0.512213	0.127638	4.01302	5.99476e-05	0.00630986	0.00027109	0.028534
ENSMUSG00000048546.8	Tob2	57259	1194.16	0.816715	0.203706	4.00928	6.09036e-05	0.00637843	0.000274682	0.0287674
ENSMUSG00000008348.9	Ubc	22190	11624.6	0.67508	0.16945	3.98394	6.77808e-05	0.0070284	0.00030025	0.0311338
ENSMUSG00000024521.8	Pmaip1	58801	17.8508	4.19609	1.05713	3.96933	7.20761e-05	0.00740051	0.000315997	0.0324455
ENSMUSG00000003072.15	Atp5d	66043	2739.97	0.58821	0.14851	3.96074	7.47164e-05	0.00763419	0.000325599	0.0332683
ENSMUSG00000027381.16	Bcl2l11	12125	83.2777	1.21603	0.307139	3.95921	7.51968e-05	0.00764598	0.00032734	0.0332838
ENSMUSG00000027342.14	Pcna	18538	303.662	0.978378	0.247294	3.95634	7.61068e-05	0.0076641	0.000330632	0.0332953
ENSMUSG00000003226.7	Ranbp2	19386	4542.79	0.651867	0.164735	3.95708	7.58727e-05	0.0076641	0.000329786	0.0332953
ENSMUSG00000003031.14	Cdkn1b	12576	106.809	1.24128	0.315269	3.93721	8.24354e-05	0.00818337	0.000353354	0.0350775
ENSMUSG00000018476.7	Kdm6b	216850	740.133	0.727054	0.185168	3.92645	8.6209e-05	0.00847763	0.000366763	0.0360667
ENSMUSG00000043415.5	Otud1	71198	365.96	0.992629	0.253427	3.91683	8.97208e-05	0.00870043	0.000379153	0.0367673
ENSMUSG00000028300.14	C9orf72	73205	758.082	0.659197	0.168829	3.90451	9.44147e-05	0.0091069	0.000395589	0.038103
ENSMUSG00000053110.13	Yap1	22601	135.853	1.36504	0.350848	3.89069	9.99597e-05	0.009474	0.000414831	0.039317
ENSMUSG00000098068.1	Gm7909	666055	33.7238	2.61316	0.674724	3.87294	0.00010753	0.0101456	0.000440819	0.0415919
ENSMUSG00000044681.19	Cnpy1	269637	17.7404	6.14152	1.58717	3.86948	0.000109067	0.0101987	0.000446055	0.0417102
ENSMUSG00000038917.4	3930402G23Rik	665306	35.4555	2.72311	0.703605	3.87023	0.000108734	0.0101987	0.000444922	0.0417102
ENSMUSG00000109186.1	Gm34821	102638204	20.717	5.46551	1.41511	3.86226	0.000112344	0.0104585	0.000457182	0.0425333
ENSMUSG00000071262.10	Zfp957	105590	17.6367	5.99783	1.55338	3.86115	0.000112857	0.0104597	0.00045892	0.0425333
ENSMUSG00000022858.16	Tra2b	20462	1837.85	0.44156	0.11479	3.84668	0.000119731	0.0109995	0.000482073	0.0442873
ENSMUSG00000001627.12	Ifrd1	15982	1249.01	0.682769	0.178753	3.81962	0.00013366	0.0122255	0.000528321	0.048324
ENSMUSG00000059729.2	Olfr1385	258027	16.3965	6.06608	1.58918	3.81712	0.000135019	0.0122961	0.000532791	0.048521
ENSMUSG00000063480.8	Snu13	20826	704.632	0.719917	0.188824	3.81263	0.000137496	0.0124675	0.000540915	0.0490477

## Sheet: NK1t vs. NS1t, Top-down
GeneID	Symbol	Entrez	baseMean	log2FC	lfcSE	stat	pvalue	padj	fixedPval	fixedFDR
ENSMUSG00000021256.5	Vash1	238328	567.962	-1.42085	0.221744	-6.40761	1.47814e-10	3.36533e-08	6.08679e-09	1.3858e-06
ENSMUSG00000023249.15	Parp3	235587	138.448	-3.8504	0.603168	-6.38363	1.7294e-10	3.89506e-08	6.93091e-09	1.56102e-06
ENSMUSG00000020695.14	Mrc2	17534	98.7744	-2.10238	0.33898	-6.20207	5.57236e-10	1.20328e-07	1.82474e-08	3.94031e-06
ENSMUSG00000097745.1	AI115009	99542	738.207	-1.12716	0.194731	-5.78828	7.11106e-09	1.4461e-06	1.5016e-07	3.05364e-05
ENSMUSG00000057123.14	Gja5	14613	142.751	-1.55859	0.270075	-5.77095	7.88273e-09	1.57249e-06	1.63531e-07	3.26221e-05
ENSMUSG00000088789.1	Scarna13	100306943	138.434	-1.63586	0.284629	-5.74734	9.06602e-09	1.77474e-06	1.83609e-07	3.59427e-05
ENSMUSG00000000486.13	Septin1	54204	257.777	-1.2834	0.249432	-5.14528	2.67127e-07	4.27117e-05	3.02827e-06	0.000484199
ENSMUSG00000044702.13	Palb2	233826	143.432	-2.02336	0.396937	-5.09744	3.44285e-07	5.4221e-05	3.73729e-06	0.000587837
ENSMUSG00000049598.9	Vsig8	240916	24.7831	-3.67668	0.737992	-4.98201	6.29278e-07	9.55135e-05	6.16236e-06	0.000935339
ENSMUSG00000037805.15	Rpl10a	19896	1359.05	-0.830468	0.174828	-4.75019	2.03227e-06	0.000291561	1.6297e-05	0.00233807
ENSMUSG00000034538.8	Zfp418	232854	127.089	-1.32413	0.282144	-4.69309	2.69107e-06	0.000375781	2.05735e-05	0.00287288
ENSMUSG00000074682.4	Zcchc3	67917	614.377	-0.736218	0.158019	-4.65903	3.17696e-06	0.000429321	2.36124e-05	0.00319087
ENSMUSG00000033187.8	BC016579	212998	18.236	-6.04815	1.31924	-4.58457	4.54917e-06	0.000603081	3.18105e-05	0.00421711
ENSMUSG00000097279.1	Gm5106	330031	9.30654	-6.53639	1.45118	-4.50419	6.66281e-06	0.000845814	4.3669e-05	0.00554358
ENSMUSG00000012429.9	Mplkip	66308	1264.41	-0.862815	0.198837	-4.33932	1.42927e-05	0.00175073	8.23166e-05	0.0100831
ENSMUSG00000027901.12	Dennd2d	72121	28.4376	-3.47792	0.809083	-4.2986	1.71883e-05	0.00208108	9.59529e-05	0.0116175
ENSMUSG00000066042.4	Med18	67219	192.519	-0.802143	0.186558	-4.2997	1.71032e-05	0.00208108	9.55579e-05	0.0116175
ENSMUSG00000033313.11	Fbxl8	50788	111.992	-1.31296	0.305918	-4.29186	1.77183e-05	0.00213292	9.84053e-05	0.0118421
ENSMUSG00000097404.2	Gm10814	100502985	115.949	-1.55912	0.364959	-4.27204	1.93694e-05	0.00228946	0.000105968	0.0125159
ENSMUSG00000030330.15	Ing4	28019	550.065	-0.677652	0.160129	-4.23192	2.31706e-05	0.00269629	0.000122984	0.0143113
ENSMUSG00000064272.3	Gpbar1	227289	20.8227	-6.16067	1.46208	-4.21364	2.51288e-05	0.002908	0.000131564	0.015225
ENSMUSG00000031563.8	Wwc2	52357	1057.46	-0.717031	0.173066	-4.14311	3.42632e-05	0.00390042	0.000170246	0.0193803
ENSMUSG00000113722.1	Snhg10	69434	283.107	-1.42463	0.344439	-4.13609	3.53266e-05	0.00397823	0.000174628	0.0196653
ENSMUSG00000072494.7	Ppp1r3e	105651	75.58	-1.15837	0.281608	-4.11342	3.89847e-05	0.00431915	0.000189537	0.0209814
ENSMUSG00000022554.7	Hgh1	59053	986.827	-0.710408	0.172664	-4.11438	3.88214e-05	0.00431915	0.000188876	0.0209814
ENSMUSG00000092125.1	AA543401	100417434	19.1972	-4.29881	1.05775	-4.06412	4.82134e-05	0.00520555	0.000226166	0.0244189
ENSMUSG00000089889.2	0610040B10Rik	67672	238.536	-0.975068	0.242194	-4.02598	5.67376e-05	0.00603262	0.00025896	0.0275339
ENSMUSG00000038256.15	Bcl9	77578	1307.89	-0.673347	0.167619	-4.01713	5.89105e-05	0.00623201	0.000267184	0.0282648
ENSMUSG00000022510.14	Trp63	22061	105.068	-1.82787	0.457778	-3.99291	6.52661e-05	0.00680131	0.000290953	0.0303199
ENSMUSG00000051817.8	Sox12	20667	2160.07	-0.519577	0.130572	-3.97922	6.91411e-05	0.00713413	0.000305254	0.0314968
ENSMUSG00000022820.4	Ndufb4	68194	246.267	-0.851527	0.215961	-3.94297	8.04775e-05	0.00806547	0.000346357	0.0347119
ENSMUSG00000005628.12	Tmod4	50874	56.9651	-2.44235	0.619918	-3.93979	8.15534e-05	0.00813437	0.000350205	0.0349305
ENSMUSG00000021228.15	Acot3	171281	386.678	-0.94598	0.24061	-3.93158	8.43886e-05	0.00833775	0.000360306	0.0355989
ENSMUSG00000050973.11	Gdpgp1	269952	378.878	-1.17952	0.300788	-3.92143	8.80256e-05	0.00861582	0.000373182	0.0365265
ENSMUSG00000033356.3	Pus7l	78895	125.665	-1.15064	0.293769	-3.91683	8.97198e-05	0.00870043	0.00037915	0.0367673
ENSMUSG00000051652.4	Lrrc3	237387	112.872	-1.43153	0.366737	-3.90342	9.48425e-05	0.0091069	0.000397081	0.038103
ENSMUSG00000062683.11	Atp5g2	67942	162.948	-0.860703	0.220553	-3.90247	9.52168e-05	0.0091069	0.000398384	0.038103
ENSMUSG00000054723.6	Vmac	106639	354.649	-0.885452	0.227397	-3.89387	9.86589e-05	0.00939323	0.000410334	0.0390675
ENSMUSG00000047025.5	Ccer1	66716	18.8641	-4.27328	1.10928	-3.85231	0.000117009	0.0107968	0.000472933	0.043639

## Sheet: NK1t vs. NS1t, GO-up
ID	Term	Ont	N	Up	P.Up	Genes.Up
GO:0043226	organelle	CC	12533	147	2.90251e-25	Adamts1, Gla, Arc, Areg, Arf4, Atf3, Auh, Bdnf, Bcl2l11, Btg1, Btg2, Casp3, Ccnk, Cdk11b, Cdkn1a, Cdkn1b, Cenpa, Plk3, Egr1, Egr2, Egr3, Egr4, Emd, Fbl, Fos, Fosb, Fosl2, Fth1, Gpr19, Foxg1, Nr4a1, Ier2, Ifrd1, Jun, Junb, Jund, Kcnj2, Klf4, Krt16, Smad7, Maff, Mest, Cited2, Sik1, Mt1, Ppp1r15a, Gadd45b, Nfil3, Nefl, Nr4a3, Nr4a2, Pcna, Per1, Slc25a3, Piga, Ptgs2, Ptp4a1, Dusp1, Ranbp2, Rasd1, Rgs…
GO:0005622	intracellular	CC	13918	153	5.87542e-24	Adamts1, Gla, Arc, Areg, Arf4, Atf3, Auh, Bdnf, Bcl2l11, Btg1, Btg2, Casp3, Ccnk, Cdk11b, Cdkn1a, Cdkn1b, Cenpa, Plk3, Egr1, Egr2, Egr3, Egr4, Emd, Fbl, Fos, Fosb, Fosl2, Fth1, Gpr3, Foxg1, Nr4a1, Ier2, Ifrd1, Jun, Junb, Jund, Kcnj2, Klf4, Krt16, Smad7, Maff, Mest, Cited2, Sik1, Mt1, Ppp1r15a, Gadd45b, Nfil3, Nefl, Nr4a3, Nr4a2, Pcna, Per1, Slc25a3, Piga, Ptgs2, Ptp4a1, Dusp1, Ranbp2, Rasd1, Rgs2…
GO:0009987	cellular process	BP	16616	166	2.21639e-23	Adamts1, Gla, Arc, Areg, Arf4, Atf3, Auh, Bdnf, Bcl2l11, Btg1, Btg2, Casp3, Ccnk, Cdk11b, Cdkn1a, Cdkn1b, Cenpa, Plk3, Egr1, Egr2, Egr3, Egr4, Emd, Fbl, Fos, Fosb, Fosl2, Fth1, Gpr3, Gpr19, Foxg1, Nr4a1, Ier2, Ifrd1, Ccn1, Jun, Junb, Jund, Kcnj2, Klf4, Krt16, Smad7, Maff, Cited2, Sik1, Mt1, Ppp1r15a, Gadd45b, Nfil3, Nefl, Nr4a3, Nr4a2, Pcdh8, Pcna, Per1, Slc25a3, Piga, Ptgs2, Ptp4a1, Dusp1, Ranbp…
GO:0043229	intracellular organelle	CC	12185	142	2.85508e-23	Adamts1, Gla, Arc, Areg, Arf4, Atf3, Auh, Bdnf, Bcl2l11, Btg1, Btg2, Casp3, Ccnk, Cdk11b, Cdkn1a, Cdkn1b, Cenpa, Plk3, Egr1, Egr2, Egr3, Egr4, Emd, Fbl, Fos, Fosb, Fosl2, Fth1, Foxg1, Nr4a1, Ier2, Ifrd1, Jun, Junb, Jund, Kcnj2, Klf4, Krt16, Smad7, Maff, Mest, Cited2, Sik1, Mt1, Ppp1r15a, Gadd45b, Nfil3, Nefl, Nr4a3, Nr4a2, Pcna, Per1, Slc25a3, Piga, Ptgs2, Ptp4a1, Dusp1, Ranbp2, Rasd1, Rgs2, Rgs4…
GO:0005634	nucleus	CC	7023	106	4.10218e-23	Areg, Atf3, Bdnf, Btg1, Btg2, Casp3, Ccnk, Cdk11b, Cdkn1a, Cdkn1b, Cenpa, Plk3, Egr1, Egr2, Egr3, Egr4, Emd, Fbl, Fos, Fosb, Fosl2, Foxg1, Nr4a1, Ier2, Ifrd1, Jun, Junb, Jund, Klf4, Smad7, Maff, Cited2, Sik1, Mt1, Gadd45b, Nfil3, Nr4a3, Nr4a2, Pcna, Per1, Ptgs2, Ptp4a1, Dusp1, Ranbp2, Rasd1, Rgs2, Rgs4, Rheb, Sap18, Sgk1, Siah2, Tra2b, Plk2, Srp14, Snu13, Tsc22d1, Tpt1, Ubc, Yap1, Gadd45g, Impdh2…
GO:0043231	intracellular membrane-bounded organelle	CC	10522	131	6.1737e-23	Gla, Areg, Arf4, Atf3, Auh, Bdnf, Bcl2l11, Btg1, Btg2, Casp3, Ccnk, Cdk11b, Cdkn1a, Cdkn1b, Cenpa, Plk3, Egr1, Egr2, Egr3, Egr4, Emd, Fbl, Fos, Fosb, Fosl2, Fth1, Foxg1, Nr4a1, Ier2, Ifrd1, Jun, Junb, Jund, Kcnj2, Klf4, Smad7, Maff, Mest, Cited2, Sik1, Mt1, Ppp1r15a, Gadd45b, Nfil3, Nr4a3, Nr4a2, Pcna, Per1, Slc25a3, Piga, Ptgs2, Ptp4a1, Dusp1, Ranbp2, Rasd1, Rgs2, Rgs4, Rheb, Rpl21, Sap18, Sgk1,…
GO:0043227	membrane-bounded organelle	CC	11284	135	2.37841e-22	Adamts1, Gla, Arc, Areg, Arf4, Atf3, Auh, Bdnf, Bcl2l11, Btg1, Btg2, Casp3, Ccnk, Cdk11b, Cdkn1a, Cdkn1b, Cenpa, Plk3, Egr1, Egr2, Egr3, Egr4, Emd, Fbl, Fos, Fosb, Fosl2, Fth1, Foxg1, Nr4a1, Ier2, Ifrd1, Jun, Junb, Jund, Kcnj2, Klf4, Smad7, Maff, Mest, Cited2, Sik1, Mt1, Ppp1r15a, Gadd45b, Nfil3, Nr4a3, Nr4a2, Pcna, Per1, Slc25a3, Piga, Ptgs2, Ptp4a1, Dusp1, Ranbp2, Rasd1, Rgs2, Rgs4, Rheb, Rpl21…
GO:0008152	metabolic process	BP	10809	130	3.87015e-21	Adamts1, Gla, Arc, Areg, Arf4, Atf3, Auh, Bdnf, Bcl2l11, Btg1, Btg2, Casp3, Ccnk, Cdk11b, Cdkn1a, Cdkn1b, Plk3, Egr1, Egr2, Egr3, Egr4, Fbl, Fos, Fosb, Fosl2, Fth1, Gpr3, Foxg1, Nr4a1, Ier2, Ifrd1, Ccn1, Jun, Junb, Jund, Klf4, Smad7, Maff, Cited2, Sik1, Ppp1r15a, Gadd45b, Nfil3, Nr4a3, Nr4a2, Pcna, Per1, Piga, Ptgs2, Ptp4a1, Dusp1, Ranbp2, Rasd1, Rgs2, Rheb, Rpl21, Rpl9, Sap18, Scg2, Sgk1, Siah2,…
GO:0031323	regulation of cellular metabolic process	BP	5853	93	5.42802e-21	Gla, Arc, Areg, Arf4, Atf3, Bdnf, Bcl2l11, Btg2, Casp3, Ccnk, Cdk11b, Cdkn1a, Cdkn1b, Plk3, Egr1, Egr2, Egr3, Egr4, Fos, Fosb, Fosl2, Foxg1, Nr4a1, Ier2, Ifrd1, Ccn1, Jun, Junb, Jund, Klf4, Smad7, Maff, Cited2, Sik1, Ppp1r15a, Gadd45b, Nfil3, Nr4a3, Nr4a2, Pcna, Per1, Ptgs2, Dusp1, Ranbp2, Rasd1, Rgs2, Sap18, Siah2, Tra2b, Plk2, Tsc22d1, Yap1, Gadd45g, Spry2, Tinf2, Fbxw7, Rassf1, Pard6a, Pmaip1,…
GO:0044260	cellular macromolecule metabolic process	BP	7460	106	5.61329e-21	Arc, Areg, Arf4, Atf3, Bdnf, Bcl2l11, Btg1, Btg2, Casp3, Ccnk, Cdk11b, Cdkn1a, Cdkn1b, Plk3, Egr1, Egr2, Egr3, Egr4, Fbl, Fos, Fosb, Fosl2, Foxg1, Nr4a1, Ier2, Ifrd1, Ccn1, Jun, Junb, Jund, Klf4, Smad7, Maff, Cited2, Sik1, Ppp1r15a, Gadd45b, Nfil3, Nr4a3, Nr4a2, Pcna, Per1, Piga, Ptgs2, Dusp1, Ranbp2, Rasd1, Rgs2, Rpl21, Rpl9, Sap18, Scg2, Sgk1, Siah2, St8sia4, Plk2, Tsc22d1, Ubc, Yap1, Gadd45g, …
GO:0080090	regulation of primary metabolic process	BP	5645	91	7.40008e-21	Areg, Arf4, Atf3, Bdnf, Bcl2l11, Btg2, Casp3, Ccnk, Cdk11b, Cdkn1a, Cdkn1b, Plk3, Egr1, Egr2, Egr3, Egr4, Fos, Fosb, Fosl2, Foxg1, Nr4a1, Ier2, Ifrd1, Ccn1, Jun, Junb, Jund, Klf4, Smad7, Maff, Cited2, Sik1, Ppp1r15a, Gadd45b, Nfil3, Nr4a3, Nr4a2, Pcna, Per1, Ptgs2, Dusp1, Ranbp2, Rasd1, Rgs2, Sap18, Siah2, Tra2b, Plk2, Tsc22d1, Yap1, Gadd45g, Spry2, Tinf2, Fbxw7, Rassf1, Pard6a, Pmaip1, Arpp19, M…
GO:0008150	biological_process	BP	20950	181	7.8658e-21	Adamts1, Gla, Arc, Areg, Arf4, Atf3, Auh, Bdnf, Bcl2l11, Btg1, Btg2, Casp3, Ccnk, Cdk11b, Cdkn1a, Cdkn1b, Cenpa, Plk3, Egr1, Egr2, Egr3, Egr4, Emd, Fbl, Fos, Fosb, Fosl2, Fth1, Gpr3, Gpr19, Foxg1, Nr4a1, Ier2, Ifrd1, Ccn1, Jun, Junb, Jund, Kcnj2, Klf4, Krt16, Smad7, Maff, Mest, Cited2, Sik1, Mt1, Ppp1r15a, Gadd45b, Nfil3, Nefl, Nr4a3, Nr4a2, Pcdh8, Pcna, Per1, Slc25a3, Piga, Ptgs2, Ptp4a1, Dusp1,…
GO:0044237	cellular metabolic process	BP	9722	122	1.06595e-20	Gla, Arc, Areg, Arf4, Atf3, Auh, Bdnf, Bcl2l11, Btg1, Btg2, Casp3, Ccnk, Cdk11b, Cdkn1a, Cdkn1b, Plk3, Egr1, Egr2, Egr3, Egr4, Fbl, Fos, Fosb, Fosl2, Foxg1, Nr4a1, Ier2, Ifrd1, Ccn1, Jun, Junb, Jund, Klf4, Smad7, Maff, Cited2, Sik1, Ppp1r15a, Gadd45b, Nfil3, Nr4a3, Nr4a2, Pcna, Per1, Piga, Ptgs2, Ptp4a1, Dusp1, Ranbp2, Rasd1, Rgs2, Rpl21, Rpl9, Sap18, Scg2, Sgk1, Siah2, St8sia4, Tra2b, Plk2, Snu1…
GO:0048523	negative regulation of cellular process	BP	4888	84	1.12189e-20	Gla, Arc, Areg, Arf4, Atf3, Bdnf, Btg1, Btg2, Casp3, Ccnk, Cdk11b, Cdkn1a, Cdkn1b, Plk3, Egr1, Egr3, Emd, Fth1, Foxg1, Nr4a1, Ifrd1, Ccn1, Jun, Klf4, Krt16, Smad7, Cited2, Sik1, Mt1, Ppp1r15a, Gadd45b, Nfil3, Nefl, Nr4a3, Nr4a2, Pcna, Per1, Ptgs2, Dusp1, Rasd1, Rgs2, Rgs4, Scg2, Sgk1, Siah2, Tra2b, Plk2, Tsc22d1, Tpt1, Yap1, Gadd45g, Spry2, Tinf2, Fbxw7, Rassf1, Pard6a, Tob2, Pmaip1, Arpp19, Midn…
GO:0048519	negative regulation of biological process	BP	5395	88	2.41328e-20	Adamts1, Gla, Arc, Areg, Arf4, Atf3, Bdnf, Btg1, Btg2, Casp3, Ccnk, Cdk11b, Cdkn1a, Cdkn1b, Plk3, Egr1, Egr3, Emd, Fth1, Foxg1, Nr4a1, Ifrd1, Ccn1, Jun, Klf4, Krt16, Smad7, Cited2, Sik1, Mt1, Ppp1r15a, Gadd45b, Nfil3, Nefl, Nr4a3, Nr4a2, Pcna, Per1, Ptgs2, Dusp1, Rasd1, Rgs2, Rgs4, Rheb, Scg2, Sgk1, Siah2, Tra2b, Plk2, Tsc22d1, Tpt1, Yap1, Gadd45g, Spry2, Tinf2, Fbxw7, Rassf1, Pard6a, Tob2, Pmaip…
GO:0019222	regulation of metabolic process	BP	6583	98	2.44747e-20	Gla, Arc, Areg, Arf4, Atf3, Bdnf, Bcl2l11, Btg2, Casp3, Ccnk, Cdk11b, Cdkn1a, Cdkn1b, Plk3, Egr1, Egr2, Egr3, Egr4, Fos, Fosb, Fosl2, Gpr3, Foxg1, Nr4a1, Ier2, Ifrd1, Ccn1, Jun, Junb, Jund, Klf4, Smad7, Maff, Cited2, Sik1, Ppp1r15a, Gadd45b, Nfil3, Nr4a3, Nr4a2, Pcna, Per1, Ptgs2, Dusp1, Ranbp2, Rasd1, Rgs2, Rheb, Sap18, Siah2, Tra2b, Plk2, Tsc22d1, Yap1, Gadd45g, Spry2, Tinf2, Fbxw7, Rassf1, Par…
GO:0005488	binding	MF	13479	145	2.6627e-20	Adamts1, Gla, Arc, Areg, Arf4, Atf3, Auh, Bdnf, Bcl2l11, Btg1, Btg2, Casp3, Ccnk, Cdk11b, Cdkn1a, Cdkn1b, Cenpa, Plk3, Egr1, Egr2, Egr3, Egr4, Emd, Fbl, Fos, Fosb, Fosl2, Fth1, Foxg1, Nr4a1, Ier2, Ifrd1, Ccn1, Jun, Junb, Jund, Kcnj2, Klf4, Krt16, Smad7, Maff, Cited2, Sik1, Mt1, Ppp1r15a, Gadd45b, Nfil3, Nefl, Nr4a3, Nr4a2, Pcdh8, Pcna, Per1, Slc25a3, Ptgs2, Dusp1, Ranbp2, Rasd1, Rgs2, Rgs4, Rheb,…
GO:0050794	regulation of cellular process	BP	11349	132	3.02181e-20	Adamts1, Gla, Arc, Areg, Arf4, Atf3, Bdnf, Bcl2l11, Btg1, Btg2, Casp3, Ccnk, Cdk11b, Cdkn1a, Cdkn1b, Plk3, Egr1, Egr2, Egr3, Egr4, Emd, Fos, Fosb, Fosl2, Fth1, Gpr3, Gpr19, Foxg1, Nr4a1, Ier2, Ifrd1, Ccn1, Jun, Junb, Jund, Kcnj2, Klf4, Krt16, Smad7, Maff, Cited2, Sik1, Mt1, Ppp1r15a, Gadd45b, Nfil3, Nefl, Nr4a3, Nr4a2, Pcdh8, Pcna, Per1, Ptgs2, Ptp4a1, Dusp1, Ranbp2, Rasd1, Rgs2, Rgs4, Rheb, Sap1…
GO:0051171	regulation of nitrogen compound metabolic process	BP	5481	88	7.00013e-20	Gla, Areg, Arf4, Atf3, Bdnf, Bcl2l11, Btg2, Casp3, Ccnk, Cdk11b, Cdkn1a, Cdkn1b, Plk3, Egr1, Egr2, Egr3, Egr4, Fos, Fosb, Fosl2, Foxg1, Nr4a1, Ier2, Ifrd1, Ccn1, Jun, Junb, Jund, Klf4, Smad7, Maff, Cited2, Sik1, Ppp1r15a, Gadd45b, Nfil3, Nr4a3, Nr4a2, Pcna, Per1, Ptgs2, Dusp1, Rasd1, Rgs2, Sap18, Siah2, Tra2b, Plk2, Tsc22d1, Yap1, Gadd45g, Spry2, Tinf2, Fbxw7, Rassf1, Pard6a, Pmaip1, Arpp19, Sap3…
GO:0060255	regulation of macromolecule metabolic process	BP	6102	93	1.04036e-19	Arc, Areg, Arf4, Atf3, Bdnf, Bcl2l11, Btg2, Casp3, Ccnk, Cdk11b, Cdkn1a, Cdkn1b, Plk3, Egr1, Egr2, Egr3, Egr4, Fos, Fosb, Fosl2, Foxg1, Nr4a1, Ier2, Ifrd1, Ccn1, Jun, Junb, Jund, Klf4, Smad7, Maff, Cited2, Sik1, Ppp1r15a, Gadd45b, Nfil3, Nr4a3, Nr4a2, Pcna, Per1, Ptgs2, Dusp1, Rasd1, Rgs2, Sap18, Siah2, Tra2b, Plk2, Tsc22d1, Yap1, Gadd45g, Spry2, Tinf2, Fbxw7, Rassf1, Pard6a, Tob2, Pmaip1, Arpp19…
GO:0043170	macromolecule metabolic process	BP	8833	114	1.15729e-19	Adamts1, Arc, Areg, Arf4, Atf3, Bdnf, Bcl2l11, Btg1, Btg2, Casp3, Ccnk, Cdk11b, Cdkn1a, Cdkn1b, Plk3, Egr1, Egr2, Egr3, Egr4, Fbl, Fos, Fosb, Fosl2, Foxg1, Nr4a1, Ier2, Ifrd1, Ccn1, Jun, Junb, Jund, Klf4, Smad7, Maff, Cited2, Sik1, Ppp1r15a, Gadd45b, Nfil3, Nr4a3, Nr4a2, Pcna, Per1, Piga, Ptgs2, Dusp1, Ranbp2, Rasd1, Rgs2, Rpl21, Rpl9, Sap18, Scg2, Sgk1, Siah2, St8sia4, Tra2b, Plk2, Snu13, Tsc22d…
GO:0071704	organic substance metabolic process	BP	10294	124	1.36704e-19	Adamts1, Gla, Arc, Areg, Arf4, Atf3, Auh, Bdnf, Bcl2l11, Btg1, Btg2, Casp3, Ccnk, Cdk11b, Cdkn1a, Cdkn1b, Plk3, Egr1, Egr2, Egr3, Egr4, Fbl, Fos, Fosb, Fosl2, Foxg1, Nr4a1, Ier2, Ifrd1, Ccn1, Jun, Junb, Jund, Klf4, Smad7, Maff, Cited2, Sik1, Ppp1r15a, Gadd45b, Nfil3, Nr4a3, Nr4a2, Pcna, Per1, Piga, Ptgs2, Dusp1, Ranbp2, Rasd1, Rgs2, Rpl21, Rpl9, Sap18, Scg2, Sgk1, Siah2, St8sia4, Tra2b, Slc16a1, …
GO:0044238	primary metabolic process	BP	9560	118	5.1474e-19	Adamts1, Gla, Areg, Arf4, Atf3, Auh, Bdnf, Bcl2l11, Btg1, Btg2, Casp3, Ccnk, Cdk11b, Cdkn1a, Cdkn1b, Plk3, Egr1, Egr2, Egr3, Egr4, Fbl, Fos, Fosb, Fosl2, Foxg1, Nr4a1, Ier2, Ifrd1, Ccn1, Jun, Junb, Jund, Klf4, Smad7, Maff, Cited2, Sik1, Ppp1r15a, Gadd45b, Nfil3, Nr4a3, Nr4a2, Pcna, Per1, Piga, Ptgs2, Dusp1, Ranbp2, Rasd1, Rgs2, Rpl21, Rpl9, Sap18, Scg2, Sgk1, Siah2, St8sia4, Tra2b, Slc16a1, Plk2,…
GO:0050789	regulation of biological process	BP	11880	133	7.25425e-19	Adamts1, Gla, Arc, Areg, Arf4, Atf3, Bdnf, Bcl2l11, Btg1, Btg2, Casp3, Ccnk, Cdk11b, Cdkn1a, Cdkn1b, Plk3, Egr1, Egr2, Egr3, Egr4, Emd, Fos, Fosb, Fosl2, Fth1, Gpr3, Gpr19, Foxg1, Nr4a1, Ier2, Ifrd1, Ccn1, Jun, Junb, Jund, Kcnj2, Klf4, Krt16, Smad7, Maff, Mest, Cited2, Sik1, Mt1, Ppp1r15a, Gadd45b, Nfil3, Nefl, Nr4a3, Nr4a2, Pcdh8, Pcna, Per1, Ptgs2, Ptp4a1, Dusp1, Ranbp2, Rasd1, Rgs2, Rgs4, Rheb…
GO:0005575	cellular_component	CC	21078	179	1.25746e-18	Adamts1, Gla, Arc, Areg, Arf4, Atf3, Auh, Bdnf, Bcl2l11, Btg1, Btg2, Casp3, Ccnk, Cdk11b, Cdkn1a, Cdkn1b, Cenpa, Plk3, Egr1, Egr2, Egr3, Egr4, Emd, Fbl, Fos, Fosb, Fosl2, Fth1, Gpr3, Gpr19, Foxg1, Nr4a1, Ier2, Ifrd1, Ccn1, Jun, Junb, Jund, Kcnj2, Klf4, Krt16, Smad7, Maff, Mest, Cited2, Sik1, Mt1, Ppp1r15a, Gadd45b, Nfil3, Nefl, Nr4a3, Nr4a2, Pcdh8, Pcna, Per1, Slc25a3, Piga, Ptgs2, Ptp4a1, Dusp1,…
GO:0006807	nitrogen compound metabolic process	BP	8999	113	2.04669e-18	Adamts1, Gla, Areg, Arf4, Atf3, Auh, Bdnf, Bcl2l11, Btg1, Btg2, Casp3, Ccnk, Cdk11b, Cdkn1a, Cdkn1b, Plk3, Egr1, Egr2, Egr3, Egr4, Fbl, Fos, Fosb, Fosl2, Foxg1, Nr4a1, Ier2, Ifrd1, Ccn1, Jun, Junb, Jund, Klf4, Smad7, Maff, Cited2, Sik1, Ppp1r15a, Gadd45b, Nfil3, Nr4a3, Nr4a2, Pcna, Per1, Piga, Ptgs2, Dusp1, Ranbp2, Rasd1, Rgs2, Rpl21, Rpl9, Sap18, Scg2, Sgk1, Siah2, St8sia4, Tra2b, Plk2, Snu13, T…
GO:0007275	multicellular organism development	BP	5345	84	3.44634e-18	Adamts1, Arc, Areg, Arf4, Atf3, Bdnf, Bcl2l11, Btg1, Btg2, Casp3, Ccnk, Cdk11b, Cdkn1a, Cdkn1b, Egr1, Egr2, Egr3, Emd, Fos, Fosl2, Foxg1, Nr4a1, Ier2, Ifrd1, Ccn1, Jun, Junb, Klf4, Krt16, Smad7, Maff, Cited2, Sik1, Gadd45b, Nefl, Nr4a3, Nr4a2, Pcdh8, Ptgs2, Ptp4a1, Dusp1, Rgs2, Rgs4, Rheb, Scg2, Sgk1, Siah2, Tra2b, Plk2, Yap1, Zfand5, Gadd45g, Spry2, Homer1, Fbxw7, Aldh1a3, Tob2, Sap30, Dusp6, Sp…
GO:0048856	anatomical structure development	BP	5826	87	1.50513e-17	Adamts1, Arc, Areg, Arf4, Atf3, Bdnf, Bcl2l11, Btg1, Btg2, Casp3, Ccnk, Cdk11b, Cdkn1a, Cdkn1b, Egr1, Egr2, Egr3, Emd, Fos, Fosl2, Foxg1, Nr4a1, Ier2, Ifrd1, Ccn1, Jun, Junb, Jund, Klf4, Krt16, Smad7, Maff, Cited2, Sik1, Gadd45b, Nefl, Nr4a3, Nr4a2, Pcdh8, Ptgs2, Ptp4a1, Dusp1, Rgs2, Rgs4, Rheb, Scg2, Sgk1, Siah2, Tra2b, Plk2, Tpt1, Yap1, Zfand5, Gadd45g, Spry2, Homer1, Fbxw7, Aldh1a3, Tob2, Sap3…
GO:0005515	protein binding	MF	9159	112	3.05678e-17	Adamts1, Gla, Arc, Areg, Arf4, Atf3, Bdnf, Bcl2l11, Btg1, Btg2, Casp3, Ccnk, Cdkn1a, Cdkn1b, Cenpa, Plk3, Egr1, Egr2, Emd, Fbl, Fos, Foxg1, Nr4a1, Ifrd1, Ccn1, Jun, Junb, Jund, Kcnj2, Klf4, Krt16, Smad7, Cited2, Sik1, Ppp1r15a, Gadd45b, Nfil3, Nefl, Nr4a3, Nr4a2, Pcna, Per1, Ptgs2, Dusp1, Ranbp2, Rasd1, Rgs2, Rgs4, Rheb, Rpl21, Sap18, Scg2, Sgk1, Siah2, Tra2b, Slc16a1, Plk2, Snu13, Tsc22d1, Tpt1,…
GO:0009888	tissue development	BP	1934	48	3.65725e-17	Arc, Areg, Atf3, Bdnf, Btg1, Btg2, Casp3, Cdkn1a, Cdkn1b, Egr1, Egr2, Emd, Fos, Fosl2, Nr4a1, Ifrd1, Ccn1, Jun, Junb, Klf4, Krt16, Smad7, Maff, Cited2, Sik1, Nr4a3, Pcdh8, Ptgs2, Dusp1, Rgs2, Rgs4, Rheb, Tpt1, Yap1, Zfand5, Spry2, Homer1, Aldh1a3, Sap30, Spaar, Errfi1, Tiparp, Ghsr, Arid5a, Kdm6b, Dusp5, Dusp4, Frmd6
GO:0031325	positive regulation of cellular metabolic process	BP	3288	63	3.86344e-17	Areg, Arf4, Atf3, Bdnf, Bcl2l11, Btg2, Casp3, Ccnk, Cdkn1a, Cdkn1b, Plk3, Egr1, Egr2, Egr3, Egr4, Fos, Fosb, Fosl2, Nr4a1, Ier2, Ifrd1, Ccn1, Jun, Junb, Jund, Klf4, Smad7, Maff, Cited2, Ppp1r15a, Gadd45b, Nfil3, Nr4a3, Nr4a2, Pcna, Per1, Ptgs2, Ranbp2, Tra2b, Plk2, Tsc22d1, Yap1, Gadd45g, Spry2, Fbxw7, Rassf1, Pmaip1, Arpp19, Nop53, Rasl11a, C9orf72, Rap2a, Tnfrsf23, Inpp5f, Zfp957, Ghsr, Trib1, …
GO:0048518	positive regulation of biological process	BP	6183	89	5.21903e-17	Adamts1, Arc, Areg, Arf4, Atf3, Bdnf, Bcl2l11, Btg1, Btg2, Casp3, Ccnk, Cdkn1a, Cdkn1b, Plk3, Egr1, Egr2, Egr3, Egr4, Emd, Fos, Fosb, Fosl2, Gpr3, Foxg1, Nr4a1, Ier2, Ifrd1, Ccn1, Jun, Junb, Jund, Kcnj2, Klf4, Smad7, Maff, Cited2, Ppp1r15a, Gadd45b, Nfil3, Nefl, Nr4a3, Nr4a2, Pcna, Per1, Ptgs2, Ptp4a1, Dusp1, Ranbp2, Rgs2, Rgs4, Rheb, Scg2, Sgk1, Tra2b, Plk2, Tsc22d1, Yap1, Gadd45g, Spry2, Homer1…
GO:0042981	regulation of apoptotic process	BP	1495	42	7.00846e-17	Arf4, Atf3, Bdnf, Bcl2l11, Btg1, Btg2, Casp3, Cdk11b, Cdkn1a, Cdkn1b, Plk3, Egr1, Egr3, Nr4a1, Ccn1, Jun, Klf4, Cited2, Mt1, Gadd45b, Nefl, Nr4a3, Nr4a2, Ptgs2, Dusp1, Scg2, Sgk1, Siah2, Plk2, Tsc22d1, Tpt1, Yap1, Gadd45g, Spry2, Fbxw7, Aldh1a3, Pmaip1, Dusp6, Nop53, Tnfrsf23, Ghsr, Irs2
GO:0065007	biological regulation	BP	12465	133	7.77333e-17	Adamts1, Gla, Arc, Areg, Arf4, Atf3, Bdnf, Bcl2l11, Btg1, Btg2, Casp3, Ccnk, Cdk11b, Cdkn1a, Cdkn1b, Plk3, Egr1, Egr2, Egr3, Egr4, Emd, Fos, Fosb, Fosl2, Fth1, Gpr3, Gpr19, Foxg1, Nr4a1, Ier2, Ifrd1, Ccn1, Jun, Junb, Jund, Kcnj2, Klf4, Krt16, Smad7, Maff, Mest, Cited2, Sik1, Mt1, Ppp1r15a, Gadd45b, Nfil3, Nefl, Nr4a3, Nr4a2, Pcdh8, Pcna, Per1, Ptgs2, Ptp4a1, Dusp1, Ranbp2, Rasd1, Rgs2, Rgs4, Rheb…
GO:0110165	cellular anatomical entity	CC	18604	166	9.31109e-17	Adamts1, Gla, Arc, Areg, Arf4, Atf3, Auh, Bdnf, Bcl2l11, Btg1, Btg2, Casp3, Ccnk, Cdk11b, Cdkn1a, Cdkn1b, Cenpa, Plk3, Egr1, Egr2, Egr3, Egr4, Emd, Fbl, Fos, Fosb, Fosl2, Fth1, Gpr3, Gpr19, Foxg1, Nr4a1, Ier2, Ifrd1, Ccn1, Jun, Junb, Jund, Kcnj2, Klf4, Krt16, Smad7, Maff, Mest, Cited2, Sik1, Mt1, Ppp1r15a, Gadd45b, Nfil3, Nefl, Nr4a3, Nr4a2, Pcdh8, Pcna, Per1, Slc25a3, Piga, Ptgs2, Ptp4a1, Dusp1,…
GO:0043067	regulation of programmed cell death	BP	1519	42	1.22827e-16	Arf4, Atf3, Bdnf, Bcl2l11, Btg1, Btg2, Casp3, Cdk11b, Cdkn1a, Cdkn1b, Plk3, Egr1, Egr3, Nr4a1, Ccn1, Jun, Klf4, Cited2, Mt1, Gadd45b, Nefl, Nr4a3, Nr4a2, Ptgs2, Dusp1, Scg2, Sgk1, Siah2, Plk2, Tsc22d1, Tpt1, Yap1, Gadd45g, Spry2, Fbxw7, Aldh1a3, Pmaip1, Dusp6, Nop53, Tnfrsf23, Ghsr, Irs2
GO:0048522	positive regulation of cellular process	BP	5666	84	1.29199e-16	Adamts1, Arc, Areg, Arf4, Atf3, Bdnf, Bcl2l11, Btg1, Btg2, Casp3, Ccnk, Cdkn1a, Cdkn1b, Plk3, Egr1, Egr2, Egr3, Egr4, Emd, Fos, Fosb, Fosl2, Gpr3, Foxg1, Nr4a1, Ier2, Ifrd1, Ccn1, Jun, Junb, Jund, Kcnj2, Klf4, Smad7, Maff, Cited2, Ppp1r15a, Gadd45b, Nfil3, Nefl, Nr4a3, Nr4a2, Pcna, Per1, Ptgs2, Ptp4a1, Dusp1, Ranbp2, Rgs2, Rgs4, Rheb, Scg2, Sgk1, Tra2b, Plk2, Tsc22d1, Yap1, Gadd45g, Spry2, Fbxw7,…
GO:0003674	molecular_function	MF	20522	174	1.93779e-16	Adamts1, Gla, Arc, Areg, Arf4, Atf3, Auh, Bdnf, Bcl2l11, Btg1, Btg2, Casp3, Ccnk, Cdk11b, Cdkn1a, Cdkn1b, Cenpa, Plk3, Egr1, Egr2, Egr3, Egr4, Emd, Fbl, Fos, Fosb, Fosl2, Fth1, Gpr3, Gpr19, Foxg1, Nr4a1, Ier2, Ifrd1, Ccn1, Jun, Junb, Jund, Kcnj2, Klf4, Krt16, Smad7, Maff, Mest, Cited2, Sik1, Mt1, Ppp1r15a, Gadd45b, Nfil3, Nefl, Nr4a3, Nr4a2, Pcdh8, Pcna, Per1, Slc25a3, Piga, Ptgs2, Ptp4a1, Dusp1,…
GO:0009892	negative regulation of metabolic process	BP	3053	59	3.85967e-16	Gla, Atf3, Btg2, Casp3, Cdkn1a, Cdkn1b, Plk3, Egr1, Foxg1, Nr4a1, Jun, Klf4, Smad7, Cited2, Sik1, Ppp1r15a, Gadd45b, Nfil3, Nr4a3, Nr4a2, Pcna, Per1, Ptgs2, Dusp1, Rasd1, Rgs2, Rheb, Siah2, Tra2b, Yap1, Gadd45g, Spry2, Tinf2, Fbxw7, Pard6a, Arpp19, Midn, Sap30, Zfp869, Dusp6, Nop53, Mlip, C9orf72, Errfi1, Dnajb1, Tiparp, Inpp5f, Lrrtm2, Eprs, Ghsr, Trib1, Tent5a, Arid5a, Ciart, Dusp5, Irf2bp2, H3…
GO:0009893	positive regulation of metabolic process	BP	3756	66	3.92906e-16	Areg, Arf4, Atf3, Bdnf, Bcl2l11, Btg2, Casp3, Ccnk, Cdkn1a, Cdkn1b, Plk3, Egr1, Egr2, Egr3, Egr4, Fos, Fosb, Fosl2, Gpr3, Nr4a1, Ier2, Ifrd1, Ccn1, Jun, Junb, Jund, Klf4, Smad7, Maff, Cited2, Ppp1r15a, Gadd45b, Nfil3, Nr4a3, Nr4a2, Pcna, Per1, Ptgs2, Ranbp2, Tra2b, Plk2, Tsc22d1, Yap1, Gadd45g, Spry2, Fbxw7, Rassf1, Pmaip1, Arpp19, Nop53, Rasl11a, C9orf72, Rap2a, Tnfrsf23, Tiparp, Inpp5f, Zfp957,…
GO:0032502	developmental process	BP	6266	88	4.33487e-16	Adamts1, Arc, Areg, Arf4, Atf3, Bdnf, Bcl2l11, Btg1, Btg2, Casp3, Ccnk, Cdk11b, Cdkn1a, Cdkn1b, Egr1, Egr2, Egr3, Emd, Fos, Fosl2, Foxg1, Nr4a1, Ier2, Ifrd1, Ccn1, Jun, Junb, Jund, Klf4, Krt16, Smad7, Maff, Cited2, Sik1, Gadd45b, Nefl, Nr4a3, Nr4a2, Pcdh8, Ptgs2, Ptp4a1, Dusp1, Rgs2, Rgs4, Rheb, Scg2, Sgk1, Siah2, Tra2b, Plk2, Tpt1, Yap1, Zfand5, Gadd45g, Spry2, Homer1, Ddx3y, Fbxw7, Aldh1a3, Tob…
GO:0010941	regulation of cell death	BP	1677	43	7.31076e-16	Arf4, Atf3, Bdnf, Bcl2l11, Btg1, Btg2, Casp3, Cdk11b, Cdkn1a, Cdkn1b, Plk3, Egr1, Egr3, Fos, Nr4a1, Ccn1, Jun, Klf4, Cited2, Mt1, Gadd45b, Nefl, Nr4a3, Nr4a2, Ptgs2, Dusp1, Scg2, Sgk1, Siah2, Plk2, Tsc22d1, Tpt1, Yap1, Gadd45g, Spry2, Fbxw7, Aldh1a3, Pmaip1, Dusp6, Nop53, Tnfrsf23, Ghsr, Irs2
GO:0006915	apoptotic process	BP	1848	45	8.94845e-16	Arf4, Atf3, Bdnf, Bcl2l11, Btg1, Btg2, Casp3, Cdk11b, Cdkn1a, Cdkn1b, Plk3, Egr1, Egr3, Nr4a1, Ccn1, Jun, Klf4, Cited2, Sik1, Mt1, Ppp1r15a, Gadd45b, Nefl, Nr4a3, Nr4a2, Ptgs2, Dusp1, Scg2, Sgk1, Siah2, Plk2, Tsc22d1, Tpt1, Yap1, Gadd45g, Spry2, Fbxw7, Aldh1a3, Pmaip1, Dusp6, Nop53, Tnfrsf23, Ghsr, Csrnp1, Irs2
GO:0044271	cellular nitrogen compound biosynthetic process	BP	4272	70	1.24584e-15	Gla, Arf4, Atf3, Bdnf, Btg2, Ccnk, Cdkn1a, Cdkn1b, Plk3, Egr1, Egr2, Egr3, Egr4, Fos, Fosb, Fosl2, Foxg1, Nr4a1, Ier2, Ifrd1, Ccn1, Jun, Junb, Jund, Klf4, Smad7, Maff, Cited2, Sik1, Ppp1r15a, Nfil3, Nr4a3, Nr4a2, Pcna, Per1, Ptgs2, Dusp1, Rasd1, Rgs2, Rpl21, Rpl9, Sap18, St8sia4, Tsc22d1, Yap1, Impdh2, B3galt2, Tinf2, Sap30, Atp5d, Zfp869, Rpl22l1, Nop53, Rasl11a, Mlip, Dnajb1, Taf13, Kti12, Spty…
GO:0031324	negative regulation of cellular metabolic process	BP	2565	53	1.29451e-15	Gla, Atf3, Btg2, Casp3, Cdkn1a, Cdkn1b, Plk3, Egr1, Foxg1, Nr4a1, Jun, Klf4, Smad7, Cited2, Sik1, Ppp1r15a, Gadd45b, Nfil3, Nr4a3, Nr4a2, Pcna, Per1, Ptgs2, Dusp1, Rasd1, Rgs2, Siah2, Tra2b, Gadd45g, Spry2, Tinf2, Pard6a, Arpp19, Midn, Sap30, Zfp869, Dusp6, Nop53, Mlip, C9orf72, Errfi1, Dnajb1, Inpp5f, Lrrtm2, Eprs, Trib1, Tent5a, Arid5a, Ciart, Dusp5, Irf2bp2, Dusp4, Irs2
GO:0009889	regulation of biosynthetic process	BP	3877	66	1.88884e-15	Gla, Arf4, Atf3, Bdnf, Btg2, Ccnk, Cdkn1a, Cdkn1b, Plk3, Egr1, Egr2, Egr3, Egr4, Fos, Fosb, Fosl2, Foxg1, Nr4a1, Ier2, Ifrd1, Ccn1, Jun, Junb, Jund, Klf4, Smad7, Maff, Cited2, Sik1, Ppp1r15a, Nfil3, Nr4a3, Nr4a2, Pcna, Per1, Ptgs2, Dusp1, Ranbp2, Rasd1, Rgs2, Sap18, Tsc22d1, Yap1, Tinf2, Arpp19, Sap30, Zfp869, Nop53, Rasl11a, Mlip, Errfi1, Dnajb1, Kti12, Spty2d1, Zfp957, Eprs, Trib1, Arid5a, Csrn…
GO:0042326	negative regulation of phosphorylation	BP	469	24	1.89868e-15	Atf3, Casp3, Cdkn1a, Cdkn1b, Jun, Klf4, Smad7, Ppp1r15a, Gadd45b, Per1, Dusp1, Rgs2, Gadd45g, Spry2, Pard6a, Midn, Dusp6, C9orf72, Errfi1, Inpp5f, Trib1, Dusp5, Dusp4, Irs2
GO:0012501	programmed cell death	BP	1894	45	2.19403e-15	Arf4, Atf3, Bdnf, Bcl2l11, Btg1, Btg2, Casp3, Cdk11b, Cdkn1a, Cdkn1b, Plk3, Egr1, Egr3, Nr4a1, Ccn1, Jun, Klf4, Cited2, Sik1, Mt1, Ppp1r15a, Gadd45b, Nefl, Nr4a3, Nr4a2, Ptgs2, Dusp1, Scg2, Sgk1, Siah2, Plk2, Tsc22d1, Tpt1, Yap1, Gadd45g, Spry2, Fbxw7, Aldh1a3, Pmaip1, Dusp6, Nop53, Tnfrsf23, Ghsr, Csrnp1, Irs2
GO:0051173	positive regulation of nitrogen compound metabolic proces...	BP	3077	58	2.28709e-15	Areg, Arf4, Atf3, Bdnf, Bcl2l11, Btg2, Casp3, Ccnk, Cdkn1a, Cdkn1b, Plk3, Egr1, Egr2, Egr3, Egr4, Fos, Fosb, Fosl2, Nr4a1, Ier2, Ifrd1, Ccn1, Jun, Junb, Jund, Klf4, Smad7, Maff, Cited2, Ppp1r15a, Gadd45b, Nfil3, Nr4a3, Nr4a2, Pcna, Per1, Ptgs2, Tra2b, Plk2, Tsc22d1, Yap1, Gadd45g, Spry2, Fbxw7, Rassf1, Pmaip1, Nop53, Rasl11a, Rap2a, Tnfrsf23, Tiparp, Zfp957, Trib1, Arid5a, Csrnp1, Kdm6b, Npas4, A…
GO:0010605	negative regulation of macromolecule metabolic process	BP	2795	55	2.54718e-15	Atf3, Btg2, Casp3, Cdkn1a, Cdkn1b, Plk3, Egr1, Foxg1, Nr4a1, Jun, Klf4, Smad7, Cited2, Sik1, Ppp1r15a, Gadd45b, Nfil3, Nr4a3, Nr4a2, Pcna, Per1, Ptgs2, Dusp1, Rasd1, Rgs2, Siah2, Tra2b, Yap1, Gadd45g, Spry2, Tinf2, Fbxw7, Pard6a, Arpp19, Sap30, Zfp869, Dusp6, Nop53, Mlip, C9orf72, Errfi1, Dnajb1, Tiparp, Inpp5f, Lrrtm2, Eprs, Ghsr, Trib1, Tent5a, Arid5a, Ciart, Dusp5, Irf2bp2, H3c6, Dusp4
GO:0051172	negative regulation of nitrogen compound metabolic proces...	BP	2364	50	4.20765e-15	Gla, Atf3, Btg2, Casp3, Cdkn1a, Cdkn1b, Plk3, Egr1, Foxg1, Nr4a1, Jun, Klf4, Smad7, Cited2, Sik1, Ppp1r15a, Gadd45b, Nfil3, Nr4a3, Nr4a2, Pcna, Per1, Ptgs2, Dusp1, Rasd1, Rgs2, Siah2, Tra2b, Gadd45g, Spry2, Tinf2, Pard6a, Arpp19, Sap30, Zfp869, Dusp6, Nop53, Mlip, C9orf72, Errfi1, Dnajb1, Inpp5f, Eprs, Trib1, Tent5a, Arid5a, Ciart, Dusp5, Irf2bp2, Dusp4
GO:0009058	biosynthetic process	BP	5403	79	4.28467e-15	Gla, Arf4, Atf3, Bdnf, Btg2, Ccnk, Cdkn1a, Cdkn1b, Plk3, Egr1, Egr2, Egr3, Egr4, Fos, Fosb, Fosl2, Foxg1, Nr4a1, Ier2, Ifrd1, Ccn1, Jun, Junb, Jund, Klf4, Smad7, Maff, Cited2, Sik1, Ppp1r15a, Nfil3, Nr4a3, Nr4a2, Pcna, Per1, Piga, Ptgs2, Dusp1, Ranbp2, Rasd1, Rgs2, Rpl21, Rpl9, Sap18, St8sia4, Tsc22d1, Yap1, Impdh2, B3galt2, Tinf2, Aldh1a3, Arpp19, Sap30, Atp5d, Wdr45b, Zfp869, Coq10b, Rpl22l1, N…
GO:0010467	gene expression	BP	5531	80	4.72846e-15	Arf4, Atf3, Bdnf, Btg2, Casp3, Ccnk, Cdk11b, Cdkn1a, Cdkn1b, Plk3, Egr1, Egr2, Egr3, Egr4, Fbl, Fos, Fosb, Fosl2, Foxg1, Nr4a1, Ier2, Ifrd1, Ccn1, Jun, Junb, Jund, Klf4, Smad7, Maff, Cited2, Sik1, Ppp1r15a, Nfil3, Nr4a3, Nr4a2, Pcna, Per1, Ptgs2, Rasd1, Rgs2, Rpl21, Rpl9, Sap18, Tra2b, Snu13, Tsc22d1, Yap1, Gadd45g, Spry2, Fbxw7, Tob2, Sap30, Zfp869, Cwc25, Rpl22l1, Nop53, Rasl11a, Mlip, Errfi1, …
GO:0010604	positive regulation of macromolecule metabolic process	BP	3445	61	5.85044e-15	Areg, Arf4, Atf3, Bdnf, Bcl2l11, Btg2, Casp3, Ccnk, Cdkn1a, Cdkn1b, Plk3, Egr1, Egr2, Egr3, Egr4, Fos, Fosb, Fosl2, Nr4a1, Ier2, Ifrd1, Ccn1, Jun, Junb, Jund, Klf4, Smad7, Maff, Cited2, Ppp1r15a, Gadd45b, Nfil3, Nr4a3, Nr4a2, Pcna, Per1, Ptgs2, Tra2b, Plk2, Tsc22d1, Yap1, Gadd45g, Spry2, Fbxw7, Rassf1, Pmaip1, Nop53, Rasl11a, Rap2a, Tnfrsf23, Tiparp, Inpp5f, Zfp957, Trib1, Tent5a, Arid5a, Csrnp1,…
GO:0048731	system development	BP	4776	73	8.91556e-15	Adamts1, Arc, Areg, Arf4, Atf3, Bdnf, Bcl2l11, Btg1, Btg2, Casp3, Cdkn1a, Cdkn1b, Egr1, Egr2, Egr3, Emd, Fos, Fosl2, Foxg1, Nr4a1, Ier2, Ifrd1, Ccn1, Jun, Junb, Klf4, Krt16, Smad7, Maff, Cited2, Sik1, Nefl, Nr4a3, Nr4a2, Ptgs2, Rgs2, Rgs4, Rheb, Scg2, Sgk1, Tra2b, Plk2, Yap1, Zfand5, Gadd45g, Spry2, Homer1, Fbxw7, Aldh1a3, Tob2, Sap30, Dusp6, C9orf72, Errfi1, Rap2a, Ndel1, Tiparp, Inpp5f, Lrrtm2,…
GO:0007049	cell cycle	BP	1641	41	9.39991e-15	Adamts1, Bcl2l11, Btg1, Btg2, Casp3, Ccnk, Cdk11b, Cdkn1a, Cdkn1b, Cenpa, Plk3, Gpr3, Foxg1, Nr4a1, Jun, Junb, Jund, Klf4, Cited2, Sik1, Gadd45b, Nr4a3, Pcna, Ptgs2, Ptp4a1, Dusp1, Rgs2, Sgk1, Siah2, Slc16a1, Plk2, Gadd45g, Spry2, Fbxw7, Rassf1, Pard6a, Arpp19, Chmp1b, Nop53, Ndel1, Kif18a
GO:0043066	negative regulation of apoptotic process	BP	913	31	9.41143e-15	Arf4, Bdnf, Btg2, Casp3, Cdk11b, Cdkn1a, Cdkn1b, Plk3, Egr3, Nr4a1, Ccn1, Jun, Klf4, Cited2, Mt1, Nefl, Nr4a3, Nr4a2, Ptgs2, Dusp1, Scg2, Sgk1, Siah2, Plk2, Tsc22d1, Tpt1, Yap1, Spry2, Tnfrsf23, Ghsr, Irs2
GO:0031326	regulation of cellular biosynthetic process	BP	3799	64	1.00807e-14	Gla, Arf4, Atf3, Bdnf, Btg2, Ccnk, Cdkn1a, Cdkn1b, Plk3, Egr1, Egr2, Egr3, Egr4, Fos, Fosb, Fosl2, Foxg1, Nr4a1, Ier2, Ifrd1, Ccn1, Jun, Junb, Jund, Klf4, Smad7, Maff, Cited2, Sik1, Ppp1r15a, Nfil3, Nr4a3, Nr4a2, Pcna, Per1, Ptgs2, Dusp1, Rasd1, Rgs2, Sap18, Tsc22d1, Yap1, Tinf2, Arpp19, Sap30, Zfp869, Nop53, Rasl11a, Mlip, Dnajb1, Kti12, Spty2d1, Zfp957, Eprs, Trib1, Arid5a, Csrnp1, Kdm6b, Npas4…
GO:0008219	cell death	BP	2064	46	1.05177e-14	Arf4, Atf3, Bdnf, Bcl2l11, Btg1, Btg2, Casp3, Cdk11b, Cdkn1a, Cdkn1b, Plk3, Egr1, Egr3, Fos, Nr4a1, Ccn1, Jun, Klf4, Cited2, Sik1, Mt1, Ppp1r15a, Gadd45b, Nefl, Nr4a3, Nr4a2, Ptgs2, Dusp1, Scg2, Sgk1, Siah2, Plk2, Tsc22d1, Tpt1, Yap1, Gadd45g, Spry2, Fbxw7, Aldh1a3, Pmaip1, Dusp6, Nop53, Tnfrsf23, Ghsr, Csrnp1, Irs2
GO:0034645	cellular macromolecule biosynthetic process	BP	4355	69	1.21371e-14	Arf4, Atf3, Bdnf, Btg2, Ccnk, Cdkn1a, Cdkn1b, Plk3, Egr1, Egr2, Egr3, Egr4, Fos, Fosb, Fosl2, Foxg1, Nr4a1, Ier2, Ifrd1, Ccn1, Jun, Junb, Jund, Klf4, Smad7, Maff, Cited2, Sik1, Ppp1r15a, Nfil3, Nr4a3, Nr4a2, Pcna, Per1, Piga, Dusp1, Rasd1, Rgs2, Rpl21, Rpl9, Sap18, St8sia4, Tsc22d1, Yap1, B3galt2, Tinf2, Sap30, Wdr45b, Zfp869, Rpl22l1, Nop53, Rasl11a, Mlip, Dnajb1, Taf13, Kti12, Spty2d1, Zfp957, …
GO:0045936	negative regulation of phosphate metabolic process	BP	564	25	1.2614e-14	Atf3, Casp3, Cdkn1a, Cdkn1b, Jun, Klf4, Smad7, Ppp1r15a, Gadd45b, Per1, Dusp1, Rgs2, Gadd45g, Spry2, Pard6a, Arpp19, Midn, Dusp6, C9orf72, Errfi1, Inpp5f, Trib1, Dusp5, Dusp4, Irs2
GO:0010563	negative regulation of phosphorus metabolic process	BP	564	25	1.2614e-14	Atf3, Casp3, Cdkn1a, Cdkn1b, Jun, Klf4, Smad7, Ppp1r15a, Gadd45b, Per1, Dusp1, Rgs2, Gadd45g, Spry2, Pard6a, Arpp19, Midn, Dusp6, C9orf72, Errfi1, Inpp5f, Trib1, Dusp5, Dusp4, Irs2
GO:0051716	cellular response to stimulus	BP	7665	96	1.39292e-14	Arc, Areg, Arf4, Atf3, Bdnf, Bcl2l11, Btg2, Casp3, Ccnk, Cdk11b, Cdkn1a, Cdkn1b, Plk3, Egr1, Egr2, Egr3, Emd, Fos, Fosb, Gpr3, Gpr19, Nr4a1, Ccn1, Jun, Junb, Jund, Klf4, Smad7, Cited2, Sik1, Mt1, Ppp1r15a, Gadd45b, Nfil3, Nefl, Nr4a3, Nr4a2, Pcna, Per1, Piga, Ptgs2, Dusp1, Rasd1, Rgs2, Rgs4, Rheb, Scg2, Sgk1, Siah2, Tra2b, Slc16a1, Plk2, Tpt1, Yap1, Zfand5, Gadd45g, Impdh2, Spry2, Homer1, Hspa14,…
GO:0050896	response to stimulus	BP	9337	108	1.56142e-14	Arc, Areg, Arf4, Atf3, Bdnf, Bcl2l11, Btg2, Casp3, Ccnk, Cdk11b, Cdkn1a, Cdkn1b, Plk3, Egr1, Egr2, Egr3, Emd, Fos, Fosb, Fosl2, Gpr3, Gpr19, Foxg1, Nr4a1, Ier2, Ccn1, Jun, Junb, Jund, Klf4, Krt16, Smad7, Mest, Cited2, Sik1, Mt1, Ppp1r15a, Gadd45b, Nfil3, Nefl, Nr4a3, Nr4a2, Pcna, Per1, Piga, Ptgs2, Dusp1, Rasd1, Rgs2, Rgs4, Rheb, Scg2, Sgk1, Siah2, Tra2b, Slc16a1, Plk2, Srp14, Tpt1, Yap1, Zfand5,…
GO:0043069	negative regulation of programmed cell death	BP	933	31	1.68261e-14	Arf4, Bdnf, Btg2, Casp3, Cdk11b, Cdkn1a, Cdkn1b, Plk3, Egr3, Nr4a1, Ccn1, Jun, Klf4, Cited2, Mt1, Nefl, Nr4a3, Nr4a2, Ptgs2, Dusp1, Scg2, Sgk1, Siah2, Plk2, Tsc22d1, Tpt1, Yap1, Spry2, Tnfrsf23, Ghsr, Irs2
GO:0001933	negative regulation of protein phosphorylation	BP	423	22	2.17768e-14	Atf3, Casp3, Cdkn1a, Cdkn1b, Jun, Klf4, Smad7, Ppp1r15a, Gadd45b, Per1, Dusp1, Rgs2, Gadd45g, Spry2, Pard6a, Dusp6, C9orf72, Errfi1, Inpp5f, Trib1, Dusp5, Dusp4
GO:0009059	macromolecule biosynthetic process	BP	4410	69	2.27417e-14	Arf4, Atf3, Bdnf, Btg2, Ccnk, Cdkn1a, Cdkn1b, Plk3, Egr1, Egr2, Egr3, Egr4, Fos, Fosb, Fosl2, Foxg1, Nr4a1, Ier2, Ifrd1, Ccn1, Jun, Junb, Jund, Klf4, Smad7, Maff, Cited2, Sik1, Ppp1r15a, Nfil3, Nr4a3, Nr4a2, Pcna, Per1, Piga, Dusp1, Rasd1, Rgs2, Rpl21, Rpl9, Sap18, St8sia4, Tsc22d1, Yap1, B3galt2, Tinf2, Sap30, Wdr45b, Zfp869, Rpl22l1, Nop53, Rasl11a, Mlip, Dnajb1, Taf13, Kti12, Spty2d1, Zfp957, …
GO:0044249	cellular biosynthetic process	BP	5218	76	2.46568e-14	Gla, Arf4, Atf3, Bdnf, Btg2, Ccnk, Cdkn1a, Cdkn1b, Plk3, Egr1, Egr2, Egr3, Egr4, Fos, Fosb, Fosl2, Foxg1, Nr4a1, Ier2, Ifrd1, Ccn1, Jun, Junb, Jund, Klf4, Smad7, Maff, Cited2, Sik1, Ppp1r15a, Nfil3, Nr4a3, Nr4a2, Pcna, Per1, Piga, Ptgs2, Dusp1, Rasd1, Rgs2, Rpl21, Rpl9, Sap18, St8sia4, Tsc22d1, Yap1, Impdh2, B3galt2, Tinf2, Aldh1a3, Arpp19, Sap30, Atp5d, Wdr45b, Zfp869, Coq10b, Rpl22l1, Nop53, Ra…
GO:0019219	regulation of nucleobase-containing compound metabolic pr...	BP	3669	62	2.75487e-14	Arf4, Atf3, Bdnf, Btg2, Ccnk, Cdk11b, Cdkn1a, Cdkn1b, Plk3, Egr1, Egr2, Egr3, Egr4, Fos, Fosb, Fosl2, Foxg1, Nr4a1, Ier2, Ifrd1, Ccn1, Jun, Junb, Jund, Klf4, Smad7, Maff, Cited2, Sik1, Ppp1r15a, Nfil3, Nr4a3, Nr4a2, Pcna, Per1, Dusp1, Rasd1, Sap18, Tra2b, Tsc22d1, Yap1, Tinf2, Sap30, Zfp869, Nop53, Rasl11a, Mlip, Dnajb1, Kti12, Spty2d1, Zfp957, Trib1, Tent5a, Arid5a, Csrnp1, Kdm6b, Npas4, Ciart, …
GO:0033554	cellular response to stress	BP	1784	42	3.13199e-14	Atf3, Bcl2l11, Btg2, Casp3, Ccnk, Cdkn1a, Plk3, Egr1, Fos, Jun, Klf4, Cited2, Sik1, Ppp1r15a, Gadd45b, Nefl, Nr4a3, Nr4a2, Pcna, Per1, Ptgs2, Dusp1, Sgk1, Plk2, Tpt1, Yap1, Gadd45g, Hspa14, Fbxw7, Rassf1, Pmaip1, Wdr45b, Nop53, Errfi1, Rap2a, Tnfrsf23, Dnajb1, Ndel1, Inpp5f, Trib1, Kdm6b, Npas4
GO:0034641	cellular nitrogen compound metabolic process	BP	5741	80	3.89531e-14	Gla, Arf4, Atf3, Bdnf, Btg2, Casp3, Ccnk, Cdk11b, Cdkn1a, Cdkn1b, Plk3, Egr1, Egr2, Egr3, Egr4, Fbl, Fos, Fosb, Fosl2, Foxg1, Nr4a1, Ier2, Ifrd1, Ccn1, Jun, Junb, Jund, Klf4, Smad7, Maff, Cited2, Sik1, Ppp1r15a, Nfil3, Nr4a3, Nr4a2, Pcna, Per1, Ptgs2, Dusp1, Rasd1, Rgs2, Rpl21, Rpl9, Sap18, St8sia4, Tra2b, Snu13, Tsc22d1, Yap1, Impdh2, B3galt2, Tinf2, Sap30, Atp5d, Zfp869, Cwc25, Rpl22l1, Nop53, …
GO:0010468	regulation of gene expression	BP	4576	70	4.14771e-14	Arf4, Atf3, Bdnf, Btg2, Ccnk, Cdk11b, Cdkn1a, Cdkn1b, Plk3, Egr1, Egr2, Egr3, Egr4, Fos, Fosb, Fosl2, Foxg1, Nr4a1, Ier2, Ifrd1, Ccn1, Jun, Junb, Jund, Klf4, Smad7, Maff, Cited2, Sik1, Ppp1r15a, Nfil3, Nr4a3, Nr4a2, Pcna, Per1, Ptgs2, Rasd1, Rgs2, Sap18, Tra2b, Tsc22d1, Yap1, Spry2, Fbxw7, Tob2, Sap30, Zfp869, Nop53, Rasl11a, Mlip, Errfi1, Dnajb1, Tiparp, Kti12, Spty2d1, Zfp957, Eprs, Ghsr, Trib1…
GO:2000112	regulation of cellular macromolecule biosynthetic process	BP	3598	61	4.20138e-14	Arf4, Atf3, Bdnf, Btg2, Ccnk, Cdkn1a, Cdkn1b, Plk3, Egr1, Egr2, Egr3, Egr4, Fos, Fosb, Fosl2, Foxg1, Nr4a1, Ier2, Ifrd1, Ccn1, Jun, Junb, Jund, Klf4, Smad7, Maff, Cited2, Sik1, Ppp1r15a, Nfil3, Nr4a3, Nr4a2, Pcna, Per1, Dusp1, Rasd1, Rgs2, Sap18, Tsc22d1, Yap1, Tinf2, Sap30, Zfp869, Nop53, Rasl11a, Mlip, Dnajb1, Kti12, Spty2d1, Zfp957, Eprs, Trib1, Arid5a, Csrnp1, Kdm6b, Npas4, Ciart, Dusp5, Irf2…
GO:0034654	nucleobase-containing compound biosynthetic process	BP	3611	61	4.94043e-14	Arf4, Atf3, Bdnf, Btg2, Ccnk, Cdkn1a, Cdkn1b, Plk3, Egr1, Egr2, Egr3, Egr4, Fos, Fosb, Fosl2, Foxg1, Nr4a1, Ier2, Ifrd1, Ccn1, Jun, Junb, Jund, Klf4, Smad7, Maff, Cited2, Sik1, Ppp1r15a, Nfil3, Nr4a3, Nr4a2, Pcna, Per1, Dusp1, Rasd1, Sap18, Tsc22d1, Yap1, Impdh2, Tinf2, Sap30, Atp5d, Zfp869, Nop53, Rasl11a, Mlip, Dnajb1, Taf13, Kti12, Spty2d1, Zfp957, Trib1, Arid5a, Csrnp1, Kdm6b, Npas4, Ciart, D…
GO:1901576	organic substance biosynthetic process	BP	5307	76	6.11458e-14	Arf4, Atf3, Bdnf, Btg2, Ccnk, Cdkn1a, Cdkn1b, Plk3, Egr1, Egr2, Egr3, Egr4, Fos, Fosb, Fosl2, Foxg1, Nr4a1, Ier2, Ifrd1, Ccn1, Jun, Junb, Jund, Klf4, Smad7, Maff, Cited2, Sik1, Ppp1r15a, Nfil3, Nr4a3, Nr4a2, Pcna, Per1, Piga, Ptgs2, Dusp1, Ranbp2, Rasd1, Rgs2, Rpl21, Rpl9, Sap18, St8sia4, Tsc22d1, Yap1, Impdh2, B3galt2, Tinf2, Aldh1a3, Arpp19, Sap30, Atp5d, Wdr45b, Zfp869, Coq10b, Rpl22l1, Nop53,…
GO:0051252	regulation of RNA metabolic process	BP	3425	59	6.52196e-14	Arf4, Atf3, Bdnf, Btg2, Ccnk, Cdk11b, Cdkn1b, Plk3, Egr1, Egr2, Egr3, Egr4, Fos, Fosb, Fosl2, Foxg1, Nr4a1, Ier2, Ifrd1, Ccn1, Jun, Junb, Jund, Klf4, Smad7, Maff, Cited2, Sik1, Ppp1r15a, Nfil3, Nr4a3, Nr4a2, Pcna, Per1, Rasd1, Sap18, Tra2b, Tsc22d1, Yap1, Sap30, Zfp869, Nop53, Rasl11a, Mlip, Dnajb1, Kti12, Spty2d1, Zfp957, Trib1, Tent5a, Arid5a, Csrnp1, Kdm6b, Npas4, Ciart, Ythdc1, Dusp5, Irf2bp2…
GO:0010556	regulation of macromolecule biosynthetic process	BP	3646	61	7.61107e-14	Arf4, Atf3, Bdnf, Btg2, Ccnk, Cdkn1a, Cdkn1b, Plk3, Egr1, Egr2, Egr3, Egr4, Fos, Fosb, Fosl2, Foxg1, Nr4a1, Ier2, Ifrd1, Ccn1, Jun, Junb, Jund, Klf4, Smad7, Maff, Cited2, Sik1, Ppp1r15a, Nfil3, Nr4a3, Nr4a2, Pcna, Per1, Dusp1, Rasd1, Rgs2, Sap18, Tsc22d1, Yap1, Tinf2, Sap30, Zfp869, Nop53, Rasl11a, Mlip, Dnajb1, Kti12, Spty2d1, Zfp957, Eprs, Trib1, Arid5a, Csrnp1, Kdm6b, Npas4, Ciart, Dusp5, Irf2…
GO:0042221	response to chemical	BP	3973	64	8.22282e-14	Areg, Atf3, Bdnf, Casp3, Cdkn1b, Plk3, Egr1, Egr2, Egr3, Emd, Fos, Fosb, Fosl2, Foxg1, Nr4a1, Ier2, Ccn1, Jun, Junb, Jund, Klf4, Smad7, Mest, Cited2, Mt1, Ppp1r15a, Nfil3, Nefl, Nr4a3, Nr4a2, Pcna, Per1, Piga, Ptgs2, Dusp1, Rgs4, Scg2, Sgk1, Tra2b, Slc16a1, Srp14, Yap1, Impdh2, Spry2, Homer1, Hspa14, Fbxw7, Nop53, Rasl11b, Spaar, Rap2a, Ndel1, Tiparp, Eprs, Ghsr, Trib1, Arid5a, Kdm6b, Npas4, Ina,…
GO:0018130	heterocycle biosynthetic process	BP	3676	61	1.09717e-13	Arf4, Atf3, Bdnf, Btg2, Ccnk, Cdkn1a, Cdkn1b, Plk3, Egr1, Egr2, Egr3, Egr4, Fos, Fosb, Fosl2, Foxg1, Nr4a1, Ier2, Ifrd1, Ccn1, Jun, Junb, Jund, Klf4, Smad7, Maff, Cited2, Sik1, Ppp1r15a, Nfil3, Nr4a3, Nr4a2, Pcna, Per1, Dusp1, Rasd1, Sap18, Tsc22d1, Yap1, Impdh2, Tinf2, Sap30, Atp5d, Zfp869, Nop53, Rasl11a, Mlip, Dnajb1, Taf13, Kti12, Spty2d1, Zfp957, Trib1, Arid5a, Csrnp1, Kdm6b, Npas4, Ciart, D…
GO:0019438	aromatic compound biosynthetic process	BP	3689	61	1.28388e-13	Arf4, Atf3, Bdnf, Btg2, Ccnk, Cdkn1a, Cdkn1b, Plk3, Egr1, Egr2, Egr3, Egr4, Fos, Fosb, Fosl2, Foxg1, Nr4a1, Ier2, Ifrd1, Ccn1, Jun, Junb, Jund, Klf4, Smad7, Maff, Cited2, Sik1, Ppp1r15a, Nfil3, Nr4a3, Nr4a2, Pcna, Per1, Dusp1, Rasd1, Sap18, Tsc22d1, Yap1, Impdh2, Tinf2, Sap30, Atp5d, Zfp869, Nop53, Rasl11a, Mlip, Dnajb1, Taf13, Kti12, Spty2d1, Zfp957, Trib1, Arid5a, Csrnp1, Kdm6b, Npas4, Ciart, D…
GO:0070887	cellular response to chemical stimulus	BP	2972	54	1.31158e-13	Atf3, Bdnf, Casp3, Cdkn1b, Plk3, Egr1, Egr2, Egr3, Emd, Fos, Fosb, Nr4a1, Ccn1, Jun, Junb, Jund, Klf4, Smad7, Cited2, Mt1, Ppp1r15a, Nfil3, Nr4a3, Nr4a2, Pcna, Per1, Piga, Ptgs2, Dusp1, Rgs4, Scg2, Sgk1, Tra2b, Slc16a1, Yap1, Impdh2, Spry2, Hspa14, Fbxw7, Nop53, Rasl11b, Spaar, Rap2a, Ndel1, Tiparp, Eprs, Ghsr, Trib1, Arid5a, Kdm6b, Npas4, Ina, Irs2, Mir132
GO:0043412	macromolecule modification	BP	3698	61	1.43077e-13	Areg, Arf4, Atf3, Bdnf, Btg1, Btg2, Casp3, Ccnk, Cdk11b, Cdkn1a, Cdkn1b, Plk3, Egr1, Egr2, Fbl, Ccn1, Jun, Klf4, Smad7, Sik1, Ppp1r15a, Gadd45b, Per1, Piga, Ptgs2, Dusp1, Ranbp2, Rgs2, Scg2, Sgk1, Siah2, St8sia4, Plk2, Ubc, Gadd45g, Spry2, B3galt2, Tinf2, Fbxw7, Rassf1, Pard6a, Arpp19, Wdr45b, Dusp6, Nop53, Otud1, C9orf72, Errfi1, Josd1, Rap2a, Tnfrsf23, Tiparp, Kti12, Inpp5f, Tyw3, Trib1, Arid5a…
GO:0016070	RNA metabolic process	BP	4140	65	1.59651e-13	Arf4, Atf3, Bdnf, Btg2, Ccnk, Cdk11b, Cdkn1b, Plk3, Egr1, Egr2, Egr3, Egr4, Fbl, Fos, Fosb, Fosl2, Foxg1, Nr4a1, Ier2, Ifrd1, Ccn1, Jun, Junb, Jund, Klf4, Smad7, Maff, Cited2, Sik1, Ppp1r15a, Nfil3, Nr4a3, Nr4a2, Pcna, Per1, Rasd1, Sap18, Tra2b, Snu13, Tsc22d1, Yap1, Sap30, Zfp869, Cwc25, Nop53, Rasl11a, Mlip, Dnajb1, Taf13, Kti12, Spty2d1, Zfp957, Eprs, Tyw3, Trib1, Tent5a, Arid5a, Csrnp1, Kdm6b…
GO:0010646	regulation of cell communication	BP	3393	58	1.60895e-13	Arc, Areg, Atf3, Bdnf, Bcl2l11, Cdk11b, Egr1, Emd, Gpr3, Ccn1, Jun, Klf4, Smad7, Cited2, Gadd45b, Nr4a2, Pcdh8, Per1, Ptgs2, Dusp1, Rgs2, Rgs4, Rheb, Scg2, Siah2, Slc16a1, Plk2, Tpt1, Yap1, Gadd45g, Spry2, Homer1, Fbxw7, Nptx2, Aldh1a3, Pmaip1, Arpp19, Midn, Dusp6, Nop53, Rasl11b, Spaar, C9orf72, Errfi1, Rap2a, Tnfrsf23, Inpp5f, Lrrtm2, Ghsr, Trib1, Npas4, Kctd12, Dusp5, Dusp4, Vgf, Irs2, Mir132,…
GO:0023051	regulation of signaling	BP	3407	58	1.91761e-13	Arc, Areg, Atf3, Bdnf, Bcl2l11, Cdk11b, Egr1, Emd, Gpr3, Ccn1, Jun, Klf4, Smad7, Cited2, Gadd45b, Nr4a2, Pcdh8, Per1, Ptgs2, Dusp1, Rgs2, Rgs4, Rheb, Scg2, Siah2, Slc16a1, Plk2, Tpt1, Yap1, Gadd45g, Spry2, Homer1, Fbxw7, Nptx2, Aldh1a3, Pmaip1, Arpp19, Midn, Dusp6, Nop53, Rasl11b, Spaar, C9orf72, Errfi1, Rap2a, Tnfrsf23, Inpp5f, Lrrtm2, Ghsr, Trib1, Npas4, Kctd12, Dusp5, Dusp4, Vgf, Irs2, Mir132,…
GO:0006464	cellular protein modification process	BP	3518	59	2.08449e-13	Areg, Arf4, Atf3, Bdnf, Btg1, Btg2, Casp3, Ccnk, Cdk11b, Cdkn1a, Cdkn1b, Plk3, Egr1, Egr2, Fbl, Ccn1, Jun, Klf4, Smad7, Sik1, Ppp1r15a, Gadd45b, Per1, Piga, Ptgs2, Dusp1, Ranbp2, Rgs2, Scg2, Sgk1, Siah2, St8sia4, Plk2, Ubc, Gadd45g, Spry2, B3galt2, Tinf2, Fbxw7, Rassf1, Pard6a, Arpp19, Wdr45b, Dusp6, Nop53, Otud1, C9orf72, Errfi1, Josd1, Rap2a, Tnfrsf23, Tiparp, Inpp5f, Trib1, Arid5a, Kdm6b, Dusp…
GO:0036211	protein modification process	BP	3518	59	2.08449e-13	Areg, Arf4, Atf3, Bdnf, Btg1, Btg2, Casp3, Ccnk, Cdk11b, Cdkn1a, Cdkn1b, Plk3, Egr1, Egr2, Fbl, Ccn1, Jun, Klf4, Smad7, Sik1, Ppp1r15a, Gadd45b, Per1, Piga, Ptgs2, Dusp1, Ranbp2, Rgs2, Scg2, Sgk1, Siah2, St8sia4, Plk2, Ubc, Gadd45g, Spry2, B3galt2, Tinf2, Fbxw7, Rassf1, Pard6a, Arpp19, Wdr45b, Dusp6, Nop53, Otud1, C9orf72, Errfi1, Josd1, Rap2a, Tnfrsf23, Tiparp, Inpp5f, Trib1, Arid5a, Kdm6b, Dusp…
GO:0048869	cellular developmental process	BP	4300	66	2.75457e-13	Adamts1, Arc, Areg, Arf4, Atf3, Bdnf, Btg1, Btg2, Casp3, Ccnk, Cdkn1a, Cdkn1b, Egr1, Egr2, Egr3, Emd, Fos, Fosl2, Foxg1, Nr4a1, Ier2, Ifrd1, Ccn1, Jun, Junb, Jund, Klf4, Krt16, Smad7, Maff, Cited2, Sik1, Gadd45b, Nefl, Nr4a3, Nr4a2, Ptgs2, Rgs2, Rgs4, Rheb, Sgk1, Plk2, Yap1, Gadd45g, Spry2, Homer1, Ddx3y, Fbxw7, Tob2, Sap30, C9orf72, Errfi1, Rap2a, Ndel1, Tiparp, Inpp5f, Trib1, Arid5a, Kdm6b, Npa…
GO:0031400	negative regulation of protein modification process	BP	590	24	2.82595e-13	Atf3, Casp3, Cdkn1a, Cdkn1b, Jun, Klf4, Smad7, Ppp1r15a, Gadd45b, Per1, Dusp1, Rgs2, Gadd45g, Spry2, Tinf2, Pard6a, Arpp19, Dusp6, C9orf72, Errfi1, Inpp5f, Trib1, Dusp5, Dusp4
GO:0006351	transcription, DNA-templated	BP	3243	56	3.26325e-13	Arf4, Atf3, Bdnf, Btg2, Ccnk, Cdkn1b, Plk3, Egr1, Egr2, Egr3, Egr4, Fos, Fosb, Fosl2, Foxg1, Nr4a1, Ier2, Ifrd1, Ccn1, Jun, Junb, Jund, Klf4, Smad7, Maff, Cited2, Sik1, Ppp1r15a, Nfil3, Nr4a3, Nr4a2, Pcna, Per1, Rasd1, Sap18, Tsc22d1, Yap1, Sap30, Zfp869, Nop53, Rasl11a, Mlip, Dnajb1, Taf13, Kti12, Spty2d1, Zfp957, Trib1, Arid5a, Csrnp1, Kdm6b, Npas4, Ciart, Dusp5, Irf2bp2, Mn1
GO:0032501	multicellular organismal process	BP	8189	97	3.4702e-13	Adamts1, Arc, Areg, Arf4, Atf3, Bdnf, Bcl2l11, Btg1, Btg2, Casp3, Ccnk, Cdk11b, Cdkn1a, Cdkn1b, Egr1, Egr2, Egr3, Emd, Fos, Fosl2, Gpr3, Foxg1, Nr4a1, Ier2, Ifrd1, Ccn1, Jun, Junb, Jund, Kcnj2, Klf4, Krt16, Smad7, Maff, Cited2, Sik1, Gadd45b, Nefl, Nr4a3, Nr4a2, Pcdh8, Per1, Ptgs2, Ptp4a1, Dusp1, Rgs2, Rgs4, Rheb, Scg2, Sgk1, Siah2, Tra2b, Plk2, Tpt1, Yap1, Zfand5, Gadd45g, Spry2, Homer1, Ddx3y, …
GO:0097659	nucleic acid-templated transcription	BP	3250	56	3.56635e-13	Arf4, Atf3, Bdnf, Btg2, Ccnk, Cdkn1b, Plk3, Egr1, Egr2, Egr3, Egr4, Fos, Fosb, Fosl2, Foxg1, Nr4a1, Ier2, Ifrd1, Ccn1, Jun, Junb, Jund, Klf4, Smad7, Maff, Cited2, Sik1, Ppp1r15a, Nfil3, Nr4a3, Nr4a2, Pcna, Per1, Rasd1, Sap18, Tsc22d1, Yap1, Sap30, Zfp869, Nop53, Rasl11a, Mlip, Dnajb1, Taf13, Kti12, Spty2d1, Zfp957, Trib1, Arid5a, Csrnp1, Kdm6b, Npas4, Ciart, Dusp5, Irf2bp2, Mn1
GO:0030154	cell differentiation	BP	4213	65	3.59741e-13	Adamts1, Arc, Areg, Arf4, Atf3, Bdnf, Btg1, Btg2, Casp3, Ccnk, Cdkn1b, Egr1, Egr2, Egr3, Emd, Fos, Fosl2, Foxg1, Nr4a1, Ier2, Ifrd1, Ccn1, Jun, Junb, Jund, Klf4, Krt16, Smad7, Maff, Cited2, Sik1, Gadd45b, Nefl, Nr4a3, Nr4a2, Ptgs2, Rgs2, Rgs4, Rheb, Sgk1, Plk2, Yap1, Gadd45g, Spry2, Homer1, Ddx3y, Fbxw7, Tob2, Sap30, C9orf72, Errfi1, Rap2a, Ndel1, Tiparp, Inpp5f, Trib1, Arid5a, Kdm6b, Npas4, Ina,…
GO:0006355	regulation of transcription, DNA-templated	BP	3149	55	3.61694e-13	Arf4, Atf3, Bdnf, Btg2, Ccnk, Cdkn1b, Plk3, Egr1, Egr2, Egr3, Egr4, Fos, Fosb, Fosl2, Foxg1, Nr4a1, Ier2, Ifrd1, Ccn1, Jun, Junb, Jund, Klf4, Smad7, Maff, Cited2, Sik1, Ppp1r15a, Nfil3, Nr4a3, Nr4a2, Pcna, Per1, Rasd1, Sap18, Tsc22d1, Yap1, Sap30, Zfp869, Nop53, Rasl11a, Mlip, Dnajb1, Kti12, Spty2d1, Zfp957, Trib1, Arid5a, Csrnp1, Kdm6b, Npas4, Ciart, Dusp5, Irf2bp2, Mn1
GO:0060548	negative regulation of cell death	BP	1049	31	3.72394e-13	Arf4, Bdnf, Btg2, Casp3, Cdk11b, Cdkn1a, Cdkn1b, Plk3, Egr3, Nr4a1, Ccn1, Jun, Klf4, Cited2, Mt1, Nefl, Nr4a3, Nr4a2, Ptgs2, Dusp1, Scg2, Sgk1, Siah2, Plk2, Tsc22d1, Tpt1, Yap1, Spry2, Tnfrsf23, Ghsr, Irs2
GO:0032774	RNA biosynthetic process	BP	3258	56	3.94607e-13	Arf4, Atf3, Bdnf, Btg2, Ccnk, Cdkn1b, Plk3, Egr1, Egr2, Egr3, Egr4, Fos, Fosb, Fosl2, Foxg1, Nr4a1, Ier2, Ifrd1, Ccn1, Jun, Junb, Jund, Klf4, Smad7, Maff, Cited2, Sik1, Ppp1r15a, Nfil3, Nr4a3, Nr4a2, Pcna, Per1, Rasd1, Sap18, Tsc22d1, Yap1, Sap30, Zfp869, Nop53, Rasl11a, Mlip, Dnajb1, Taf13, Kti12, Spty2d1, Zfp957, Trib1, Arid5a, Csrnp1, Kdm6b, Npas4, Ciart, Dusp5, Irf2bp2, Mn1
GO:1903506	regulation of nucleic acid-templated transcription	BP	3156	55	3.95796e-13	Arf4, Atf3, Bdnf, Btg2, Ccnk, Cdkn1b, Plk3, Egr1, Egr2, Egr3, Egr4, Fos, Fosb, Fosl2, Foxg1, Nr4a1, Ier2, Ifrd1, Ccn1, Jun, Junb, Jund, Klf4, Smad7, Maff, Cited2, Sik1, Ppp1r15a, Nfil3, Nr4a3, Nr4a2, Pcna, Per1, Rasd1, Sap18, Tsc22d1, Yap1, Sap30, Zfp869, Nop53, Rasl11a, Mlip, Dnajb1, Kti12, Spty2d1, Zfp957, Trib1, Arid5a, Csrnp1, Kdm6b, Npas4, Ciart, Dusp5, Irf2bp2, Mn1
GO:2001141	regulation of RNA biosynthetic process	BP	3159	55	4.11343e-13	Arf4, Atf3, Bdnf, Btg2, Ccnk, Cdkn1b, Plk3, Egr1, Egr2, Egr3, Egr4, Fos, Fosb, Fosl2, Foxg1, Nr4a1, Ier2, Ifrd1, Ccn1, Jun, Junb, Jund, Klf4, Smad7, Maff, Cited2, Sik1, Ppp1r15a, Nfil3, Nr4a3, Nr4a2, Pcna, Per1, Rasd1, Sap18, Tsc22d1, Yap1, Sap30, Zfp869, Nop53, Rasl11a, Mlip, Dnajb1, Kti12, Spty2d1, Zfp957, Trib1, Arid5a, Csrnp1, Kdm6b, Npas4, Ciart, Dusp5, Irf2bp2, Mn1
GO:1901362	organic cyclic compound biosynthetic process	BP	3818	61	5.85337e-13	Arf4, Atf3, Bdnf, Btg2, Ccnk, Cdkn1a, Cdkn1b, Plk3, Egr1, Egr2, Egr3, Egr4, Fos, Fosb, Fosl2, Foxg1, Nr4a1, Ier2, Ifrd1, Ccn1, Jun, Junb, Jund, Klf4, Smad7, Maff, Cited2, Sik1, Ppp1r15a, Nfil3, Nr4a3, Nr4a2, Pcna, Per1, Dusp1, Rasd1, Sap18, Tsc22d1, Yap1, Impdh2, Tinf2, Sap30, Atp5d, Zfp869, Nop53, Rasl11a, Mlip, Dnajb1, Taf13, Kti12, Spty2d1, Zfp957, Trib1, Arid5a, Csrnp1, Kdm6b, Npas4, Ciart, D…
GO:0090304	nucleic acid metabolic process	BP	4605	68	6.37337e-13	Arf4, Atf3, Bdnf, Btg2, Ccnk, Cdk11b, Cdkn1a, Cdkn1b, Plk3, Egr1, Egr2, Egr3, Egr4, Fbl, Fos, Fosb, Fosl2, Foxg1, Nr4a1, Ier2, Ifrd1, Ccn1, Jun, Junb, Jund, Klf4, Smad7, Maff, Cited2, Sik1, Ppp1r15a, Nfil3, Nr4a3, Nr4a2, Pcna, Per1, Dusp1, Rasd1, Sap18, Tra2b, Snu13, Tsc22d1, Yap1, Tinf2, Sap30, Zfp869, Cwc25, Nop53, Rasl11a, Mlip, Dnajb1, Taf13, Kti12, Spty2d1, Zfp957, Eprs, Tyw3, Trib1, Tent5a,…
GO:0051239	regulation of multicellular organismal process	BP	3324	56	8.97201e-13	Adamts1, Arc, Areg, Bdnf, Bcl2l11, Btg1, Cdkn1b, Egr1, Egr2, Egr3, Fos, Gpr3, Foxg1, Ifrd1, Ccn1, Jun, Jund, Kcnj2, Klf4, Smad7, Maff, Cited2, Nefl, Nr4a3, Nr4a2, Per1, Ptgs2, Rgs2, Rgs4, Rheb, Sgk1, Plk2, Yap1, Gadd45g, Spry2, Homer1, Fbxw7, Nptx2, Tob2, Dusp6, Nop53, Mlip, Spaar, Errfi1, Rap2a, Ndel1, Inpp5f, Lrrtm2, Ghsr, Trib1, Arid5a, Kdm6b, Dusp5, Mir132, Mir212, Alkal2
GO:0032269	negative regulation of cellular protein metabolic process	BP	1026	30	1.22067e-12	Atf3, Btg2, Casp3, Cdkn1a, Cdkn1b, Nr4a1, Jun, Klf4, Smad7, Ppp1r15a, Gadd45b, Per1, Ptgs2, Dusp1, Rgs2, Siah2, Gadd45g, Spry2, Tinf2, Pard6a, Arpp19, Dusp6, Nop53, C9orf72, Errfi1, Inpp5f, Eprs, Trib1, Dusp5, Dusp4
GO:0060537	muscle tissue development	BP	466	21	1.37999e-12	Atf3, Bdnf, Btg2, Egr1, Egr2, Emd, Fos, Nr4a1, Ifrd1, Smad7, Maff, Cited2, Sik1, Rgs2, Rgs4, Yap1, Zfand5, Homer1, Sap30, Tiparp, Kdm6b
GO:0044267	cellular protein metabolic process	BP	4602	67	2.00011e-12	Areg, Arf4, Atf3, Bdnf, Bcl2l11, Btg1, Btg2, Casp3, Ccnk, Cdk11b, Cdkn1a, Cdkn1b, Plk3, Egr1, Egr2, Fbl, Nr4a1, Ccn1, Jun, Klf4, Smad7, Sik1, Ppp1r15a, Gadd45b, Per1, Piga, Ptgs2, Dusp1, Ranbp2, Rgs2, Rpl21, Rpl9, Scg2, Sgk1, Siah2, St8sia4, Plk2, Ubc, Gadd45g, Spry2, B3galt2, Tinf2, Fbxw7, Rassf1, Pard6a, Pmaip1, Arpp19, Wdr45b, Dusp6, Rpl22l1, Nop53, Fbxo33, Otud1, C9orf72, Errfi1, Josd1, Rap2a…
GO:0001228	DNA-binding transcription activator activity, RNA polymer...	MF	535	22	2.3912e-12	Atf3, Egr1, Egr2, Egr3, Egr4, Fos, Fosb, Fosl2, Nr4a1, Ier2, Jun, Junb, Jund, Klf4, Smad7, Maff, Nr4a3, Nr4a2, Tsc22d1, Zfp957, Csrnp1, Npas4
GO:0006366	transcription by RNA polymerase II	BP	2405	46	2.43929e-12	Arf4, Atf3, Btg2, Ccnk, Plk3, Egr1, Egr2, Egr3, Egr4, Fos, Fosb, Fosl2, Foxg1, Nr4a1, Ier2, Ifrd1, Ccn1, Jun, Junb, Jund, Klf4, Smad7, Maff, Cited2, Sik1, Ppp1r15a, Nfil3, Nr4a3, Nr4a2, Pcna, Per1, Tsc22d1, Yap1, Sap30, Zfp869, Nop53, Mlip, Dnajb1, Taf13, Kti12, Zfp957, Arid5a, Csrnp1, Kdm6b, Npas4, Irf2bp2
GO:0001216	DNA-binding transcription activator activity	MF	538	22	2.66859e-12	Atf3, Egr1, Egr2, Egr3, Egr4, Fos, Fosb, Fosl2, Nr4a1, Ier2, Jun, Junb, Jund, Klf4, Smad7, Maff, Nr4a3, Nr4a2, Tsc22d1, Zfp957, Csrnp1, Npas4
GO:0097159	organic cyclic compound binding	MF	5344	73	2.81097e-12	Arc, Arf4, Atf3, Auh, Cdk11b, Cenpa, Plk3, Egr1, Egr2, Egr3, Egr4, Fbl, Fos, Fosb, Fosl2, Foxg1, Nr4a1, Ier2, Jun, Junb, Jund, Klf4, Smad7, Maff, Sik1, Nfil3, Nr4a3, Nr4a2, Pcna, Per1, Ptgs2, Ranbp2, Rasd1, Rheb, Rpl9, Sgk1, Tra2b, Slc16a1, Plk2, Srp14, Snu13, Tsc22d1, Yap1, Zfand5, Impdh2, Ddx3y, Tinf2, Hspa14, Aldh1a3, Sap30, Zfp869, Rpl22l1, Nop53, Rasl11a, Rasl11b, Arl5b, Rap2a, Arl4d, Taf13,…
GO:1901363	heterocyclic compound binding	MF	5243	72	3.3619e-12	Arc, Arf4, Atf3, Auh, Cdk11b, Cenpa, Plk3, Egr1, Egr2, Egr3, Egr4, Fbl, Fos, Fosb, Fosl2, Foxg1, Nr4a1, Ier2, Jun, Junb, Jund, Klf4, Smad7, Maff, Sik1, Nfil3, Nr4a3, Nr4a2, Pcna, Per1, Ptgs2, Ranbp2, Rasd1, Rheb, Rpl9, Sgk1, Tra2b, Plk2, Srp14, Snu13, Tsc22d1, Yap1, Zfand5, Impdh2, Ddx3y, Tinf2, Hspa14, Aldh1a3, Sap30, Zfp869, Rpl22l1, Nop53, Rasl11a, Rasl11b, Arl5b, Rap2a, Arl4d, Taf13, Tiparp, …
GO:0006139	nucleobase-containing compound metabolic process	BP	5025	70	4.07552e-12	Arf4, Atf3, Bdnf, Btg2, Ccnk, Cdk11b, Cdkn1a, Cdkn1b, Plk3, Egr1, Egr2, Egr3, Egr4, Fbl, Fos, Fosb, Fosl2, Foxg1, Nr4a1, Ier2, Ifrd1, Ccn1, Jun, Junb, Jund, Klf4, Smad7, Maff, Cited2, Sik1, Ppp1r15a, Nfil3, Nr4a3, Nr4a2, Pcna, Per1, Dusp1, Rasd1, Sap18, Tra2b, Snu13, Tsc22d1, Yap1, Impdh2, Tinf2, Sap30, Atp5d, Zfp869, Cwc25, Nop53, Rasl11a, Mlip, Dnajb1, Taf13, Kti12, Spty2d1, Zfp957, Eprs, Tyw3,…
GO:0051248	negative regulation of protein metabolic process	BP	1077	30	4.10949e-12	Atf3, Btg2, Casp3, Cdkn1a, Cdkn1b, Nr4a1, Jun, Klf4, Smad7, Ppp1r15a, Gadd45b, Per1, Ptgs2, Dusp1, Rgs2, Siah2, Gadd45g, Spry2, Tinf2, Pard6a, Arpp19, Dusp6, Nop53, C9orf72, Errfi1, Inpp5f, Eprs, Trib1, Dusp5, Dusp4
GO:0006357	regulation of transcription by RNA polymerase II	BP	2349	45	4.25961e-12	Arf4, Atf3, Btg2, Ccnk, Plk3, Egr1, Egr2, Egr3, Egr4, Fos, Fosb, Fosl2, Foxg1, Nr4a1, Ier2, Ifrd1, Ccn1, Jun, Junb, Jund, Klf4, Smad7, Maff, Cited2, Sik1, Ppp1r15a, Nfil3, Nr4a3, Nr4a2, Pcna, Per1, Tsc22d1, Yap1, Sap30, Zfp869, Nop53, Mlip, Dnajb1, Kti12, Zfp957, Arid5a, Csrnp1, Kdm6b, Npas4, Irf2bp2
GO:0046483	heterocycle metabolic process	BP	5159	71	4.69449e-12	Arf4, Atf3, Bdnf, Btg2, Ccnk, Cdk11b, Cdkn1a, Cdkn1b, Plk3, Egr1, Egr2, Egr3, Egr4, Fbl, Fos, Fosb, Fosl2, Foxg1, Nr4a1, Ier2, Ifrd1, Ccn1, Jun, Junb, Jund, Klf4, Smad7, Maff, Cited2, Sik1, Ppp1r15a, Nfil3, Nr4a3, Nr4a2, Pcna, Per1, Dusp1, Rasd1, Sap18, Tra2b, Snu13, Tsc22d1, Yap1, Impdh2, Tinf2, Sap30, Atp5d, Zfp869, Cwc25, Nop53, Rasl11a, Mlip, Dnajb1, Taf13, Kti12, Spty2d1, Zfp957, Eprs, Tyw3,…
GO:0051348	negative regulation of transferase activity	BP	257	16	6.03869e-12	Casp3, Cdkn1a, Cdkn1b, Smad7, Gadd45b, Dusp1, Rgs2, Gadd45g, Spry2, Midn, Dusp6, Errfi1, Trib1, Dusp5, Dusp4, Irs2
GO:0042325	regulation of phosphorylation	BP	1573	36	6.64347e-12	Areg, Atf3, Bdnf, Casp3, Ccnk, Cdkn1a, Cdkn1b, Egr1, Ccn1, Jun, Klf4, Smad7, Ppp1r15a, Gadd45b, Per1, Ptgs2, Dusp1, Ranbp2, Rgs2, Gadd45g, Spry2, Fbxw7, Pard6a, Midn, Dusp6, Nop53, C9orf72, Errfi1, Rap2a, Tnfrsf23, Inpp5f, Trib1, Dusp5, Dusp4, Irs2, Alkal2
GO:0016310	phosphorylation	BP	2199	43	7.37559e-12	Areg, Atf3, Bdnf, Casp3, Ccnk, Cdk11b, Cdkn1a, Cdkn1b, Plk3, Egr1, Ccn1, Jun, Klf4, Smad7, Sik1, Ppp1r15a, Gadd45b, Per1, Ptgs2, Dusp1, Ranbp2, Rgs2, Scg2, Sgk1, Plk2, Gadd45g, Spry2, Fbxw7, Pard6a, Midn, Atp5d, Dusp6, Nop53, C9orf72, Errfi1, Rap2a, Tnfrsf23, Inpp5f, Trib1, Dusp5, Dusp4, Irs2, Alkal2
GO:0006468	protein phosphorylation	BP	1851	39	9.31699e-12	Areg, Atf3, Bdnf, Casp3, Ccnk, Cdk11b, Cdkn1a, Cdkn1b, Plk3, Egr1, Ccn1, Jun, Klf4, Smad7, Sik1, Ppp1r15a, Gadd45b, Per1, Ptgs2, Dusp1, Rgs2, Scg2, Sgk1, Plk2, Gadd45g, Spry2, Fbxw7, Pard6a, Dusp6, Nop53, C9orf72, Errfi1, Rap2a, Tnfrsf23, Inpp5f, Trib1, Dusp5, Dusp4, Alkal2
GO:0006725	cellular aromatic compound metabolic process	BP	5239	71	9.8322e-12	Arf4, Atf3, Bdnf, Btg2, Ccnk, Cdk11b, Cdkn1a, Cdkn1b, Plk3, Egr1, Egr2, Egr3, Egr4, Fbl, Fos, Fosb, Fosl2, Foxg1, Nr4a1, Ier2, Ifrd1, Ccn1, Jun, Junb, Jund, Klf4, Smad7, Maff, Cited2, Sik1, Ppp1r15a, Nfil3, Nr4a3, Nr4a2, Pcna, Per1, Dusp1, Rasd1, Sap18, Tra2b, Snu13, Tsc22d1, Yap1, Impdh2, Tinf2, Sap30, Atp5d, Zfp869, Cwc25, Nop53, Rasl11a, Mlip, Dnajb1, Taf13, Kti12, Spty2d1, Zfp957, Eprs, Tyw3,…
GO:0051179	localization	BP	5980	77	1.01699e-11	Adamts1, Arc, Arf4, Bdnf, Bcl2l11, Cdkn1a, Cdkn1b, Cenpa, Plk3, Egr1, Egr2, Egr3, Emd, Fbl, Fth1, Foxg1, Nr4a1, Ier2, Ccn1, Jun, Kcnj2, Klf4, Krt16, Smad7, Mest, Cited2, Sik1, Ppp1r15a, Nefl, Nr4a3, Nr4a2, Per1, Slc25a3, Ptgs2, Ptp4a1, Dusp1, Ranbp2, Rgs2, Rgs4, Scg2, Sgk1, Slc16a1, Plk2, Srp14, Zfand5, Spry2, Homer1, Tinf2, Hspa14, Fbxw7, Pvr, Nptx2, Grasp, Pard6a, Tulp2, Pmaip1, Midn, Atp5d, Wd…
GO:0010033	response to organic substance	BP	3009	51	1.05559e-11	Areg, Atf3, Bdnf, Casp3, Cdkn1b, Egr1, Egr2, Egr3, Emd, Fos, Fosl2, Nr4a1, Ier2, Ccn1, Jun, Klf4, Smad7, Mest, Cited2, Ppp1r15a, Nfil3, Nr4a3, Nr4a2, Pcna, Per1, Piga, Ptgs2, Dusp1, Rgs4, Sgk1, Tra2b, Slc16a1, Yap1, Impdh2, Spry2, Homer1, Hspa14, Rasl11b, Spaar, Ndel1, Tiparp, Eprs, Ghsr, Trib1, Arid5a, Npas4, Ina, Ovca2, Vgf, Irs2, Mir132
GO:0033673	negative regulation of kinase activity	BP	225	15	1.0672e-11	Casp3, Cdkn1a, Cdkn1b, Gadd45b, Dusp1, Rgs2, Gadd45g, Spry2, Midn, Dusp6, Errfi1, Trib1, Dusp5, Dusp4, Irs2
GO:0042127	regulation of cell population proliferation	BP	1693	37	1.22912e-11	Adamts1, Areg, Atf3, Bdnf, Btg1, Btg2, Casp3, Cdkn1a, Cdkn1b, Egr1, Egr3, Emd, Fosl2, Fth1, Foxg1, Nr4a1, Ccn1, Jun, Junb, Jund, Klf4, Smad7, Cited2, Nr4a3, Ptgs2, Dusp1, Scg2, Tsc22d1, Yap1, Spry2, Tinf2, Tob2, Pmaip1, Errfi1, Ghsr, Trib1, Irs2
GO:0005737	cytoplasm	CC	11029	113	1.44984e-11	Adamts1, Gla, Arc, Areg, Arf4, Auh, Bdnf, Bcl2l11, Btg1, Btg2, Casp3, Cdkn1a, Cdkn1b, Plk3, Egr1, Egr2, Emd, Fos, Fth1, Gpr3, Nr4a1, Ier2, Ifrd1, Jun, Kcnj2, Klf4, Smad7, Maff, Mest, Cited2, Sik1, Mt1, Ppp1r15a, Gadd45b, Nefl, Nr4a2, Per1, Slc25a3, Piga, Ptgs2, Ptp4a1, Dusp1, Ranbp2, Rasd1, Rgs2, Rgs4, Rheb, Rpl21, Rpl9, Sap18, Scg2, Sgk1, Siah2, St8sia4, Tra2b, Slc16a1, Plk2, Srp14, Tsc22d1, Tpt…
GO:0031981	nuclear lumen	CC	4114	61	1.45253e-11	Atf3, Bdnf, Ccnk, Cdk11b, Cdkn1a, Cdkn1b, Cenpa, Plk3, Egr1, Egr2, Egr3, Egr4, Emd, Fbl, Fos, Fosb, Fosl2, Foxg1, Nr4a1, Ier2, Jun, Junb, Jund, Klf4, Smad7, Maff, Cited2, Nr4a2, Pcna, Per1, Sap18, Sgk1, Siah2, Tra2b, Snu13, Tpt1, Ubc, Ddx3y, Tinf2, Fbxw7, Midn, Sap30, Chmp1b, Cwc25, Dusp6, Nop53, Rasl11a, Mlip, Dnajb1, Taf13, Spty2d1, Arid5a, Kdm6b, Npas4, Ythdc1, Ccdc174, Blvrb, Irf2bp2, H3c6, D…
GO:0023052	signaling	BP	6542	81	1.59064e-11	Arc, Areg, Arf4, Atf3, Bdnf, Bcl2l11, Casp3, Cdk11b, Cdkn1a, Cdkn1b, Plk3, Egr1, Egr3, Emd, Fos, Gpr3, Gpr19, Ccn1, Jun, Kcnj2, Klf4, Smad7, Cited2, Sik1, Mt1, Ppp1r15a, Gadd45b, Nr4a3, Nr4a2, Pcdh8, Per1, Ptgs2, Dusp1, Rasd1, Rgs2, Rgs4, Rheb, Scg2, Sgk1, Siah2, Slc16a1, Plk2, Tpt1, Yap1, Zfand5, Gadd45g, Spry2, Homer1, Fbxw7, Nptx2, Grasp, Rassf1, Aldh1a3, Pmaip1, Arpp19, Midn, Dusp6, Nop53, Ra…
GO:0031399	regulation of protein modification process	BP	1805	38	1.85512e-11	Areg, Atf3, Bdnf, Casp3, Ccnk, Cdkn1a, Cdkn1b, Egr1, Ccn1, Jun, Klf4, Smad7, Ppp1r15a, Gadd45b, Per1, Ptgs2, Dusp1, Rgs2, Siah2, Gadd45g, Spry2, Tinf2, Fbxw7, Rassf1, Pard6a, Arpp19, Dusp6, Nop53, C9orf72, Errfi1, Rap2a, Tnfrsf23, Inpp5f, Trib1, Arid5a, Dusp5, Dusp4, Alkal2
GO:0009966	regulation of signal transduction	BP	2861	49	2.10711e-11	Arc, Areg, Atf3, Bdnf, Bcl2l11, Cdk11b, Egr1, Emd, Gpr3, Ccn1, Jun, Klf4, Smad7, Cited2, Gadd45b, Nr4a2, Per1, Ptgs2, Dusp1, Rgs2, Rgs4, Rheb, Scg2, Siah2, Tpt1, Yap1, Gadd45g, Spry2, Homer1, Fbxw7, Nptx2, Aldh1a3, Pmaip1, Arpp19, Dusp6, Nop53, Rasl11b, Spaar, C9orf72, Errfi1, Rap2a, Tnfrsf23, Inpp5f, Ghsr, Trib1, Kctd12, Dusp5, Dusp4, Alkal2
GO:0065009	regulation of molecular function	BP	2562	46	2.12809e-11	Gla, Arc, Areg, Arf4, Bdnf, Bcl2l11, Btg1, Casp3, Cdkn1a, Cdkn1b, Egr1, Nr4a1, Ifrd1, Ccn1, Jun, Klf4, Smad7, Sik1, Ppp1r15a, Gadd45b, Nr4a2, Pcna, Ptgs2, Dusp1, Ranbp2, Rgs2, Rgs4, Siah2, Plk2, Gadd45g, Spry2, Homer1, Fbxw7, Nptx2, Pmaip1, Midn, Dusp6, C9orf72, Errfi1, Tnfrsf23, Dnajb1, Ndel1, Trib1, Dusp5, Dusp4, Irs2
GO:1901360	organic cyclic compound metabolic process	BP	5449	72	2.17482e-11	Arf4, Atf3, Bdnf, Btg2, Ccnk, Cdk11b, Cdkn1a, Cdkn1b, Plk3, Egr1, Egr2, Egr3, Egr4, Fbl, Fos, Fosb, Fosl2, Foxg1, Nr4a1, Ier2, Ifrd1, Ccn1, Jun, Junb, Jund, Klf4, Smad7, Maff, Cited2, Sik1, Ppp1r15a, Nfil3, Nr4a3, Nr4a2, Pcna, Per1, Dusp1, Rasd1, Sap18, Tra2b, Snu13, Tsc22d1, Yap1, Impdh2, Tinf2, Sap30, Atp5d, Zfp869, Cwc25, Nop53, Rasl11a, Mlip, Dnajb1, Taf13, Tiparp, Kti12, Spty2d1, Zfp957, Epr…
GO:0048513	animal organ development	BP	3497	55	2.31517e-11	Adamts1, Areg, Atf3, Bdnf, Bcl2l11, Btg2, Casp3, Cdkn1a, Cdkn1b, Egr1, Egr2, Egr3, Emd, Fos, Fosl2, Foxg1, Nr4a1, Ccn1, Jun, Junb, Klf4, Krt16, Smad7, Maff, Cited2, Sik1, Nr4a3, Nr4a2, Ptgs2, Rgs2, Rgs4, Rheb, Tra2b, Yap1, Zfand5, Gadd45g, Spry2, Homer1, Fbxw7, Aldh1a3, Tob2, Sap30, Dusp6, Errfi1, Ndel1, Tiparp, Ghsr, Trib1, Arid5a, Csrnp1, Kdm6b, Kif18a, Irf2bp2, Vgf, Irs2
GO:0019220	regulation of phosphate metabolic process	BP	1734	37	2.44548e-11	Areg, Atf3, Bdnf, Casp3, Ccnk, Cdkn1a, Cdkn1b, Egr1, Ccn1, Jun, Klf4, Smad7, Ppp1r15a, Gadd45b, Per1, Ptgs2, Dusp1, Ranbp2, Rgs2, Gadd45g, Spry2, Fbxw7, Pard6a, Arpp19, Midn, Dusp6, Nop53, C9orf72, Errfi1, Rap2a, Tnfrsf23, Inpp5f, Trib1, Dusp5, Dusp4, Irs2, Alkal2
GO:0007154	cell communication	BP	6597	81	2.47507e-11	Arc, Areg, Arf4, Atf3, Bdnf, Bcl2l11, Casp3, Cdk11b, Cdkn1a, Cdkn1b, Plk3, Egr1, Egr3, Emd, Fos, Gpr3, Gpr19, Ccn1, Jun, Klf4, Smad7, Cited2, Sik1, Mt1, Ppp1r15a, Gadd45b, Nr4a3, Nr4a2, Pcdh8, Per1, Ptgs2, Dusp1, Rasd1, Rgs2, Rgs4, Rheb, Scg2, Sgk1, Siah2, Slc16a1, Plk2, Tpt1, Yap1, Zfand5, Gadd45g, Spry2, Homer1, Fbxw7, Nptx2, Grasp, Rassf1, Aldh1a3, Pmaip1, Arpp19, Midn, Wdr45b, Dusp6, Nop53, R…
GO:0051174	regulation of phosphorus metabolic process	BP	1735	37	2.48618e-11	Areg, Atf3, Bdnf, Casp3, Ccnk, Cdkn1a, Cdkn1b, Egr1, Ccn1, Jun, Klf4, Smad7, Ppp1r15a, Gadd45b, Per1, Ptgs2, Dusp1, Ranbp2, Rgs2, Gadd45g, Spry2, Fbxw7, Pard6a, Arpp19, Midn, Dusp6, Nop53, C9orf72, Errfi1, Rap2a, Tnfrsf23, Inpp5f, Trib1, Dusp5, Dusp4, Irs2, Alkal2
GO:0050793	regulation of developmental process	BP	2778	48	2.64344e-11	Adamts1, Arc, Areg, Bdnf, Bcl2l11, Btg1, Ccnk, Cdkn1a, Cdkn1b, Egr1, Egr2, Egr3, Fos, Foxg1, Ifrd1, Ccn1, Jun, Junb, Jund, Klf4, Smad7, Maff, Cited2, Sik1, Nefl, Ptgs2, Rgs2, Rgs4, Rheb, Sgk1, Plk2, Tpt1, Yap1, Spry2, Fbxw7, Tob2, Dusp6, Spaar, Errfi1, Rap2a, Ndel1, Inpp5f, Lrrtm2, Ghsr, Trib1, Mir132, Mir212, Alkal2
GO:0051254	positive regulation of RNA metabolic process	BP	1654	36	2.7425e-11	Arf4, Atf3, Btg2, Ccnk, Egr1, Egr2, Egr3, Egr4, Fos, Fosb, Fosl2, Nr4a1, Ier2, Ifrd1, Ccn1, Jun, Junb, Jund, Klf4, Smad7, Maff, Cited2, Ppp1r15a, Nfil3, Nr4a3, Nr4a2, Per1, Tra2b, Tsc22d1, Yap1, Rasl11a, Zfp957, Arid5a, Csrnp1, Kdm6b, Npas4
GO:0014706	striated muscle tissue development	BP	443	19	3.97464e-11	Atf3, Bdnf, Btg2, Egr1, Egr2, Emd, Fos, Nr4a1, Ifrd1, Smad7, Maff, Cited2, Sik1, Rgs2, Rgs4, Yap1, Homer1, Sap30, Kdm6b
GO:0045595	regulation of cell differentiation	BP	1947	39	4.21909e-11	Adamts1, Arc, Areg, Bdnf, Btg1, Ccnk, Cdkn1b, Egr2, Egr3, Fos, Foxg1, Ifrd1, Ccn1, Jun, Junb, Jund, Klf4, Smad7, Maff, Sik1, Nefl, Ptgs2, Rgs2, Rgs4, Rheb, Sgk1, Plk2, Yap1, Spry2, Fbxw7, Tob2, Errfi1, Rap2a, Ndel1, Inpp5f, Trib1, Mir132, Mir212, Alkal2
GO:0010648	negative regulation of cell communication	BP	1346	32	4.45907e-11	Arc, Atf3, Bdnf, Cdk11b, Egr1, Emd, Klf4, Smad7, Nr4a2, Per1, Ptgs2, Dusp1, Rgs2, Rgs4, Scg2, Siah2, Plk2, Tpt1, Yap1, Spry2, Midn, Dusp6, Nop53, Rasl11b, Spaar, Errfi1, Tnfrsf23, Inpp5f, Ghsr, Trib1, Dusp5, Dusp4
GO:0023057	negative regulation of signaling	BP	1349	32	4.71922e-11	Arc, Atf3, Bdnf, Cdk11b, Egr1, Emd, Klf4, Smad7, Nr4a2, Per1, Ptgs2, Dusp1, Rgs2, Rgs4, Scg2, Siah2, Plk2, Tpt1, Yap1, Spry2, Midn, Dusp6, Nop53, Rasl11b, Spaar, Errfi1, Tnfrsf23, Inpp5f, Ghsr, Trib1, Dusp5, Dusp4
GO:0051726	regulation of cell cycle	BP	964	27	4.82624e-11	Adamts1, Bcl2l11, Btg1, Btg2, Casp3, Cdk11b, Cdkn1a, Cdkn1b, Plk3, Gpr3, Foxg1, Nr4a1, Jun, Junb, Jund, Klf4, Cited2, Sik1, Gadd45b, Nr4a3, Ptgs2, Sgk1, Plk2, Gadd45g, Rassf1, Chmp1b, Nop53
GO:0001932	regulation of protein phosphorylation	BP	1433	33	4.88292e-11	Areg, Atf3, Bdnf, Casp3, Ccnk, Cdkn1a, Cdkn1b, Egr1, Ccn1, Jun, Klf4, Smad7, Ppp1r15a, Gadd45b, Per1, Ptgs2, Dusp1, Rgs2, Gadd45g, Spry2, Fbxw7, Pard6a, Dusp6, Nop53, C9orf72, Errfi1, Rap2a, Tnfrsf23, Inpp5f, Trib1, Dusp5, Dusp4, Alkal2
GO:0008134	transcription factor binding	MF	696	23	5.99471e-11	Egr1, Egr2, Fbl, Fos, Nr4a1, Ifrd1, Jun, Junb, Jund, Klf4, Smad7, Cited2, Sik1, Nr4a3, Nr4a2, Pcna, Per1, Tpt1, Yap1, Tob2, Taf13, Trib1, Arid5a
GO:0098772	molecular function regulator	MF	3478	54	6.13579e-11	Areg, Atf3, Bdnf, Btg2, Casp3, Ccnk, Cdkn1a, Cdkn1b, Egr1, Egr2, Egr3, Egr4, Fos, Fosb, Fosl2, Foxg1, Nr4a1, Ier2, Jun, Junb, Jund, Klf4, Smad7, Maff, Cited2, Ppp1r15a, Nfil3, Nr4a3, Nr4a2, Pcna, Ranbp2, Rgs2, Rgs4, Scg2, Sgk1, Tsc22d1, Yap1, Spry2, Fbxw7, Tob2, Arpp19, Sap30, Zfp869, Mlip, C9orf72, Dnajb1, Zfp957, Trib1, Arid5a, Csrnp1, Npas4, Irf2bp2, Vgf, Alkal2
GO:0019899	enzyme binding	MF	2358	43	6.93828e-11	Bcl2l11, Btg1, Casp3, Ccnk, Cdkn1a, Cdkn1b, Egr1, Egr2, Fbl, Jun, Jund, Klf4, Smad7, Cited2, Sik1, Ppp1r15a, Nefl, Nr4a3, Pcna, Per1, Ptgs2, Dusp1, Ranbp2, Rheb, Sgk1, Siah2, Snu13, Ubc, Spry2, Fbxw7, Grasp, Pard6a, Midn, Dusp6, C9orf72, Errfi1, Dnajb1, Eprs, Trib1, Dusp5, Dusp4, Irs2, Alkal2
GO:0031328	positive regulation of cellular biosynthetic process	BP	1889	38	6.96515e-11	Arf4, Atf3, Ccnk, Egr1, Egr2, Egr3, Egr4, Fos, Fosb, Fosl2, Nr4a1, Ier2, Ifrd1, Ccn1, Jun, Junb, Jund, Klf4, Smad7, Maff, Cited2, Ppp1r15a, Nfil3, Nr4a3, Nr4a2, Pcna, Per1, Ptgs2, Tsc22d1, Yap1, Arpp19, Rasl11a, Zfp957, Arid5a, Csrnp1, Kdm6b, Npas4, Irs2
GO:0032268	regulation of cellular protein metabolic process	BP	2557	45	7.20402e-11	Areg, Atf3, Bdnf, Bcl2l11, Btg2, Casp3, Ccnk, Cdkn1a, Cdkn1b, Plk3, Egr1, Nr4a1, Ccn1, Jun, Klf4, Smad7, Ppp1r15a, Gadd45b, Per1, Ptgs2, Dusp1, Rgs2, Siah2, Plk2, Gadd45g, Spry2, Tinf2, Fbxw7, Rassf1, Pard6a, Pmaip1, Arpp19, Dusp6, Nop53, C9orf72, Errfi1, Rap2a, Tnfrsf23, Inpp5f, Eprs, Trib1, Arid5a, Dusp5, Dusp4, Alkal2
GO:0045893	positive regulation of transcription, DNA-templated	BP	1549	34	8.54283e-11	Arf4, Atf3, Ccnk, Egr1, Egr2, Egr3, Egr4, Fos, Fosb, Fosl2, Nr4a1, Ier2, Ifrd1, Ccn1, Jun, Junb, Jund, Klf4, Smad7, Maff, Cited2, Ppp1r15a, Nfil3, Nr4a3, Nr4a2, Per1, Tsc22d1, Yap1, Rasl11a, Zfp957, Arid5a, Csrnp1, Kdm6b, Npas4
GO:0070013	intracellular organelle lumen	CC	4525	63	8.59574e-11	Atf3, Bdnf, Ccnk, Cdk11b, Cdkn1a, Cdkn1b, Cenpa, Plk3, Egr1, Egr2, Egr3, Egr4, Emd, Fbl, Fos, Fosb, Fosl2, Fth1, Foxg1, Nr4a1, Ier2, Jun, Junb, Jund, Klf4, Smad7, Maff, Cited2, Nr4a2, Pcna, Per1, Sap18, Sgk1, Siah2, Tra2b, Snu13, Tpt1, Ubc, Ddx3y, Tinf2, Fbxw7, Grasp, Midn, Sap30, Chmp1b, Cwc25, Dusp6, Nop53, Rasl11a, Mlip, Dnajb1, Taf13, Spty2d1, Arid5a, Kdm6b, Npas4, Ythdc1, Ccdc174, Blvrb, Irf…
GO:0031974	membrane-enclosed lumen	CC	4526	63	8.67641e-11	Atf3, Bdnf, Ccnk, Cdk11b, Cdkn1a, Cdkn1b, Cenpa, Plk3, Egr1, Egr2, Egr3, Egr4, Emd, Fbl, Fos, Fosb, Fosl2, Fth1, Foxg1, Nr4a1, Ier2, Jun, Junb, Jund, Klf4, Smad7, Maff, Cited2, Nr4a2, Pcna, Per1, Sap18, Sgk1, Siah2, Tra2b, Snu13, Tpt1, Ubc, Ddx3y, Tinf2, Fbxw7, Grasp, Midn, Sap30, Chmp1b, Cwc25, Dusp6, Nop53, Rasl11a, Mlip, Dnajb1, Taf13, Spty2d1, Arid5a, Kdm6b, Npas4, Ythdc1, Ccdc174, Blvrb, Irf…
GO:0043233	organelle lumen	CC	4526	63	8.67641e-11	Atf3, Bdnf, Ccnk, Cdk11b, Cdkn1a, Cdkn1b, Cenpa, Plk3, Egr1, Egr2, Egr3, Egr4, Emd, Fbl, Fos, Fosb, Fosl2, Fth1, Foxg1, Nr4a1, Ier2, Jun, Junb, Jund, Klf4, Smad7, Maff, Cited2, Nr4a2, Pcna, Per1, Sap18, Sgk1, Siah2, Tra2b, Snu13, Tpt1, Ubc, Ddx3y, Tinf2, Fbxw7, Grasp, Midn, Sap30, Chmp1b, Cwc25, Dusp6, Nop53, Rasl11a, Mlip, Dnajb1, Taf13, Spty2d1, Arid5a, Kdm6b, Npas4, Ythdc1, Ccdc174, Blvrb, Irf…
GO:1903508	positive regulation of nucleic acid-templated transcripti...	BP	1552	34	8.99155e-11	Arf4, Atf3, Ccnk, Egr1, Egr2, Egr3, Egr4, Fos, Fosb, Fosl2, Nr4a1, Ier2, Ifrd1, Ccn1, Jun, Junb, Jund, Klf4, Smad7, Maff, Cited2, Ppp1r15a, Nfil3, Nr4a3, Nr4a2, Per1, Tsc22d1, Yap1, Rasl11a, Zfp957, Arid5a, Csrnp1, Kdm6b, Npas4
GO:1902680	positive regulation of RNA biosynthetic process	BP	1553	34	9.14603e-11	Arf4, Atf3, Ccnk, Egr1, Egr2, Egr3, Egr4, Fos, Fosb, Fosl2, Nr4a1, Ier2, Ifrd1, Ccn1, Jun, Junb, Jund, Klf4, Smad7, Maff, Cited2, Ppp1r15a, Nfil3, Nr4a3, Nr4a2, Per1, Tsc22d1, Yap1, Rasl11a, Zfp957, Arid5a, Csrnp1, Kdm6b, Npas4
GO:0045935	positive regulation of nucleobase-containing compound met...	BP	1822	37	9.9736e-11	Arf4, Atf3, Btg2, Ccnk, Egr1, Egr2, Egr3, Egr4, Fos, Fosb, Fosl2, Nr4a1, Ier2, Ifrd1, Ccn1, Jun, Junb, Jund, Klf4, Smad7, Maff, Cited2, Ppp1r15a, Nfil3, Nr4a3, Nr4a2, Pcna, Per1, Tra2b, Tsc22d1, Yap1, Rasl11a, Zfp957, Arid5a, Csrnp1, Kdm6b, Npas4
GO:0008283	cell population proliferation	BP	2013	39	1.12518e-10	Adamts1, Areg, Atf3, Bdnf, Btg1, Btg2, Casp3, Cdkn1a, Cdkn1b, Egr1, Egr3, Emd, Fosl2, Fth1, Foxg1, Nr4a1, Ccn1, Jun, Junb, Jund, Klf4, Smad7, Cited2, Nr4a3, Ptgs2, Dusp1, Scg2, Tsc22d1, Yap1, Impdh2, Spry2, Tinf2, Tob2, Pmaip1, Errfi1, Ndel1, Ghsr, Trib1, Irs2
GO:0003676	nucleic acid binding	MF	3322	52	1.17347e-10	Arc, Atf3, Auh, Cenpa, Egr1, Egr2, Egr3, Egr4, Fbl, Fos, Fosb, Fosl2, Foxg1, Nr4a1, Ier2, Jun, Junb, Jund, Klf4, Smad7, Maff, Nfil3, Nr4a3, Nr4a2, Pcna, Per1, Ranbp2, Rpl9, Tra2b, Srp14, Snu13, Tsc22d1, Yap1, Zfand5, Impdh2, Ddx3y, Tinf2, Sap30, Zfp869, Rpl22l1, Nop53, Taf13, Tiparp, Spty2d1, Zfp957, Eprs, Arid5a, Csrnp1, Kdm6b, Npas4, Ciart, Ythdc1
GO:0048583	regulation of response to stimulus	BP	3873	57	1.20274e-10	Arc, Areg, Atf3, Bdnf, Bcl2l11, Cdk11b, Egr1, Emd, Gpr3, Ccn1, Jun, Klf4, Smad7, Cited2, Ppp1r15a, Gadd45b, Nr4a3, Nr4a2, Pcna, Per1, Ptgs2, Dusp1, Rgs2, Rgs4, Rheb, Scg2, Siah2, Plk2, Tpt1, Yap1, Gadd45g, Spry2, Homer1, Fbxw7, Nptx2, Aldh1a3, Pmaip1, Arpp19, Dusp6, Nop53, Rasl11b, Mlip, Spaar, C9orf72, Errfi1, C2cd4b, Rap2a, Tnfrsf23, Ndel1, Inpp5f, Ghsr, Trib1, Arid5a, Kctd12, Dusp5, Dusp4, Alk…
GO:0072359	circulatory system development	BP	1161	29	1.29225e-10	Adamts1, Btg1, Casp3, Cdkn1a, Cdkn1b, Egr1, Egr3, Nr4a1, Ccn1, Jun, Junb, Klf4, Smad7, Cited2, Sik1, Ptgs2, Rgs2, Rgs4, Scg2, Plk2, Yap1, Zfand5, Spry2, Fbxw7, Dusp6, Errfi1, Tiparp, Ghsr, Kdm6b
GO:0019538	protein metabolic process	BP	5167	68	1.30231e-10	Adamts1, Areg, Arf4, Atf3, Bdnf, Bcl2l11, Btg1, Btg2, Casp3, Ccnk, Cdk11b, Cdkn1a, Cdkn1b, Plk3, Egr1, Egr2, Fbl, Nr4a1, Ccn1, Jun, Klf4, Smad7, Sik1, Ppp1r15a, Gadd45b, Per1, Piga, Ptgs2, Dusp1, Ranbp2, Rgs2, Rpl21, Rpl9, Scg2, Sgk1, Siah2, St8sia4, Plk2, Ubc, Gadd45g, Spry2, B3galt2, Tinf2, Fbxw7, Rassf1, Pard6a, Pmaip1, Arpp19, Wdr45b, Dusp6, Rpl22l1, Nop53, Fbxo33, Otud1, C9orf72, Errfi1, Jos…
GO:0005654	nucleoplasm	CC	3332	52	1.30868e-10	Atf3, Bdnf, Ccnk, Cdk11b, Cdkn1a, Cdkn1b, Cenpa, Egr1, Egr2, Emd, Fbl, Fos, Fosb, Fosl2, Foxg1, Nr4a1, Ier2, Jun, Junb, Jund, Klf4, Smad7, Maff, Nr4a2, Pcna, Per1, Sap18, Sgk1, Siah2, Tra2b, Tpt1, Ubc, Ddx3y, Tinf2, Fbxw7, Sap30, Chmp1b, Cwc25, Dusp6, Nop53, Mlip, Dnajb1, Taf13, Spty2d1, Arid5a, Kdm6b, Ythdc1, Ccdc174, Blvrb, Irf2bp2, Dusp4, Sap18b
GO:0016043	cellular component organization	BP	5914	74	1.34745e-10	Adamts1, Arc, Areg, Arf4, Bdnf, Bcl2l11, Btg2, Casp3, Cdk11b, Cdkn1a, Cdkn1b, Cenpa, Plk3, Egr2, Fbl, Gpr3, Foxg1, Ifrd1, Ccn1, Jun, Kcnj2, Klf4, Krt16, Smad7, Ppp1r15a, Nefl, Nr4a3, Nr4a2, Pcdh8, Pcna, Per1, Rgs2, Rgs4, Rheb, Sgk1, Slc16a1, Plk2, Snu13, Yap1, Spry2, Homer1, Tinf2, Fbxw7, Rassf1, Pard6a, Aldh1a3, Nap1l5, Pmaip1, Atp5d, Wdr45b, Chmp1b, Nop53, C9orf72, Rap2a, Dnajb1, Ndel1, Inpp5f,…
GO:0009891	positive regulation of biosynthetic process	BP	1933	38	1.34971e-10	Arf4, Atf3, Ccnk, Egr1, Egr2, Egr3, Egr4, Fos, Fosb, Fosl2, Nr4a1, Ier2, Ifrd1, Ccn1, Jun, Junb, Jund, Klf4, Smad7, Maff, Cited2, Ppp1r15a, Nfil3, Nr4a3, Nr4a2, Pcna, Per1, Ptgs2, Tsc22d1, Yap1, Arpp19, Rasl11a, Zfp957, Arid5a, Csrnp1, Kdm6b, Npas4, Irs2
GO:0051246	regulation of protein metabolic process	BP	2711	46	1.40752e-10	Areg, Atf3, Bdnf, Bcl2l11, Btg2, Casp3, Ccnk, Cdkn1a, Cdkn1b, Plk3, Egr1, Nr4a1, Ccn1, Jun, Klf4, Smad7, Ppp1r15a, Gadd45b, Per1, Ptgs2, Dusp1, Rgs2, Siah2, Plk2, Gadd45g, Spry2, Tinf2, Fbxw7, Rassf1, Pard6a, Pmaip1, Arpp19, Dusp6, Nop53, C9orf72, Errfi1, Rap2a, Tnfrsf23, Tiparp, Inpp5f, Eprs, Trib1, Arid5a, Dusp5, Dusp4, Alkal2
GO:0035914	skeletal muscle cell differentiation	BP	87	10	1.53619e-10	Atf3, Btg2, Egr1, Egr2, Emd, Fos, Nr4a1, Maff, Cited2, Sap30
GO:0045944	positive regulation of transcription by RNA polymerase II	BP	1250	30	1.55754e-10	Arf4, Atf3, Egr1, Egr2, Egr3, Egr4, Fos, Fosb, Fosl2, Nr4a1, Ier2, Ifrd1, Ccn1, Jun, Junb, Jund, Klf4, Smad7, Maff, Cited2, Nr4a3, Nr4a2, Per1, Tsc22d1, Yap1, Zfp957, Arid5a, Csrnp1, Kdm6b, Npas4
GO:0006796	phosphate-containing compound metabolic process	BP	2926	48	1.57947e-10	Areg, Atf3, Bdnf, Casp3, Ccnk, Cdk11b, Cdkn1a, Cdkn1b, Plk3, Egr1, Ccn1, Jun, Klf4, Smad7, Sik1, Ppp1r15a, Gadd45b, Per1, Piga, Ptgs2, Ptp4a1, Dusp1, Ranbp2, Rgs2, Scg2, Sgk1, Plk2, Gadd45g, Impdh2, Spry2, Fbxw7, Pard6a, Arpp19, Midn, Atp5d, Dusp6, Nop53, C9orf72, Errfi1, Plpp6, Rap2a, Tnfrsf23, Inpp5f, Trib1, Dusp5, Dusp4, Irs2, Alkal2
GO:0009890	negative regulation of biosynthetic process	BP	1588	34	1.64532e-10	Gla, Atf3, Btg2, Cdkn1a, Cdkn1b, Plk3, Egr1, Foxg1, Jun, Klf4, Smad7, Cited2, Sik1, Ppp1r15a, Nfil3, Nr4a3, Nr4a2, Pcna, Per1, Dusp1, Rasd1, Rgs2, Tinf2, Sap30, Zfp869, Nop53, Mlip, Errfi1, Dnajb1, Eprs, Arid5a, Ciart, Dusp5, Irf2bp2
GO:0050790	regulation of catalytic activity	BP	1865	37	1.91798e-10	Gla, Areg, Arf4, Bcl2l11, Btg1, Casp3, Cdkn1a, Cdkn1b, Egr1, Nr4a1, Ccn1, Klf4, Smad7, Ppp1r15a, Gadd45b, Nr4a2, Pcna, Ptgs2, Dusp1, Ranbp2, Rgs2, Rgs4, Siah2, Gadd45g, Spry2, Fbxw7, Pmaip1, Midn, Dusp6, Errfi1, Tnfrsf23, Dnajb1, Ndel1, Trib1, Dusp5, Dusp4, Irs2
GO:0006793	phosphorus metabolic process	BP	2947	48	2.01387e-10	Areg, Atf3, Bdnf, Casp3, Ccnk, Cdk11b, Cdkn1a, Cdkn1b, Plk3, Egr1, Ccn1, Jun, Klf4, Smad7, Sik1, Ppp1r15a, Gadd45b, Per1, Piga, Ptgs2, Ptp4a1, Dusp1, Ranbp2, Rgs2, Scg2, Sgk1, Plk2, Gadd45g, Impdh2, Spry2, Fbxw7, Pard6a, Arpp19, Midn, Atp5d, Dusp6, Nop53, C9orf72, Errfi1, Plpp6, Rap2a, Tnfrsf23, Inpp5f, Trib1, Dusp5, Dusp4, Irs2, Alkal2
GO:0071310	cellular response to organic substance	BP	2346	42	2.14802e-10	Atf3, Bdnf, Casp3, Cdkn1b, Egr1, Egr2, Egr3, Emd, Fos, Nr4a1, Ccn1, Jun, Klf4, Smad7, Cited2, Ppp1r15a, Nfil3, Nr4a3, Nr4a2, Per1, Piga, Dusp1, Rgs4, Sgk1, Tra2b, Slc16a1, Yap1, Impdh2, Spry2, Hspa14, Rasl11b, Spaar, Ndel1, Tiparp, Eprs, Ghsr, Trib1, Arid5a, Npas4, Ina, Irs2, Mir132
GO:1901564	organonitrogen compound metabolic process	BP	5979	74	2.26638e-10	Adamts1, Gla, Areg, Arf4, Atf3, Auh, Bdnf, Bcl2l11, Btg1, Btg2, Casp3, Ccnk, Cdk11b, Cdkn1a, Cdkn1b, Plk3, Egr1, Egr2, Fbl, Nr4a1, Ccn1, Jun, Klf4, Smad7, Sik1, Ppp1r15a, Gadd45b, Nr4a2, Per1, Piga, Ptgs2, Dusp1, Ranbp2, Rgs2, Rpl21, Rpl9, Scg2, Sgk1, Siah2, St8sia4, Plk2, Ubc, Gadd45g, Impdh2, Spry2, B3galt2, Tinf2, Fbxw7, Rassf1, Pard6a, Pmaip1, Arpp19, Atp5d, Wdr45b, Dusp6, Rpl22l1, Nop53, Fbx…
GO:0010557	positive regulation of macromolecule biosynthetic process	BP	1786	36	2.29201e-10	Arf4, Atf3, Ccnk, Egr1, Egr2, Egr3, Egr4, Fos, Fosb, Fosl2, Nr4a1, Ier2, Ifrd1, Ccn1, Jun, Junb, Jund, Klf4, Smad7, Maff, Cited2, Ppp1r15a, Nfil3, Nr4a3, Nr4a2, Pcna, Per1, Tsc22d1, Yap1, Rasl11a, Zfp957, Arid5a, Csrnp1, Kdm6b, Npas4, Irs2
GO:1901700	response to oxygen-containing compound	BP	1538	33	3.01882e-10	Areg, Casp3, Plk3, Egr1, Egr2, Fos, Fosl2, Nr4a1, Jun, Klf4, Mest, Mt1, Nr4a3, Nr4a2, Per1, Ptgs2, Rgs4, Sgk1, Tra2b, Yap1, Homer1, Spaar, Ndel1, Eprs, Ghsr, Trib1, Arid5a, Kdm6b, Npas4, Ovca2, Vgf, Irs2, Mir132
GO:0031327	negative regulation of cellular biosynthetic process	BP	1546	33	3.44484e-10	Gla, Atf3, Btg2, Cdkn1a, Cdkn1b, Plk3, Egr1, Foxg1, Jun, Klf4, Smad7, Cited2, Sik1, Ppp1r15a, Nfil3, Nr4a3, Nr4a2, Pcna, Per1, Dusp1, Rasd1, Rgs2, Tinf2, Sap30, Zfp869, Nop53, Mlip, Dnajb1, Eprs, Arid5a, Ciart, Dusp5, Irf2bp2
GO:0043086	negative regulation of catalytic activity	BP	699	22	4.02012e-10	Gla, Casp3, Cdkn1a, Cdkn1b, Nr4a1, Klf4, Smad7, Ppp1r15a, Gadd45b, Ptgs2, Dusp1, Rgs2, Siah2, Gadd45g, Spry2, Midn, Dusp6, Errfi1, Trib1, Dusp5, Dusp4, Irs2
GO:2000113	negative regulation of cellular macromolecule biosyntheti...	BP	1472	32	4.22592e-10	Atf3, Btg2, Cdkn1a, Cdkn1b, Plk3, Egr1, Foxg1, Jun, Klf4, Smad7, Cited2, Sik1, Ppp1r15a, Nfil3, Nr4a3, Nr4a2, Pcna, Per1, Dusp1, Rasd1, Rgs2, Tinf2, Sap30, Zfp869, Nop53, Mlip, Dnajb1, Eprs, Arid5a, Ciart, Dusp5, Irf2bp2
GO:0045934	negative regulation of nucleobase-containing compound met...	BP	1479	32	4.75257e-10	Atf3, Btg2, Cdkn1a, Cdkn1b, Plk3, Egr1, Foxg1, Jun, Klf4, Smad7, Cited2, Sik1, Ppp1r15a, Nfil3, Nr4a3, Nr4a2, Pcna, Per1, Dusp1, Rasd1, Tra2b, Tinf2, Sap30, Zfp869, Nop53, Mlip, Dnajb1, Tent5a, Arid5a, Ciart, Dusp5, Irf2bp2
GO:0000987	cis-regulatory region sequence-specific DNA binding	MF	1070	27	4.82515e-10	Atf3, Egr1, Egr2, Egr3, Egr4, Fos, Fosb, Fosl2, Nr4a1, Jun, Junb, Jund, Klf4, Smad7, Maff, Nfil3, Nr4a3, Nr4a2, Per1, Tsc22d1, Yap1, Zfp869, Tiparp, Zfp957, Kdm6b, Npas4, Ciart
GO:0006469	negative regulation of protein kinase activity	BP	205	13	4.90318e-10	Casp3, Cdkn1a, Cdkn1b, Gadd45b, Dusp1, Rgs2, Gadd45g, Spry2, Dusp6, Errfi1, Trib1, Dusp5, Dusp4
GO:0010629	negative regulation of gene expression	BP	2032	38	5.5588e-10	Atf3, Btg2, Cdkn1a, Cdkn1b, Plk3, Egr1, Foxg1, Jun, Klf4, Smad7, Cited2, Sik1, Ppp1r15a, Nfil3, Nr4a3, Nr4a2, Pcna, Per1, Rasd1, Rgs2, Tra2b, Yap1, Fbxw7, Sap30, Zfp869, Nop53, Mlip, Errfi1, Dnajb1, Tiparp, Eprs, Ghsr, Tent5a, Arid5a, Ciart, Dusp5, Irf2bp2, H3c6
GO:0010942	positive regulation of cell death	BP	713	22	5.81564e-10	Atf3, Bcl2l11, Btg1, Casp3, Cdkn1a, Cdkn1b, Egr1, Fos, Nr4a1, Ccn1, Jun, Gadd45b, Nr4a3, Ptgs2, Dusp1, Tsc22d1, Gadd45g, Fbxw7, Aldh1a3, Pmaip1, Dusp6, Tnfrsf23
GO:0010558	negative regulation of macromolecule biosynthetic process	BP	1492	32	5.89939e-10	Atf3, Btg2, Cdkn1a, Cdkn1b, Plk3, Egr1, Foxg1, Jun, Klf4, Smad7, Cited2, Sik1, Ppp1r15a, Nfil3, Nr4a3, Nr4a2, Pcna, Per1, Dusp1, Rasd1, Rgs2, Tinf2, Sap30, Zfp869, Nop53, Mlip, Dnajb1, Eprs, Arid5a, Ciart, Dusp5, Irf2bp2
GO:0071840	cellular component organization or biogenesis	BP	6102	74	5.90715e-10	Adamts1, Arc, Areg, Arf4, Bdnf, Bcl2l11, Btg2, Casp3, Cdk11b, Cdkn1a, Cdkn1b, Cenpa, Plk3, Egr2, Fbl, Gpr3, Foxg1, Ifrd1, Ccn1, Jun, Kcnj2, Klf4, Krt16, Smad7, Ppp1r15a, Nefl, Nr4a3, Nr4a2, Pcdh8, Pcna, Per1, Rgs2, Rgs4, Rheb, Sgk1, Slc16a1, Plk2, Snu13, Yap1, Spry2, Homer1, Tinf2, Fbxw7, Rassf1, Pard6a, Aldh1a3, Nap1l5, Pmaip1, Atp5d, Wdr45b, Chmp1b, Nop53, C9orf72, Rap2a, Dnajb1, Ndel1, Inpp5f,…
GO:2000026	regulation of multicellular organismal development	BP	2233	40	6.2702e-10	Adamts1, Arc, Bdnf, Btg1, Cdkn1b, Egr1, Egr2, Egr3, Fos, Foxg1, Ifrd1, Ccn1, Jun, Klf4, Smad7, Maff, Cited2, Nefl, Ptgs2, Rgs2, Rgs4, Rheb, Sgk1, Plk2, Yap1, Spry2, Fbxw7, Tob2, Dusp6, Spaar, Errfi1, Rap2a, Ndel1, Inpp5f, Lrrtm2, Ghsr, Trib1, Mir132, Mir212, Alkal2
GO:0006950	response to stress	BP	3599	53	6.76388e-10	Atf3, Bdnf, Bcl2l11, Btg2, Casp3, Ccnk, Cdkn1a, Plk3, Egr1, Fos, Fosl2, Ccn1, Jun, Klf4, Krt16, Cited2, Sik1, Mt1, Ppp1r15a, Gadd45b, Nefl, Nr4a3, Nr4a2, Pcna, Per1, Ptgs2, Dusp1, Sgk1, Plk2, Tpt1, Yap1, Gadd45g, Hspa14, Fbxw7, Rassf1, Pmaip1, Wdr45b, Nop53, Mlip, Errfi1, C2cd4b, Rap2a, Tnfrsf23, Dnajb1, Ndel1, Inpp5f, Eprs, Ghsr, Trib1, Arid5a, Kdm6b, Npas4, Vgf
GO:0007165	signal transduction	BP	5998	73	7.09011e-10	Arc, Areg, Arf4, Atf3, Bdnf, Bcl2l11, Casp3, Cdk11b, Cdkn1a, Cdkn1b, Plk3, Egr1, Emd, Fos, Gpr3, Gpr19, Ccn1, Jun, Klf4, Smad7, Cited2, Sik1, Mt1, Ppp1r15a, Gadd45b, Nr4a3, Nr4a2, Per1, Ptgs2, Dusp1, Rasd1, Rgs2, Rgs4, Rheb, Scg2, Sgk1, Siah2, Plk2, Tpt1, Yap1, Zfand5, Gadd45g, Spry2, Homer1, Fbxw7, Nptx2, Grasp, Rassf1, Aldh1a3, Pmaip1, Arpp19, Dusp6, Nop53, Rasl11a, Rasl11b, Spaar, C9orf72, Err…
GO:0035556	intracellular signal transduction	BP	2445	42	7.54025e-10	Atf3, Bcl2l11, Casp3, Cdkn1a, Plk3, Gpr3, Ccn1, Jun, Klf4, Smad7, Sik1, Mt1, Gadd45b, Per1, Ptgs2, Dusp1, Rasd1, Rgs2, Rheb, Scg2, Sgk1, Plk2, Tpt1, Yap1, Gadd45g, Spry2, Fbxw7, Rassf1, Pmaip1, Arpp19, Dusp6, Nop53, Spaar, C9orf72, Errfi1, Rap2a, Tnfrsf23, Inpp5f, Trib1, Dusp5, Dusp4, Alkal2
GO:0048585	negative regulation of response to stimulus	BP	1601	33	8.33358e-10	Atf3, Bdnf, Cdk11b, Egr1, Emd, Klf4, Smad7, Ppp1r15a, Nr4a3, Nr4a2, Per1, Ptgs2, Dusp1, Rgs2, Rgs4, Scg2, Siah2, Plk2, Tpt1, Yap1, Spry2, Dusp6, Nop53, Rasl11b, Mlip, Spaar, Errfi1, Tnfrsf23, Inpp5f, Ghsr, Trib1, Dusp5, Dusp4
GO:0044092	negative regulation of molecular function	BP	1030	26	1.03727e-09	Gla, Casp3, Cdkn1a, Cdkn1b, Nr4a1, Jun, Klf4, Smad7, Sik1, Ppp1r15a, Gadd45b, Ptgs2, Dusp1, Rgs2, Siah2, Gadd45g, Spry2, Fbxw7, Midn, Dusp6, C9orf72, Errfi1, Trib1, Dusp5, Dusp4, Irs2
GO:0009968	negative regulation of signal transduction	BP	1196	28	1.18597e-09	Atf3, Bdnf, Cdk11b, Egr1, Emd, Klf4, Smad7, Nr4a2, Per1, Ptgs2, Dusp1, Rgs2, Rgs4, Scg2, Siah2, Tpt1, Yap1, Spry2, Dusp6, Nop53, Rasl11b, Spaar, Errfi1, Tnfrsf23, Inpp5f, Trib1, Dusp5, Dusp4
GO:0035976	transcription factor AP-1 complex	CC	4	4	1.35547e-09	Fos, Jun, Junb, Jund
GO:0000978	RNA polymerase II cis-regulatory region sequence-specific...	MF	1045	26	1.40324e-09	Atf3, Egr1, Egr2, Egr3, Egr4, Fos, Fosb, Fosl2, Nr4a1, Jun, Junb, Jund, Klf4, Smad7, Maff, Nfil3, Nr4a3, Nr4a2, Per1, Tsc22d1, Yap1, Zfp869, Zfp957, Kdm6b, Npas4, Ciart
GO:0140110	transcription regulator activity	MF	1744	34	1.85022e-09	Atf3, Btg2, Egr1, Egr2, Egr3, Egr4, Fos, Fosb, Fosl2, Foxg1, Nr4a1, Ier2, Jun, Junb, Jund, Klf4, Smad7, Maff, Cited2, Nfil3, Nr4a3, Nr4a2, Tsc22d1, Yap1, Tob2, Sap30, Zfp869, Mlip, Dnajb1, Zfp957, Arid5a, Csrnp1, Npas4, Irf2bp2
GO:0031099	regeneration	BP	148	11	2.06732e-09	Bdnf, Cdkn1a, Cdkn1b, Ifrd1, Jun, Klf4, Nefl, Yap1, Spaar, Ndel1, Inpp5f
GO:0043565	sequence-specific DNA binding	MF	1581	32	2.4282e-09	Atf3, Egr1, Egr2, Egr3, Egr4, Fos, Fosb, Fosl2, Foxg1, Nr4a1, Ier2, Jun, Junb, Jund, Klf4, Smad7, Maff, Nfil3, Nr4a3, Nr4a2, Per1, Tsc22d1, Yap1, Tinf2, Zfp869, Tiparp, Zfp957, Arid5a, Csrnp1, Kdm6b, Npas4, Ciart
GO:0003677	DNA binding	MF	2264	39	3.22842e-09	Atf3, Cenpa, Egr1, Egr2, Egr3, Egr4, Fos, Fosb, Fosl2, Foxg1, Nr4a1, Ier2, Jun, Junb, Jund, Klf4, Smad7, Maff, Nfil3, Nr4a3, Nr4a2, Pcna, Per1, Tsc22d1, Yap1, Zfand5, Impdh2, Tinf2, Sap30, Zfp869, Taf13, Tiparp, Spty2d1, Zfp957, Arid5a, Csrnp1, Kdm6b, Npas4, Ciart
GO:0043068	positive regulation of programmed cell death	BP	648	20	3.68082e-09	Atf3, Bcl2l11, Btg1, Casp3, Cdkn1a, Egr1, Nr4a1, Ccn1, Jun, Gadd45b, Nr4a3, Ptgs2, Dusp1, Tsc22d1, Gadd45g, Fbxw7, Aldh1a3, Pmaip1, Dusp6, Tnfrsf23
GO:0051128	regulation of cellular component organization	BP	2478	41	3.7529e-09	Adamts1, Arc, Arf4, Bdnf, Bcl2l11, Cdk11b, Cdkn1a, Cdkn1b, Gpr3, Ifrd1, Klf4, Smad7, Ppp1r15a, Nefl, Pcdh8, Rgs2, Rgs4, Rheb, Sgk1, Plk2, Spry2, Homer1, Tinf2, Fbxw7, Rassf1, Pmaip1, Chmp1b, Nop53, C9orf72, Rap2a, Dnajb1, Ndel1, Inpp5f, Spty2d1, Lrrtm2, Ghsr, Arid5a, Kif18a, Mir132, Mir212, Alkal2
GO:0007610	behavior	BP	726	21	4.5759e-09	Arc, Arf4, Bdnf, Btg2, Casp3, Egr1, Egr2, Jun, Nr4a3, Nr4a2, Ptgs2, Sgk1, Slc16a1, Plk2, Homer1, Nptx2, Aldh1a3, Inpp5f, Ghsr, Npas4, Ciart
GO:0051338	regulation of transferase activity	BP	874	23	4.77881e-09	Areg, Casp3, Cdkn1a, Cdkn1b, Egr1, Ccn1, Klf4, Smad7, Gadd45b, Pcna, Dusp1, Ranbp2, Rgs2, Gadd45g, Spry2, Fbxw7, Midn, Dusp6, Errfi1, Trib1, Dusp5, Dusp4, Irs2
GO:0010628	positive regulation of gene expression	BP	2303	39	5.18617e-09	Arf4, Atf3, Ccnk, Egr1, Egr2, Egr3, Egr4, Fos, Fosb, Fosl2, Nr4a1, Ier2, Ifrd1, Ccn1, Jun, Junb, Jund, Klf4, Smad7, Maff, Cited2, Ppp1r15a, Nfil3, Nr4a3, Nr4a2, Per1, Ptgs2, Tra2b, Tsc22d1, Yap1, Spry2, Nop53, Rasl11a, Zfp957, Tent5a, Arid5a, Csrnp1, Kdm6b, Npas4
GO:0003690	double-stranded DNA binding	MF	1546	31	5.5653e-09	Atf3, Egr1, Egr2, Egr3, Egr4, Fos, Fosb, Fosl2, Foxg1, Nr4a1, Ier2, Jun, Junb, Jund, Klf4, Smad7, Maff, Nfil3, Nr4a3, Nr4a2, Pcna, Per1, Tsc22d1, Yap1, Zfp869, Tiparp, Zfp957, Arid5a, Kdm6b, Npas4, Ciart
GO:0051253	negative regulation of RNA metabolic process	BP	1378	29	6.38461e-09	Atf3, Btg2, Cdkn1b, Plk3, Egr1, Foxg1, Jun, Klf4, Smad7, Cited2, Sik1, Ppp1r15a, Nfil3, Nr4a3, Nr4a2, Pcna, Per1, Rasd1, Tra2b, Sap30, Zfp869, Nop53, Mlip, Dnajb1, Tent5a, Arid5a, Ciart, Dusp5, Irf2bp2
GO:1990837	sequence-specific double-stranded DNA binding	MF	1466	30	6.40521e-09	Atf3, Egr1, Egr2, Egr3, Egr4, Fos, Fosb, Fosl2, Foxg1, Nr4a1, Ier2, Jun, Junb, Jund, Klf4, Smad7, Maff, Nfil3, Nr4a3, Nr4a2, Per1, Tsc22d1, Yap1, Zfp869, Tiparp, Zfp957, Arid5a, Kdm6b, Npas4, Ciart
GO:0007517	muscle organ development	BP	416	16	6.93693e-09	Atf3, Bdnf, Btg2, Egr1, Egr2, Emd, Fos, Nr4a1, Smad7, Maff, Cited2, Rgs2, Rgs4, Yap1, Homer1, Sap30
GO:0000976	transcription regulatory region sequence-specific DNA bin...	MF	1386	29	7.25659e-09	Atf3, Egr1, Egr2, Egr3, Egr4, Fos, Fosb, Fosl2, Nr4a1, Ier2, Jun, Junb, Jund, Klf4, Smad7, Maff, Nfil3, Nr4a3, Nr4a2, Per1, Tsc22d1, Yap1, Zfp869, Tiparp, Zfp957, Arid5a, Kdm6b, Npas4, Ciart
GO:0001067	regulatory region nucleic acid binding	MF	1390	29	7.73338e-09	Atf3, Egr1, Egr2, Egr3, Egr4, Fos, Fosb, Fosl2, Nr4a1, Ier2, Jun, Junb, Jund, Klf4, Smad7, Maff, Nfil3, Nr4a3, Nr4a2, Per1, Tsc22d1, Yap1, Zfp869, Tiparp, Zfp957, Arid5a, Kdm6b, Npas4, Ciart
GO:0009719	response to endogenous stimulus	BP	1395	29	8.37075e-09	Areg, Bdnf, Casp3, Egr1, Egr2, Egr3, Fos, Nr4a1, Ier2, Ccn1, Jun, Smad7, Cited2, Nr4a3, Nr4a2, Per1, Rgs4, Sgk1, Yap1, Spry2, Rasl11b, Spaar, Ndel1, Eprs, Ghsr, Arid5a, Npas4, Vgf, Irs2
GO:0019900	kinase binding	MF	830	22	9.3094e-09	Bcl2l11, Ccnk, Cdkn1a, Cdkn1b, Sik1, Ppp1r15a, Nr4a3, Pcna, Per1, Dusp1, Rheb, Sgk1, Spry2, Pard6a, Midn, Dusp6, Errfi1, Trib1, Dusp5, Dusp4, Irs2, Alkal2
GO:0009653	anatomical structure morphogenesis	BP	2777	43	1.02623e-08	Adamts1, Arc, Areg, Bdnf, Bcl2l11, Btg1, Egr2, Egr3, Foxg1, Nr4a1, Ifrd1, Ccn1, Jun, Junb, Klf4, Krt16, Smad7, Cited2, Nefl, Nr4a3, Nr4a2, Pcdh8, Ptgs2, Dusp1, Scg2, Sgk1, Plk2, Yap1, Zfand5, Spry2, Fbxw7, Aldh1a3, C9orf72, Errfi1, Rap2a, Ndel1, Tiparp, Ghsr, Csrnp1, Kdm6b, Dusp5, Dusp4, Frmd6
GO:0065008	regulation of biological quality	BP	4017	54	1.13876e-08	Arc, Arf4, Bdnf, Bcl2l11, Casp3, Egr1, Fth1, Gpr3, Ifrd1, Jun, Kcnj2, Krt16, Smad7, Mest, Cited2, Mt1, Ppp1r15a, Nefl, Nr4a3, Pcdh8, Pcna, Ptgs2, Rgs2, Rgs4, Rheb, Sgk1, Tra2b, Slc16a1, Plk2, Yap1, Gadd45g, Homer1, Tinf2, Fbxw7, Nptx2, Grasp, Rassf1, Aldh1a3, Pmaip1, Midn, Nop53, C2cd4b, Tnfrsf23, Ndel1, Tiparp, Lrrtm2, Ghsr, Tent5a, Kdm6b, Npas4, Dusp5, Vgf, Irs2, Mir132
GO:0061061	muscle structure development	BP	699	20	1.3072e-08	Atf3, Bdnf, Btg1, Btg2, Egr1, Egr2, Emd, Fos, Nr4a1, Ifrd1, Smad7, Maff, Cited2, Sik1, Rgs2, Rgs4, Yap1, Homer1, Sap30, Kdm6b
GO:0007399	nervous system development	BP	2385	39	1.35354e-08	Adamts1, Arc, Areg, Arf4, Bdnf, Btg2, Casp3, Egr2, Egr3, Fos, Foxg1, Ier2, Ifrd1, Jun, Klf4, Cited2, Nefl, Nr4a3, Nr4a2, Rgs2, Rheb, Sgk1, Tra2b, Plk2, Yap1, Aldh1a3, C9orf72, Rap2a, Ndel1, Inpp5f, Lrrtm2, Ghsr, Kdm6b, Npas4, Ina, Irs2, Mir132, Mir212, Alkal2
GO:0006928	movement of cell or subcellular component	BP	2086	36	1.39811e-08	Adamts1, Arc, Arf4, Bdnf, Cdkn1b, Egr1, Egr2, Egr3, Foxg1, Nr4a1, Ier2, Ccn1, Jun, Kcnj2, Klf4, Krt16, Cited2, Nefl, Nr4a3, Nr4a2, Ptgs2, Ptp4a1, Dusp1, Scg2, Plk2, Zfand5, Spry2, Fbxw7, Pvr, Rap2a, Ndel1, Inpp5f, Trib1, Kif18a, Frmd6, Irs2
GO:0001944	vasculature development	BP	775	21	1.41862e-08	Adamts1, Btg1, Egr1, Egr3, Nr4a1, Ccn1, Jun, Junb, Klf4, Smad7, Cited2, Ptgs2, Scg2, Plk2, Yap1, Zfand5, Spry2, Fbxw7, Errfi1, Tiparp, Ghsr
GO:0043065	positive regulation of apoptotic process	BP	643	19	1.8513e-08	Atf3, Bcl2l11, Btg1, Casp3, Egr1, Nr4a1, Ccn1, Jun, Gadd45b, Nr4a3, Ptgs2, Dusp1, Tsc22d1, Gadd45g, Fbxw7, Aldh1a3, Pmaip1, Dusp6, Tnfrsf23
GO:0045892	negative regulation of transcription, DNA-templated	BP	1273	27	1.92203e-08	Atf3, Btg2, Cdkn1b, Plk3, Egr1, Foxg1, Jun, Klf4, Smad7, Cited2, Sik1, Ppp1r15a, Nfil3, Nr4a3, Nr4a2, Pcna, Per1, Rasd1, Sap30, Zfp869, Nop53, Mlip, Dnajb1, Arid5a, Ciart, Dusp5, Irf2bp2
GO:1903507	negative regulation of nucleic acid-templated transcripti...	BP	1277	27	2.05045e-08	Atf3, Btg2, Cdkn1b, Plk3, Egr1, Foxg1, Jun, Klf4, Smad7, Cited2, Sik1, Ppp1r15a, Nfil3, Nr4a3, Nr4a2, Pcna, Per1, Rasd1, Sap30, Zfp869, Nop53, Mlip, Dnajb1, Arid5a, Ciart, Dusp5, Irf2bp2
GO:1902679	negative regulation of RNA biosynthetic process	BP	1278	27	2.08378e-08	Atf3, Btg2, Cdkn1b, Plk3, Egr1, Foxg1, Jun, Klf4, Smad7, Cited2, Sik1, Ppp1r15a, Nfil3, Nr4a3, Nr4a2, Pcna, Per1, Rasd1, Sap30, Zfp869, Nop53, Mlip, Dnajb1, Arid5a, Ciart, Dusp5, Irf2bp2
GO:0031175	neuron projection development	BP	1109	25	2.10286e-08	Adamts1, Arc, Areg, Arf4, Bdnf, Btg2, Casp3, Egr2, Foxg1, Ifrd1, Jun, Klf4, Nefl, Nr4a3, Nr4a2, Rgs2, Sgk1, Plk2, C9orf72, Rap2a, Ndel1, Inpp5f, Mir132, Mir212, Alkal2
GO:0061629	RNA polymerase II-specific DNA-binding transcription fact...	MF	284	13	2.4907e-08	Egr2, Fos, Nr4a1, Ifrd1, Jun, Jund, Klf4, Cited2, Nr4a3, Nr4a2, Pcna, Tob2, Arid5a
GO:0000977	RNA polymerase II transcription regulatory region sequenc...	MF	1295	27	2.73396e-08	Atf3, Egr1, Egr2, Egr3, Egr4, Fos, Fosb, Fosl2, Nr4a1, Ier2, Jun, Junb, Jund, Klf4, Smad7, Maff, Nfil3, Nr4a3, Nr4a2, Per1, Tsc22d1, Yap1, Zfp869, Zfp957, Kdm6b, Npas4, Ciart
GO:0040011	locomotion	BP	1848	33	2.7816e-08	Adamts1, Arc, Arf4, Bdnf, Egr1, Egr2, Egr3, Foxg1, Nr4a1, Ier2, Ccn1, Jun, Klf4, Krt16, Cited2, Nefl, Nr4a3, Nr4a2, Ptgs2, Ptp4a1, Dusp1, Scg2, Plk2, Zfand5, Spry2, Fbxw7, Pvr, Rap2a, Ndel1, Inpp5f, Ghsr, Trib1, Irs2
GO:0051240	positive regulation of multicellular organismal process	BP	1955	34	3.14747e-08	Adamts1, Bdnf, Btg1, Egr1, Egr2, Egr3, Fos, Gpr3, Foxg1, Ccn1, Jun, Jund, Klf4, Smad7, Cited2, Nefl, Nr4a3, Ptgs2, Rgs2, Rgs4, Rheb, Sgk1, Plk2, Yap1, Gadd45g, Tob2, Nop53, Ndel1, Lrrtm2, Ghsr, Trib1, Arid5a, Kdm6b, Alkal2
GO:0007519	skeletal muscle tissue development	BP	193	11	3.30787e-08	Atf3, Btg2, Egr1, Egr2, Emd, Fos, Nr4a1, Maff, Cited2, Homer1, Sap30
GO:0019901	protein kinase binding	MF	745	20	3.72938e-08	Bcl2l11, Ccnk, Cdkn1a, Cdkn1b, Sik1, Ppp1r15a, Nr4a3, Pcna, Dusp1, Rheb, Sgk1, Spry2, Pard6a, Dusp6, Errfi1, Trib1, Dusp5, Dusp4, Irs2, Alkal2
GO:0007611	learning or memory	BP	295	13	3.89128e-08	Arc, Arf4, Bdnf, Btg2, Casp3, Egr1, Jun, Ptgs2, Sgk1, Plk2, Nptx2, Ghsr, Npas4
GO:0051402	neuron apoptotic process	BP	296	13	4.04849e-08	Bdnf, Bcl2l11, Btg2, Casp3, Egr1, Jun, Mt1, Nefl, Nr4a3, Nr4a2, Fbxw7, Pmaip1, Tnfrsf23
GO:0071901	negative regulation of protein serine/threonine kinase ac...	BP	116	9	4.29906e-08	Casp3, Cdkn1a, Cdkn1b, Dusp1, Rgs2, Spry2, Dusp6, Dusp5, Dusp4
GO:1902531	regulation of intracellular signal transduction	BP	1607	30	4.97074e-08	Atf3, Bcl2l11, Gpr3, Ccn1, Jun, Klf4, Gadd45b, Per1, Ptgs2, Dusp1, Rgs2, Rheb, Tpt1, Gadd45g, Spry2, Fbxw7, Pmaip1, Arpp19, Dusp6, Nop53, Spaar, C9orf72, Errfi1, Rap2a, Tnfrsf23, Inpp5f, Trib1, Dusp5, Dusp4, Alkal2
GO:0000165	MAPK cascade	BP	763	20	5.49895e-08	Atf3, Ccn1, Jun, Klf4, Gadd45b, Per1, Dusp1, Rgs2, Scg2, Gadd45g, Spry2, Fbxw7, Dusp6, Errfi1, Rap2a, Tnfrsf23, Trib1, Dusp5, Dusp4, Alkal2
GO:0060538	skeletal muscle organ development	BP	203	11	5.54918e-08	Atf3, Btg2, Egr1, Egr2, Emd, Fos, Nr4a1, Maff, Cited2, Homer1, Sap30
GO:0000122	negative regulation of transcription by RNA polymerase II	BP	921	22	5.84179e-08	Atf3, Btg2, Plk3, Egr1, Foxg1, Jun, Klf4, Smad7, Cited2, Sik1, Ppp1r15a, Nfil3, Nr4a3, Nr4a2, Pcna, Per1, Sap30, Nop53, Mlip, Dnajb1, Arid5a, Irf2bp2
GO:0043549	regulation of kinase activity	BP	766	20	5.86e-08	Areg, Casp3, Cdkn1a, Cdkn1b, Egr1, Ccn1, Gadd45b, Dusp1, Ranbp2, Rgs2, Gadd45g, Spry2, Fbxw7, Midn, Dusp6, Errfi1, Trib1, Dusp5, Dusp4, Irs2
GO:0140297	DNA-binding transcription factor binding	MF	364	14	6.27087e-08	Egr2, Fos, Nr4a1, Ifrd1, Jun, Jund, Klf4, Cited2, Sik1, Nr4a3, Nr4a2, Pcna, Tob2, Arid5a
GO:0008285	negative regulation of cell population proliferation	BP	695	19	6.28507e-08	Bdnf, Btg1, Btg2, Casp3, Cdkn1a, Cdkn1b, Emd, Fth1, Jun, Klf4, Smad7, Cited2, Ptgs2, Dusp1, Spry2, Tinf2, Tob2, Pmaip1, Trib1
GO:0023014	signal transduction by protein phosphorylation	BP	773	20	6.78903e-08	Atf3, Ccn1, Jun, Klf4, Gadd45b, Per1, Dusp1, Rgs2, Scg2, Gadd45g, Spry2, Fbxw7, Dusp6, Errfi1, Rap2a, Tnfrsf23, Trib1, Dusp5, Dusp4, Alkal2
GO:0043408	regulation of MAPK cascade	BP	713	19	9.34553e-08	Atf3, Ccn1, Jun, Klf4, Gadd45b, Per1, Dusp1, Rgs2, Gadd45g, Spry2, Fbxw7, Dusp6, Errfi1, Rap2a, Tnfrsf23, Trib1, Dusp5, Dusp4, Alkal2
GO:0048514	blood vessel morphogenesis	BP	644	18	1.02538e-07	Adamts1, Btg1, Egr3, Nr4a1, Ccn1, Jun, Junb, Klf4, Smad7, Cited2, Ptgs2, Scg2, Plk2, Yap1, Spry2, Fbxw7, Tiparp, Ghsr
GO:0071495	cellular response to endogenous stimulus	BP	1208	25	1.08425e-07	Bdnf, Casp3, Egr1, Egr3, Fos, Nr4a1, Ccn1, Jun, Smad7, Cited2, Nr4a3, Nr4a2, Per1, Rgs4, Sgk1, Yap1, Spry2, Rasl11b, Spaar, Ndel1, Eprs, Ghsr, Arid5a, Npas4, Irs2
GO:0043523	regulation of neuron apoptotic process	BP	268	12	1.10673e-07	Bdnf, Bcl2l11, Btg2, Casp3, Egr1, Jun, Mt1, Nefl, Nr4a3, Nr4a2, Fbxw7, Pmaip1
GO:0043409	negative regulation of MAPK cascade	BP	172	10	1.17324e-07	Atf3, Klf4, Per1, Dusp1, Rgs2, Spry2, Dusp6, Errfi1, Dusp5, Dusp4
GO:0050890	cognition	BP	332	13	1.53132e-07	Arc, Arf4, Bdnf, Btg2, Casp3, Egr1, Jun, Ptgs2, Sgk1, Plk2, Nptx2, Ghsr, Npas4
GO:0035295	tube development	BP	1148	24	1.65892e-07	Adamts1, Areg, Bdnf, Bcl2l11, Btg1, Egr3, Nr4a1, Ccn1, Jun, Junb, Klf4, Smad7, Cited2, Nr4a3, Ptgs2, Scg2, Plk2, Yap1, Spry2, Fbxw7, Errfi1, Tiparp, Ghsr, Kif18a
GO:0001568	blood vessel development	BP	741	19	1.69033e-07	Adamts1, Btg1, Egr1, Egr3, Nr4a1, Ccn1, Jun, Junb, Klf4, Smad7, Cited2, Ptgs2, Scg2, Plk2, Yap1, Spry2, Fbxw7, Tiparp, Ghsr
GO:0048666	neuron development	BP	1254	25	2.18693e-07	Adamts1, Arc, Areg, Arf4, Bdnf, Btg2, Casp3, Egr2, Foxg1, Ifrd1, Jun, Klf4, Nefl, Nr4a3, Nr4a2, Rgs2, Sgk1, Plk2, C9orf72, Rap2a, Ndel1, Inpp5f, Mir132, Mir212, Alkal2
GO:0009725	response to hormone	BP	678	18	2.1876e-07	Areg, Bdnf, Egr1, Egr2, Nr4a1, Cited2, Nr4a3, Nr4a2, Per1, Sgk1, Yap1, Ndel1, Eprs, Ghsr, Arid5a, Npas4, Vgf, Irs2
GO:0048638	regulation of developmental growth	BP	404	14	2.23864e-07	Bdnf, Bcl2l11, Cdkn1a, Cdkn1b, Ifrd1, Smad7, Cited2, Rgs2, Rgs4, Yap1, Dusp6, Spaar, Ndel1, Ghsr
GO:0007167	enzyme linked receptor protein signaling pathway	BP	917	21	2.39178e-07	Areg, Arf4, Bdnf, Casp3, Egr1, Fos, Ccn1, Jun, Smad7, Cited2, Nr4a3, Zfand5, Spry2, Fbxw7, Rasl11b, Errfi1, Ndel1, Tiparp, Ghsr, Csrnp1, Irs2
GO:0033002	muscle cell proliferation	BP	235	11	2.43558e-07	Adamts1, Cdkn1a, Cdkn1b, Egr1, Jun, Klf4, Cited2, Nr4a3, Ptgs2, Yap1, Trib1
GO:0051247	positive regulation of protein metabolic process	BP	1642	29	2.72913e-07	Areg, Bdnf, Bcl2l11, Casp3, Ccnk, Cdkn1a, Cdkn1b, Plk3, Egr1, Ccn1, Jun, Klf4, Smad7, Ppp1r15a, Gadd45b, Ptgs2, Plk2, Gadd45g, Spry2, Fbxw7, Rassf1, Pmaip1, Nop53, Rap2a, Tnfrsf23, Tiparp, Trib1, Arid5a, Alkal2
GO:0048646	anatomical structure formation involved in morphogenesis	BP	1183	24	2.85679e-07	Adamts1, Bcl2l11, Btg1, Egr2, Egr3, Nr4a1, Ccn1, Jun, Junb, Klf4, Cited2, Nr4a3, Pcdh8, Ptgs2, Dusp1, Scg2, Plk2, Spry2, Fbxw7, Aldh1a3, Ghsr, Kdm6b, Dusp5, Dusp4
GO:0010035	response to inorganic substance	BP	479	15	2.98961e-07	Casp3, Cdkn1b, Fos, Fosb, Nr4a1, Jun, Junb, Jund, Mt1, Nefl, Nr4a3, Nr4a2, Homer1, Kdm6b, Mir132
GO:0070997	neuron death	BP	414	14	3.00607e-07	Bdnf, Bcl2l11, Btg2, Casp3, Egr1, Fos, Jun, Mt1, Nefl, Nr4a3, Nr4a2, Fbxw7, Pmaip1, Tnfrsf23
GO:0035239	tube morphogenesis	BP	930	21	3.01047e-07	Adamts1, Areg, Bcl2l11, Btg1, Egr3, Nr4a1, Ccn1, Jun, Junb, Klf4, Smad7, Cited2, Nr4a3, Ptgs2, Scg2, Plk2, Yap1, Spry2, Fbxw7, Tiparp, Ghsr
GO:0048870	cell motility	BP	1655	29	3.21135e-07	Adamts1, Arc, Arf4, Egr1, Egr3, Foxg1, Nr4a1, Ier2, Ccn1, Jun, Klf4, Krt16, Cited2, Nr4a3, Nr4a2, Ptgs2, Ptp4a1, Dusp1, Scg2, Plk2, Zfand5, Spry2, Fbxw7, Pvr, Rap2a, Ndel1, Inpp5f, Trib1, Irs2
GO:0051674	localization of cell	BP	1655	29	3.21135e-07	Adamts1, Arc, Arf4, Egr1, Egr3, Foxg1, Nr4a1, Ier2, Ccn1, Jun, Klf4, Krt16, Cited2, Nr4a3, Nr4a2, Ptgs2, Ptp4a1, Dusp1, Scg2, Plk2, Zfand5, Spry2, Fbxw7, Pvr, Rap2a, Ndel1, Inpp5f, Trib1, Irs2
GO:0043618	regulation of transcription from RNA polymerase II promot...	BP	46	6	3.69538e-07	Atf3, Egr1, Jun, Cited2, Ppp1r15a, Dnajb1
GO:0060284	regulation of cell development	BP	1114	23	3.81111e-07	Adamts1, Arc, Bdnf, Egr2, Foxg1, Ifrd1, Klf4, Smad7, Nefl, Rgs2, Rgs4, Rheb, Sgk1, Plk2, Yap1, Fbxw7, Rap2a, Ndel1, Inpp5f, Trib1, Mir132, Mir212, Alkal2
GO:0008330	protein tyrosine/threonine phosphatase activity	MF	11	4	4.32528e-07	Dusp1, Dusp6, Dusp5, Dusp4
GO:0000981	DNA-binding transcription factor activity, RNA polymerase...	MF	1212	24	4.40915e-07	Atf3, Egr1, Egr2, Egr3, Egr4, Fos, Fosb, Fosl2, Nr4a1, Ier2, Jun, Junb, Jund, Klf4, Smad7, Maff, Nfil3, Nr4a3, Nr4a2, Tsc22d1, Zfp869, Zfp957, Csrnp1, Npas4
GO:0016477	cell migration	BP	1494	27	4.74302e-07	Adamts1, Arc, Arf4, Egr1, Egr3, Foxg1, Nr4a1, Ccn1, Jun, Klf4, Krt16, Cited2, Nr4a3, Nr4a2, Ptgs2, Ptp4a1, Dusp1, Scg2, Plk2, Zfand5, Spry2, Fbxw7, Pvr, Rap2a, Ndel1, Trib1, Irs2
GO:0070373	negative regulation of ERK1 and ERK2 cascade	BP	78	7	5.24633e-07	Atf3, Klf4, Dusp1, Spry2, Dusp6, Errfi1, Dusp4
GO:0048468	cell development	BP	2418	36	5.38929e-07	Adamts1, Arc, Areg, Arf4, Bdnf, Btg2, Casp3, Egr2, Fosl2, Foxg1, Ifrd1, Jun, Jund, Klf4, Smad7, Cited2, Nefl, Nr4a3, Nr4a2, Rgs2, Rgs4, Rheb, Sgk1, Plk2, Yap1, Homer1, Fbxw7, C9orf72, Rap2a, Ndel1, Inpp5f, Trib1, Frmd6, Mir132, Mir212, Alkal2
GO:0003700	DNA-binding transcription factor activity	MF	1318	25	5.4836e-07	Atf3, Egr1, Egr2, Egr3, Egr4, Fos, Fosb, Fosl2, Foxg1, Nr4a1, Ier2, Jun, Junb, Jund, Klf4, Smad7, Maff, Nfil3, Nr4a3, Nr4a2, Tsc22d1, Zfp869, Zfp957, Csrnp1, Npas4
GO:0032879	regulation of localization	BP	2863	40	5.73891e-07	Adamts1, Arc, Cdkn1b, Plk3, Egr1, Emd, Ccn1, Jun, Kcnj2, Klf4, Krt16, Mest, Cited2, Sik1, Nr4a3, Per1, Ptgs2, Ptp4a1, Dusp1, Rgs2, Rgs4, Sgk1, Slc16a1, Plk2, Spry2, Homer1, Fbxw7, Grasp, Pard6a, Pmaip1, Midn, Rap2a, Ndel1, Inpp5f, Lrrtm2, Eprs, Ghsr, Trib1, Kcnf1, Irs2
GO:1901214	regulation of neuron death	BP	375	13	6.10332e-07	Bdnf, Bcl2l11, Btg2, Casp3, Egr1, Fos, Jun, Mt1, Nefl, Nr4a3, Nr4a2, Fbxw7, Pmaip1
GO:0017017	MAP kinase tyrosine/serine/threonine phosphatase activity	MF	12	4	6.45687e-07	Dusp1, Dusp6, Dusp5, Dusp4
GO:0043620	regulation of DNA-templated transcription in response to ...	BP	51	6	6.92708e-07	Atf3, Egr1, Jun, Cited2, Ppp1r15a, Dnajb1
GO:0048660	regulation of smooth muscle cell proliferation	BP	165	9	8.72673e-07	Adamts1, Cdkn1a, Cdkn1b, Egr1, Jun, Klf4, Nr4a3, Ptgs2, Trib1
GO:0071376	cellular response to corticotropin-releasing hormone stim...	BP	4	3	8.96573e-07	Nr4a1, Nr4a3, Nr4a2
GO:0043435	response to corticotropin-releasing hormone	BP	4	3	8.96573e-07	Nr4a1, Nr4a3, Nr4a2
GO:0045859	regulation of protein kinase activity	BP	670	17	8.98246e-07	Areg, Casp3, Cdkn1a, Cdkn1b, Egr1, Ccn1, Gadd45b, Dusp1, Rgs2, Gadd45g, Spry2, Fbxw7, Dusp6, Errfi1, Trib1, Dusp5, Dusp4
GO:0005667	transcription regulator complex	CC	455	14	9.25477e-07	Fos, Nr4a1, Jun, Junb, Jund, Klf4, Smad7, Nr4a3, Nr4a2, Sap18, Yap1, Taf13, Arid5a, Npas4
GO:0033549	MAP kinase phosphatase activity	MF	13	4	9.28197e-07	Dusp1, Dusp6, Dusp5, Dusp4
GO:0097201	negative regulation of transcription from RNA polymerase ...	BP	13	4	9.28197e-07	Jun, Cited2, Ppp1r15a, Dnajb1
GO:0000278	mitotic cell cycle	BP	831	19	9.49477e-07	Adamts1, Btg1, Btg2, Cdk11b, Cdkn1a, Cdkn1b, Cenpa, Plk3, Foxg1, Klf4, Sik1, Pcna, Plk2, Spry2, Arpp19, Chmp1b, Nop53, Ndel1, Kif18a
GO:0043085	positive regulation of catalytic activity	BP	1092	22	1.04338e-06	Areg, Arf4, Bcl2l11, Btg1, Cdkn1a, Cdkn1b, Egr1, Ccn1, Klf4, Ppp1r15a, Gadd45b, Nr4a2, Pcna, Ranbp2, Rgs4, Gadd45g, Fbxw7, Pmaip1, Tnfrsf23, Dnajb1, Ndel1, Trib1
GO:0043232	intracellular non-membrane-bounded organelle	CC	4482	53	1.06218e-06	Arc, Atf3, Bcl2l11, Cdkn1a, Cenpa, Plk3, Egr1, Egr2, Egr3, Egr4, Emd, Fbl, Jun, Junb, Jund, Klf4, Krt16, Smad7, Cited2, Nefl, Pcna, Ptp4a1, Rpl21, Rpl9, Slc16a1, Plk2, Snu13, Tpt1, Spry2, Homer1, Ddx3y, Tinf2, Hspa14, Fbxw7, Rassf1, Pard6a, Midn, Sap30, Rpl22l1, Nop53, Rasl11a, C9orf72, Ndel1, Taf13, Spty2d1, Arid5a, Kdm6b, Npas4, Ina, Kif18a, H3c7, H3c6, Frmd6
GO:0002042	cell migration involved in sprouting angiogenesis	BP	55	6	1.09265e-06	Egr3, Nr4a1, Klf4, Ptgs2, Plk2, Fbxw7
GO:0048659	smooth muscle cell proliferation	BP	170	9	1.11957e-06	Adamts1, Cdkn1a, Cdkn1b, Egr1, Jun, Klf4, Nr4a3, Ptgs2, Trib1
GO:0032270	positive regulation of cellular protein metabolic process	BP	1565	27	1.15661e-06	Areg, Bdnf, Bcl2l11, Ccnk, Cdkn1a, Cdkn1b, Plk3, Egr1, Ccn1, Jun, Klf4, Smad7, Ppp1r15a, Gadd45b, Ptgs2, Plk2, Gadd45g, Spry2, Fbxw7, Rassf1, Pmaip1, Nop53, Rap2a, Tnfrsf23, Trib1, Arid5a, Alkal2
GO:0043228	non-membrane-bounded organelle	CC	4500	53	1.20223e-06	Arc, Atf3, Bcl2l11, Cdkn1a, Cenpa, Plk3, Egr1, Egr2, Egr3, Egr4, Emd, Fbl, Jun, Junb, Jund, Klf4, Krt16, Smad7, Cited2, Nefl, Pcna, Ptp4a1, Rpl21, Rpl9, Slc16a1, Plk2, Snu13, Tpt1, Spry2, Homer1, Ddx3y, Tinf2, Hspa14, Fbxw7, Rassf1, Pard6a, Midn, Sap30, Rpl22l1, Nop53, Rasl11a, C9orf72, Ndel1, Taf13, Spty2d1, Arid5a, Kdm6b, Npas4, Ina, Kif18a, H3c7, H3c6, Frmd6
GO:0051094	positive regulation of developmental process	BP	1574	27	1.28957e-06	Adamts1, Bdnf, Btg1, Egr1, Egr2, Egr3, Fos, Foxg1, Ccn1, Jun, Junb, Jund, Klf4, Smad7, Cited2, Nefl, Ptgs2, Rgs2, Rheb, Sgk1, Plk2, Yap1, Ndel1, Lrrtm2, Ghsr, Trib1, Alkal2
GO:0097190	apoptotic signaling pathway	BP	614	16	1.35135e-06	Atf3, Bdnf, Bcl2l11, Casp3, Cdk11b, Cdkn1a, Jun, Nr4a2, Ptgs2, Scg2, Siah2, Tpt1, Yap1, Fbxw7, Pmaip1, Tnfrsf23
GO:0044093	positive regulation of molecular function	BP	1481	26	1.35461e-06	Arc, Areg, Arf4, Bdnf, Bcl2l11, Btg1, Cdkn1a, Cdkn1b, Egr1, Ifrd1, Ccn1, Klf4, Ppp1r15a, Gadd45b, Nr4a2, Pcna, Ranbp2, Rgs4, Plk2, Gadd45g, Fbxw7, Pmaip1, Tnfrsf23, Dnajb1, Ndel1, Trib1
GO:0003714	transcription corepressor activity	MF	175	9	1.42463e-06	Btg2, Cited2, Yap1, Tob2, Sap30, Mlip, Dnajb1, Arid5a, Irf2bp2
GO:0080135	regulation of cellular response to stress	BP	698	17	1.56544e-06	Klf4, Ppp1r15a, Gadd45b, Nr4a3, Pcna, Per1, Ptgs2, Dusp1, Plk2, Tpt1, Gadd45g, Fbxw7, Pmaip1, Rap2a, Tnfrsf23, Ndel1, Inpp5f
GO:2001233	regulation of apoptotic signaling pathway	BP	413	13	1.78423e-06	Atf3, Bdnf, Bcl2l11, Cdk11b, Nr4a2, Ptgs2, Scg2, Siah2, Tpt1, Yap1, Fbxw7, Pmaip1, Tnfrsf23
GO:0048699	generation of neurons	BP	1701	28	1.78907e-06	Adamts1, Arc, Areg, Arf4, Bdnf, Btg2, Casp3, Egr2, Foxg1, Ier2, Ifrd1, Jun, Klf4, Nefl, Nr4a3, Nr4a2, Rgs2, Rheb, Sgk1, Plk2, Yap1, C9orf72, Rap2a, Ndel1, Inpp5f, Mir132, Mir212, Alkal2
GO:0030030	cell projection organization	BP	1616	27	2.11762e-06	Adamts1, Arc, Areg, Arf4, Bdnf, Btg2, Casp3, Egr2, Foxg1, Ifrd1, Jun, Klf4, Nefl, Nr4a3, Nr4a2, Rgs2, Sgk1, Plk2, Spry2, Homer1, C9orf72, Rap2a, Ndel1, Inpp5f, Mir132, Mir212, Alkal2
GO:0030182	neuron differentiation	BP	1518	26	2.1289e-06	Adamts1, Arc, Areg, Arf4, Bdnf, Btg2, Casp3, Egr2, Foxg1, Ier2, Ifrd1, Jun, Klf4, Nefl, Nr4a3, Nr4a2, Rgs2, Sgk1, Plk2, C9orf72, Rap2a, Ndel1, Inpp5f, Mir132, Mir212, Alkal2
GO:0061026	cardiac muscle tissue regeneration	BP	5	3	2.23132e-06	Cdkn1a, Cdkn1b, Yap1
GO:0008104	protein localization	BP	2586	36	2.58066e-06	Arc, Arf4, Cdkn1a, Cenpa, Plk3, Egr2, Emd, Smad7, Ppp1r15a, Ptgs2, Ranbp2, Sgk1, Slc16a1, Srp14, Homer1, Tinf2, Fbxw7, Nptx2, Grasp, Pard6a, Tulp2, Pmaip1, Midn, Wdr45b, Chmp1b, Nop53, Arl5b, Rap2a, Arl4d, Ndel1, Ghsr, Kif18a, Ythdc1, Frmd6, Vgf, Irs2
GO:0048511	rhythmic process	BP	299	11	2.58675e-06	Adamts1, Bdnf, Egr1, Egr2, Sik1, Nfil3, Per1, Siah2, Impdh2, Fbxw7, Ciart
GO:0007166	cell surface receptor signaling pathway	BP	2593	36	2.74489e-06	Arc, Areg, Arf4, Atf3, Bdnf, Bcl2l11, Casp3, Cdkn1b, Egr1, Emd, Fos, Ccn1, Jun, Klf4, Smad7, Cited2, Nr4a3, Rgs4, Scg2, Siah2, Yap1, Zfand5, Spry2, Homer1, Fbxw7, Rasl11b, Errfi1, Tnfrsf23, Ndel1, Tiparp, Inpp5f, Ghsr, Trib1, Csrnp1, Npas4, Irs2
GO:0060429	epithelium development	BP	1162	22	2.86221e-06	Areg, Bdnf, Btg1, Casp3, Cdkn1b, Fosl2, Ccn1, Jun, Klf4, Krt16, Smad7, Maff, Cited2, Pcdh8, Ptgs2, Rheb, Yap1, Spry2, Aldh1a3, Errfi1, Kdm6b, Frmd6
GO:0090257	regulation of muscle system process	BP	244	10	2.87083e-06	Kcnj2, Klf4, Smad7, Nr4a3, Ptgs2, Rgs2, Rgs4, Mlip, Errfi1, Ghsr
GO:0008138	protein tyrosine/serine/threonine phosphatase activity	MF	37	5	3.01817e-06	Ptp4a1, Dusp1, Dusp6, Dusp5, Dusp4
GO:0070372	regulation of ERK1 and ERK2 cascade	BP	306	11	3.22944e-06	Atf3, Ccn1, Jun, Klf4, Dusp1, Spry2, Fbxw7, Dusp6, Errfi1, Dusp4, Alkal2
GO:0033036	macromolecule localization	BP	2954	39	3.28327e-06	Arc, Arf4, Cdkn1a, Cenpa, Plk3, Egr2, Emd, Fbl, Smad7, Mest, Ppp1r15a, Ptgs2, Ranbp2, Sgk1, Slc16a1, Srp14, Homer1, Tinf2, Fbxw7, Nptx2, Grasp, Pard6a, Tulp2, Pmaip1, Midn, Wdr45b, Chmp1b, Nop53, Arl5b, Rap2a, Arl4d, Ndel1, Eprs, Ghsr, Kif18a, Ythdc1, Frmd6, Vgf, Irs2
GO:0000785	chromatin	CC	905	19	3.29722e-06	Cenpa, Plk3, Egr1, Egr2, Egr3, Egr4, Jun, Junb, Jund, Klf4, Cited2, Pcna, Plk2, Sap30, Nop53, Kdm6b, Npas4, H3c7, H3c6
GO:0051093	negative regulation of developmental process	BP	1082	21	3.33762e-06	Adamts1, Areg, Bdnf, Ccnk, Cdkn1a, Cdkn1b, Foxg1, Ifrd1, Klf4, Smad7, Cited2, Rgs2, Rgs4, Plk2, Tpt1, Yap1, Spry2, Fbxw7, Tob2, Inpp5f, Trib1
GO:0051641	cellular localization	BP	2730	37	3.3976e-06	Arc, Arf4, Cdkn1a, Cenpa, Plk3, Egr2, Emd, Fth1, Kcnj2, Smad7, Ppp1r15a, Nefl, Nr4a3, Ptgs2, Ranbp2, Srp14, Spry2, Tinf2, Fbxw7, Nptx2, Grasp, Pard6a, Tulp2, Pmaip1, Atp5d, Wdr45b, Chmp1b, Nop53, Arl5b, Rap2a, Arl4d, Ndel1, Inpp5f, Ghsr, Kif18a, Ythdc1, Frmd6
GO:0009628	response to abiotic stimulus	BP	995	20	3.44895e-06	Casp3, Cdkn1a, Plk3, Egr1, Fos, Fosl2, Jun, Cited2, Sik1, Nr4a2, Pcna, Per1, Ptgs2, Sgk1, Yap1, Fbxw7, Pmaip1, Nop53, Vgf, Mir132
GO:1902532	negative regulation of intracellular signal transduction	BP	512	14	3.65071e-06	Atf3, Klf4, Per1, Ptgs2, Dusp1, Rgs2, Tpt1, Spry2, Dusp6, Nop53, Spaar, Errfi1, Dusp5, Dusp4
GO:0120036	plasma membrane bounded cell projection organization	BP	1569	26	3.86886e-06	Adamts1, Arc, Areg, Arf4, Bdnf, Btg2, Casp3, Egr2, Foxg1, Ifrd1, Jun, Klf4, Nefl, Nr4a3, Nr4a2, Rgs2, Sgk1, Plk2, Homer1, C9orf72, Rap2a, Ndel1, Inpp5f, Mir132, Mir212, Alkal2
GO:0000188	inactivation of MAPK activity	BP	18	4	3.87836e-06	Dusp1, Dusp6, Dusp5, Dusp4
GO:0051960	regulation of nervous system development	BP	1098	21	4.18503e-06	Adamts1, Arc, Bdnf, Egr2, Foxg1, Ifrd1, Klf4, Nefl, Rgs2, Rheb, Sgk1, Plk2, Yap1, Rap2a, Ndel1, Inpp5f, Lrrtm2, Ghsr, Mir132, Mir212, Alkal2
GO:0034613	cellular protein localization	BP	1781	28	4.29811e-06	Arc, Arf4, Cdkn1a, Cenpa, Plk3, Egr2, Emd, Smad7, Ppp1r15a, Ptgs2, Ranbp2, Srp14, Tinf2, Fbxw7, Nptx2, Grasp, Pard6a, Tulp2, Pmaip1, Wdr45b, Nop53, Arl5b, Rap2a, Arl4d, Ndel1, Ghsr, Ythdc1, Frmd6
GO:0043407	negative regulation of MAP kinase activity	BP	70	6	4.58016e-06	Dusp1, Rgs2, Spry2, Dusp6, Dusp5, Dusp4
GO:0070727	cellular macromolecule localization	BP	1792	28	4.82609e-06	Arc, Arf4, Cdkn1a, Cenpa, Plk3, Egr2, Emd, Smad7, Ppp1r15a, Ptgs2, Ranbp2, Srp14, Tinf2, Fbxw7, Nptx2, Grasp, Pard6a, Tulp2, Pmaip1, Wdr45b, Nop53, Arl5b, Rap2a, Arl4d, Ndel1, Ghsr, Ythdc1, Frmd6
GO:0070371	ERK1 and ERK2 cascade	BP	323	11	5.40318e-06	Atf3, Ccn1, Jun, Klf4, Dusp1, Spry2, Fbxw7, Dusp6, Errfi1, Dusp4, Alkal2
GO:0030855	epithelial cell differentiation	BP	609	15	5.76125e-06	Btg1, Casp3, Cdkn1b, Fosl2, Jun, Klf4, Krt16, Maff, Ptgs2, Rheb, Yap1, Spry2, Errfi1, Kdm6b, Frmd6
GO:0032991	protein-containing complex	CC	5259	57	5.81217e-06	Atf3, Bcl2l11, Casp3, Ccnk, Cdkn1a, Cdkn1b, Cenpa, Fbl, Fos, Nr4a1, Jun, Junb, Jund, Kcnj2, Klf4, Smad7, Cited2, Ppp1r15a, Nr4a3, Nr4a2, Pcna, Piga, Ptgs2, Ranbp2, Rgs4, Rheb, Rpl21, Rpl9, Sap18, Tra2b, Srp14, Snu13, Yap1, Tinf2, Fbxw7, Pard6a, Sap30, Atp5d, Chmp1b, Cwc25, Fbxo33, C9orf72, Tnfrsf23, Ndel1, Taf13, Kti12, Eprs, Arid5a, Kdm6b, Npas4, Kif18a, Kctd12, H3c7, H3c6, Kcnf1, Irs2, Sap18b
GO:0040012	regulation of locomotion	BP	1031	20	5.83879e-06	Adamts1, Egr1, Ccn1, Jun, Klf4, Krt16, Cited2, Nr4a3, Ptgs2, Ptp4a1, Dusp1, Scg2, Plk2, Spry2, Fbxw7, Rap2a, Inpp5f, Ghsr, Trib1, Irs2
GO:0022008	neurogenesis	BP	1811	28	5.88034e-06	Adamts1, Arc, Areg, Arf4, Bdnf, Btg2, Casp3, Egr2, Foxg1, Ier2, Ifrd1, Jun, Klf4, Nefl, Nr4a3, Nr4a2, Rgs2, Rheb, Sgk1, Plk2, Yap1, C9orf72, Rap2a, Ndel1, Inpp5f, Mir132, Mir212, Alkal2
GO:0035970	peptidyl-threonine dephosphorylation	BP	20	4	6.08219e-06	Dusp1, Dusp6, Dusp5, Dusp4
GO:0070848	response to growth factor	BP	613	15	6.22917e-06	Bdnf, Casp3, Egr1, Egr3, Emd, Fos, Nr4a1, Ier2, Ccn1, Jun, Klf4, Smad7, Cited2, Spry2, Rasl11b
GO:0048589	developmental growth	BP	778	17	6.60527e-06	Areg, Bdnf, Bcl2l11, Cdkn1a, Cdkn1b, Ifrd1, Smad7, Cited2, Rgs2, Rgs4, Yap1, Spry2, Dusp6, Spaar, C9orf72, Ndel1, Ghsr
GO:0009314	response to radiation	BP	398	12	6.94747e-06	Casp3, Cdkn1a, Plk3, Egr1, Jun, Sik1, Pcna, Per1, Sgk1, Yap1, Fbxw7, Pmaip1
GO:0010975	regulation of neuron projection development	BP	621	15	7.26789e-06	Adamts1, Arc, Bdnf, Ifrd1, Klf4, Nefl, Rgs2, Sgk1, Plk2, Rap2a, Ndel1, Inpp5f, Mir132, Mir212, Alkal2
GO:0022402	cell cycle process	BP	1139	21	7.32143e-06	Adamts1, Bcl2l11, Cdk11b, Cdkn1a, Cdkn1b, Cenpa, Plk3, Gpr3, Klf4, Pcna, Slc16a1, Plk2, Spry2, Fbxw7, Rassf1, Pard6a, Arpp19, Chmp1b, Nop53, Ndel1, Kif18a
GO:0046697	decidualization	BP	21	4	7.47741e-06	Junb, Cited2, Ptgs2, Ghsr
GO:0043434	response to peptide hormone	BP	335	11	7.62288e-06	Egr1, Egr2, Nr4a1, Nr4a3, Nr4a2, Sgk1, Ndel1, Eprs, Ghsr, Vgf, Irs2
GO:0007623	circadian rhythm	BP	216	9	7.95723e-06	Bdnf, Egr1, Sik1, Nfil3, Per1, Siah2, Impdh2, Fbxw7, Ciart
GO:0003012	muscle system process	BP	408	12	8.91192e-06	Kcnj2, Klf4, Smad7, Nr4a3, Ptgs2, Rgs2, Rgs4, Homer1, Mlip, Errfi1, Inpp5f, Ghsr
GO:0050767	regulation of neurogenesis	BP	972	19	9.09099e-06	Adamts1, Arc, Bdnf, Egr2, Foxg1, Ifrd1, Klf4, Nefl, Rgs2, Rheb, Sgk1, Plk2, Yap1, Rap2a, Ndel1, Inpp5f, Mir132, Mir212, Alkal2
GO:0051241	negative regulation of multicellular organismal process	BP	1350	23	9.45406e-06	Adamts1, Areg, Bdnf, Cdkn1b, Foxg1, Ifrd1, Klf4, Smad7, Cited2, Ptgs2, Rgs2, Rgs4, Rheb, Plk2, Spry2, Fbxw7, Tob2, Mlip, Errfi1, Inpp5f, Ghsr, Trib1, Dusp5
GO:0031344	regulation of cell projection organization	BP	805	17	1.02802e-05	Adamts1, Arc, Bdnf, Ifrd1, Klf4, Nefl, Rgs2, Sgk1, Plk2, Spry2, Homer1, Rap2a, Ndel1, Inpp5f, Mir132, Mir212, Alkal2
GO:1901701	cellular response to oxygen-containing compound	BP	1165	21	1.02876e-05	Egr1, Fos, Nr4a1, Jun, Mt1, Nr4a3, Nr4a2, Rgs4, Sgk1, Tra2b, Yap1, Spaar, Ndel1, Eprs, Ghsr, Trib1, Arid5a, Kdm6b, Npas4, Irs2, Mir132
GO:0043525	positive regulation of neuron apoptotic process	BP	81	6	1.07229e-05	Bcl2l11, Casp3, Egr1, Jun, Fbxw7, Pmaip1
GO:0051270	regulation of cellular component movement	BP	1075	20	1.07434e-05	Adamts1, Cdkn1b, Egr1, Ccn1, Jun, Kcnj2, Klf4, Krt16, Cited2, Nr4a3, Ptgs2, Ptp4a1, Dusp1, Plk2, Spry2, Fbxw7, Rap2a, Inpp5f, Trib1, Irs2
GO:0002040	sprouting angiogenesis	BP	123	7	1.11911e-05	Egr3, Nr4a1, Klf4, Ptgs2, Plk2, Fbxw7, Ghsr
GO:0007612	learning	BP	172	8	1.15744e-05	Arf4, Bdnf, Btg2, Jun, Ptgs2, Sgk1, Nptx2, Npas4
GO:0008284	positive regulation of cell population proliferation	BP	990	19	1.17457e-05	Adamts1, Areg, Atf3, Cdkn1a, Cdkn1b, Egr1, Egr3, Fosl2, Foxg1, Nr4a1, Ccn1, Jun, Nr4a3, Ptgs2, Scg2, Tsc22d1, Yap1, Ghsr, Irs2
GO:0014070	response to organic cyclic compound	BP	729	16	1.17982e-05	Areg, Bdnf, Casp3, Cdkn1b, Egr1, Fosl2, Nr4a3, Per1, Rgs4, Sgk1, Slc16a1, Yap1, Homer1, Tiparp, Npas4, Mir132
GO:0043500	muscle adaptation	BP	124	7	1.17999e-05	Klf4, Nr4a3, Rgs2, Rgs4, Mlip, Errfi1, Inpp5f
GO:0032870	cellular response to hormone stimulus	BP	493	13	1.20346e-05	Bdnf, Nr4a1, Nr4a3, Nr4a2, Per1, Sgk1, Yap1, Ndel1, Eprs, Ghsr, Arid5a, Npas4, Irs2
GO:0071407	cellular response to organic cyclic compound	BP	494	13	1.22945e-05	Bdnf, Casp3, Cdkn1b, Egr1, Nr4a3, Per1, Rgs4, Sgk1, Slc16a1, Yap1, Tiparp, Npas4, Mir132
GO:0023056	positive regulation of signaling	BP	1888	28	1.26874e-05	Arc, Areg, Atf3, Bdnf, Bcl2l11, Gpr3, Ccn1, Jun, Cited2, Gadd45b, Ptgs2, Rgs4, Rheb, Plk2, Yap1, Gadd45g, Spry2, Fbxw7, Aldh1a3, Pmaip1, Arpp19, Tnfrsf23, Inpp5f, Lrrtm2, Ghsr, Irs2, Mir132, Alkal2
GO:1901216	positive regulation of neuron death	BP	126	7	1.31e-05	Bcl2l11, Casp3, Egr1, Fos, Jun, Fbxw7, Pmaip1
GO:2001234	negative regulation of apoptotic signaling pathway	BP	231	9	1.36133e-05	Bdnf, Cdk11b, Nr4a2, Ptgs2, Scg2, Siah2, Tpt1, Yap1, Tnfrsf23
GO:0007346	regulation of mitotic cell cycle	BP	500	13	1.39603e-05	Adamts1, Btg1, Btg2, Cdk11b, Cdkn1a, Cdkn1b, Plk3, Foxg1, Klf4, Sik1, Plk2, Chmp1b, Nop53
GO:0007169	transmembrane receptor protein tyrosine kinase signaling ...	BP	583	14	1.57691e-05	Areg, Arf4, Bdnf, Casp3, Nr4a3, Zfand5, Spry2, Fbxw7, Errfi1, Ndel1, Tiparp, Ghsr, Csrnp1, Irs2
GO:0009790	embryo development	BP	1211	21	1.8299e-05	Bcl2l11, Ccnk, Cdk11b, Foxg1, Ccn1, Junb, Klf4, Maff, Cited2, Nr4a3, Pcdh8, Dusp1, Tra2b, Yap1, Zfand5, Spry2, Aldh1a3, Ndel1, Kdm6b, Dusp5, Dusp4
GO:0031103	axon regeneration	BP	53	5	1.83561e-05	Jun, Klf4, Nefl, Ndel1, Inpp5f
GO:0033365	protein localization to organelle	BP	844	17	1.88219e-05	Arc, Arf4, Cdkn1a, Cenpa, Ppp1r15a, Ptgs2, Ranbp2, Srp14, Tinf2, Fbxw7, Nptx2, Pard6a, Tulp2, Pmaip1, Nop53, Arl5b, Ghsr
GO:0071900	regulation of protein serine/threonine kinase activity	BP	440	12	1.88439e-05	Casp3, Cdkn1a, Cdkn1b, Gadd45b, Dusp1, Rgs2, Gadd45g, Spry2, Dusp6, Trib1, Dusp5, Dusp4
GO:0005694	chromosome	CC	1410	23	1.88517e-05	Cenpa, Plk3, Egr1, Egr2, Egr3, Egr4, Fbl, Jun, Junb, Jund, Klf4, Cited2, Pcna, Plk2, Tinf2, Sap30, Nop53, Ndel1, Kdm6b, Npas4, Kif18a, H3c7, H3c6
GO:0061564	axon development	BP	515	13	1.9022e-05	Bdnf, Casp3, Egr2, Foxg1, Ifrd1, Jun, Klf4, Nefl, Nr4a3, Nr4a2, C9orf72, Ndel1, Inpp5f
GO:0080134	regulation of response to stress	BP	1316	22	2.00147e-05	Klf4, Ppp1r15a, Gadd45b, Nr4a3, Pcna, Per1, Ptgs2, Dusp1, Plk2, Tpt1, Gadd45g, Fbxw7, Pmaip1, Nop53, Mlip, Errfi1, C2cd4b, Rap2a, Tnfrsf23, Ndel1, Inpp5f, Ghsr
GO:1904705	regulation of vascular associated smooth muscle cell prol...	BP	54	5	2.01293e-05	Adamts1, Cdkn1a, Cdkn1b, Jun, Nr4a3
GO:1990874	vascular associated smooth muscle cell proliferation	BP	54	5	2.01293e-05	Adamts1, Cdkn1a, Cdkn1b, Jun, Nr4a3
GO:1903047	mitotic cell cycle process	BP	678	15	2.03334e-05	Adamts1, Cdk11b, Cdkn1a, Cdkn1b, Cenpa, Plk3, Klf4, Pcna, Plk2, Spry2, Arpp19, Chmp1b, Nop53, Ndel1, Kif18a
GO:0045597	positive regulation of cell differentiation	BP	1127	20	2.11366e-05	Adamts1, Bdnf, Btg1, Egr2, Egr3, Fos, Foxg1, Ccn1, Jun, Junb, Jund, Smad7, Nefl, Ptgs2, Rgs2, Rheb, Sgk1, Ndel1, Trib1, Alkal2
GO:0071363	cellular response to growth factor stimulus	BP	600	14	2.16435e-05	Bdnf, Casp3, Egr1, Egr3, Emd, Fos, Nr4a1, Ccn1, Jun, Klf4, Smad7, Cited2, Spry2, Rasl11b
GO:0031401	positive regulation of protein modification process	BP	1226	21	2.19295e-05	Areg, Bdnf, Ccnk, Cdkn1a, Cdkn1b, Egr1, Ccn1, Jun, Smad7, Ppp1r15a, Gadd45b, Ptgs2, Gadd45g, Spry2, Fbxw7, Rassf1, Nop53, Rap2a, Trib1, Arid5a, Alkal2
GO:0045786	negative regulation of cell cycle	BP	447	12	2.19983e-05	Btg1, Btg2, Casp3, Cdkn1a, Cdkn1b, Plk3, Nr4a1, Klf4, Ptgs2, Plk2, Rassf1, Nop53
GO:0009913	epidermal cell differentiation	BP	189	8	2.28678e-05	Casp3, Fosl2, Klf4, Krt16, Maff, Ptgs2, Yap1, Errfi1
GO:0050804	modulation of chemical synaptic transmission	BP	610	14	2.59342e-05	Arc, Bdnf, Egr1, Pcdh8, Ptgs2, Rgs4, Plk2, Homer1, Nptx2, Lrrtm2, Ghsr, Npas4, Vgf, Mir132
GO:0060052	neurofilament cytoskeleton organization	BP	10	3	2.61774e-05	Nefl, Ndel1, Ina
GO:0099177	regulation of trans-synaptic signaling	BP	611	14	2.64019e-05	Arc, Bdnf, Egr1, Pcdh8, Ptgs2, Rgs4, Plk2, Homer1, Nptx2, Lrrtm2, Ghsr, Npas4, Vgf, Mir132
GO:0001525	angiogenesis	BP	534	13	2.76981e-05	Adamts1, Btg1, Egr3, Nr4a1, Ccn1, Jun, Klf4, Ptgs2, Scg2, Plk2, Spry2, Fbxw7, Ghsr
GO:0044057	regulation of system process	BP	617	14	2.9367e-05	Egr2, Kcnj2, Klf4, Smad7, Nr4a3, Ptgs2, Rgs2, Rgs4, Homer1, Nptx2, Mlip, Errfi1, Ghsr, Dusp5
GO:0045664	regulation of neuron differentiation	BP	788	16	3.03248e-05	Adamts1, Arc, Bdnf, Foxg1, Ifrd1, Klf4, Nefl, Rgs2, Sgk1, Plk2, Rap2a, Ndel1, Inpp5f, Mir132, Mir212, Alkal2
GO:0007507	heart development	BP	623	14	3.2621e-05	Adamts1, Casp3, Cdkn1a, Cdkn1b, Ccn1, Jun, Smad7, Cited2, Sik1, Rgs2, Rgs4, Yap1, Dusp6, Kdm6b
GO:0010647	positive regulation of cell communication	BP	1882	27	3.28786e-05	Arc, Areg, Atf3, Bdnf, Bcl2l11, Gpr3, Ccn1, Jun, Cited2, Gadd45b, Ptgs2, Rgs4, Rheb, Plk2, Yap1, Gadd45g, Spry2, Fbxw7, Aldh1a3, Pmaip1, Arpp19, Tnfrsf23, Lrrtm2, Ghsr, Irs2, Mir132, Alkal2
GO:0043502	regulation of muscle adaptation	BP	99	6	3.38021e-05	Klf4, Nr4a3, Rgs2, Rgs4, Mlip, Errfi1
GO:0120035	regulation of plasma membrane bounded cell projection org...	BP	796	16	3.42129e-05	Adamts1, Arc, Bdnf, Ifrd1, Klf4, Nefl, Rgs2, Sgk1, Plk2, Homer1, Rap2a, Ndel1, Inpp5f, Mir132, Mir212, Alkal2
GO:0040008	regulation of growth	BP	712	15	3.56264e-05	Bdnf, Bcl2l11, Cdkn1a, Cdkn1b, Ifrd1, Smad7, Cited2, Rgs2, Rgs4, Sgk1, Yap1, Dusp6, Spaar, Ndel1, Ghsr
GO:0019207	kinase regulator activity	MF	202	8	3.67568e-05	Casp3, Ccnk, Cdkn1a, Cdkn1b, Klf4, Spry2, Trib1, Alkal2
GO:1905179	negative regulation of cardiac muscle tissue regeneration	BP	2	2	3.7205e-05	Cdkn1a, Cdkn1b
GO:1900924	negative regulation of glycine import across plasma membr...	BP	2	2	3.7205e-05	Rgs2, Rgs4
GO:0070557	PCNA-p21 complex	CC	2	2	3.7205e-05	Cdkn1a, Pcna
GO:1905178	regulation of cardiac muscle tissue regeneration	BP	2	2	3.7205e-05	Cdkn1a, Cdkn1b
GO:2000145	regulation of cell motility	BP	984	18	3.7706e-05	Adamts1, Egr1, Ccn1, Jun, Klf4, Krt16, Cited2, Nr4a3, Ptgs2, Ptp4a1, Dusp1, Plk2, Spry2, Fbxw7, Rap2a, Inpp5f, Trib1, Irs2
GO:2000060	positive regulation of ubiquitin-dependent protein catabo...	BP	101	6	3.78465e-05	Plk3, Smad7, Plk2, Fbxw7, Nop53, Trib1
GO:1901652	response to peptide	BP	399	11	3.82317e-05	Egr1, Egr2, Nr4a1, Nr4a3, Nr4a2, Sgk1, Ndel1, Eprs, Ghsr, Vgf, Irs2
GO:0007613	memory	BP	149	7	3.86621e-05	Arc, Bdnf, Egr1, Ptgs2, Sgk1, Plk2, Npas4
GO:0071241	cellular response to inorganic substance	BP	204	8	3.94162e-05	Cdkn1b, Fos, Fosb, Jun, Junb, Jund, Mt1, Mir132
GO:0031102	neuron projection regeneration	BP	62	5	3.95902e-05	Jun, Klf4, Nefl, Ndel1, Inpp5f
GO:0009605	response to external stimulus	BP	2695	34	4.00272e-05	Atf3, Bdnf, Cdkn1a, Egr2, Egr3, Fos, Foxg1, Nr4a1, Ccn1, Jun, Klf4, Krt16, Sik1, Nr4a3, Nr4a2, Per1, Ptgs2, Dusp1, Scg2, Slc16a1, Aldh1a3, Wdr45b, Nop53, Spaar, C2cd4b, Ndel1, Snhg1, Inpp5f, Eprs, Ghsr, Trib1, Tent5a, Arid5a, Vgf
GO:0048584	positive regulation of response to stimulus	BP	2238	30	4.07749e-05	Arc, Areg, Atf3, Bdnf, Bcl2l11, Gpr3, Ccn1, Jun, Cited2, Ppp1r15a, Gadd45b, Nr4a3, Pcna, Ptgs2, Rgs4, Rheb, Scg2, Yap1, Gadd45g, Spry2, Fbxw7, Aldh1a3, Pmaip1, Arpp19, C2cd4b, Tnfrsf23, Ndel1, Ghsr, Arid5a, Alkal2
GO:0003300	cardiac muscle hypertrophy	BP	103	6	4.22702e-05	Nr4a3, Rgs2, Rgs4, Mlip, Errfi1, Inpp5f
GO:0035035	histone acetyltransferase binding	MF	32	4	4.26241e-05	Egr1, Cited2, Nr4a3, Pcna
GO:0001893	maternal placenta development	BP	32	4	4.26241e-05	Junb, Cited2, Ptgs2, Ghsr
GO:0010614	negative regulation of cardiac muscle hypertrophy	BP	32	4	4.26241e-05	Rgs2, Rgs4, Mlip, Errfi1
GO:0042246	tissue regeneration	BP	63	5	4.27912e-05	Cdkn1a, Cdkn1b, Ifrd1, Yap1, Spaar
GO:0043281	regulation of cysteine-type endopeptidase activity involv...	BP	207	8	4.37053e-05	Bcl2l11, Nr4a1, Ccn1, Klf4, Ptgs2, Siah2, Pmaip1, Tnfrsf23
GO:0035257	nuclear hormone receptor binding	MF	152	7	4.38989e-05	Nr4a1, Jund, Nr4a3, Nr4a2, Pcna, Tob2, Arid5a
GO:0005829	cytosol	CC	3561	41	4.66434e-05	Arf4, Bcl2l11, Casp3, Cdkn1a, Cdkn1b, Nr4a1, Jun, Smad7, Sik1, Mt1, Per1, Rgs2, Rgs4, Rpl21, Rpl9, Sap18, Sgk1, Siah2, Tpt1, Ubc, Yap1, Impdh2, Spry2, Homer1, Ddx3y, Hspa14, Fbxw7, Tob2, Midn, Wdr45b, Dusp6, Nop53, Errfi1, Rap2a, Dnajb1, Ndel1, Eprs, Plpbp, Blvrb, Irs2, Sap18b
GO:0048598	embryonic morphogenesis	BP	645	14	4.74237e-05	Bcl2l11, Foxg1, Ccn1, Klf4, Cited2, Nr4a3, Pcdh8, Dusp1, Yap1, Spry2, Aldh1a3, Kdm6b, Dusp5, Dusp4
GO:0004861	cyclin-dependent protein serine/threonine kinase inhibito...	MF	12	3	4.75604e-05	Casp3, Cdkn1a, Cdkn1b
GO:0014745	negative regulation of muscle adaptation	BP	12	3	4.75604e-05	Klf4, Mlip, Errfi1
GO:0030856	regulation of epithelial cell differentiation	BP	155	7	4.97038e-05	Btg1, Cdkn1b, Maff, Rheb, Yap1, Spry2, Errfi1
GO:0071248	cellular response to metal ion	BP	156	7	5.17729e-05	Cdkn1b, Fos, Fosb, Jun, Junb, Jund, Mt1
GO:0048145	regulation of fibroblast proliferation	BP	107	6	5.23592e-05	Cdkn1a, Emd, Fosl2, Fth1, Jun, Pmaip1
GO:0014897	striated muscle hypertrophy	BP	107	6	5.23592e-05	Nr4a3, Rgs2, Rgs4, Mlip, Errfi1, Inpp5f
GO:0045862	positive regulation of proteolysis	BP	343	10	5.43053e-05	Bcl2l11, Plk3, Ccn1, Smad7, Plk2, Fbxw7, Pmaip1, Nop53, Tnfrsf23, Trib1
GO:0014741	negative regulation of muscle hypertrophy	BP	34	4	5.44476e-05	Rgs2, Rgs4, Mlip, Errfi1
GO:0051234	establishment of localization	BP	4484	48	5.74592e-05	Arc, Arf4, Bdnf, Bcl2l11, Cdkn1a, Cdkn1b, Cenpa, Plk3, Egr2, Emd, Fth1, Kcnj2, Sik1, Nefl, Nr4a3, Per1, Slc25a3, Ptgs2, Ranbp2, Rgs2, Rgs4, Sgk1, Slc16a1, Srp14, Spry2, Homer1, Hspa14, Fbxw7, Grasp, Pard6a, Pmaip1, Midn, Atp5d, Chmp1b, C9orf72, Arl5b, Rap2a, Arl4d, Ndel1, Inpp5f, Lrrtm2, Eprs, Ghsr, Kif18a, Ythdc1, Vgf, Kcnf1, Irs2
GO:0048144	fibroblast proliferation	BP	109	6	5.80793e-05	Cdkn1a, Emd, Fosl2, Fth1, Jun, Pmaip1
GO:0014896	muscle hypertrophy	BP	109	6	5.80793e-05	Nr4a3, Rgs2, Rgs4, Mlip, Errfi1, Inpp5f
GO:1901800	positive regulation of proteasomal protein catabolic proc...	BP	109	6	5.80793e-05	Plk3, Smad7, Plk2, Fbxw7, Nop53, Trib1
GO:0090575	RNA polymerase II transcription regulator complex	CC	159	7	5.84078e-05	Fos, Jun, Junb, Jund, Smad7, Yap1, Taf13
GO:0022607	cellular component assembly	BP	2646	33	6.62057e-05	Arc, Bdnf, Bcl2l11, Cdkn1b, Cenpa, Kcnj2, Smad7, Nefl, Sgk1, Plk2, Snu13, Yap1, Homer1, Tinf2, Aldh1a3, Nap1l5, Atp5d, Wdr45b, Chmp1b, Nop53, C9orf72, Rap2a, Dnajb1, Ndel1, Spty2d1, Lrrtm2, Ghsr, Npas4, Ythdc1, Kctd12, H3c7, H3c6, Kcnf1
GO:0030334	regulation of cell migration	BP	934	17	6.63271e-05	Adamts1, Egr1, Ccn1, Jun, Klf4, Krt16, Cited2, Nr4a3, Ptgs2, Ptp4a1, Dusp1, Plk2, Spry2, Fbxw7, Rap2a, Trib1, Irs2
GO:0048678	response to axon injury	BP	69	5	6.64213e-05	Jun, Klf4, Nefl, Ndel1, Inpp5f
GO:0044085	cellular component biogenesis	BP	2886	35	6.7574e-05	Arc, Bdnf, Bcl2l11, Cdkn1b, Cenpa, Fbl, Ccn1, Kcnj2, Smad7, Nefl, Sgk1, Plk2, Snu13, Yap1, Homer1, Tinf2, Aldh1a3, Nap1l5, Atp5d, Wdr45b, Chmp1b, Nop53, C9orf72, Rap2a, Dnajb1, Ndel1, Spty2d1, Lrrtm2, Ghsr, Npas4, Ythdc1, Kctd12, H3c7, H3c6, Kcnf1
GO:0030216	keratinocyte differentiation	BP	112	6	6.75853e-05	Casp3, Fosl2, Krt16, Ptgs2, Yap1, Errfi1
GO:0098685	Schaffer collateral - CA1 synapse	CC	113	6	7.10159e-05	Nefl, Pcdh8, Grasp, Lrrtm2, Ghsr, Ina
GO:0016922	nuclear receptor binding	MF	114	6	7.4584e-05	Nr4a1, Jund, Nr4a3, Nr4a2, Pcna, Arid5a
GO:0033993	response to lipid	BP	761	15	7.52451e-05	Areg, Bdnf, Fosl2, Klf4, Mest, Pcna, Per1, Ptgs2, Sgk1, Yap1, Trib1, Arid5a, Npas4, Ovca2, Mir132
GO:0061469	regulation of type B pancreatic cell proliferation	BP	14	3	7.79838e-05	Nr4a1, Nr4a3, Errfi1
GO:0010611	regulation of cardiac muscle hypertrophy	BP	72	5	8.14764e-05	Nr4a3, Rgs2, Rgs4, Mlip, Errfi1
GO:0035335	peptidyl-tyrosine dephosphorylation	BP	38	4	8.50227e-05	Dusp1, Dusp6, Dusp5, Dusp4
GO:0000226	microtubule cytoskeleton organization	BP	597	13	8.58909e-05	Cdkn1b, Cenpa, Plk3, Nefl, Sgk1, Slc16a1, Plk2, Spry2, Rassf1, Pard6a, Chmp1b, Ndel1, Kif18a
GO:0050673	epithelial cell proliferation	BP	437	11	8.61755e-05	Areg, Cdkn1b, Egr3, Nr4a1, Jun, Nr4a3, Scg2, Yap1, Tinf2, Errfi1, Ghsr
GO:0019887	protein kinase regulator activity	MF	170	7	8.89582e-05	Casp3, Ccnk, Cdkn1a, Cdkn1b, Spry2, Trib1, Alkal2
GO:0090049	regulation of cell migration involved in sprouting angiog...	BP	39	4	9.42884e-05	Klf4, Ptgs2, Plk2, Fbxw7
GO:0043534	blood vessel endothelial cell migration	BP	119	6	9.46293e-05	Egr3, Nr4a1, Klf4, Ptgs2, Plk2, Fbxw7
GO:0006996	organelle organization	BP	3679	41	9.68977e-05	Arc, Bcl2l11, Cdk11b, Cdkn1b, Cenpa, Plk3, Fbl, Gpr3, Jun, Krt16, Nefl, Pcna, Per1, Rgs4, Sgk1, Slc16a1, Plk2, Spry2, Tinf2, Fbxw7, Rassf1, Pard6a, Nap1l5, Pmaip1, Atp5d, Wdr45b, Chmp1b, Nop53, C9orf72, Rap2a, Ndel1, Spty2d1, Lrrtm2, Ghsr, Arid5a, Kdm6b, Ina, Kif18a, H3c7, H3c6, Frmd6
GO:2000116	regulation of cysteine-type endopeptidase activity	BP	232	8	9.7044e-05	Bcl2l11, Nr4a1, Ccn1, Klf4, Ptgs2, Siah2, Pmaip1, Tnfrsf23
GO:0007010	cytoskeleton organization	BP	1362	21	9.86311e-05	Arc, Cdkn1b, Cenpa, Plk3, Krt16, Nefl, Rgs4, Sgk1, Slc16a1, Plk2, Spry2, Rassf1, Pard6a, Chmp1b, C9orf72, Rap2a, Ndel1, Ghsr, Ina, Kif18a, Frmd6
GO:0014743	regulation of muscle hypertrophy	BP	75	5	9.90288e-05	Nr4a3, Rgs2, Rgs4, Mlip, Errfi1
GO:1903670	regulation of sprouting angiogenesis	BP	75	5	9.90288e-05	Klf4, Ptgs2, Plk2, Fbxw7, Ghsr
GO:0046620	regulation of organ growth	BP	120	6	9.91089e-05	Bcl2l11, Cited2, Rgs2, Rgs4, Yap1, Dusp6
GO:0043405	regulation of MAP kinase activity	BP	299	9	0.000100955	Gadd45b, Dusp1, Rgs2, Gadd45g, Spry2, Dusp6, Trib1, Dusp5, Dusp4
GO:0032868	response to insulin	BP	234	8	0.000102981	Egr1, Egr2, Sgk1, Ndel1, Eprs, Ghsr, Vgf, Irs2
GO:0050678	regulation of epithelial cell proliferation	BP	371	10	0.000103814	Cdkn1b, Egr3, Nr4a1, Jun, Nr4a3, Scg2, Yap1, Tinf2, Errfi1, Ghsr
GO:0007616	long-term memory	BP	40	4	0.000104266	Arc, Egr1, Sgk1, Npas4
GO:0045930	negative regulation of mitotic cell cycle	BP	235	8	0.000106061	Btg1, Btg2, Cdkn1a, Cdkn1b, Plk3, Klf4, Plk2, Nop53
GO:0048167	regulation of synaptic plasticity	BP	302	9	0.000108865	Arc, Bdnf, Egr1, Ptgs2, Plk2, Lrrtm2, Npas4, Vgf, Mir132
GO:1900923	regulation of glycine import across plasma membrane	BP	3	2	0.000111165	Rgs2, Rgs4
GO:0099184	structural constituent of postsynaptic intermediate filam...	MF	3	2	0.000111165	Nefl, Ina
GO:0010243	response to organonitrogen compound	BP	881	16	0.000112034	Casp3, Egr1, Egr2, Nr4a1, Nr4a3, Nr4a2, Per1, Rgs4, Sgk1, Homer1, Spaar, Ndel1, Eprs, Ghsr, Vgf, Irs2
GO:0071277	cellular response to calcium ion	BP	77	5	0.000112251	Fos, Fosb, Jun, Junb, Jund
GO:0051019	mitogen-activated protein kinase binding	MF	41	4	0.000114988	Dusp1, Dusp6, Dusp5, Dusp4
GO:1900744	regulation of p38MAPK cascade	BP	41	4	0.000114988	Gadd45b, Per1, Dusp1, Gadd45g
GO:0045184	establishment of protein localization	BP	1807	25	0.000117264	Arc, Arf4, Cdkn1a, Plk3, Egr2, Emd, Ptgs2, Ranbp2, Slc16a1, Srp14, Fbxw7, Grasp, Pard6a, Pmaip1, Midn, Chmp1b, Arl5b, Rap2a, Arl4d, Ndel1, Ghsr, Kif18a, Ythdc1, Vgf, Irs2
GO:1903052	positive regulation of proteolysis involved in cellular p...	BP	124	6	0.000118742	Plk3, Smad7, Plk2, Fbxw7, Nop53, Trib1
GO:0009991	response to extracellular stimulus	BP	378	10	0.00012092	Atf3, Cdkn1a, Fos, Jun, Sik1, Nr4a2, Slc16a1, Wdr45b, Ghsr, Vgf
GO:0040007	growth	BP	1080	18	0.000122574	Areg, Bdnf, Bcl2l11, Cdkn1a, Cdkn1b, Ifrd1, Smad7, Cited2, Rgs2, Rgs4, Sgk1, Yap1, Spry2, Dusp6, Spaar, C9orf72, Ndel1, Ghsr
GO:0045596	negative regulation of cell differentiation	BP	796	15	0.000123408	Areg, Bdnf, Ccnk, Foxg1, Ifrd1, Smad7, Rgs2, Rgs4, Plk2, Yap1, Spry2, Fbxw7, Tob2, Inpp5f, Trib1
GO:0015031	protein transport	BP	1704	24	0.000123978	Arc, Arf4, Cdkn1a, Plk3, Egr2, Emd, Ptgs2, Ranbp2, Slc16a1, Srp14, Fbxw7, Grasp, Pard6a, Pmaip1, Midn, Chmp1b, Arl5b, Arl4d, Ndel1, Ghsr, Kif18a, Ythdc1, Vgf, Irs2
GO:0065003	protein-containing complex assembly	BP	1386	21	0.000125619	Arc, Bcl2l11, Cdkn1b, Cenpa, Kcnj2, Nefl, Sgk1, Snu13, Yap1, Homer1, Aldh1a3, Nap1l5, Atp5d, Nop53, Ndel1, Spty2d1, Ythdc1, Kctd12, H3c7, H3c6, Kcnf1
GO:0051427	hormone receptor binding	MF	181	7	0.000131431	Nr4a1, Jund, Nr4a3, Nr4a2, Pcna, Tob2, Arid5a
GO:0043524	negative regulation of neuron apoptotic process	BP	181	7	0.000131431	Bdnf, Btg2, Jun, Mt1, Nefl, Nr4a3, Nr4a2
GO:0098916	anterograde trans-synaptic signaling	BP	804	15	0.000137599	Arc, Bdnf, Egr1, Egr3, Pcdh8, Ptgs2, Rgs4, Plk2, Homer1, Nptx2, Lrrtm2, Ghsr, Npas4, Vgf, Mir132
GO:0007268	chemical synaptic transmission	BP	804	15	0.000137599	Arc, Bdnf, Egr1, Egr3, Pcdh8, Ptgs2, Rgs4, Plk2, Homer1, Nptx2, Lrrtm2, Ghsr, Npas4, Vgf, Mir132
GO:0009896	positive regulation of catabolic process	BP	462	11	0.000140284	Bcl2l11, Btg2, Plk3, Smad7, Plk2, Fbxw7, Nop53, C9orf72, Tiparp, Trib1, Irs2
GO:0051592	response to calcium ion	BP	128	6	0.000141342	Fos, Fosb, Jun, Junb, Jund, Homer1
GO:0051223	regulation of protein transport	BP	628	13	0.000141685	Arc, Plk3, Emd, Ptgs2, Slc16a1, Fbxw7, Grasp, Pard6a, Pmaip1, Midn, Ndel1, Ghsr, Irs2
GO:0030234	enzyme regulator activity	MF	996	17	0.000143539	Casp3, Ccnk, Cdkn1a, Cdkn1b, Jun, Klf4, Ppp1r15a, Pcna, Ranbp2, Rgs2, Rgs4, Spry2, Fbxw7, Arpp19, Dnajb1, Trib1, Alkal2
GO:0000790	nuclear chromatin	CC	717	14	0.000144477	Cenpa, Egr1, Egr2, Egr3, Egr4, Jun, Junb, Jund, Klf4, Cited2, Sap30, Kdm6b, Npas4, H3c6
GO:1902895	positive regulation of pri-miRNA transcription by RNA pol...	BP	44	4	0.00015195	Egr1, Fos, Jun, Klf4
GO:1903672	positive regulation of sprouting angiogenesis	BP	44	4	0.00015195	Klf4, Ptgs2, Plk2, Ghsr
GO:0048640	negative regulation of developmental growth	BP	130	6	0.000153851	Cdkn1a, Cdkn1b, Ifrd1, Cited2, Rgs2, Rgs4
GO:0099537	trans-synaptic signaling	BP	813	15	0.000155243	Arc, Bdnf, Egr1, Egr3, Pcdh8, Ptgs2, Rgs4, Plk2, Homer1, Nptx2, Lrrtm2, Ghsr, Npas4, Vgf, Mir132
GO:0030162	regulation of proteolysis	BP	724	14	0.000159694	Bcl2l11, Plk3, Nr4a1, Ccn1, Klf4, Smad7, Ptgs2, Siah2, Plk2, Fbxw7, Pmaip1, Nop53, Tnfrsf23, Trib1
GO:0045923	positive regulation of fatty acid metabolic process	BP	45	4	0.000165981	Nr4a3, Ptgs2, Ghsr, Irs2
GO:0099175	regulation of postsynapse organization	BP	132	6	0.000167221	Arc, Arf4, Rheb, Homer1, Lrrtm2, Ghsr
GO:0010469	regulation of signaling receptor activity	BP	132	6	0.000167221	Arc, Areg, Homer1, Fbxw7, Nptx2, Errfi1
GO:0048608	reproductive structure development	BP	472	11	0.000168877	Adamts1, Bcl2l11, Cdkn1b, Ccn1, Junb, Cited2, Ptgs2, Tiparp, Ghsr, Kif18a, Vgf
GO:0071375	cellular response to peptide hormone stimulus	BP	252	8	0.000171247	Nr4a1, Nr4a3, Nr4a2, Sgk1, Ndel1, Eprs, Ghsr, Irs2
GO:0031331	positive regulation of cellular catabolic process	BP	395	10	0.000172638	Bcl2l11, Btg2, Plk3, Smad7, Plk2, Fbxw7, Nop53, C9orf72, Trib1, Irs2
GO:0003682	chromatin binding	MF	641	13	0.000173074	Egr1, Egr2, Fos, Fosl2, Jun, Klf4, Cited2, Pcna, Per1, Yap1, Nap1l5, Arid5a, Kdm6b
GO:0098794	postsynapse	CC	730	14	0.000173823	Arc, Arf4, Kcnj2, Nefl, Pcdh8, Rheb, Homer1, Nptx2, Grasp, Dnajb1, Lrrtm2, Ina, Kctd12, Mir132
GO:0043005	neuron projection	CC	1529	22	0.000179422	Arc, Arf4, Bdnf, Plk3, Fos, Kcnj2, Nefl, Ptgs2, Rgs2, Rheb, Sgk1, Siah2, Plk2, Homer1, Pard6a, C9orf72, Dnajb1, Ndel1, Inpp5f, Ghsr, Blvrb, Vgf
GO:0061458	reproductive system development	BP	476	11	0.000181626	Adamts1, Bcl2l11, Cdkn1b, Ccn1, Junb, Cited2, Ptgs2, Tiparp, Ghsr, Kif18a, Vgf
GO:0060420	regulation of heart growth	BP	86	5	0.000189273	Cited2, Rgs2, Rgs4, Yap1, Dusp6
GO:0003008	system process	BP	2921	34	0.000191872	Arc, Arf4, Bdnf, Btg2, Casp3, Cdkn1b, Egr1, Egr2, Jun, Kcnj2, Klf4, Smad7, Nefl, Nr4a3, Ptgs2, Rgs2, Rgs4, Sgk1, Plk2, Yap1, Zfand5, Spry2, Homer1, Nptx2, Aldh1a3, Fam107b, Mlip, Errfi1, C2cd4b, Inpp5f, Ghsr, Npas4, Dusp5, Olfr1385
GO:0016538	cyclin-dependent protein serine/threonine kinase regulato...	MF	47	4	0.000196815	Casp3, Ccnk, Cdkn1a, Cdkn1b
GO:0060135	maternal process involved in female pregnancy	BP	47	4	0.000196815	Junb, Cited2, Ptgs2, Ghsr
GO:0043029	T cell homeostasis	BP	47	4	0.000196815	Bcl2l11, Casp3, Pmaip1, Tnfrsf23
GO:0015833	peptide transport	BP	1759	24	0.000199423	Arc, Arf4, Cdkn1a, Plk3, Egr2, Emd, Ptgs2, Ranbp2, Slc16a1, Srp14, Fbxw7, Grasp, Pard6a, Pmaip1, Midn, Chmp1b, Arl5b, Arl4d, Ndel1, Ghsr, Kif18a, Ythdc1, Vgf, Irs2
GO:0071705	nitrogen compound transport	BP	2099	27	0.000202313	Arc, Arf4, Bdnf, Cdkn1a, Plk3, Egr2, Emd, Ptgs2, Ranbp2, Rgs2, Rgs4, Slc16a1, Srp14, Fbxw7, Grasp, Pard6a, Pmaip1, Midn, Chmp1b, Arl5b, Arl4d, Ndel1, Ghsr, Kif18a, Ythdc1, Vgf, Irs2
GO:1903960	negative regulation of anion transmembrane transport	BP	19	3	0.000202972	Rgs2, Rgs4, Irs2
GO:0032436	positive regulation of proteasomal ubiquitin-dependent pr...	BP	88	5	0.000210824	Plk3, Smad7, Plk2, Nop53, Trib1
GO:0035258	steroid hormone receptor binding	MF	88	5	0.000210824	Nr4a1, Nr4a3, Nr4a2, Pcna, Arid5a
GO:0045202	synapse	CC	1441	21	0.000213512	Arc, Arf4, Bdnf, Kcnj2, Nefl, Pcdh8, Rheb, Rpl9, Slc16a1, Homer1, Nptx2, Grasp, Dnajb1, Ndel1, Lrrtm2, Ghsr, Ina, Blvrb, Kctd12, Vgf, Mir132
GO:0038066	p38MAPK cascade	BP	48	4	0.000213686	Gadd45b, Per1, Dusp1, Gadd45g
GO:0070201	regulation of establishment of protein localization	BP	657	13	0.000219768	Arc, Plk3, Emd, Ptgs2, Slc16a1, Fbxw7, Grasp, Pard6a, Pmaip1, Midn, Ndel1, Ghsr, Irs2
GO:0006974	cellular response to DNA damage stimulus	BP	747	14	0.000219878	Bcl2l11, Btg2, Casp3, Ccnk, Cdkn1a, Plk3, Pcna, Sgk1, Tpt1, Yap1, Fbxw7, Rassf1, Pmaip1, Nop53
GO:0099160	postsynaptic intermediate filament cytoskeleton	CC	4	2	0.000221433	Nefl, Ina
GO:0006810	transport	BP	4344	45	0.000224822	Arc, Arf4, Bdnf, Bcl2l11, Cdkn1a, Cdkn1b, Plk3, Egr2, Emd, Fth1, Kcnj2, Sik1, Nefl, Nr4a3, Per1, Slc25a3, Ptgs2, Ranbp2, Rgs2, Rgs4, Sgk1, Slc16a1, Srp14, Homer1, Hspa14, Fbxw7, Grasp, Pard6a, Pmaip1, Midn, Atp5d, Chmp1b, C9orf72, Arl5b, Arl4d, Ndel1, Inpp5f, Lrrtm2, Eprs, Ghsr, Kif18a, Ythdc1, Vgf, Kcnf1, Irs2
GO:0099536	synaptic signaling	BP	842	15	0.000226163	Arc, Bdnf, Egr1, Egr3, Pcdh8, Ptgs2, Rgs4, Plk2, Homer1, Nptx2, Lrrtm2, Ghsr, Npas4, Vgf, Mir132
GO:0001102	RNA polymerase II activating transcription factor binding	MF	49	4	0.000231575	Egr2, Fos, Jun, Cited2
GO:0071417	cellular response to organonitrogen compound	BP	574	12	0.000233721	Casp3, Egr1, Nr4a1, Nr4a3, Nr4a2, Rgs4, Sgk1, Spaar, Ndel1, Eprs, Ghsr, Irs2
GO:0002521	leukocyte differentiation	BP	574	12	0.000233721	Egr1, Egr3, Fos, Jun, Junb, Smad7, Cited2, Gadd45g, Fbxw7, Tob2, Trib1, Irf2bp2
GO:0035259	glucocorticoid receptor binding	MF	20	3	0.000237717	Nr4a1, Nr4a3, Nr4a2
GO:0099186	structural constituent of postsynapse	MF	20	3	0.000237717	Nefl, Homer1, Ina
GO:0009967	positive regulation of signal transduction	BP	1561	22	0.000239443	Arc, Areg, Atf3, Bdnf, Bcl2l11, Gpr3, Ccn1, Jun, Cited2, Gadd45b, Rgs4, Rheb, Yap1, Gadd45g, Spry2, Fbxw7, Aldh1a3, Pmaip1, Arpp19, Tnfrsf23, Ghsr, Alkal2
GO:0001938	positive regulation of endothelial cell proliferation	BP	91	5	0.000246593	Egr3, Nr4a1, Jun, Scg2, Ghsr
GO:0051049	regulation of transport	BP	1897	25	0.000247064	Arc, Plk3, Emd, Kcnj2, Sik1, Nr4a3, Per1, Ptgs2, Rgs2, Rgs4, Sgk1, Slc16a1, Homer1, Fbxw7, Grasp, Pard6a, Pmaip1, Midn, Ndel1, Inpp5f, Lrrtm2, Eprs, Ghsr, Kcnf1, Irs2
GO:0042886	amide transport	BP	1785	24	0.000247571	Arc, Arf4, Cdkn1a, Plk3, Egr2, Emd, Ptgs2, Ranbp2, Slc16a1, Srp14, Fbxw7, Grasp, Pard6a, Pmaip1, Midn, Chmp1b, Arl5b, Arl4d, Ndel1, Ghsr, Kif18a, Ythdc1, Vgf, Irs2
GO:0043933	protein-containing complex subunit organization	BP	1567	22	0.000252488	Arc, Bcl2l11, Cdkn1b, Cenpa, Kcnj2, Nefl, Sgk1, Snu13, Yap1, Homer1, Aldh1a3, Nap1l5, Atp5d, Nop53, Ndel1, Spty2d1, Kif18a, Ythdc1, Kctd12, H3c7, H3c6, Kcnf1
GO:0000228	nuclear chromosome	CC	950	16	0.000262051	Cenpa, Egr1, Egr2, Egr3, Egr4, Jun, Junb, Jund, Klf4, Cited2, Pcna, Tinf2, Sap30, Kdm6b, Npas4, H3c6
GO:0090087	regulation of peptide transport	BP	671	13	0.000269112	Arc, Plk3, Emd, Ptgs2, Slc16a1, Fbxw7, Grasp, Pard6a, Pmaip1, Midn, Ndel1, Ghsr, Irs2
GO:1903364	positive regulation of cellular protein catabolic process	BP	145	6	0.00027809	Plk3, Smad7, Plk2, Fbxw7, Nop53, Trib1
GO:0031098	stress-activated protein kinase signaling cascade	BP	271	8	0.000279909	Gadd45b, Per1, Dusp1, Gadd45g, Errfi1, Rap2a, Tnfrsf23, Trib1
GO:0035265	organ growth	BP	205	7	0.000281838	Bcl2l11, Cited2, Rgs2, Rgs4, Yap1, Spry2, Dusp6
GO:0045104	intermediate filament cytoskeleton organization	BP	52	4	0.000291698	Krt16, Nefl, Ndel1, Ina
GO:0010038	response to metal ion	BP	273	8	0.000294047	Cdkn1b, Fos, Fosb, Jun, Junb, Jund, Mt1, Homer1
GO:0051347	positive regulation of transferase activity	BP	589	12	0.000295162	Areg, Cdkn1a, Cdkn1b, Egr1, Ccn1, Klf4, Gadd45b, Pcna, Ranbp2, Gadd45g, Fbxw7, Trib1
GO:0050679	positive regulation of epithelial cell proliferation	BP	207	7	0.000298896	Egr3, Nr4a1, Jun, Nr4a3, Scg2, Yap1, Ghsr
GO:0045103	intermediate filament-based process	BP	53	4	0.000314011	Krt16, Nefl, Ndel1, Ina
GO:0048662	negative regulation of smooth muscle cell proliferation	BP	53	4	0.000314011	Cdkn1a, Cdkn1b, Klf4, Trib1
GO:0098978	glutamatergic synapse	CC	508	11	0.00031633	Arc, Arf4, Pcdh8, Rheb, Homer1, Nptx2, Grasp, Dnajb1, Lrrtm2, Ghsr, Ina
GO:0060602	branch elongation of an epithelium	BP	22	3	0.000318248	Areg, Yap1, Spry2
GO:0050807	regulation of synapse organization	BP	277	8	0.000324076	Arc, Arf4, Bdnf, Pcdh8, Rheb, Homer1, Lrrtm2, Ghsr
GO:0004725	protein tyrosine phosphatase activity	MF	97	5	0.000331784	Ptp4a1, Dusp1, Dusp6, Dusp5, Dusp4
GO:0001570	vasculogenesis	BP	97	5	0.000331784	Junb, Cited2, Yap1, Fbxw7, Tiparp
GO:0048534	hematopoietic or lymphoid organ development	BP	972	16	0.000337249	Bcl2l11, Casp3, Egr1, Egr3, Fos, Jun, Junb, Klf4, Smad7, Cited2, Gadd45g, Fbxw7, Tob2, Tiparp, Trib1, Irf2bp2
GO:0004860	protein kinase inhibitor activity	MF	54	4	0.000337522	Casp3, Cdkn1a, Cdkn1b, Trib1
GO:0042327	positive regulation of phosphorylation	BP	1073	17	0.000341353	Areg, Bdnf, Ccnk, Cdkn1a, Cdkn1b, Egr1, Ccn1, Jun, Ppp1r15a, Gadd45b, Ptgs2, Ranbp2, Gadd45g, Spry2, Fbxw7, Rap2a, Alkal2
GO:1901342	regulation of vasculature development	BP	354	9	0.000353226	Adamts1, Btg1, Egr1, Klf4, Ptgs2, Plk2, Spry2, Fbxw7, Ghsr
GO:0042592	homeostatic process	BP	1943	25	0.000353531	Bcl2l11, Casp3, Egr1, Fth1, Gpr3, Krt16, Smad7, Cited2, Mt1, Nr4a3, Pcna, Ptgs2, Rheb, Sgk1, Tra2b, Slc16a1, Yap1, Gadd45g, Homer1, Tinf2, Fbxw7, Pmaip1, Tnfrsf23, Kdm6b, Vgf
GO:0005525	GTP binding	MF	355	9	0.000360535	Arf4, Rasd1, Rheb, Rasl11a, Rasl11b, Arl5b, Rap2a, Arl4d, Gmppb
GO:0062012	regulation of small molecule metabolic process	BP	355	9	0.000360535	Egr1, Sik1, Nr4a3, Ptgs2, Ranbp2, Arpp19, Midn, Ghsr, Irs2
GO:0071276	cellular response to cadmium ion	BP	23	3	0.000364341	Fos, Jun, Mt1
GO:0034405	response to fluid shear stress	BP	23	3	0.000364341	Klf4, Cited2, Ptgs2
GO:0061574	ASAP complex	CC	5	2	0.000367567	Sap18, Sap18b
GO:1903804	glycine import across plasma membrane	BP	5	2	0.000367567	Rgs2, Rgs4
GO:1990441	negative regulation of transcription from RNA polymerase ...	BP	5	2	0.000367567	Jun, Ppp1r15a
GO:1901698	response to nitrogen compound	BP	980	16	0.000368883	Casp3, Egr1, Egr2, Nr4a1, Nr4a3, Nr4a2, Per1, Rgs4, Sgk1, Homer1, Spaar, Ndel1, Eprs, Ghsr, Vgf, Irs2
GO:1902893	regulation of pri-miRNA transcription by RNA polymerase I...	BP	56	4	0.000388281	Egr1, Fos, Jun, Klf4
GO:0060322	head development	BP	699	13	0.000396721	Btg2, Egr2, Foxg1, Nr4a3, Nr4a2, Tra2b, Zfand5, Aldh1a3, Ndel1, Tiparp, Csrnp1, Kdm6b, Irs2
GO:0031668	cellular response to extracellular stimulus	BP	217	7	0.000397062	Atf3, Cdkn1a, Fos, Jun, Sik1, Nr4a2, Wdr45b
GO:0001704	formation of primary germ layer	BP	101	5	0.000399842	Nr4a3, Dusp1, Kdm6b, Dusp5, Dusp4
GO:0009887	animal organ morphogenesis	BP	1090	17	0.000408191	Adamts1, Areg, Bdnf, Bcl2l11, Foxg1, Ccn1, Jun, Smad7, Cited2, Nr4a3, Yap1, Zfand5, Spry2, Aldh1a3, Errfi1, Tiparp, Csrnp1
GO:0021543	pallium development	BP	156	6	0.000411109	Btg2, Foxg1, Nr4a3, Tra2b, Ndel1, Kdm6b
GO:0045736	negative regulation of cyclin-dependent protein serine/th...	BP	24	3	0.00041452	Casp3, Cdkn1a, Cdkn1b
GO:0032550	purine ribonucleoside binding	MF	362	9	0.000415272	Arf4, Rasd1, Rheb, Rasl11a, Rasl11b, Arl5b, Rap2a, Arl4d, Gmppb
GO:0002573	myeloid leukocyte differentiation	BP	219	7	0.000419479	Fos, Jun, Junb, Cited2, Fbxw7, Tob2, Trib1
GO:0050803	regulation of synapse structure or activity	BP	289	8	0.000429509	Arc, Arf4, Bdnf, Pcdh8, Rheb, Homer1, Lrrtm2, Ghsr
GO:0032549	ribonucleoside binding	MF	365	9	0.000440739	Arf4, Rasd1, Rheb, Rasl11a, Rasl11b, Arl5b, Rap2a, Arl4d, Gmppb
GO:0061614	pri-miRNA transcription by RNA polymerase II	BP	58	4	0.000444271	Egr1, Fos, Jun, Klf4
GO:0001934	positive regulation of protein phosphorylation	BP	997	16	0.000444716	Areg, Bdnf, Ccnk, Cdkn1a, Cdkn1b, Egr1, Ccn1, Jun, Ppp1r15a, Gadd45b, Ptgs2, Gadd45g, Spry2, Fbxw7, Rap2a, Alkal2
GO:0001883	purine nucleoside binding	MF	366	9	0.000449508	Arf4, Rasd1, Rheb, Rasl11a, Rasl11b, Arl5b, Rap2a, Arl4d, Gmppb
GO:0051336	regulation of hydrolase activity	BP	998	16	0.000449567	Arf4, Bcl2l11, Nr4a1, Ccn1, Klf4, Ppp1r15a, Pcna, Ptgs2, Rgs2, Rgs4, Siah2, Spry2, Pmaip1, Tnfrsf23, Dnajb1, Ndel1
GO:2000058	regulation of ubiquitin-dependent protein catabolic proce...	BP	159	6	0.000454834	Plk3, Smad7, Plk2, Fbxw7, Nop53, Trib1
GO:0045732	positive regulation of protein catabolic process	BP	222	7	0.00045499	Plk3, Smad7, Plk2, Fbxw7, Nop53, Tiparp, Trib1
GO:0019210	kinase inhibitor activity	MF	59	4	0.00047432	Casp3, Cdkn1a, Cdkn1b, Trib1
GO:0010631	epithelial cell migration	BP	295	8	0.000491819	Egr3, Nr4a1, Jun, Klf4, Krt16, Ptgs2, Plk2, Fbxw7
GO:0009416	response to light stimulus	BP	295	8	0.000491819	Casp3, Cdkn1a, Sik1, Pcna, Per1, Sgk1, Fbxw7, Pmaip1
GO:0033135	regulation of peptidyl-serine phosphorylation	BP	162	6	0.000502104	Bdnf, Smad7, Ppp1r15a, Ptgs2, Spry2, Inpp5f
GO:0060324	face development	BP	60	4	0.00050579	Zfand5, Aldh1a3, Tiparp, Csrnp1
GO:0090132	epithelium migration	BP	297	8	0.000514147	Egr3, Nr4a1, Jun, Klf4, Krt16, Ptgs2, Plk2, Fbxw7
GO:0016311	dephosphorylation	BP	373	9	0.000515	Ppp1r15a, Ptp4a1, Dusp1, Arpp19, Dusp6, Plpp6, Inpp5f, Dusp5, Dusp4
GO:0043025	neuronal cell body	CC	720	13	0.000523389	Bdnf, Casp3, Plk3, Kcnj2, Rheb, Siah2, Homer1, Pard6a, C9orf72, Dnajb1, Ndel1, Inpp5f, Vgf
GO:1901653	cellular response to peptide	BP	298	8	0.000525615	Nr4a1, Nr4a3, Nr4a2, Sgk1, Ndel1, Eprs, Ghsr, Irs2
GO:0014898	cardiac muscle hypertrophy in response to stress	BP	26	3	0.000527718	Mlip, Errfi1, Inpp5f
GO:0003299	muscle hypertrophy in response to stress	BP	26	3	0.000527718	Mlip, Errfi1, Inpp5f
GO:1904030	negative regulation of cyclin-dependent protein kinase ac...	BP	26	3	0.000527718	Casp3, Cdkn1a, Cdkn1b
GO:0044342	type B pancreatic cell proliferation	BP	26	3	0.000527718	Nr4a1, Nr4a3, Errfi1
GO:0007267	cell-cell signaling	BP	1655	22	0.000530033	Arc, Bdnf, Egr1, Egr3, Emd, Klf4, Pcdh8, Ptgs2, Rgs4, Siah2, Slc16a1, Plk2, Yap1, Homer1, Nptx2, Midn, Lrrtm2, Ghsr, Npas4, Vgf, Irs2, Mir132
GO:0001882	nucleoside binding	MF	375	9	0.000535087	Arf4, Rasd1, Rheb, Rasl11a, Rasl11b, Arl5b, Rap2a, Arl4d, Gmppb
GO:0051649	establishment of localization in cell	BP	1999	25	0.000536428	Arc, Arf4, Cdkn1a, Cenpa, Plk3, Egr2, Emd, Kcnj2, Nefl, Nr4a3, Ptgs2, Ranbp2, Srp14, Spry2, Fbxw7, Grasp, Pmaip1, Atp5d, Chmp1b, Arl5b, Arl4d, Ndel1, Inpp5f, Kif18a, Ythdc1
GO:0090130	tissue migration	BP	299	8	0.00053729	Egr3, Nr4a1, Jun, Klf4, Krt16, Ptgs2, Plk2, Fbxw7
GO:0048661	positive regulation of smooth muscle cell proliferation	BP	108	5	0.00054366	Adamts1, Egr1, Jun, Nr4a3, Ptgs2
GO:0031428	box C/D snoRNP complex	CC	6	2	0.000549129	Fbl, Snu13
GO:0001651	dense fibrillar component	CC	6	2	0.000549129	Fbl, Snu13
GO:1903243	negative regulation of cardiac muscle hypertrophy in resp...	BP	6	2	0.000549129	Mlip, Errfi1
GO:0033157	regulation of intracellular protein transport	BP	230	7	0.00056153	Plk3, Emd, Ptgs2, Fbxw7, Grasp, Pmaip1, Ndel1
GO:0008047	enzyme activator activity	MF	460	10	0.00057302	Casp3, Ccnk, Cdkn1a, Jun, Ranbp2, Rgs2, Rgs4, Spry2, Dnajb1, Alkal2
GO:0019001	guanyl nucleotide binding	MF	379	9	0.000577193	Arf4, Rasd1, Rheb, Rasl11a, Rasl11b, Arl5b, Rap2a, Arl4d, Gmppb
GO:0032561	guanyl ribonucleotide binding	MF	379	9	0.000577193	Arf4, Rasd1, Rheb, Rasl11a, Rasl11b, Arl5b, Rap2a, Arl4d, Gmppb
GO:0014887	cardiac muscle adaptation	BP	27	3	0.000591019	Mlip, Errfi1, Inpp5f
GO:0071480	cellular response to gamma radiation	BP	27	3	0.000591019	Cdkn1a, Egr1, Yap1
GO:0048667	cell morphogenesis involved in neuron differentiation	BP	638	12	0.000599961	Arc, Bdnf, Egr2, Foxg1, Ifrd1, Nefl, Nr4a3, Nr4a2, Sgk1, C9orf72, Rap2a, Ndel1
GO:1901699	cellular response to nitrogen compound	BP	638	12	0.000599961	Casp3, Egr1, Nr4a1, Nr4a3, Nr4a2, Rgs4, Sgk1, Spaar, Ndel1, Eprs, Ghsr, Irs2
GO:0030097	hemopoiesis	BP	925	15	0.000603224	Casp3, Egr1, Egr3, Fos, Jun, Junb, Klf4, Smad7, Cited2, Gadd45g, Fbxw7, Tob2, Tiparp, Trib1, Irf2bp2
GO:0016358	dendrite development	BP	305	8	0.000611827	Arc, Arf4, Bdnf, Sgk1, Plk2, Rap2a, Mir132, Mir212
GO:0008544	epidermis development	BP	305	8	0.000611827	Casp3, Fosl2, Klf4, Krt16, Maff, Ptgs2, Yap1, Errfi1
GO:0006886	intracellular protein transport	BP	927	15	0.000616663	Arf4, Cdkn1a, Plk3, Egr2, Emd, Ptgs2, Ranbp2, Srp14, Fbxw7, Grasp, Pmaip1, Arl5b, Arl4d, Ndel1, Ythdc1
GO:0031625	ubiquitin protein ligase binding	MF	306	8	0.000625025	Cdkn1a, Egr2, Jun, Smad7, Per1, Ubc, Fbxw7, Trib1
GO:0007179	transforming growth factor beta receptor signaling pathwa...	BP	169	6	0.000627288	Fos, Jun, Smad7, Cited2, Spry2, Rasl11b
GO:0071702	organic substance transport	BP	2499	29	0.000633338	Arc, Arf4, Bdnf, Cdkn1a, Plk3, Egr2, Emd, Nr4a3, Ptgs2, Ranbp2, Rgs2, Rgs4, Slc16a1, Srp14, Fbxw7, Grasp, Pard6a, Pmaip1, Midn, Chmp1b, Arl5b, Arl4d, Ndel1, Eprs, Ghsr, Kif18a, Ythdc1, Vgf, Irs2
GO:0002520	immune system development	BP	1031	16	0.000637376	Bcl2l11, Casp3, Egr1, Egr3, Fos, Jun, Junb, Klf4, Smad7, Cited2, Gadd45g, Fbxw7, Tob2, Tiparp, Trib1, Irf2bp2
GO:0003824	catalytic activity	MF	5648	53	0.000640329	Adamts1, Gla, Auh, Casp3, Ccnk, Cdk11b, Cdkn1a, Plk3, Egr2, Fbl, Fth1, Mest, Sik1, Pcna, Piga, Ptgs2, Ptp4a1, Dusp1, Ranbp2, Rasd1, Rheb, Sgk1, Siah2, St8sia4, Plk2, Impdh2, B3galt2, Ddx3y, Hspa14, Fbxw7, Tulp2, Aldh1a3, Atp5d, Dusp6, Rasl11a, Rasl11b, Otud1, Josd1, Plpp6, Rap2a, Ndel1, Tiparp, Inpp5f, Eprs, Tyw3, Tent5a, Kdm6b, Kif18a, Blvrb, Dusp5, Ovca2, Dusp4, Gmppb
GO:0048008	platelet-derived growth factor receptor signaling pathway	BP	64	4	0.000646623	Nr4a3, Zfand5, Tiparp, Csrnp1
GO:0001503	ossification	BP	386	9	0.000657398	Areg, Egr2, Ccn1, Junb, Jund, Smad7, Ptgs2, Tob2, Mn1
GO:0036477	somatodendritic compartment	CC	1036	16	0.000671004	Arc, Arf4, Bdnf, Casp3, Plk3, Kcnj2, Rheb, Siah2, Plk2, Homer1, Pard6a, C9orf72, Dnajb1, Ndel1, Inpp5f, Vgf
GO:0045937	positive regulation of phosphate metabolic process	BP	1143	17	0.000694289	Areg, Bdnf, Ccnk, Cdkn1a, Cdkn1b, Egr1, Ccn1, Jun, Ppp1r15a, Gadd45b, Ptgs2, Ranbp2, Gadd45g, Spry2, Fbxw7, Rap2a, Alkal2
GO:0010562	positive regulation of phosphorus metabolic process	BP	1143	17	0.000694289	Areg, Bdnf, Ccnk, Cdkn1a, Cdkn1b, Egr1, Ccn1, Jun, Ppp1r15a, Gadd45b, Ptgs2, Ranbp2, Gadd45g, Spry2, Fbxw7, Rap2a, Alkal2
GO:0032993	protein-DNA complex	CC	173	6	0.000708955	Cenpa, Fos, Jund, Tinf2, H3c7, H3c6
GO:1903320	regulation of protein modification by small protein conju...	BP	240	7	0.000721636	Egr1, Smad7, Siah2, Fbxw7, Rassf1, Nop53, Trib1
GO:0001890	placenta development	BP	174	6	0.000730601	Cdkn1b, Ccn1, Junb, Cited2, Ptgs2, Ghsr
GO:0030291	protein serine/threonine kinase inhibitor activity	MF	29	3	0.000731713	Casp3, Cdkn1a, Cdkn1b
GO:0007176	regulation of epidermal growth factor-activated receptor ...	BP	29	3	0.000731713	Areg, Fbxw7, Errfi1
GO:0043583	ear development	BP	241	7	0.000739449	Bdnf, Bcl2l11, Cdkn1b, Foxg1, Nr4a3, Spry2, Aldh1a3
GO:0007369	gastrulation	BP	175	6	0.000752755	Klf4, Nr4a3, Dusp1, Kdm6b, Dusp5, Dusp4
GO:0042802	identical protein binding	MF	2165	26	0.000753411	Gla, Atf3, Nr4a1, Jun, Kcnj2, Nefl, Nr4a3, Pcna, Ptgs2, Tra2b, Slc16a1, Gadd45g, Impdh2, Homer1, Fbxw7, Grasp, Rassf1, Aldh1a3, Chmp1b, Nop53, Ndel1, Inpp5f, Eprs, Ghsr, Arid5a, Kctd12
GO:0044877	protein-containing complex binding	MF	1476	20	0.000757362	Bcl2l11, Casp3, Cdkn1a, Cdkn1b, Fbl, Fos, Ccn1, Jun, Smad7, Nefl, Pcna, Slc25a3, Plk2, Homer1, Tulp2, Atp5d, Ndel1, Npas4, Ina, Irs2
GO:0030054	cell junction	CC	2049	25	0.000765287	Arc, Arf4, Bdnf, Kcnj2, Smad7, Nefl, Pcdh8, Rheb, Rpl9, Slc16a1, Homer1, Pvr, Nptx2, Grasp, Pard6a, Dnajb1, Ndel1, Lrrtm2, Ghsr, Ina, Blvrb, Kctd12, Frmd6, Vgf, Mir132
GO:0060449	bud elongation involved in lung branching	BP	7	2	0.000765685	Yap1, Spry2
GO:0031264	death-inducing signaling complex	CC	7	2	0.000765685	Casp3, Tnfrsf23
GO:0008627	intrinsic apoptotic signaling pathway in response to osmo...	BP	7	2	0.000765685	Casp3, Ptgs2
GO:0010616	negative regulation of cardiac muscle adaptation	BP	7	2	0.000765685	Mlip, Errfi1
GO:2000271	positive regulation of fibroblast apoptotic process	BP	7	2	0.000765685	Bcl2l11, Btg1
GO:0050808	synapse organization	BP	478	10	0.000768528	Arc, Arf4, Bdnf, Nefl, Pcdh8, Rheb, Homer1, Lrrtm2, Ghsr, Npas4
GO:0060419	heart growth	BP	117	5	0.000781854	Cited2, Rgs2, Rgs4, Yap1, Dusp6
GO:2000278	regulation of DNA biosynthetic process	BP	117	5	0.000781854	Cdkn1a, Klf4, Pcna, Dusp1, Tinf2
GO:0021537	telencephalon development	BP	244	7	0.000794984	Btg2, Foxg1, Nr4a3, Tra2b, Aldh1a3, Ndel1, Kdm6b
GO:0045765	regulation of angiogenesis	BP	318	8	0.000802116	Adamts1, Btg1, Klf4, Ptgs2, Plk2, Spry2, Fbxw7, Ghsr
GO:0098918	structural constituent of synapse	MF	30	3	0.000809371	Nefl, Homer1, Ina
GO:0048729	tissue morphogenesis	BP	663	12	0.000837455	Areg, Ccn1, Klf4, Krt16, Smad7, Cited2, Nr4a3, Pcdh8, Yap1, Spry2, Aldh1a3, Kdm6b
GO:0048168	regulation of neuronal synaptic plasticity	BP	69	4	0.000859163	Arc, Bdnf, Egr1, Vgf
GO:0001659	temperature homeostasis	BP	180	6	0.000871423	Egr1, Gpr3, Ptgs2, Rheb, Gadd45g, Kdm6b
GO:0062197	cellular response to chemical stress	BP	323	8	0.000886888	Casp3, Fos, Jun, Nr4a3, Nr4a2, Ptgs2, Fbxw7, Kdm6b
GO:0030332	cyclin binding	MF	31	3	0.000892074	Cdkn1a, Cdkn1b, Fbxw7
GO:0000132	establishment of mitotic spindle orientation	BP	31	3	0.000892074	Cenpa, Spry2, Ndel1
GO:0055022	negative regulation of cardiac muscle tissue growth	BP	31	3	0.000892074	Cited2, Rgs2, Rgs4
GO:0061117	negative regulation of heart growth	BP	31	3	0.000892074	Cited2, Rgs2, Rgs4
GO:0044389	ubiquitin-like protein ligase binding	MF	324	8	0.000904675	Cdkn1a, Egr2, Jun, Smad7, Per1, Ubc, Fbxw7, Trib1
GO:0045444	fat cell differentiation	BP	250	7	0.000915929	Egr2, Nr4a1, Klf4, Nr4a3, Nr4a2, Ptgs2, Rgs2
GO:1901215	negative regulation of neuron death	BP	250	7	0.000915929	Bdnf, Btg2, Jun, Mt1, Nefl, Nr4a3, Nr4a2
GO:0007098	centrosome cycle	BP	122	5	0.000943853	Slc16a1, Plk2, Pard6a, Chmp1b, Ndel1
GO:0000082	G1/S transition of mitotic cell cycle	BP	183	6	0.000949241	Adamts1, Cdkn1a, Cdkn1b, Plk3, Klf4, Plk2
GO:0010720	positive regulation of cell development	BP	673	12	0.000952277	Adamts1, Bdnf, Egr2, Foxg1, Smad7, Nefl, Rgs2, Rheb, Sgk1, Ndel1, Trib1, Alkal2
GO:0007492	endoderm development	BP	71	4	0.000956515	Arc, Dusp1, Dusp5, Dusp4
GO:0032386	regulation of intracellular transport	BP	327	8	0.000959759	Plk3, Emd, Ptgs2, Fbxw7, Grasp, Pmaip1, Ndel1, Inpp5f
GO:0005102	signaling receptor binding	MF	1732	22	0.000962583	Gla, Areg, Arf4, Bdnf, Casp3, Nr4a1, Ccn1, Jund, Smad7, Nr4a3, Nr4a2, Pcna, Scg2, Homer1, Tob2, Arpp19, Rasl11b, Lrrtm2, Arid5a, Vgf, Irs2, Alkal2
GO:0006979	response to oxidative stress	BP	408	9	0.000970792	Casp3, Plk3, Fos, Jun, Nr4a3, Nr4a2, Ptgs2, Fbxw7, Kdm6b
GO:0046907	intracellular transport	BP	1396	19	0.00097614	Arf4, Cdkn1a, Plk3, Egr2, Emd, Nefl, Ptgs2, Ranbp2, Srp14, Fbxw7, Grasp, Pmaip1, Atp5d, Chmp1b, Arl5b, Arl4d, Ndel1, Inpp5f, Ythdc1
GO:0018105	peptidyl-serine phosphorylation	BP	329	8	0.000997952	Bdnf, Smad7, Ppp1r15a, Ptgs2, Sgk1, Plk2, Spry2, Inpp5f
GO:0010564	regulation of cell cycle process	BP	585	11	0.00101174	Adamts1, Cdk11b, Cdkn1a, Cdkn1b, Plk3, Gpr3, Klf4, Plk2, Rassf1, Chmp1b, Nop53
GO:0140212	regulation of long-chain fatty acid import into cell	BP	8	2	0.0010168	Eprs, Irs2
GO:0051403	stress-activated MAPK cascade	BP	256	7	0.00105094	Gadd45b, Per1, Dusp1, Gadd45g, Rap2a, Tnfrsf23, Trib1
GO:0007422	peripheral nervous system development	BP	73	4	0.00106138	Bdnf, Egr2, Egr3, Cited2
GO:0032891	negative regulation of organic acid transport	BP	33	3	0.00107312	Rgs2, Rgs4, Irs2
GO:0048738	cardiac muscle tissue development	BP	257	7	0.00107488	Smad7, Cited2, Sik1, Rgs2, Rgs4, Yap1, Kdm6b
GO:0071887	leukocyte apoptotic process	BP	126	5	0.00109044	Bcl2l11, Nr4a3, Tnfrsf23, Ghsr, Irs2
GO:0061136	regulation of proteasomal protein catabolic process	BP	189	6	0.00112083	Plk3, Smad7, Plk2, Fbxw7, Nop53, Trib1
GO:0016604	nuclear body	CC	686	12	0.00112091	Bdnf, Cdkn1a, Fbl, Nr4a2, Pcna, Sap18, Sgk1, Tinf2, Cwc25, Mlip, Ythdc1, Sap18b
GO:0005635	nuclear envelope	CC	418	9	0.00114864	Emd, Nr4a1, Ptgs2, Ranbp2, Tra2b, Grasp, Mlip, C9orf72, Ndel1
GO:0070482	response to oxygen levels	BP	260	7	0.0011493	Plk3, Egr1, Fosl2, Cited2, Nr4a2, Nop53, Mir132
GO:0010906	regulation of glucose metabolic process	BP	128	5	0.00116975	Sik1, Ranbp2, Arpp19, Midn, Irs2
GO:0006356	regulation of transcription by RNA polymerase I	BP	34	3	0.0011717	Ppp1r15a, Nop53, Rasl11a
GO:0046686	response to cadmium ion	BP	34	3	0.0011717	Fos, Jun, Mt1
GO:0048812	neuron projection morphogenesis	BP	690	12	0.00117753	Arc, Bdnf, Egr2, Foxg1, Ifrd1, Nefl, Nr4a3, Nr4a2, Sgk1, C9orf72, Rap2a, Ndel1
GO:0006094	gluconeogenesis	BP	76	4	0.00123342	Atf3, Sik1, Ranbp2, Arpp19
GO:0045843	negative regulation of striated muscle tissue development	BP	76	4	0.00123342	Bdnf, Cited2, Rgs2, Rgs4
GO:0002761	regulation of myeloid leukocyte differentiation	BP	130	5	0.00125325	Fos, Jun, Fbxw7, Tob2, Trib1
GO:0040017	positive regulation of locomotion	BP	602	11	0.00127168	Adamts1, Egr1, Ccn1, Jun, Nr4a3, Ptgs2, Ptp4a1, Scg2, Plk2, Spry2, Irs2
GO:0040001	establishment of mitotic spindle localization	BP	35	3	0.00127581	Cenpa, Spry2, Ndel1
GO:0048147	negative regulation of fibroblast proliferation	BP	35	3	0.00127581	Emd, Fth1, Pmaip1
GO:0006471	protein ADP-ribosylation	BP	35	3	0.00127581	Arf4, Tinf2, Tiparp
GO:0009791	post-embryonic development	BP	131	5	0.00129662	Bcl2l11, Klf4, Nr4a2, Tiparp, Csrnp1
GO:0032434	regulation of proteasomal ubiquitin-dependent protein cat...	BP	131	5	0.00129662	Plk3, Smad7, Plk2, Nop53, Trib1
GO:0060136	embryonic process involved in female pregnancy	BP	9	2	0.00130206	Junb, Cited2
GO:1903242	regulation of cardiac muscle hypertrophy in response to s...	BP	9	2	0.00130206	Mlip, Errfi1
GO:0048588	developmental cell growth	BP	266	7	0.00131025	Bdnf, Ifrd1, Smad7, Rgs2, Rgs4, C9orf72, Ndel1
GO:0016791	phosphatase activity	MF	266	7	0.00131025	Ptp4a1, Dusp1, Dusp6, Plpp6, Inpp5f, Dusp5, Dusp4
GO:0052548	regulation of endopeptidase activity	BP	344	8	0.00132483	Bcl2l11, Nr4a1, Ccn1, Klf4, Ptgs2, Siah2, Pmaip1, Tnfrsf23
GO:0048871	multicellular organismal homeostasis	BP	514	10	0.00132535	Egr1, Gpr3, Krt16, Nr4a3, Ptgs2, Rheb, Yap1, Gadd45g, Homer1, Kdm6b
GO:0001667	ameboidal-type cell migration	BP	427	9	0.00133043	Egr3, Nr4a1, Jun, Klf4, Krt16, Ptgs2, Plk2, Zfand5, Fbxw7
GO:0022603	regulation of anatomical structure morphogenesis	BP	1107	16	0.0013392	Adamts1, Arc, Bdnf, Btg1, Ifrd1, Klf4, Cited2, Nefl, Ptgs2, Sgk1, Plk2, Spry2, Fbxw7, Rap2a, Ndel1, Ghsr
GO:0031023	microtubule organizing center organization	BP	132	5	0.00134109	Slc16a1, Plk2, Pard6a, Chmp1b, Ndel1
GO:0016049	cell growth	BP	515	10	0.00134457	Bdnf, Cdkn1a, Cdkn1b, Ifrd1, Smad7, Rgs2, Rgs4, Sgk1, C9orf72, Ndel1
GO:0016051	carbohydrate biosynthetic process	BP	196	6	0.00135003	Atf3, Sik1, Ranbp2, B3galt2, Arpp19, Irs2
GO:0050773	regulation of dendrite development	BP	196	6	0.00135003	Arc, Sgk1, Plk2, Rap2a, Mir132, Mir212
GO:0048635	negative regulation of muscle organ development	BP	78	4	0.00135839	Bdnf, Cited2, Rgs2, Rgs4
GO:0055021	regulation of cardiac muscle tissue growth	BP	78	4	0.00135839	Cited2, Rgs2, Rgs4, Yap1
GO:0031667	response to nutrient levels	BP	346	8	0.00137419	Atf3, Cdkn1a, Jun, Sik1, Slc16a1, Wdr45b, Ghsr, Vgf
GO:0003401	axis elongation	BP	36	3	0.00138556	Areg, Yap1, Spry2
GO:1904707	positive regulation of vascular associated smooth muscle ...	BP	36	3	0.00138556	Adamts1, Jun, Nr4a3
GO:0048679	regulation of axon regeneration	BP	36	3	0.00138556	Klf4, Ndel1, Inpp5f
GO:0120039	plasma membrane bounded cell projection morphogenesis	BP	704	12	0.00139477	Arc, Bdnf, Egr2, Foxg1, Ifrd1, Nefl, Nr4a3, Nr4a2, Sgk1, C9orf72, Rap2a, Ndel1
GO:0071496	cellular response to external stimulus	BP	269	7	0.00139706	Atf3, Cdkn1a, Fos, Jun, Sik1, Nr4a2, Wdr45b
GO:0000904	cell morphogenesis involved in differentiation	BP	803	13	0.00141045	Arc, Bdnf, Egr2, Foxg1, Ifrd1, Nefl, Nr4a3, Nr4a2, Sgk1, C9orf72, Rap2a, Ndel1, Frmd6
GO:0001558	regulation of cell growth	BP	431	9	0.00141835	Bdnf, Cdkn1a, Cdkn1b, Ifrd1, Smad7, Rgs2, Rgs4, Sgk1, Ndel1
GO:0019319	hexose biosynthetic process	BP	79	4	0.00142408	Atf3, Sik1, Ranbp2, Arpp19
GO:0002260	lymphocyte homeostasis	BP	79	4	0.00142408	Bcl2l11, Casp3, Pmaip1, Tnfrsf23
GO:1901862	negative regulation of muscle tissue development	BP	79	4	0.00142408	Bdnf, Cited2, Rgs2, Rgs4
GO:1902806	regulation of cell cycle G1/S phase transition	BP	134	5	0.00143338	Adamts1, Cdkn1a, Cdkn1b, Plk3, Klf4
GO:0001936	regulation of endothelial cell proliferation	BP	134	5	0.00143338	Egr3, Nr4a1, Jun, Scg2, Ghsr
GO:0099173	postsynapse organization	BP	199	6	0.00145853	Arc, Arf4, Rheb, Homer1, Lrrtm2, Ghsr
GO:0051345	positive regulation of hydrolase activity	BP	521	10	0.00146469	Arf4, Bcl2l11, Ccn1, Ppp1r15a, Pcna, Rgs4, Pmaip1, Tnfrsf23, Dnajb1, Ndel1
GO:0048858	cell projection morphogenesis	BP	709	12	0.00147997	Arc, Bdnf, Egr2, Foxg1, Ifrd1, Nefl, Nr4a3, Nr4a2, Sgk1, C9orf72, Rap2a, Ndel1
GO:0051294	establishment of spindle orientation	BP	37	3	0.00150107	Cenpa, Spry2, Ndel1
GO:2000273	positive regulation of signaling receptor activity	BP	37	3	0.00150107	Arc, Areg, Fbxw7
GO:0071214	cellular response to abiotic stimulus	BP	273	7	0.00151974	Casp3, Cdkn1a, Egr1, Pcna, Ptgs2, Yap1, Fbxw7
GO:0104004	cellular response to environmental stimulus	BP	273	7	0.00151974	Casp3, Cdkn1a, Egr1, Pcna, Ptgs2, Yap1, Fbxw7
GO:0010565	regulation of cellular ketone metabolic process	BP	136	5	0.00153027	Egr1, Nr4a3, Ptgs2, Ghsr, Irs2
GO:0009411	response to UV	BP	136	5	0.00153027	Casp3, Cdkn1a, Pcna, Fbxw7, Pmaip1
GO:0042578	phosphoric ester hydrolase activity	MF	352	8	0.00153109	Ptp4a1, Dusp1, Tulp2, Dusp6, Plpp6, Inpp5f, Dusp5, Dusp4
GO:0044843	cell cycle G1/S phase transition	BP	201	6	0.00153448	Adamts1, Cdkn1a, Cdkn1b, Plk3, Klf4, Plk2
GO:0070507	regulation of microtubule cytoskeleton organization	BP	201	6	0.00153448	Cdkn1b, Sgk1, Plk2, Rassf1, Chmp1b, Kif18a
GO:0000302	response to reactive oxygen species	BP	201	6	0.00153448	Casp3, Plk3, Fos, Jun, Nr4a3, Kdm6b
GO:0005730	nucleolus	CC	811	13	0.00153962	Atf3, Cdkn1a, Plk3, Fbl, Smad7, Snu13, Fbxw7, Midn, Nop53, Rasl11a, Taf13, Spty2d1, Arid5a
GO:0060560	developmental growth involved in morphogenesis	BP	274	7	0.00155169	Areg, Bdnf, Ifrd1, Yap1, Spry2, C9orf72, Ndel1
GO:0006006	glucose metabolic process	BP	202	6	0.00157356	Atf3, Sik1, Ranbp2, Arpp19, Midn, Irs2
GO:0018209	peptidyl-serine modification	BP	354	8	0.00158644	Bdnf, Smad7, Ppp1r15a, Ptgs2, Sgk1, Plk2, Spry2, Inpp5f
GO:0044297	cell body	CC	814	13	0.00159053	Bdnf, Casp3, Plk3, Kcnj2, Rheb, Siah2, Homer1, Pard6a, C9orf72, Dnajb1, Ndel1, Inpp5f, Vgf
GO:0000185	activation of MAPKKK activity	BP	10	2	0.00162103	Gadd45b, Gadd45g
GO:1903749	positive regulation of establishment of protein localizat...	BP	10	2	0.00162103	Fbxw7, Pmaip1
GO:0010612	regulation of cardiac muscle adaptation	BP	10	2	0.00162103	Mlip, Errfi1
GO:0033131	regulation of glucokinase activity	BP	10	2	0.00162103	Ranbp2, Midn
GO:1902746	regulation of lens fiber cell differentiation	BP	10	2	0.00162103	Cdkn1b, Spry2
GO:0001706	endoderm formation	BP	38	3	0.00162245	Dusp1, Dusp5, Dusp4
GO:0051953	negative regulation of amine transport	BP	38	3	0.00162245	Rgs2, Rgs4, Ghsr
GO:0009311	oligosaccharide metabolic process	BP	38	3	0.00162245	Gla, St8sia4, B3galt2
GO:0003712	transcription coregulator activity	MF	440	9	0.00163332	Btg2, Cited2, Yap1, Tob2, Sap30, Mlip, Dnajb1, Arid5a, Irf2bp2
GO:0050805	negative regulation of synaptic transmission	BP	82	4	0.00163439	Arc, Bdnf, Ptgs2, Plk2
GO:0045787	positive regulation of cell cycle	BP	357	8	0.00167243	Adamts1, Bcl2l11, Cdkn1a, Cdkn1b, Foxg1, Cited2, Nr4a3, Rassf1
GO:0007178	transmembrane receptor protein serine/threonine kinase si...	BP	357	8	0.00167243	Egr1, Fos, Ccn1, Jun, Smad7, Cited2, Spry2, Rasl11b
GO:1903322	positive regulation of protein modification by small prot...	BP	139	5	0.00168452	Smad7, Fbxw7, Rassf1, Nop53, Trib1
GO:0006664	glycolipid metabolic process	BP	83	4	0.00170903	Gla, Piga, St8sia4, B3galt2
GO:0043154	negative regulation of cysteine-type endopeptidase activi...	BP	83	4	0.00170903	Nr4a1, Klf4, Ptgs2, Siah2
GO:0030295	protein kinase activator activity	MF	83	4	0.00170903	Ccnk, Cdkn1a, Spry2, Alkal2
GO:0032526	response to retinoic acid	BP	83	4	0.00170903	Klf4, Mest, Yap1, Ovca2
GO:1902554	serine/threonine protein kinase complex	CC	83	4	0.00170903	Ccnk, Cdkn1a, Pcna, C9orf72
GO:0071560	cellular response to transforming growth factor beta stim...	BP	206	6	0.00173753	Fos, Jun, Smad7, Cited2, Spry2, Rasl11b
GO:1904018	positive regulation of vasculature development	BP	206	6	0.00173753	Btg1, Egr1, Klf4, Ptgs2, Plk2, Ghsr
GO:0001666	response to hypoxia	BP	206	6	0.00173753	Plk3, Egr1, Fosl2, Cited2, Nr4a2, Nop53
GO:0030522	intracellular receptor signaling pathway	BP	207	6	0.00178047	Bdnf, Cited2, Per1, Yap1, Aldh1a3, Nop53
GO:0042995	cell projection	CC	2547	28	0.00178103	Arc, Arf4, Bdnf, Plk3, Fos, Gpr19, Kcnj2, Nefl, Pcdh8, Ptgs2, Rgs2, Rheb, Sgk1, Siah2, Plk2, Spry2, Homer1, Pard6a, Tulp2, C9orf72, Dnajb1, Ndel1, Inpp5f, Ghsr, Kif18a, Blvrb, Kctd12, Vgf
GO:0033613	activating transcription factor binding	MF	84	4	0.00178601	Egr2, Fos, Jun, Cited2
GO:1903509	liposaccharide metabolic process	BP	84	4	0.00178601	Gla, Piga, St8sia4, B3galt2
GO:0046332	SMAD binding	MF	84	4	0.00178601	Fos, Jun, Smad7, Cited2
GO:0042180	cellular ketone metabolic process	BP	208	6	0.00182421	Egr1, Nr4a3, Ptgs2, Coq10b, Ghsr, Irs2
GO:1902850	microtubule cytoskeleton organization involved in mitosis	BP	142	5	0.00184989	Cenpa, Plk2, Spry2, Chmp1b, Ndel1
GO:0046364	monosaccharide biosynthetic process	BP	85	4	0.00186536	Atf3, Sik1, Ranbp2, Arpp19
GO:0014910	regulation of smooth muscle cell migration	BP	85	4	0.00186536	Adamts1, Egr1, Nr4a3, Trib1
GO:0038179	neurotrophin signaling pathway	BP	40	3	0.00188322	Bdnf, Casp3, Spry2
GO:1903959	regulation of anion transmembrane transport	BP	40	3	0.00188322	Rgs2, Rgs4, Irs2
GO:0070570	regulation of neuron projection regeneration	BP	40	3	0.00188322	Klf4, Ndel1, Inpp5f
GO:0002376	immune system process	BP	2684	29	0.00190157	Bcl2l11, Casp3, Cdkn1a, Egr1, Egr3, Fos, Jun, Junb, Klf4, Krt16, Smad7, Cited2, Nfil3, Nr4a3, Dusp1, Scg2, Gadd45g, Impdh2, Fbxw7, Tob2, Pmaip1, Nop53, Tnfrsf23, Tiparp, Eprs, Trib1, Arid5a, Irf2bp2, Irs2
GO:0043167	ion binding	MF	5496	50	0.00190863	Adamts1, Arf4, Cdk11b, Cdkn1a, Plk3, Egr1, Egr2, Egr3, Egr4, Fth1, Nr4a1, Ccn1, Kcnj2, Klf4, Smad7, Sik1, Mt1, Nr4a3, Nr4a2, Pcdh8, Ptgs2, Ranbp2, Rasd1, Rheb, Sgk1, Siah2, Plk2, Tpt1, Zfand5, Impdh2, Ddx3y, Hspa14, Nptx2, Rassf1, Aldh1a3, Sap30, Wdr45b, Rasl11a, Rasl11b, Arl5b, Rap2a, Arl4d, Tiparp, Kti12, Eprs, Plpbp, Kdm6b, Kif18a, Irf2bp2, Gmppb
GO:0071559	response to transforming growth factor beta	BP	210	6	0.00191414	Fos, Jun, Smad7, Cited2, Spry2, Rasl11b
GO:0032990	cell part morphogenesis	BP	732	12	0.00192927	Arc, Bdnf, Egr2, Foxg1, Ifrd1, Nefl, Nr4a3, Nr4a2, Sgk1, C9orf72, Rap2a, Ndel1
GO:0048839	inner ear development	BP	211	6	0.00196035	Bdnf, Cdkn1b, Foxg1, Nr4a3, Spry2, Aldh1a3
GO:0090316	positive regulation of intracellular protein transport	BP	144	5	0.00196655	Plk3, Emd, Ptgs2, Fbxw7, Pmaip1
GO:0005883	neurofilament	CC	11	2	0.0019733	Nefl, Ina
GO:2000322	regulation of glucocorticoid receptor signaling pathway	BP	11	2	0.0019733	Bdnf, Per1
GO:1903299	regulation of hexokinase activity	BP	11	2	0.0019733	Ranbp2, Midn
GO:0043542	endothelial cell migration	BP	212	6	0.00200739	Egr3, Nr4a1, Klf4, Ptgs2, Plk2, Fbxw7
GO:0034330	cell junction organization	BP	736	12	0.0020178	Arc, Arf4, Bdnf, Smad7, Nefl, Pcdh8, Rheb, Homer1, Pard6a, Lrrtm2, Ghsr, Npas4
GO:2000279	negative regulation of DNA biosynthetic process	BP	41	3	0.00202281	Cdkn1a, Dusp1, Tinf2
GO:0001655	urogenital system development	BP	370	8	0.00208861	Adamts1, Bdnf, Bcl2l11, Cdkn1b, Egr1, Smad7, Yap1, Tiparp
GO:0043269	regulation of ion transport	BP	742	12	0.00215682	Arc, Kcnj2, Sik1, Per1, Ptgs2, Rgs2, Rgs4, Sgk1, Homer1, Eprs, Kcnf1, Irs2
GO:0006687	glycosphingolipid metabolic process	BP	42	3	0.00216869	Gla, St8sia4, B3galt2
GO:0055026	negative regulation of cardiac muscle tissue development	BP	42	3	0.00216869	Cited2, Rgs2, Rgs4
GO:0051154	negative regulation of striated muscle cell differentiati...	BP	42	3	0.00216869	Bdnf, Rgs2, Rgs4
GO:0048545	response to steroid hormone	BP	216	6	0.00220415	Areg, Bdnf, Per1, Sgk1, Yap1, Npas4
GO:0006672	ceramide metabolic process	BP	89	4	0.00220723	Gla, Ccn1, St8sia4, B3galt2
GO:0044772	mitotic cell cycle phase transition	BP	374	8	0.00223184	Adamts1, Cdkn1a, Cdkn1b, Plk3, Klf4, Plk2, Arpp19, Nop53
GO:0001935	endothelial cell proliferation	BP	149	5	0.00228163	Egr3, Nr4a1, Jun, Scg2, Ghsr
GO:0019209	kinase activator activity	MF	90	4	0.002299	Ccnk, Cdkn1a, Spry2, Alkal2
GO:2000117	negative regulation of cysteine-type endopeptidase activi...	BP	90	4	0.002299	Nr4a1, Klf4, Ptgs2, Siah2
GO:0000307	cyclin-dependent protein kinase holoenzyme complex	CC	43	3	0.00232093	Ccnk, Cdkn1a, Pcna
GO:1903792	negative regulation of anion transport	BP	43	3	0.00232093	Rgs2, Rgs4, Irs2
GO:0046621	negative regulation of organ growth	BP	43	3	0.00232093	Cited2, Rgs2, Rgs4
GO:0033043	regulation of organelle organization	BP	1281	17	0.00234511	Bcl2l11, Cdk11b, Cdkn1b, Gpr3, Rgs4, Sgk1, Plk2, Tinf2, Fbxw7, Rassf1, Pmaip1, Chmp1b, C9orf72, Spty2d1, Lrrtm2, Arid5a, Kif18a
GO:0097193	intrinsic apoptotic signaling pathway	BP	295	7	0.002352	Bcl2l11, Casp3, Cdkn1a, Ptgs2, Tpt1, Fbxw7, Pmaip1
GO:2000253	positive regulation of feeding behavior	BP	12	2	0.00235845	Nr4a3, Ghsr
GO:0032890	regulation of organic acid transport	BP	91	4	0.00239336	Rgs2, Rgs4, Eprs, Irs2
GO:0071478	cellular response to radiation	BP	151	5	0.00241741	Cdkn1a, Egr1, Pcna, Yap1, Fbxw7
GO:0012505	endomembrane system	CC	3908	38	0.00245274	Gla, Arc, Arf4, Bdnf, Cdkn1b, Plk3, Emd, Fos, Nr4a1, Kcnj2, Mest, Ppp1r15a, Piga, Ptgs2, Ptp4a1, Ranbp2, Rasd1, Rheb, Rpl21, Scg2, Sgk1, Siah2, St8sia4, Tra2b, Tpt1, B3galt2, Fbxw7, Grasp, Chmp1b, Mlip, Spaar, C9orf72, Arl5b, Rap2a, Ndel1, Inpp5f, Cnpy1, Vgf
GO:1903050	regulation of proteolysis involved in cellular protein ca...	BP	221	6	0.00247017	Plk3, Smad7, Plk2, Fbxw7, Nop53, Trib1
GO:0048487	beta-tubulin binding	MF	44	3	0.00247963	Emd, Rgs2, Ndel1
GO:0018193	peptidyl-amino acid modification	BP	1177	16	0.00247968	Areg, Bdnf, Egr1, Egr2, Smad7, Ppp1r15a, Per1, Ptgs2, Ranbp2, Sgk1, Plk2, Spry2, Fbxw7, Errfi1, Inpp5f, Arid5a
GO:0014909	smooth muscle cell migration	BP	92	4	0.00249036	Adamts1, Egr1, Nr4a3, Trib1
GO:0030335	positive regulation of cell migration	BP	563	10	0.00257208	Adamts1, Egr1, Ccn1, Jun, Nr4a3, Ptgs2, Ptp4a1, Plk2, Spry2, Irs2
GO:0030900	forebrain development	BP	383	8	0.00258237	Btg2, Foxg1, Nr4a3, Nr4a2, Tra2b, Aldh1a3, Ndel1, Kdm6b
GO:0051259	protein complex oligomerization	BP	223	6	0.00258307	Arc, Kcnj2, Homer1, Aldh1a3, Kctd12, Kcnf1
GO:0006334	nucleosome assembly	BP	93	4	0.00259002	Nap1l5, Spty2d1, H3c7, H3c6
GO:0071774	response to fibroblast growth factor	BP	93	4	0.00259002	Egr3, Nr4a1, Ier2, Spry2
GO:0051293	establishment of spindle localization	BP	45	3	0.00264489	Cenpa, Spry2, Ndel1
GO:0005637	nuclear inner membrane	CC	45	3	0.00264489	Emd, Ptgs2, Tra2b
GO:0010721	negative regulation of cell development	BP	385	8	0.00266581	Bdnf, Foxg1, Ifrd1, Rgs2, Rgs4, Plk2, Fbxw7, Inpp5f
GO:0043535	regulation of blood vessel endothelial cell migration	BP	94	4	0.00269238	Klf4, Ptgs2, Plk2, Fbxw7
GO:0019217	regulation of fatty acid metabolic process	BP	94	4	0.00269238	Nr4a3, Ptgs2, Ghsr, Irs2
GO:0036293	response to decreased oxygen levels	BP	225	6	0.0026998	Plk3, Egr1, Fosl2, Cited2, Nr4a2, Nop53
GO:0045333	cellular respiration	BP	155	5	0.00270644	Bdnf, Nr4a3, Atp5d, Coq10b, Nop53
GO:0007409	axonogenesis	BP	475	9	0.00273064	Bdnf, Egr2, Foxg1, Ifrd1, Nefl, Nr4a3, Nr4a2, C9orf72, Ndel1
GO:0009611	response to wounding	BP	475	9	0.00273064	Casp3, Cdkn1a, Ccn1, Jun, Klf4, Nefl, Yap1, Ndel1, Inpp5f
GO:0051962	positive regulation of nervous system development	BP	665	11	0.00275685	Adamts1, Bdnf, Egr2, Foxg1, Nefl, Rgs2, Rheb, Sgk1, Ndel1, Lrrtm2, Alkal2
GO:0035497	cAMP response element binding	MF	13	2	0.00277606	Jun, Nr4a3
GO:0015816	glycine transport	BP	13	2	0.00277606	Rgs2, Rgs4
GO:0061052	negative regulation of cell growth involved in cardiac mu...	BP	13	2	0.00277606	Rgs2, Rgs4
GO:0031953	negative regulation of protein autophosphorylation	BP	13	2	0.00277606	Jun, Errfi1
GO:0005652	nuclear lamina	CC	13	2	0.00277606	Emd, Pcna
GO:0045741	positive regulation of epidermal growth factor-activated ...	BP	13	2	0.00277606	Areg, Fbxw7
GO:0032486	Rap protein signal transduction	BP	13	2	0.00277606	Plk2, Rap2a
GO:0061418	regulation of transcription from RNA polymerase II promot...	BP	13	2	0.00277606	Egr1, Cited2
GO:0055119	relaxation of cardiac muscle	BP	13	2	0.00277606	Kcnj2, Rgs2
GO:0009267	cellular response to starvation	BP	156	5	0.00278245	Atf3, Cdkn1a, Jun, Sik1, Wdr45b
GO:0006937	regulation of muscle contraction	BP	156	5	0.00278245	Kcnj2, Smad7, Ptgs2, Rgs2, Ghsr
GO:0006629	lipid metabolic process	BP	1303	17	0.00279199	Gla, Auh, Egr1, Ccn1, Sik1, Nr4a3, Piga, Ptgs2, St8sia4, Slc16a1, B3galt2, Aldh1a3, Plpp6, Tiparp, Inpp5f, Ghsr, Irs2
GO:0021954	central nervous system neuron development	BP	95	4	0.00279749	Btg2, Foxg1, Nr4a2, Ndel1
GO:1903827	regulation of cellular protein localization	BP	570	10	0.00280907	Arc, Plk3, Emd, Ptgs2, Fbxw7, Grasp, Pard6a, Pmaip1, Ndel1, Ghsr
GO:0031952	regulation of protein autophosphorylation	BP	46	3	0.0028168	Jun, Errfi1, Rap2a
GO:0044255	cellular lipid metabolic process	BP	975	14	0.00281939	Gla, Auh, Ccn1, Sik1, Nr4a3, Piga, Ptgs2, St8sia4, B3galt2, Aldh1a3, Plpp6, Inpp5f, Ghsr, Irs2
GO:0071383	cellular response to steroid hormone stimulus	BP	157	5	0.00285999	Bdnf, Per1, Sgk1, Yap1, Npas4
GO:0062013	positive regulation of small molecule metabolic process	BP	157	5	0.00285999	Nr4a3, Ptgs2, Arpp19, Ghsr, Irs2
GO:0006508	proteolysis	BP	1655	20	0.00292168	Adamts1, Bcl2l11, Casp3, Plk3, Nr4a1, Ccn1, Klf4, Smad7, Ptgs2, Siah2, Plk2, Ubc, Fbxw7, Pmaip1, Nop53, Fbxo33, Otud1, Josd1, Tnfrsf23, Trib1
GO:1902105	regulation of leukocyte differentiation	BP	307	7	0.00293407	Egr3, Fos, Jun, Smad7, Fbxw7, Tob2, Trib1
GO:0007017	microtubule-based process	BP	875	13	0.00297026	Cdkn1b, Cenpa, Plk3, Nefl, Sgk1, Slc16a1, Plk2, Spry2, Rassf1, Pard6a, Chmp1b, Ndel1, Kif18a
GO:0044087	regulation of cellular component biogenesis	BP	982	14	0.00300527	Bdnf, Bcl2l11, Cdkn1b, Ccn1, Sgk1, Plk2, Chmp1b, Nop53, C9orf72, Dnajb1, Ndel1, Spty2d1, Lrrtm2, Ghsr
GO:0099072	regulation of postsynaptic membrane neurotransmitter rece...	BP	97	4	0.00301606	Arc, Nptx2, Grasp, Ghsr
GO:0008406	gonad development	BP	231	6	0.00307382	Adamts1, Bcl2l11, Cited2, Tiparp, Kif18a, Vgf
GO:0019318	hexose metabolic process	BP	231	6	0.00307382	Atf3, Sik1, Ranbp2, Arpp19, Midn, Irs2
GO:0032872	regulation of stress-activated MAPK cascade	BP	231	6	0.00307382	Gadd45b, Per1, Dusp1, Gadd45g, Rap2a, Tnfrsf23
GO:0021761	limbic system development	BP	98	4	0.0031296	Btg2, Nr4a3, Aldh1a3, Kdm6b
GO:0010332	response to gamma radiation	BP	48	3	0.00318088	Cdkn1a, Egr1, Yap1
GO:0009755	hormone-mediated signaling pathway	BP	161	5	0.00318582	Bdnf, Per1, Sgk1, Yap1, Ghsr
GO:0097191	extrinsic apoptotic signaling pathway	BP	233	6	0.0032067	Atf3, Bcl2l11, Scg2, Siah2, Yap1, Tnfrsf23
GO:0001822	kidney development	BP	312	7	0.00320681	Adamts1, Bdnf, Bcl2l11, Egr1, Smad7, Yap1, Tiparp
GO:0042921	glucocorticoid receptor signaling pathway	BP	14	2	0.00322574	Bdnf, Per1
GO:0071850	mitotic cell cycle arrest	BP	14	2	0.00322574	Cdkn1a, Cdkn1b
GO:0035613	RNA stem-loop binding	MF	14	2	0.00322574	Eprs, Arid5a
GO:0032880	regulation of protein localization	BP	990	14	0.00322991	Arc, Plk3, Emd, Ptgs2, Sgk1, Slc16a1, Fbxw7, Grasp, Pard6a, Pmaip1, Midn, Ndel1, Ghsr, Irs2
GO:0071456	cellular response to hypoxia	BP	99	4	0.00324602	Plk3, Egr1, Cited2, Nop53
GO:1902911	protein kinase complex	CC	99	4	0.00324602	Ccnk, Cdkn1a, Pcna, C9orf72
GO:0001701	in utero embryonic development	BP	488	9	0.00326227	Bcl2l11, Ccnk, Cdk11b, Ccn1, Junb, Maff, Cited2, Zfand5, Ndel1
GO:0010675	regulation of cellular carbohydrate metabolic process	BP	162	5	0.00327129	Sik1, Ranbp2, Arpp19, Midn, Irs2
GO:0006470	protein dephosphorylation	BP	234	6	0.00327472	Ppp1r15a, Dusp1, Arpp19, Dusp6, Dusp5, Dusp4
GO:0030278	regulation of ossification	BP	234	6	0.00327472	Areg, Egr2, Ccn1, Jund, Smad7, Tob2
GO:0070302	regulation of stress-activated protein kinase signaling c...	BP	234	6	0.00327472	Gadd45b, Per1, Dusp1, Gadd45g, Rap2a, Tnfrsf23
GO:0045137	development of primary sexual characteristics	BP	235	6	0.00334382	Adamts1, Bcl2l11, Cited2, Tiparp, Kif18a, Vgf
GO:0003723	RNA binding	MF	1103	15	0.00335223	Arc, Auh, Fbl, Ranbp2, Rpl9, Tra2b, Srp14, Snu13, Impdh2, Ddx3y, Rpl22l1, Nop53, Eprs, Arid5a, Ythdc1
GO:0014888	striated muscle adaptation	BP	49	3	0.00337323	Mlip, Errfi1, Inpp5f
GO:2000147	positive regulation of cell motility	BP	586	10	0.00341667	Adamts1, Egr1, Ccn1, Jun, Nr4a3, Ptgs2, Ptp4a1, Plk2, Spry2, Irs2
GO:2001237	negative regulation of extrinsic apoptotic signaling path...	BP	101	4	0.00348765	Scg2, Siah2, Yap1, Tnfrsf23
GO:2001236	regulation of extrinsic apoptotic signaling pathway	BP	165	5	0.0035376	Atf3, Scg2, Siah2, Yap1, Tnfrsf23
GO:0016607	nuclear speck	CC	318	7	0.0035592	Bdnf, Nr4a2, Sap18, Sgk1, Cwc25, Ythdc1, Sap18b
GO:0002762	negative regulation of myeloid leukocyte differentiation	BP	50	3	0.00357255	Fbxw7, Tob2, Trib1
GO:0008038	neuron recognition	BP	50	3	0.00357255	Bdnf, Casp3, Foxg1
GO:0051438	regulation of ubiquitin-protein transferase activity	BP	50	3	0.00357255	Smad7, Fbxw7, Trib1
GO:0051653	spindle localization	BP	50	3	0.00357255	Cenpa, Spry2, Ndel1
GO:0050769	positive regulation of neurogenesis	BP	590	10	0.00358382	Adamts1, Bdnf, Egr2, Foxg1, Nefl, Rgs2, Rheb, Sgk1, Ndel1, Alkal2
GO:0035418	protein localization to synapse	BP	102	4	0.00361292	Homer1, Nptx2, Grasp, Ghsr
GO:0055024	regulation of cardiac muscle tissue development	BP	102	4	0.00361292	Cited2, Rgs2, Rgs4, Yap1
GO:0043161	proteasome-mediated ubiquitin-dependent protein catabolic...	BP	405	8	0.00362147	Plk3, Smad7, Siah2, Plk2, Fbxw7, Nop53, Fbxo33, Trib1
GO:0071897	DNA biosynthetic process	BP	166	5	0.00362973	Cdkn1a, Klf4, Pcna, Dusp1, Tinf2
GO:0065004	protein-DNA complex assembly	BP	166	5	0.00362973	Cenpa, Nap1l5, Spty2d1, H3c7, H3c6
GO:0140096	catalytic activity, acting on a protein	MF	2177	24	0.00370384	Adamts1, Casp3, Ccnk, Cdk11b, Cdkn1a, Plk3, Egr2, Fbl, Sik1, Ptp4a1, Dusp1, Ranbp2, Sgk1, Siah2, Plk2, Fbxw7, Dusp6, Otud1, Josd1, Ndel1, Tiparp, Kdm6b, Dusp5, Dusp4
GO:0031958	corticosteroid receptor signaling pathway	BP	15	2	0.00370708	Bdnf, Per1
GO:0006677	glycosylceramide metabolic process	BP	15	2	0.00370708	Gla, B3galt2
GO:0010958	regulation of amino acid import across plasma membrane	BP	15	2	0.00370708	Rgs2, Rgs4
GO:1903789	regulation of amino acid transmembrane transport	BP	15	2	0.00370708	Rgs2, Rgs4
GO:0045834	positive regulation of lipid metabolic process	BP	167	5	0.00372357	Ccn1, Nr4a3, Ptgs2, Ghsr, Irs2
GO:0030099	myeloid cell differentiation	BP	407	8	0.00372997	Casp3, Fos, Jun, Junb, Cited2, Fbxw7, Tob2, Trib1
GO:0007173	epidermal growth factor receptor signaling pathway	BP	103	4	0.00374122	Areg, Arf4, Fbxw7, Errfi1
GO:1902106	negative regulation of leukocyte differentiation	BP	104	4	0.00387257	Smad7, Fbxw7, Tob2, Trib1
GO:0048568	embryonic organ development	BP	503	9	0.00397367	Foxg1, Ccn1, Junb, Cited2, Nr4a3, Tra2b, Yap1, Spry2, Aldh1a3
GO:0045933	positive regulation of muscle contraction	BP	52	3	0.00399243	Ptgs2, Rgs2, Ghsr
GO:0051271	negative regulation of cellular component movement	BP	325	7	0.00400679	Cdkn1b, Klf4, Krt16, Cited2, Dusp1, Rap2a, Trib1
GO:0040013	negative regulation of locomotion	BP	325	7	0.00400679	Klf4, Krt16, Cited2, Dusp1, Rap2a, Ghsr, Trib1
GO:0004721	phosphoprotein phosphatase activity	MF	170	5	0.00401553	Ptp4a1, Dusp1, Dusp6, Dusp5, Dusp4
GO:0044770	cell cycle phase transition	BP	413	8	0.00407062	Adamts1, Cdkn1a, Cdkn1b, Plk3, Klf4, Plk2, Arpp19, Nop53
GO:0120025	plasma membrane bounded cell projection	CC	2319	25	0.00407919	Arc, Arf4, Bdnf, Plk3, Fos, Gpr19, Kcnj2, Nefl, Ptgs2, Rgs2, Rheb, Sgk1, Siah2, Plk2, Homer1, Pard6a, Tulp2, C9orf72, Dnajb1, Ndel1, Inpp5f, Ghsr, Kif18a, Blvrb, Vgf
GO:0072001	renal system development	BP	327	7	0.00414218	Adamts1, Bdnf, Bcl2l11, Egr1, Smad7, Yap1, Tiparp
GO:0014812	muscle cell migration	BP	106	4	0.00414458	Adamts1, Egr1, Nr4a3, Trib1
GO:0015980	energy derivation by oxidation of organic compounds	BP	246	6	0.00417746	Bdnf, Nr4a3, Atp5d, Coq10b, Nop53, Irs2
GO:0098531	ligand-activated transcription factor activity	MF	53	3	0.00421314	Nr4a1, Nr4a3, Nr4a2
GO:0004879	nuclear receptor activity	MF	53	3	0.00421314	Nr4a1, Nr4a3, Nr4a2
GO:0006111	regulation of gluconeogenesis	BP	53	3	0.00421314	Sik1, Ranbp2, Arpp19
GO:0006360	transcription by RNA polymerase I	BP	53	3	0.00421314	Ppp1r15a, Nop53, Rasl11a
GO:0071498	cellular response to fluid shear stress	BP	16	2	0.00421968	Klf4, Ptgs2
GO:0014067	negative regulation of phosphatidylinositol 3-kinase sign...	BP	16	2	0.00421968	Klf4, Nop53
GO:0016787	hydrolase activity	MF	2452	26	0.00423157	Adamts1, Gla, Casp3, Mest, Pcna, Ptp4a1, Dusp1, Rasd1, Rheb, Ddx3y, Hspa14, Tulp2, Atp5d, Dusp6, Rasl11a, Rasl11b, Otud1, Josd1, Plpp6, Rap2a, Ndel1, Inpp5f, Kif18a, Dusp5, Ovca2, Dusp4
GO:0055017	cardiac muscle tissue growth	BP	107	4	0.0042853	Cited2, Rgs2, Rgs4, Yap1
GO:0030425	dendrite	CC	706	11	0.00431801	Arc, Arf4, Bdnf, Plk3, Kcnj2, Rheb, Plk2, Homer1, C9orf72, Dnajb1, Inpp5f
GO:0006643	membrane lipid metabolic process	BP	173	5	0.0043235	Gla, Ccn1, Piga, St8sia4, B3galt2
GO:0051260	protein homooligomerization	BP	173	5	0.0043235	Arc, Kcnj2, Aldh1a3, Kctd12, Kcnf1
GO:1903522	regulation of blood circulation	BP	248	6	0.00434417	Kcnj2, Smad7, Ptgs2, Rgs2, Rgs4, Dusp5
GO:0033674	positive regulation of kinase activity	BP	510	9	0.0043447	Areg, Cdkn1a, Cdkn1b, Egr1, Ccn1, Gadd45b, Ranbp2, Gadd45g, Fbxw7
GO:0051272	positive regulation of cellular component movement	BP	607	10	0.00436811	Adamts1, Egr1, Ccn1, Jun, Nr4a3, Ptgs2, Ptp4a1, Plk2, Spry2, Irs2
GO:0043255	regulation of carbohydrate biosynthetic process	BP	108	4	0.00442921	Sik1, Ranbp2, Arpp19, Irs2
GO:0034976	response to endoplasmic reticulum stress	BP	249	6	0.00442933	Atf3, Bcl2l11, Casp3, Jun, Ppp1r15a, Pmaip1
GO:0016202	regulation of striated muscle tissue development	BP	174	5	0.0044298	Bdnf, Cited2, Rgs2, Rgs4, Yap1
GO:0052547	regulation of peptidase activity	BP	419	8	0.0044348	Bcl2l11, Nr4a1, Ccn1, Klf4, Ptgs2, Siah2, Pmaip1, Tnfrsf23
GO:0003707	steroid hormone receptor activity	MF	54	3	0.00444111	Nr4a1, Nr4a3, Nr4a2
GO:0097447	dendritic tree	CC	709	11	0.00445535	Arc, Arf4, Bdnf, Plk3, Kcnj2, Rheb, Plk2, Homer1, C9orf72, Dnajb1, Inpp5f
GO:0098657	import into cell	BP	250	6	0.00451573	Arc, Kcnj2, Rgs2, Rgs4, Eprs, Irs2
GO:0007626	locomotory behavior	BP	252	6	0.00469224	Egr1, Nr4a2, Aldh1a3, Inpp5f, Ghsr, Ciart
GO:0017015	regulation of transforming growth factor beta receptor si...	BP	110	4	0.00472672	Smad7, Cited2, Spry2, Rasl11b
GO:0007423	sensory organ development	BP	614	10	0.00472799	Bdnf, Bcl2l11, Cdkn1b, Foxg1, Jun, Klf4, Cited2, Nr4a3, Spry2, Aldh1a3
GO:0035051	cardiocyte differentiation	BP	177	5	0.00475987	Cited2, Sik1, Rgs2, Rgs4, Kdm6b
GO:1901861	regulation of muscle tissue development	BP	177	5	0.00475987	Bdnf, Cited2, Rgs2, Rgs4, Yap1
GO:0048368	lateral mesoderm development	BP	17	2	0.00476314	Cited2, Yap1
GO:0070262	peptidyl-serine dephosphorylation	BP	17	2	0.00476314	Ppp1r15a, Dusp1
GO:0014041	regulation of neuron maturation	BP	17	2	0.00476314	Mir132, Mir212
GO:0048634	regulation of muscle organ development	BP	178	5	0.00487367	Bdnf, Cited2, Rgs2, Rgs4, Yap1
GO:0042594	response to starvation	BP	178	5	0.00487367	Atf3, Cdkn1a, Jun, Sik1, Wdr45b
GO:1903362	regulation of cellular protein catabolic process	BP	254	6	0.00487378	Plk3, Smad7, Plk2, Fbxw7, Nop53, Trib1
GO:0008630	intrinsic apoptotic signaling pathway in response to DNA ...	BP	111	4	0.0048804	Bcl2l11, Cdkn1a, Tpt1, Pmaip1
GO:0030316	osteoclast differentiation	BP	111	4	0.0048804	Fos, Junb, Fbxw7, Tob2
GO:0043604	amide biosynthetic process	BP	718	11	0.00488838	Btg2, Ccn1, Ppp1r15a, Per1, Rgs2, Rpl21, Rpl9, St8sia4, B3galt2, Rpl22l1, Eprs
GO:0035924	cellular response to vascular endothelial growth factor s...	BP	56	3	0.00491916	Egr3, Nr4a1, Spry2
GO:0038127	ERBB signaling pathway	BP	112	4	0.00503739	Areg, Arf4, Fbxw7, Errfi1
GO:1903844	regulation of cellular response to transforming growth fa...	BP	112	4	0.00503739	Smad7, Cited2, Spry2, Rasl11b
GO:0032989	cellular component morphogenesis	BP	827	12	0.00512032	Arc, Bdnf, Egr2, Foxg1, Ifrd1, Nefl, Nr4a3, Nr4a2, Sgk1, C9orf72, Rap2a, Ndel1
GO:0007498	mesoderm development	BP	113	4	0.00519774	Cited2, Nr4a3, Yap1, Kdm6b
GO:0030534	adult behavior	BP	181	5	0.00522665	Nr4a3, Nr4a2, Homer1, Inpp5f, Ghsr
GO:0031503	protein-containing complex localization	BP	258	6	0.00525229	Arc, Smad7, Nptx2, Grasp, Ghsr, Ythdc1
GO:0032886	regulation of microtubule-based process	BP	258	6	0.00525229	Cdkn1b, Sgk1, Plk2, Rassf1, Chmp1b, Kif18a
GO:0010801	negative regulation of peptidyl-threonine phosphorylation	BP	18	2	0.00533707	Smad7, Spry2
GO:1904706	negative regulation of vascular associated smooth muscle ...	BP	18	2	0.00533707	Cdkn1a, Cdkn1b
GO:0042472	inner ear morphogenesis	BP	114	4	0.00536147	Foxg1, Nr4a3, Spry2, Aldh1a3
GO:0001776	leukocyte homeostasis	BP	114	4	0.00536147	Bcl2l11, Casp3, Pmaip1, Tnfrsf23
GO:0043401	steroid hormone mediated signaling pathway	BP	114	4	0.00536147	Bdnf, Per1, Sgk1, Yap1
GO:0034622	cellular protein-containing complex assembly	BP	940	13	0.00538834	Cdkn1b, Cenpa, Nefl, Sgk1, Snu13, Nap1l5, Atp5d, Nop53, Ndel1, Spty2d1, Ythdc1, H3c7, H3c6
GO:0042551	neuron maturation	BP	58	3	0.00542709	Nr4a2, Mir132, Mir212
GO:0010517	regulation of phospholipase activity	BP	58	3	0.00542709	Arf4, Ccn1, Rgs2
GO:0005996	monosaccharide metabolic process	BP	260	6	0.00544943	Atf3, Sik1, Ranbp2, Arpp19, Midn, Irs2
GO:0031398	positive regulation of protein ubiquitination	BP	115	4	0.00552861	Smad7, Fbxw7, Rassf1, Trib1
GO:2001235	positive regulation of apoptotic signaling pathway	BP	184	5	0.00559737	Atf3, Bcl2l11, Fbxw7, Pmaip1, Tnfrsf23
GO:0032388	positive regulation of intracellular transport	BP	184	5	0.00559737	Plk3, Emd, Ptgs2, Fbxw7, Pmaip1
GO:0099572	postsynaptic specialization	CC	436	8	0.00560375	Arc, Rheb, Homer1, Nptx2, Grasp, Dnajb1, Lrrtm2, Mir132
GO:0009247	glycolipid biosynthetic process	BP	59	3	0.00569241	Piga, St8sia4, B3galt2
GO:1903539	protein localization to postsynaptic membrane	BP	59	3	0.00569241	Nptx2, Grasp, Ghsr
GO:0001836	release of cytochrome c from mitochondria	BP	59	3	0.00569241	Bcl2l11, Jun, Pmaip1
GO:0001221	transcription cofactor binding	MF	59	3	0.00569241	Klf4, Nr4a3, Per1
GO:2000045	regulation of G1/S transition of mitotic cell cycle	BP	116	4	0.0056992	Adamts1, Cdkn1a, Plk3, Klf4
GO:0031644	regulation of nervous system process	BP	185	5	0.00572497	Egr2, Rgs4, Homer1, Nptx2, Ghsr
GO:0045926	negative regulation of growth	BP	263	6	0.00575522	Cdkn1a, Cdkn1b, Ifrd1, Cited2, Rgs2, Rgs4
GO:1901990	regulation of mitotic cell cycle phase transition	BP	263	6	0.00575522	Adamts1, Cdkn1a, Cdkn1b, Plk3, Klf4, Nop53
GO:0051222	positive regulation of protein transport	BP	348	7	0.00578217	Plk3, Emd, Ptgs2, Fbxw7, Pard6a, Pmaip1, Irs2
GO:0045860	positive regulation of protein kinase activity	BP	439	8	0.00583235	Areg, Cdkn1a, Cdkn1b, Egr1, Ccn1, Gadd45b, Gadd45g, Fbxw7
GO:0045766	positive regulation of angiogenesis	BP	186	5	0.0058546	Btg1, Klf4, Ptgs2, Plk2, Ghsr
GO:0036294	cellular response to decreased oxygen levels	BP	117	4	0.00587326	Plk3, Egr1, Cited2, Nop53
GO:0140354	lipid import into cell	BP	19	2	0.00594109	Eprs, Irs2
GO:0044539	long-chain fatty acid import into cell	BP	19	2	0.00594109	Eprs, Irs2
GO:0046321	positive regulation of fatty acid oxidation	BP	19	2	0.00594109	Nr4a3, Irs2
GO:0033145	positive regulation of intracellular steroid hormone rece...	BP	19	2	0.00594109	Bdnf, Yap1
GO:1904754	positive regulation of vascular associated smooth muscle ...	BP	19	2	0.00594109	Adamts1, Nr4a3
GO:0099571	postsynaptic cytoskeleton	CC	19	2	0.00594109	Nefl, Ina
GO:2000269	regulation of fibroblast apoptotic process	BP	19	2	0.00594109	Bcl2l11, Btg1
GO:0098962	regulation of postsynaptic neurotransmitter receptor acti...	BP	19	2	0.00594109	Homer1, Nptx2
GO:0035994	response to muscle stretch	BP	19	2	0.00594109	Fos, Jun
GO:0019789	SUMO transferase activity	MF	19	2	0.00594109	Egr2, Ranbp2
GO:0010769	regulation of cell morphogenesis involved in differentiat...	BP	350	7	0.00596048	Arc, Bdnf, Ifrd1, Nefl, Sgk1, Rap2a, Ndel1
GO:2000134	negative regulation of G1/S transition of mitotic cell cy...	BP	60	3	0.00596539	Cdkn1a, Plk3, Klf4
GO:0031329	regulation of cellular catabolic process	BP	738	11	0.00597049	Bcl2l11, Btg2, Plk3, Smad7, Plk2, Fbxw7, Nop53, C9orf72, Trib1, Tent5a, Irs2
GO:0031669	cellular response to nutrient levels	BP	188	5	0.00612004	Atf3, Cdkn1a, Jun, Sik1, Wdr45b
GO:0055114	oxidation-reduction process	BP	847	12	0.00615383	Auh, Bdnf, Fth1, Nr4a3, Ptgs2, Impdh2, Atp5d, Coq10b, Nop53, Kdm6b, Blvrb, Irs2
GO:0046513	ceramide biosynthetic process	BP	61	3	0.00624609	Ccn1, St8sia4, B3galt2
GO:0043588	skin development	BP	268	6	0.00629247	Casp3, Fosl2, Krt16, Ptgs2, Yap1, Errfi1
GO:0003007	heart morphogenesis	BP	269	6	0.00640415	Adamts1, Ccn1, Jun, Smad7, Cited2, Yap1
GO:0046467	membrane lipid biosynthetic process	BP	120	4	0.00641662	Ccn1, Piga, St8sia4, B3galt2
GO:0031975	envelope	CC	1072	14	0.00642942	Bdnf, Emd, Nr4a1, Ppp1r15a, Slc25a3, Ptgs2, Ranbp2, Tra2b, Grasp, Atp5d, Coq10b, Mlip, C9orf72, Ndel1
GO:0031967	organelle envelope	CC	1072	14	0.00642942	Bdnf, Emd, Nr4a1, Ppp1r15a, Slc25a3, Ptgs2, Ranbp2, Tra2b, Grasp, Atp5d, Coq10b, Mlip, C9orf72, Ndel1
GO:0071479	cellular response to ionizing radiation	BP	62	3	0.00653454	Cdkn1a, Egr1, Yap1
GO:0051148	negative regulation of muscle cell differentiation	BP	62	3	0.00653454	Bdnf, Rgs2, Rgs4
GO:0014911	positive regulation of smooth muscle cell migration	BP	62	3	0.00653454	Adamts1, Egr1, Nr4a3
GO:0007420	brain development	BP	644	10	0.00654272	Btg2, Egr2, Foxg1, Nr4a3, Nr4a2, Tra2b, Aldh1a3, Ndel1, Kdm6b, Irs2
GO:0005123	death receptor binding	MF	20	2	0.00657479	Bdnf, Casp3
GO:0035145	exon-exon junction complex	CC	20	2	0.00657479	Sap18, Sap18b
GO:0044819	mitotic G1/S transition checkpoint	BP	20	2	0.00657479	Cdkn1a, Plk3
GO:0045986	negative regulation of smooth muscle contraction	BP	20	2	0.00657479	Ptgs2, Rgs2
GO:0055106	ubiquitin-protein transferase regulator activity	MF	20	2	0.00657479	Fbxw7, Trib1
GO:0031109	microtubule polymerization or depolymerization	BP	122	4	0.00679679	Cdkn1b, Sgk1, Ndel1, Kif18a
GO:0016525	negative regulation of angiogenesis	BP	122	4	0.00679679	Adamts1, Klf4, Plk2, Spry2
GO:0019216	regulation of lipid metabolic process	BP	360	7	0.0069144	Egr1, Ccn1, Sik1, Nr4a3, Ptgs2, Ghsr, Irs2
GO:0006109	regulation of carbohydrate metabolic process	BP	194	5	0.00696705	Sik1, Ranbp2, Arpp19, Midn, Irs2
GO:0034599	cellular response to oxidative stress	BP	275	6	0.00710475	Fos, Jun, Nr4a3, Nr4a2, Fbxw7, Kdm6b
GO:0043197	dendritic spine	CC	195	5	0.00711578	Arc, Arf4, Kcnj2, Homer1, Dnajb1
GO:0043491	protein kinase B signaling	BP	195	5	0.00711578	Plk3, Klf4, Spry2, Nop53, Inpp5f
GO:1902807	negative regulation of cell cycle G1/S phase transition	BP	64	3	0.00713495	Cdkn1a, Plk3, Klf4
GO:0062237	protein localization to postsynapse	BP	64	3	0.00713495	Nptx2, Grasp, Ghsr
GO:0007622	rhythmic behavior	BP	64	3	0.00713495	Egr1, Egr2, Ciart
GO:0005200	structural constituent of cytoskeleton	MF	64	3	0.00713495	Krt16, Nefl, Ina
GO:1905039	carboxylic acid transmembrane transport	BP	124	4	0.00719159	Rgs2, Rgs4, Slc16a1, Irs2
GO:0043280	positive regulation of cysteine-type endopeptidase activi...	BP	124	4	0.00719159	Bcl2l11, Ccn1, Pmaip1, Tnfrsf23
GO:0051153	regulation of striated muscle cell differentiation	BP	124	4	0.00719159	Bdnf, Sik1, Rgs2, Rgs4
GO:0010212	response to ionizing radiation	BP	124	4	0.00719159	Cdkn1a, Egr1, Yap1, Pmaip1
GO:0044346	fibroblast apoptotic process	BP	21	2	0.00723781	Bcl2l11, Btg1
GO:0045475	locomotor rhythm	BP	21	2	0.00723781	Egr1, Ciart
GO:0051956	negative regulation of amino acid transport	BP	21	2	0.00723781	Rgs2, Rgs4
GO:2000726	negative regulation of cardiac muscle cell differentiatio...	BP	21	2	0.00723781	Rgs2, Rgs4
GO:0005640	nuclear outer membrane	CC	21	2	0.00723781	Emd, Ptgs2
GO:0090050	positive regulation of cell migration involved in sprouti...	BP	21	2	0.00723781	Ptgs2, Plk2
GO:0048569	post-embryonic animal organ development	BP	21	2	0.00723781	Bcl2l11, Klf4
GO:1904951	positive regulation of establishment of protein localizat...	BP	364	7	0.00732612	Plk3, Emd, Ptgs2, Fbxw7, Pard6a, Pmaip1, Irs2
GO:0030336	negative regulation of cell migration	BP	277	6	0.00735015	Klf4, Krt16, Cited2, Dusp1, Rap2a, Trib1
GO:0051053	negative regulation of DNA metabolic process	BP	125	4	0.00739454	Cdkn1a, Dusp1, Tinf2, Zfp869
GO:1903825	organic acid transmembrane transport	BP	125	4	0.00739454	Rgs2, Rgs4, Slc16a1, Irs2
GO:1902414	protein localization to cell junction	BP	125	4	0.00739454	Homer1, Nptx2, Grasp, Ghsr
GO:0005975	carbohydrate metabolic process	BP	557	9	0.00758582	Gla, Atf3, Sik1, Ranbp2, St8sia4, B3galt2, Arpp19, Midn, Irs2
GO:2000181	negative regulation of blood vessel morphogenesis	BP	126	4	0.00760123	Adamts1, Klf4, Plk2, Spry2
GO:1901566	organonitrogen compound biosynthetic process	BP	1445	17	0.00770481	Btg2, Ccn1, Klf4, Ppp1r15a, Nr4a2, Per1, Piga, Rgs2, Rpl21, Rpl9, St8sia4, Impdh2, B3galt2, Atp5d, Wdr45b, Rpl22l1, Eprs
GO:0007254	JNK cascade	BP	199	5	0.00773292	Gadd45b, Per1, Gadd45g, Rap2a, Trib1
GO:0030308	negative regulation of cell growth	BP	199	5	0.00773292	Cdkn1a, Cdkn1b, Ifrd1, Rgs2, Rgs4
GO:0000902	cell morphogenesis	BP	1096	14	0.00773867	Arc, Bdnf, Egr2, Foxg1, Ifrd1, Nefl, Nr4a3, Nr4a2, Sgk1, Yap1, C9orf72, Rap2a, Ndel1, Frmd6
GO:0033138	positive regulation of peptidyl-serine phosphorylation	BP	127	4	0.00781169	Bdnf, Ppp1r15a, Ptgs2, Spry2
GO:0002009	morphogenesis of an epithelium	BP	560	9	0.0078424	Areg, Ccn1, Klf4, Krt16, Cited2, Pcdh8, Yap1, Spry2, Aldh1a3
GO:0032869	cellular response to insulin stimulus	BP	200	5	0.00789283	Sgk1, Ndel1, Eprs, Ghsr, Irs2
GO:0044309	neuron spine	CC	200	5	0.00789283	Arc, Arf4, Kcnj2, Homer1, Dnajb1
GO:0006688	glycosphingolipid biosynthetic process	BP	22	2	0.00792977	St8sia4, B3galt2
GO:0060080	inhibitory postsynaptic potential	BP	22	2	0.00792977	Bdnf, Npas4
GO:0045943	positive regulation of transcription by RNA polymerase I	BP	22	2	0.00792977	Ppp1r15a, Rasl11a
GO:0072215	regulation of metanephros development	BP	22	2	0.00792977	Egr1, Yap1
GO:0010976	positive regulation of neuron projection development	BP	370	7	0.0079774	Adamts1, Bdnf, Nefl, Rgs2, Sgk1, Ndel1, Alkal2
GO:0046982	protein heterodimerization activity	MF	282	6	0.0079904	Atf3, Cenpa, Nr4a1, Nr4a2, Taf13, Npas4
GO:0010676	positive regulation of cellular carbohydrate metabolic pr...	BP	67	3	0.00809506	Ranbp2, Arpp19, Irs2
GO:0002763	positive regulation of myeloid leukocyte differentiation	BP	67	3	0.00809506	Fos, Jun, Trib1
GO:0045428	regulation of nitric oxide biosynthetic process	BP	67	3	0.00809506	Gla, Klf4, Ptgs2
GO:0006940	regulation of smooth muscle contraction	BP	67	3	0.00809506	Ptgs2, Rgs2, Ghsr
GO:0009894	regulation of catabolic process	BP	881	12	0.00828462	Bcl2l11, Btg2, Plk3, Smad7, Plk2, Fbxw7, Nop53, C9orf72, Tiparp, Trib1, Tent5a, Irs2
GO:0043603	cellular amide metabolic process	BP	993	13	0.00835796	Gla, Btg2, Casp3, Ccn1, Ppp1r15a, Per1, Rgs2, Rpl21, Rpl9, St8sia4, B3galt2, Rpl22l1, Eprs
GO:0099601	regulation of neurotransmitter receptor activity	BP	68	3	0.00843115	Arc, Homer1, Nptx2
GO:0007093	mitotic cell cycle checkpoint	BP	130	4	0.00846596	Cdkn1a, Plk3, Plk2, Nop53
GO:0042752	regulation of circadian rhythm	BP	130	4	0.00846596	Sik1, Per1, Siah2, Fbxw7
GO:0006665	sphingolipid metabolic process	BP	130	4	0.00846596	Gla, Ccn1, St8sia4, B3galt2
GO:0001816	cytokine production	BP	777	11	0.00861787	Egr1, Klf4, Smad7, Nr4a3, Per1, Ptgs2, Gadd45g, Nop53, Errfi1, Ghsr, Arid5a
GO:0045666	positive regulation of neuron differentiation	BP	470	8	0.00863193	Adamts1, Bdnf, Foxg1, Nefl, Rgs2, Sgk1, Ndel1, Alkal2
GO:0010498	proteasomal protein catabolic process	BP	470	8	0.00863193	Plk3, Smad7, Siah2, Plk2, Fbxw7, Nop53, Fbxo33, Trib1
GO:0071837	HMG box domain binding	MF	23	2	0.00865029	Egr2, Jun
GO:0030728	ovulation	BP	23	2	0.00865029	Adamts1, Ptgs2
GO:2000316	regulation of T-helper 17 type immune response	BP	23	2	0.00865029	Smad7, Arid5a
GO:0071453	cellular response to oxygen levels	BP	131	4	0.00869176	Plk3, Egr1, Cited2, Nop53
GO:0034728	nucleosome organization	BP	131	4	0.00869176	Nap1l5, Spty2d1, H3c7, H3c6
GO:2000377	regulation of reactive oxygen species metabolic process	BP	205	5	0.00872702	Gla, Arf4, Cdkn1a, Klf4, Ptgs2
GO:0048146	positive regulation of fibroblast proliferation	BP	69	3	0.00877533	Cdkn1a, Fosl2, Jun
GO:0042058	regulation of epidermal growth factor receptor signaling ...	BP	69	3	0.00877533	Areg, Fbxw7, Errfi1
GO:0003002	regionalization	BP	377	7	0.00879018	Arc, Btg2, Egr2, Foxg1, Cited2, Pcdh8, Tra2b
GO:0072593	reactive oxygen species metabolic process	BP	288	6	0.00881059	Gla, Arf4, Cdkn1a, Ccn1, Klf4, Ptgs2
GO:0031396	regulation of protein ubiquitination	BP	206	5	0.00890089	Smad7, Siah2, Fbxw7, Rassf1, Trib1
GO:0035639	purine ribonucleoside triphosphate binding	MF	1712	19	0.00897231	Arf4, Cdk11b, Plk3, Sik1, Rasd1, Rheb, Sgk1, Plk2, Ddx3y, Hspa14, Rasl11a, Rasl11b, Arl5b, Rap2a, Arl4d, Kti12, Eprs, Kif18a, Gmppb
GO:2000146	negative regulation of cell motility	BP	290	6	0.00909692	Klf4, Krt16, Cited2, Dusp1, Rap2a, Trib1
GO:0032922	circadian regulation of gene expression	BP	70	3	0.00912765	Egr1, Per1, Ciart
GO:0030512	negative regulation of transforming growth factor beta re...	BP	70	3	0.00912765	Smad7, Spry2, Rasl11b
GO:0050885	neuromuscular process controlling balance	BP	70	3	0.00912765	Nefl, Nr4a3, Aldh1a3
GO:0030888	regulation of B cell proliferation	BP	70	3	0.00912765	Casp3, Cdkn1a, Irs2
GO:0055117	regulation of cardiac muscle contraction	BP	70	3	0.00912765	Kcnj2, Smad7, Rgs2
GO:0044070	regulation of anion transport	BP	133	4	0.00915511	Rgs2, Rgs4, Eprs, Irs2
GO:0051656	establishment of organelle localization	BP	380	7	0.00915652	Cenpa, Nefl, Nr4a3, Spry2, Chmp1b, Ndel1, Kif18a
GO:0044262	cellular carbohydrate metabolic process	BP	291	6	0.00924255	Sik1, Ranbp2, B3galt2, Arpp19, Midn, Irs2
GO:0071824	protein-DNA complex subunit organization	BP	208	5	0.00925578	Cenpa, Nap1l5, Spty2d1, H3c7, H3c6
GO:0050806	positive regulation of synaptic transmission	BP	292	6	0.00938985	Arc, Ptgs2, Rgs4, Plk2, Lrrtm2, Mir132
GO:0032691	negative regulation of interleukin-1 beta production	BP	24	2	0.00939899	Errfi1, Ghsr
GO:2000737	negative regulation of stem cell differentiation	BP	24	2	0.00939899	Ccnk, Yap1
GO:0070412	R-SMAD binding	MF	24	2	0.00939899	Fos, Jun
GO:0048670	regulation of collateral sprouting	BP	24	2	0.00939899	Bdnf, Ifrd1
GO:0008090	retrograde axonal transport	BP	24	2	0.00939899	Nefl, Ndel1
GO:0000979	RNA polymerase II core promoter sequence-specific DNA bin...	MF	24	2	0.00939899	Egr1, Fos
GO:0001829	trophectodermal cell differentiation	BP	24	2	0.00939899	Junb, Cited2
GO:0051276	chromosome organization	BP	1124	14	0.00952569	Cenpa, Fbl, Pcna, Per1, Tinf2, Fbxw7, Nap1l5, Chmp1b, Spty2d1, Arid5a, Kdm6b, Kif18a, H3c7, H3c6
GO:0000922	spindle pole	CC	135	4	0.00963427	Plk3, Emd, Plk2, Tpt1
GO:1901987	regulation of cell cycle phase transition	BP	295	6	0.00984179	Adamts1, Cdkn1a, Cdkn1b, Plk3, Klf4, Nop53
GO:0006811	ion transport	BP	1605	18	0.00984288	Arc, Bdnf, Cdkn1b, Fth1, Kcnj2, Sik1, Per1, Slc25a3, Ptgs2, Rgs2, Rgs4, Sgk1, Slc16a1, Homer1, Atp5d, Eprs, Kcnf1, Irs2
GO:1903845	negative regulation of cellular response to transforming ...	BP	72	3	0.00985684	Smad7, Spry2, Rasl11b
GO:0042471	ear morphogenesis	BP	136	4	0.00987985	Foxg1, Nr4a3, Spry2, Aldh1a3
GO:0099513	polymeric cytoskeletal fiber	CC	686	10	0.00994396	Bcl2l11, Emd, Krt16, Nefl, Tpt1, Spry2, Rassf1, Ndel1, Ina, Kif18a
GO:0048675	axon extension	BP	137	4	0.0101295	Bdnf, Ifrd1, C9orf72, Ndel1
GO:0007095	mitotic G2 DNA damage checkpoint	BP	25	2	0.0101755	Cdkn1a, Nop53
GO:1905208	negative regulation of cardiocyte differentiation	BP	25	2	0.0101755	Rgs2, Rgs4
GO:0060004	reflex	BP	25	2	0.0101755	Nr4a3, Aldh1a3
GO:1902683	regulation of receptor localization to synapse	BP	25	2	0.0101755	Grasp, Ghsr
GO:1904752	regulation of vascular associated smooth muscle cell migr...	BP	25	2	0.0101755	Adamts1, Nr4a3
GO:0005732	small nucleolar ribonucleoprotein complex	CC	25	2	0.0101755	Fbl, Snu13
GO:0005160	transforming growth factor beta receptor binding	MF	25	2	0.0101755	Smad7, Rasl11b
GO:1904738	vascular associated smooth muscle cell migration	BP	25	2	0.0101755	Adamts1, Nr4a3
GO:0007417	central nervous system development	BP	906	12	0.0101912	Btg2, Egr2, Foxg1, Cited2, Nr4a3, Nr4a2, Rheb, Tra2b, Aldh1a3, Ndel1, Kdm6b, Irs2
GO:0032101	regulation of response to external stimulus	BP	906	12	0.0101912	Klf4, Per1, Ptgs2, Dusp1, Scg2, Nop53, Spaar, C2cd4b, Ndel1, Inpp5f, Ghsr, Trib1
GO:0021766	hippocampus development	BP	73	3	0.0102338	Btg2, Nr4a3, Kdm6b
GO:0097120	receptor localization to synapse	BP	73	3	0.0102338	Nptx2, Grasp, Ghsr
GO:0006936	muscle contraction	BP	298	6	0.010309	Kcnj2, Smad7, Ptgs2, Rgs2, Homer1, Ghsr
GO:0007548	sex differentiation	BP	298	6	0.010309	Adamts1, Bcl2l11, Cited2, Tiparp, Kif18a, Vgf
GO:0051098	regulation of binding	BP	389	7	0.0103228	Bdnf, Cdkn1a, Jun, Klf4, Plk2, Fbxw7, C9orf72
GO:0070647	protein modification by small protein conjugation or remo...	BP	799	11	0.0104692	Egr1, Egr2, Smad7, Siah2, Ubc, Fbxw7, Rassf1, Nop53, Otud1, Josd1, Trib1
GO:0015672	monovalent inorganic cation transport	BP	487	8	0.0105412	Cdkn1b, Kcnj2, Sik1, Per1, Rgs4, Sgk1, Atp5d, Kcnf1
GO:0048639	positive regulation of developmental growth	BP	215	5	0.0105746	Bdnf, Smad7, Yap1, Ndel1, Ghsr
GO:1901184	regulation of ERBB signaling pathway	BP	74	3	0.010619	Areg, Fbxw7, Errfi1
GO:0050877	nervous system process	BP	2248	23	0.0106363	Arc, Arf4, Bdnf, Btg2, Casp3, Cdkn1b, Egr1, Egr2, Jun, Nefl, Nr4a3, Ptgs2, Rgs4, Sgk1, Plk2, Spry2, Homer1, Nptx2, Aldh1a3, Fam107b, Ghsr, Npas4, Olfr1385
GO:0055007	cardiac muscle cell differentiation	BP	139	4	0.0106408	Sik1, Rgs2, Rgs4, Kdm6b
GO:1901343	negative regulation of vasculature development	BP	139	4	0.0106408	Adamts1, Klf4, Plk2, Spry2
GO:0097367	carbohydrate derivative binding	MF	2123	22	0.010816	Adamts1, Gla, Arf4, Cdk11b, Plk3, Ccn1, Sik1, Rasd1, Rheb, Sgk1, Plk2, Ddx3y, Hspa14, Rasl11a, Rasl11b, Arl5b, Rap2a, Arl4d, Kti12, Eprs, Kif18a, Gmppb
GO:0007263	nitric oxide mediated signal transduction	BP	26	2	0.0109795	Mt1, Rasd1
GO:0099524	postsynaptic cytosol	CC	26	2	0.0109795	Homer1, Dnajb1
GO:0044183	protein folding chaperone	MF	26	2	0.0109795	Hspa14, Dnajb1
GO:1903747	regulation of establishment of protein localization to mi...	BP	26	2	0.0109795	Fbxw7, Pmaip1
GO:0006809	nitric oxide biosynthetic process	BP	75	3	0.0110126	Gla, Klf4, Ptgs2
GO:0045927	positive regulation of growth	BP	303	6	0.0111225	Bdnf, Smad7, Sgk1, Yap1, Ndel1, Ghsr
GO:0042176	regulation of protein catabolic process	BP	395	7	0.0111582	Plk3, Smad7, Plk2, Fbxw7, Nop53, Tiparp, Trib1
GO:0003206	cardiac chamber morphogenesis	BP	141	4	0.0111686	Adamts1, Ccn1, Smad7, Cited2
GO:1901991	negative regulation of mitotic cell cycle phase transitio...	BP	141	4	0.0111686	Cdkn1a, Plk3, Klf4, Nop53
GO:2001056	positive regulation of cysteine-type endopeptidase activi...	BP	141	4	0.0111686	Bcl2l11, Ccn1, Pmaip1, Tnfrsf23
GO:0001817	regulation of cytokine production	BP	699	10	0.0112313	Egr1, Klf4, Smad7, Nr4a3, Per1, Ptgs2, Nop53, Errfi1, Ghsr, Arid5a
GO:0044283	small molecule biosynthetic process	BP	594	9	0.0112355	Atf3, Egr1, Sik1, Ptgs2, Ranbp2, Impdh2, Aldh1a3, Arpp19, Coq10b
GO:0010948	negative regulation of cell cycle process	BP	219	5	0.0113833	Cdkn1a, Plk3, Klf4, Rassf1, Nop53
GO:0000079	regulation of cyclin-dependent protein serine/threonine k...	BP	76	3	0.0114144	Casp3, Cdkn1a, Cdkn1b
GO:0045670	regulation of osteoclast differentiation	BP	76	3	0.0114144	Fos, Fbxw7, Tob2
GO:0061097	regulation of protein tyrosine kinase activity	BP	76	3	0.0114144	Areg, Fbxw7, Errfi1
GO:0006091	generation of precursor metabolites and energy	BP	397	7	0.0114473	Bdnf, Nr4a3, Atp5d, Coq10b, Nop53, Vgf, Irs2
GO:0051169	nuclear transport	BP	305	6	0.0114602	Cdkn1a, Egr2, Emd, Ptgs2, Ranbp2, Ythdc1
GO:0006913	nucleocytoplasmic transport	BP	305	6	0.0114602	Cdkn1a, Egr2, Emd, Ptgs2, Ranbp2, Ythdc1
GO:0090596	sensory organ morphogenesis	BP	305	6	0.0114602	Bdnf, Foxg1, Cited2, Nr4a3, Spry2, Aldh1a3
GO:0098656	anion transmembrane transport	BP	220	5	0.0115918	Slc25a3, Rgs2, Rgs4, Slc16a1, Irs2
GO:0045637	regulation of myeloid cell differentiation	BP	220	5	0.0115918	Fos, Jun, Fbxw7, Tob2, Trib1
GO:0042692	muscle cell differentiation	BP	398	7	0.0115939	Bdnf, Ifrd1, Sik1, Rgs2, Rgs4, Homer1, Kdm6b
GO:0014069	postsynaptic density	CC	398	7	0.0115939	Arc, Rheb, Homer1, Grasp, Dnajb1, Lrrtm2, Mir132
GO:0003006	developmental process involved in reproduction	BP	1037	13	0.0116965	Adamts1, Areg, Bcl2l11, Cdkn1b, Ccn1, Junb, Cited2, Ptgs2, Rgs2, Tiparp, Ghsr, Kif18a, Vgf
GO:0030010	establishment of cell polarity	BP	143	4	0.011713	Cenpa, Spry2, Pard6a, Ndel1
GO:0010508	positive regulation of autophagy	BP	143	4	0.011713	Bcl2l11, Plk3, Plk2, C9orf72
GO:0022414	reproductive process	BP	1513	17	0.0117915	Adamts1, Areg, Bcl2l11, Cdkn1b, Egr1, Gpr3, Ccn1, Junb, Cited2, Ptgs2, Rgs2, Snu13, Ddx3y, Tiparp, Ghsr, Kif18a, Vgf
GO:0060716	labyrinthine layer blood vessel development	BP	27	2	0.0118106	Ccn1, Junb
GO:0051443	positive regulation of ubiquitin-protein transferase acti...	BP	27	2	0.0118106	Fbxw7, Trib1
GO:0048745	smooth muscle tissue development	BP	27	2	0.0118106	Zfand5, Tiparp
GO:0034644	cellular response to UV	BP	77	3	0.0118247	Cdkn1a, Pcna, Fbxw7
GO:0000786	nucleosome	CC	77	3	0.0118247	Cenpa, H3c7, H3c6
GO:0010822	positive regulation of mitochondrion organization	BP	77	3	0.0118247	Bcl2l11, Fbxw7, Pmaip1
GO:0033143	regulation of intracellular steroid hormone receptor sign...	BP	77	3	0.0118247	Bdnf, Per1, Yap1
GO:0000003	reproduction	BP	1514	17	0.0118623	Adamts1, Areg, Bcl2l11, Cdkn1b, Egr1, Gpr3, Ccn1, Junb, Cited2, Ptgs2, Rgs2, Snu13, Ddx3y, Tiparp, Ghsr, Kif18a, Vgf
GO:0006935	chemotaxis	BP	600	9	0.0119337	Bdnf, Egr2, Egr3, Foxg1, Nr4a1, Ccn1, Nr4a3, Dusp1, Scg2
GO:0106106	cold-induced thermogenesis	BP	144	4	0.0119915	Gpr3, Rheb, Gadd45g, Kdm6b
GO:0120161	regulation of cold-induced thermogenesis	BP	144	4	0.0119915	Gpr3, Rheb, Gadd45g, Kdm6b
GO:0001654	eye development	BP	401	7	0.0120417	Bdnf, Cdkn1b, Jun, Klf4, Cited2, Spry2, Aldh1a3
GO:0034248	regulation of cellular amide metabolic process	BP	401	7	0.0120417	Btg2, Casp3, Ccn1, Ppp1r15a, Per1, Rgs2, Eprs
GO:0007163	establishment or maintenance of cell polarity	BP	223	5	0.0122331	Arf4, Cenpa, Spry2, Pard6a, Ndel1
GO:0050000	chromosome localization	BP	78	3	0.0122433	Chmp1b, Ndel1, Kif18a
GO:0051303	establishment of chromosome localization	BP	78	3	0.0122433	Chmp1b, Ndel1, Kif18a
GO:0046785	microtubule polymerization	BP	78	3	0.0122433	Cdkn1b, Sgk1, Ndel1
GO:0006970	response to osmotic stress	BP	78	3	0.0122433	Casp3, Plk3, Ptgs2
GO:0032279	asymmetric synapse	CC	403	7	0.0123471	Arc, Rheb, Homer1, Grasp, Dnajb1, Lrrtm2, Mir132
GO:0051346	negative regulation of hydrolase activity	BP	404	7	0.0125019	Nr4a1, Klf4, Ppp1r15a, Ptgs2, Rgs2, Siah2, Spry2
GO:0042330	taxis	BP	605	9	0.0125398	Bdnf, Egr2, Egr3, Foxg1, Nr4a1, Ccn1, Nr4a3, Dusp1, Scg2
GO:0031497	chromatin assembly	BP	146	4	0.0125611	Nap1l5, Spty2d1, H3c7, H3c6
GO:0150063	visual system development	BP	405	7	0.0126581	Bdnf, Cdkn1b, Jun, Klf4, Cited2, Spry2, Aldh1a3
GO:0048596	embryonic camera-type eye morphogenesis	BP	28	2	0.0126684	Cited2, Aldh1a3
GO:2000178	negative regulation of neural precursor cell proliferatio...	BP	28	2	0.0126684	Bdnf, Btg2
GO:1900745	positive regulation of p38MAPK cascade	BP	28	2	0.0126684	Gadd45b, Gadd45g
GO:0046209	nitric oxide metabolic process	BP	79	3	0.0126704	Gla, Klf4, Ptgs2
GO:0060191	regulation of lipase activity	BP	79	3	0.0126704	Arf4, Ccn1, Rgs2
GO:1901265	nucleoside phosphate binding	MF	2029	21	0.0128457	Arf4, Cdk11b, Plk3, Sik1, Rasd1, Rheb, Sgk1, Plk2, Impdh2, Ddx3y, Hspa14, Aldh1a3, Rasl11a, Rasl11b, Arl5b, Rap2a, Arl4d, Kti12, Eprs, Kif18a, Gmppb
GO:0000166	nucleotide binding	MF	2029	21	0.0128457	Arf4, Cdk11b, Plk3, Sik1, Rasd1, Rheb, Sgk1, Plk2, Impdh2, Ddx3y, Hspa14, Aldh1a3, Rasl11a, Rasl11b, Arl5b, Rap2a, Arl4d, Kti12, Eprs, Kif18a, Gmppb
GO:0060411	cardiac septum morphogenesis	BP	80	3	0.0131059	Ccn1, Smad7, Cited2
GO:1904029	regulation of cyclin-dependent protein kinase activity	BP	80	3	0.0131059	Casp3, Cdkn1a, Cdkn1b
GO:0032651	regulation of interleukin-1 beta production	BP	80	3	0.0131059	Egr1, Errfi1, Ghsr
GO:0003281	ventricular septum development	BP	80	3	0.0131059	Ccn1, Smad7, Cited2
GO:0030073	insulin secretion	BP	227	5	0.013125	Slc16a1, Midn, Ghsr, Vgf, Irs2
GO:0048880	sensory system development	BP	409	7	0.013297	Bdnf, Cdkn1b, Jun, Klf4, Cited2, Spry2, Aldh1a3
GO:0034614	cellular response to reactive oxygen species	BP	149	4	0.0134475	Fos, Jun, Nr4a3, Kdm6b
GO:0051146	striated muscle cell differentiation	BP	316	6	0.0134484	Bdnf, Sik1, Rgs2, Rgs4, Homer1, Kdm6b
GO:0032555	purine ribonucleotide binding	MF	1785	19	0.0135129	Arf4, Cdk11b, Plk3, Sik1, Rasd1, Rheb, Sgk1, Plk2, Ddx3y, Hspa14, Rasl11a, Rasl11b, Arl5b, Rap2a, Arl4d, Kti12, Eprs, Kif18a, Gmppb
GO:0021675	nerve development	BP	81	3	0.0135499	Bdnf, Egr2, Cited2
GO:0071353	cellular response to interleukin-4	BP	29	2	0.0135526	Nfil3, Impdh2
GO:0097472	cyclin-dependent protein kinase activity	MF	29	2	0.0135526	Ccnk, Cdk11b
GO:0004693	cyclin-dependent protein serine/threonine kinase activity	MF	29	2	0.0135526	Ccnk, Cdk11b
GO:0061050	regulation of cell growth involved in cardiac muscle cell...	BP	29	2	0.0135526	Rgs2, Rgs4
GO:0019941	modification-dependent protein catabolic process	BP	613	9	0.0135571	Plk3, Smad7, Siah2, Plk2, Ubc, Fbxw7, Nop53, Fbxo33, Trib1
GO:1903829	positive regulation of cellular protein localization	BP	317	6	0.0136404	Plk3, Emd, Ptgs2, Fbxw7, Pard6a, Pmaip1
GO:0001824	blastocyst development	BP	150	4	0.0137516	Cdk11b, Junb, Cited2, Ndel1
GO:0003015	heart process	BP	230	5	0.0138221	Kcnj2, Smad7, Rgs2, Rgs4, Yap1
GO:0034097	response to cytokine	BP	945	12	0.0138266	Egr1, Klf4, Smad7, Nfil3, Piga, Ptgs2, Dusp1, Yap1, Impdh2, Spry2, Eprs, Ina
GO:0030155	regulation of cell adhesion	BP	723	10	0.0139358	Casp3, Egr3, Ccn1, Klf4, Smad7, Cited2, Nr4a3, Pcdh8, Dusp1, C2cd4b
GO:0051262	protein tetramerization	BP	82	3	0.0140024	Kcnj2, Homer1, Aldh1a3
GO:0051384	response to glucocorticoid	BP	82	3	0.0140024	Areg, Sgk1, Npas4
GO:0001501	skeletal system development	BP	514	8	0.0141941	Ccn1, Smad7, Cited2, Zfand5, Fbxw7, Tiparp, Arid5a, Csrnp1
GO:0000280	nuclear division	BP	415	7	0.0142982	Bcl2l11, Cdk11b, Cdkn1b, Gpr3, Chmp1b, Ndel1, Kif18a
GO:0017076	purine nucleotide binding	MF	1797	19	0.0144088	Arf4, Cdk11b, Plk3, Sik1, Rasd1, Rheb, Sgk1, Plk2, Ddx3y, Hspa14, Rasl11a, Rasl11b, Arl5b, Rap2a, Arl4d, Kti12, Eprs, Kif18a, Gmppb
GO:0051085	chaperone cofactor-dependent protein refolding	BP	30	2	0.0144628	Hspa14, Dnajb1
GO:0021602	cranial nerve morphogenesis	BP	30	2	0.0144628	Egr2, Cited2
GO:0035767	endothelial cell chemotaxis	BP	30	2	0.0144628	Egr3, Nr4a1
GO:0043153	entrainment of circadian clock by photoperiod	BP	30	2	0.0144628	Sik1, Per1
GO:0045671	negative regulation of osteoclast differentiation	BP	30	2	0.0144628	Fbxw7, Tob2
GO:0061036	positive regulation of cartilage development	BP	30	2	0.0144628	Ccn1, Smad7
GO:0002724	regulation of T cell cytokine production	BP	30	2	0.0144628	Smad7, Arid5a
GO:0030148	sphingolipid biosynthetic process	BP	83	3	0.0144634	Ccn1, St8sia4, B3galt2
GO:0046983	protein dimerization activity	MF	952	12	0.0145726	Gla, Atf3, Cenpa, Nr4a1, Nr4a3, Nr4a2, Ptgs2, Aldh1a3, Taf13, Inpp5f, Eprs, Npas4
GO:0048562	embryonic organ morphogenesis	BP	322	6	0.014629	Foxg1, Cited2, Nr4a3, Yap1, Spry2, Aldh1a3
GO:0032553	ribonucleotide binding	MF	1802	19	0.0147957	Arf4, Cdk11b, Plk3, Sik1, Rasd1, Rheb, Sgk1, Plk2, Ddx3y, Hspa14, Rasl11a, Rasl11b, Arl5b, Rap2a, Arl4d, Kti12, Eprs, Kif18a, Gmppb
GO:1903706	regulation of hemopoiesis	BP	418	7	0.0148186	Egr3, Fos, Jun, Smad7, Fbxw7, Tob2, Trib1
GO:0043632	modification-dependent macromolecule catabolic process	BP	623	9	0.0149134	Plk3, Smad7, Siah2, Plk2, Ubc, Fbxw7, Nop53, Fbxo33, Trib1
GO:0051817	modulation of process of other organism involved in symbi...	BP	84	3	0.014933	Bcl2l11, Ccnk, Jun
GO:2001057	reactive nitrogen species metabolic process	BP	84	3	0.014933	Gla, Klf4, Ptgs2
GO:0006942	regulation of striated muscle contraction	BP	84	3	0.014933	Kcnj2, Smad7, Rgs2
GO:1905114	cell surface receptor signaling pathway involved in cell-...	BP	519	8	0.0149607	Bdnf, Egr1, Emd, Klf4, Rgs4, Siah2, Yap1, Npas4
GO:0010632	regulation of epithelial cell migration	BP	235	5	0.0150386	Jun, Klf4, Ptgs2, Plk2, Fbxw7
GO:0001783	B cell apoptotic process	BP	31	2	0.0153987	Bcl2l11, Irs2
GO:0045932	negative regulation of muscle contraction	BP	31	2	0.0153987	Ptgs2, Rgs2
GO:0033137	negative regulation of peptidyl-serine phosphorylation	BP	31	2	0.0153987	Smad7, Inpp5f
GO:0048011	neurotrophin TRK receptor signaling pathway	BP	31	2	0.0153987	Casp3, Spry2
GO:0033687	osteoblast proliferation	BP	31	2	0.0153987	Ccn1, Junb
GO:0009648	photoperiodism	BP	31	2	0.0153987	Sik1, Per1
GO:0045742	positive regulation of epidermal growth factor receptor s...	BP	31	2	0.0153987	Areg, Fbxw7
GO:0070670	response to interleukin-4	BP	31	2	0.0153987	Nfil3, Impdh2
GO:0044815	DNA packaging complex	CC	85	3	0.0154111	Cenpa, H3c7, H3c6
GO:0002718	regulation of cytokine production involved in immune resp...	BP	85	3	0.0154111	Smad7, Nr4a3, Arid5a
GO:0072594	establishment of protein localization to organelle	BP	422	7	0.0155333	Arc, Cdkn1a, Ptgs2, Ranbp2, Srp14, Fbxw7, Pmaip1
GO:1903707	negative regulation of hemopoiesis	BP	156	4	0.0156678	Smad7, Fbxw7, Tob2, Trib1
GO:1990830	cellular response to leukemia inhibitory factor	BP	238	5	0.0158019	Klf4, Smad7, Piga, Spry2, Ina
GO:0048609	multicellular organismal reproductive process	BP	849	11	0.0158064	Adamts1, Bcl2l11, Egr1, Junb, Cited2, Ptgs2, Rgs2, Ddx3y, Ghsr, Kif18a, Vgf
GO:0002088	lens development in camera-type eye	BP	86	3	0.0158977	Cdkn1b, Cited2, Spry2
GO:0031960	response to corticosteroid	BP	86	3	0.0158977	Areg, Sgk1, Npas4
GO:1901988	negative regulation of cell cycle phase transition	BP	157	4	0.0160027	Cdkn1a, Plk3, Klf4, Nop53
GO:0071345	cellular response to cytokine stimulus	BP	851	11	0.0160559	Egr1, Klf4, Smad7, Nfil3, Piga, Dusp1, Yap1, Impdh2, Spry2, Eprs, Ina
GO:1990823	response to leukemia inhibitory factor	BP	239	5	0.0160619	Klf4, Smad7, Piga, Spry2, Ina
GO:0045211	postsynaptic membrane	CC	329	6	0.0160954	Arc, Pcdh8, Nptx2, Grasp, Lrrtm2, Kctd12
GO:0003013	circulatory system process	BP	527	8	0.0162494	Kcnj2, Smad7, Ptgs2, Rgs2, Rgs4, Yap1, C2cd4b, Dusp5
GO:0060561	apoptotic process involved in morphogenesis	BP	32	2	0.01636	Bcl2l11, Ccn1
GO:0048668	collateral sprouting	BP	32	2	0.01636	Bdnf, Ifrd1
GO:0009649	entrainment of circadian clock	BP	32	2	0.01636	Sik1, Per1
GO:0032692	negative regulation of interleukin-1 production	BP	32	2	0.01636	Errfi1, Ghsr
GO:1902110	positive regulation of mitochondrial membrane permeabilit...	BP	32	2	0.01636	Bcl2l11, Pmaip1
GO:0070536	protein K63-linked deubiquitination	BP	32	2	0.01636	Nop53, Otud1
GO:1902473	regulation of protein localization to synapse	BP	32	2	0.01636	Grasp, Ghsr
GO:0090075	relaxation of muscle	BP	32	2	0.01636	Kcnj2, Rgs2
GO:0022407	regulation of cell-cell adhesion	BP	427	7	0.0164608	Casp3, Egr3, Klf4, Smad7, Cited2, Nr4a3, Pcdh8
GO:0010959	regulation of metal ion transport	BP	427	7	0.0164608	Kcnj2, Sik1, Per1, Ptgs2, Rgs4, Sgk1, Homer1
GO:0061695	transferase complex, transferring phosphorus-containing g...	CC	241	5	0.0165906	Ccnk, Cdkn1a, Pcna, C9orf72, Taf13
GO:1990845	adaptive thermogenesis	BP	159	4	0.0166858	Gpr3, Rheb, Gadd45g, Kdm6b
GO:0007565	female pregnancy	BP	159	4	0.0166858	Junb, Cited2, Ptgs2, Ghsr
GO:0010950	positive regulation of endopeptidase activity	BP	159	4	0.0166858	Bcl2l11, Ccn1, Pmaip1, Tnfrsf23
GO:0034620	cellular response to unfolded protein	BP	88	3	0.0168968	Atf3, Ppp1r15a, Hspa14
GO:0060079	excitatory postsynaptic potential	BP	88	3	0.0168968	Bdnf, Rgs4, Npas4
GO:0045913	positive regulation of carbohydrate metabolic process	BP	88	3	0.0168968	Ranbp2, Arpp19, Irs2
GO:0072091	regulation of stem cell proliferation	BP	88	3	0.0168968	Bdnf, Foxg1, Yap1
GO:0046942	carboxylic acid transport	BP	333	6	0.0169775	Bdnf, Rgs2, Rgs4, Slc16a1, Eprs, Irs2
GO:0000910	cytokinesis	BP	160	4	0.0170341	Cenpa, Plk3, Plk2, Chmp1b
GO:0005874	microtubule	CC	430	7	0.0170357	Bcl2l11, Emd, Tpt1, Spry2, Rassf1, Ndel1, Kif18a
GO:0098984	neuron to neuron synapse	CC	430	7	0.0170357	Arc, Rheb, Homer1, Grasp, Dnajb1, Lrrtm2, Mir132
GO:0000186	activation of MAPKK activity	BP	33	2	0.0173462	Gadd45b, Gadd45g
GO:0044818	mitotic G2/M transition checkpoint	BP	33	2	0.0173462	Cdkn1a, Nop53
GO:0002675	positive regulation of acute inflammatory response	BP	33	2	0.0173462	Ptgs2, C2cd4b
GO:1901186	positive regulation of ERBB signaling pathway	BP	33	2	0.0173462	Areg, Fbxw7
GO:1903429	regulation of cell maturation	BP	33	2	0.0173462	Mir132, Mir212
GO:0099080	supramolecular complex	CC	1215	14	0.0176618	Bcl2l11, Cenpa, Emd, Krt16, Nefl, Tpt1, Spry2, Homer1, Ddx3y, Rassf1, C9orf72, Ndel1, Ina, Kif18a
GO:0031965	nuclear membrane	CC	245	5	0.0176823	Emd, Nr4a1, Ptgs2, Tra2b, C9orf72
GO:0045111	intermediate filament cytoskeleton	CC	162	4	0.0177442	Krt16, Nefl, Ndel1, Ina
GO:0015849	organic acid transport	BP	337	6	0.0178923	Bdnf, Rgs2, Rgs4, Slc16a1, Eprs, Irs2
GO:0008013	beta-catenin binding	MF	90	3	0.0179302	Klf4, Smad7, Kdm6b
GO:0070227	lymphocyte apoptotic process	BP	90	3	0.0179302	Bcl2l11, Tnfrsf23, Irs2
GO:0090092	regulation of transmembrane receptor protein serine/threo...	BP	246	5	0.0179625	Ccn1, Smad7, Cited2, Spry2, Rasl11b
GO:0010817	regulation of hormone levels	BP	537	8	0.0179709	Egr1, Slc16a1, Aldh1a3, Midn, Tiparp, Ghsr, Vgf, Irs2
GO:0032504	multicellular organism reproduction	BP	866	11	0.018022	Adamts1, Bcl2l11, Egr1, Junb, Cited2, Ptgs2, Rgs2, Ddx3y, Ghsr, Kif18a, Vgf
GO:0006941	striated muscle contraction	BP	163	4	0.0181062	Kcnj2, Smad7, Rgs2, Homer1
GO:0030258	lipid modification	BP	247	5	0.0182456	Auh, Nr4a3, Plpp6, Inpp5f, Irs2
GO:0060541	respiratory system development	BP	247	5	0.0182456	Yap1, Spry2, Fbxw7, Aldh1a3, Errfi1
GO:0048048	embryonic eye morphogenesis	BP	34	2	0.0183572	Cited2, Aldh1a3
GO:1902686	mitochondrial outer membrane permeabilization involved in...	BP	34	2	0.0183572	Bcl2l11, Pmaip1
GO:0099645	neurotransmitter receptor localization to postsynaptic sp...	BP	34	2	0.0183572	Nptx2, Ghsr
GO:0099633	protein localization to postsynaptic specialization membr...	BP	34	2	0.0183572	Nptx2, Ghsr
GO:0072538	T-helper 17 type immune response	BP	34	2	0.0183572	Smad7, Arid5a
GO:0007264	small GTPase mediated signal transduction	BP	437	7	0.0184323	Jun, Rheb, Plk2, Spry2, Rassf1, Arpp19, Rap2a
GO:0044344	cellular response to fibroblast growth factor stimulus	BP	91	3	0.0184599	Egr3, Nr4a1, Spry2
GO:0032611	interleukin-1 beta production	BP	91	3	0.0184599	Egr1, Errfi1, Ghsr
GO:1903524	positive regulation of blood circulation	BP	91	3	0.0184599	Ptgs2, Rgs2, Rgs4
GO:0043433	negative regulation of DNA-binding transcription factor a...	BP	164	4	0.0184726	Klf4, Smad7, Sik1, Trib1
GO:0098739	import across plasma membrane	BP	165	4	0.0188437	Kcnj2, Rgs2, Rgs4, Irs2
GO:0051147	regulation of muscle cell differentiation	BP	165	4	0.0188437	Bdnf, Sik1, Rgs2, Rgs4
GO:0051896	regulation of protein kinase B signaling	BP	165	4	0.0188437	Klf4, Spry2, Nop53, Inpp5f
GO:0010594	regulation of endothelial cell migration	BP	166	4	0.0192193	Klf4, Ptgs2, Plk2, Fbxw7
GO:0051084	'de novo' posttranslational protein folding	BP	35	2	0.0193924	Hspa14, Dnajb1
GO:0006458	'de novo' protein folding	BP	35	2	0.0193924	Hspa14, Dnajb1
GO:0060441	epithelial tube branching involved in lung morphogenesis	BP	35	2	0.0193924	Yap1, Spry2
GO:0060292	long-term synaptic depression	BP	35	2	0.0193924	Arc, Plk2
GO:0035308	negative regulation of protein dephosphorylation	BP	35	2	0.0193924	Ppp1r15a, Arpp19
GO:0045987	positive regulation of smooth muscle contraction	BP	35	2	0.0193924	Ptgs2, Ghsr
GO:1903203	regulation of oxidative stress-induced neuron death	BP	35	2	0.0193924	Nr4a3, Fbxw7
GO:0032094	response to food	BP	35	2	0.0193924	Slc16a1, Ghsr
GO:0002028	regulation of sodium ion transport	BP	93	3	0.0195451	Sik1, Per1, Sgk1
GO:0051100	negative regulation of binding	BP	167	4	0.0195996	Cdkn1a, Jun, Fbxw7, C9orf72
GO:2001242	regulation of intrinsic apoptotic signaling pathway	BP	167	4	0.0195996	Bcl2l11, Ptgs2, Tpt1, Fbxw7
GO:0006333	chromatin assembly or disassembly	BP	168	4	0.0199845	Nap1l5, Spty2d1, H3c7, H3c6
GO:0005154	epidermal growth factor receptor binding	MF	36	2	0.0204516	Areg, Arf4
GO:0031572	G2 DNA damage checkpoint	BP	36	2	0.0204516	Cdkn1a, Nop53
GO:0070306	lens fiber cell differentiation	BP	36	2	0.0204516	Cdkn1b, Spry2
GO:0036475	neuron death in response to oxidative stress	BP	36	2	0.0204516	Nr4a3, Fbxw7
GO:0000788	nuclear nucleosome	CC	36	2	0.0204516	Cenpa, H3c6
GO:2000191	regulation of fatty acid transport	BP	36	2	0.0204516	Eprs, Irs2
GO:0048169	regulation of long-term neuronal synaptic plasticity	BP	36	2	0.0204516	Bdnf, Egr1
GO:0042493	response to drug	BP	255	5	0.020617	Bdnf, Fos, Jun, Srp14, Rap2a
GO:0045638	negative regulation of myeloid cell differentiation	BP	95	3	0.0206649	Fbxw7, Tob2, Trib1
GO:0010952	positive regulation of peptidase activity	BP	170	4	0.0207682	Bcl2l11, Ccn1, Pmaip1, Tnfrsf23
GO:0007265	Ras protein signal transduction	BP	350	6	0.0210984	Jun, Plk2, Spry2, Rassf1, Arpp19, Rap2a
GO:0042391	regulation of membrane potential	BP	450	7	0.0212363	Bdnf, Jun, Kcnj2, Smad7, Rgs4, Pmaip1, Npas4
GO:0051117	ATPase binding	MF	96	3	0.0212378	Fbl, Snu13, Dnajb1
GO:0071482	cellular response to light stimulus	BP	96	3	0.0212378	Cdkn1a, Pcna, Fbxw7
GO:0060395	SMAD protein signal transduction	BP	96	3	0.0212378	Fos, Jun, Smad7
GO:0071396	cellular response to lipid	BP	555	8	0.0213938	Bdnf, Per1, Sgk1, Yap1, Trib1, Arid5a, Npas4, Mir132
GO:0051130	positive regulation of cellular component organization	BP	1247	14	0.0215267	Adamts1, Bdnf, Bcl2l11, Cdkn1b, Ppp1r15a, Nefl, Rgs2, Sgk1, Fbxw7, Pmaip1, Ndel1, Lrrtm2, Arid5a, Alkal2
GO:0006812	cation transport	BP	1126	13	0.021534	Arc, Cdkn1b, Fth1, Kcnj2, Sik1, Per1, Ptgs2, Rgs2, Rgs4, Sgk1, Homer1, Atp5d, Kcnf1
GO:0001782	B cell homeostasis	BP	37	2	0.0215345	Bcl2l11, Casp3
GO:0030851	granulocyte differentiation	BP	37	2	0.0215345	Cited2, Trib1
GO:0035794	positive regulation of mitochondrial membrane permeabilit...	BP	37	2	0.0215345	Bcl2l11, Pmaip1
GO:0046320	regulation of fatty acid oxidation	BP	37	2	0.0215345	Nr4a3, Irs2
GO:0051493	regulation of cytoskeleton organization	BP	556	8	0.0215966	Cdkn1b, Rgs4, Sgk1, Plk2, Rassf1, Chmp1b, C9orf72, Kif18a
GO:0120162	positive regulation of cold-induced thermogenesis	BP	97	3	0.0218194	Gpr3, Gadd45g, Kdm6b
GO:0043009	chordate embryonic development	BP	779	10	0.0221172	Bcl2l11, Ccnk, Cdk11b, Ccn1, Junb, Maff, Cited2, Pcdh8, Zfand5, Ndel1
GO:0043010	camera-type eye development	BP	354	6	0.0221583	Cdkn1b, Jun, Klf4, Cited2, Spry2, Aldh1a3
GO:0043271	negative regulation of ion transport	BP	174	4	0.0223917	Ptgs2, Rgs2, Rgs4, Irs2
GO:0099565	chemical synaptic transmission, postsynaptic	BP	98	3	0.0224096	Bdnf, Rgs4, Npas4
GO:1903008	organelle disassembly	BP	98	3	0.0224096	Plk3, Fbxw7, Wdr45b
GO:0032652	regulation of interleukin-1 production	BP	98	3	0.0224096	Egr1, Errfi1, Ghsr
GO:0021799	cerebral cortex radially oriented cell migration	BP	38	2	0.0226407	Foxg1, Ndel1
GO:0060674	placenta blood vessel development	BP	38	2	0.0226407	Ccn1, Junb
GO:0032228	regulation of synaptic transmission, GABAergic	BP	38	2	0.0226407	Bdnf, Npas4
GO:1903432	regulation of TORC1 signaling	BP	38	2	0.0226407	Spaar, C9orf72
GO:0032040	small-subunit processome	CC	38	2	0.0226407	Fbl, Snu13
GO:0050821	protein stabilization	BP	176	4	0.0232317	Smad7, Fbxw7, Rassf1, Nop53
GO:0032006	regulation of TOR signaling	BP	100	3	0.023616	Rheb, Spaar, C9orf72
GO:0005719	nuclear euchromatin	CC	39	2	0.02377	Jun, Klf4
GO:1905710	positive regulation of membrane permeability	BP	39	2	0.02377	Bcl2l11, Pmaip1
GO:1902108	regulation of mitochondrial membrane permeability involve...	BP	39	2	0.02377	Bcl2l11, Pmaip1
GO:1903311	regulation of mRNA metabolic process	BP	265	5	0.0238533	Btg2, Cdk11b, Tra2b, Tent5a, Ythdc1
GO:0000075	cell cycle checkpoint	BP	178	4	0.0240906	Cdkn1a, Plk3, Plk2, Nop53
GO:0140014	mitotic nuclear division	BP	266	5	0.0241939	Cdk11b, Cdkn1b, Chmp1b, Ndel1, Kif18a
GO:0099512	supramolecular fiber	CC	908	11	0.0244823	Bcl2l11, Emd, Krt16, Nefl, Tpt1, Spry2, Homer1, Rassf1, Ndel1, Ina, Kif18a
GO:1902107	positive regulation of leukocyte differentiation	BP	179	4	0.0245272	Egr3, Fos, Jun, Trib1
GO:0008270	zinc ion binding	MF	681	9	0.0248262	Adamts1, Egr1, Nr4a1, Mt1, Nr4a3, Nr4a2, Siah2, Zfand5, Eprs
GO:2000106	regulation of leukocyte apoptotic process	BP	102	3	0.024857	Nr4a3, Ghsr, Irs2
GO:0031076	embryonic camera-type eye development	BP	40	2	0.0249219	Cited2, Aldh1a3
GO:0060325	face morphogenesis	BP	40	2	0.0249219	Tiparp, Csrnp1
GO:0015804	neutral amino acid transport	BP	40	2	0.0249219	Rgs2, Rgs4
GO:0048520	positive regulation of behavior	BP	40	2	0.0249219	Nr4a3, Ghsr
GO:0099522	region of cytosol	CC	40	2	0.0249219	Homer1, Dnajb1
GO:0060259	regulation of feeding behavior	BP	40	2	0.0249219	Nr4a3, Ghsr
GO:1902692	regulation of neuroblast proliferation	BP	40	2	0.0249219	Bdnf, Foxg1
GO:0003009	skeletal muscle contraction	BP	40	2	0.0249219	Kcnj2, Homer1
GO:0009792	embryo development ending in birth or egg hatching	BP	796	10	0.0251799	Bcl2l11, Ccnk, Cdk11b, Ccn1, Junb, Maff, Cited2, Pcdh8, Zfand5, Ndel1
GO:0048732	gland development	BP	467	7	0.0253338	Areg, Bcl2l11, Cdkn1b, Jun, Cited2, Aldh1a3, Irs2
GO:0010951	negative regulation of endopeptidase activity	BP	181	4	0.0254147	Nr4a1, Klf4, Ptgs2, Siah2
GO:0006403	RNA localization	BP	181	4	0.0254147	Arc, Fbl, Ranbp2, Ythdc1
GO:0050772	positive regulation of axonogenesis	BP	103	3	0.0254904	Bdnf, Nefl, Ndel1
GO:0045778	positive regulation of ossification	BP	103	3	0.0254904	Ccn1, Jund, Tob2
GO:0048285	organelle fission	BP	468	7	0.0255906	Bcl2l11, Cdk11b, Cdkn1b, Gpr3, Chmp1b, Ndel1, Kif18a
GO:0099081	supramolecular polymer	CC	915	11	0.0257048	Bcl2l11, Emd, Krt16, Nefl, Tpt1, Spry2, Homer1, Rassf1, Ndel1, Ina, Kif18a
GO:0051050	positive regulation of transport	BP	1034	12	0.0257657	Arc, Plk3, Emd, Kcnj2, Nr4a3, Ptgs2, Sgk1, Homer1, Fbxw7, Pard6a, Pmaip1, Irs2
GO:0097060	synaptic membrane	CC	469	7	0.0258491	Arc, Pcdh8, Nptx2, Grasp, Lrrtm2, Ghsr, Kctd12
GO:0009749	response to glucose	BP	182	4	0.0258657	Casp3, Egr1, Tra2b, Irs2
GO:0001965	G-protein alpha-subunit binding	MF	41	2	0.0260962	Rgs2, Rgs4
GO:0002369	T cell cytokine production	BP	41	2	0.0260962	Smad7, Arid5a
GO:0019395	fatty acid oxidation	BP	104	3	0.0261325	Auh, Nr4a3, Irs2
GO:0034766	negative regulation of ion transmembrane transport	BP	104	3	0.0261325	Rgs2, Rgs4, Irs2
GO:0090066	regulation of anatomical structure size	BP	577	8	0.0261764	Bdnf, Ifrd1, Ppp1r15a, Nefl, Ptgs2, Rgs2, Ndel1, Dusp5
GO:0008016	regulation of heart contraction	BP	183	4	0.0263214	Kcnj2, Smad7, Rgs2, Rgs4
GO:0046890	regulation of lipid biosynthetic process	BP	183	4	0.0263214	Egr1, Ccn1, Sik1, Ptgs2
GO:0008610	lipid biosynthetic process	BP	579	8	0.0266453	Egr1, Ccn1, Sik1, Piga, Ptgs2, St8sia4, B3galt2, Aldh1a3
GO:0008306	associative learning	BP	105	3	0.0267833	Btg2, Sgk1, Nptx2
GO:1903426	regulation of reactive oxygen species biosynthetic proces...	BP	105	3	0.0267833	Gla, Klf4, Ptgs2
GO:0043168	anion binding	MF	2725	25	0.0269028	Adamts1, Arf4, Cdk11b, Plk3, Ccn1, Kcnj2, Sik1, Rasd1, Rheb, Sgk1, Plk2, Ddx3y, Hspa14, Aldh1a3, Wdr45b, Rasl11a, Rasl11b, Arl5b, Rap2a, Arl4d, Kti12, Eprs, Plpbp, Kif18a, Gmppb
GO:0005813	centrosome	CC	581	8	0.02712	Plk3, Emd, Smad7, Pcna, Slc16a1, Plk2, Pard6a, Ndel1
GO:0034762	regulation of transmembrane transport	BP	581	8	0.02712	Arc, Kcnj2, Nr4a3, Rgs2, Rgs4, Homer1, Kcnf1, Irs2
GO:0060291	long-term synaptic potentiation	BP	185	4	0.0272473	Arc, Plk2, Lrrtm2, Mir132
GO:0046328	regulation of JNK cascade	BP	185	4	0.0272473	Gadd45b, Per1, Gadd45g, Rap2a
GO:0009746	response to hexose	BP	185	4	0.0272473	Casp3, Egr1, Tra2b, Irs2
GO:0071385	cellular response to glucocorticoid stimulus	BP	42	2	0.0272926	Sgk1, Npas4
GO:0021955	central nervous system neuron axonogenesis	BP	42	2	0.0272926	Nr4a2, Ndel1
GO:0046839	phospholipid dephosphorylation	BP	42	2	0.0272926	Plpp6, Inpp5f
GO:0043539	protein serine/threonine kinase activator activity	MF	42	2	0.0272926	Ccnk, Spry2
GO:0043403	skeletal muscle tissue regeneration	BP	42	2	0.0272926	Ifrd1, Spaar
GO:0007389	pattern specification process	BP	475	7	0.0274378	Arc, Btg2, Egr2, Foxg1, Cited2, Pcdh8, Tra2b
GO:0045639	positive regulation of myeloid cell differentiation	BP	106	3	0.0274427	Fos, Jun, Trib1
GO:0051052	regulation of DNA metabolic process	BP	373	6	0.0276842	Cdkn1a, Klf4, Pcna, Dusp1, Tinf2, Zfp869
GO:0031346	positive regulation of cell projection organization	BP	476	7	0.0277089	Adamts1, Bdnf, Nefl, Rgs2, Sgk1, Ndel1, Alkal2
GO:0034284	response to monosaccharide	BP	186	4	0.0277175	Casp3, Egr1, Tra2b, Irs2
GO:0010506	regulation of autophagy	BP	276	5	0.0277732	Bcl2l11, Plk3, Plk2, Fbxw7, C9orf72
GO:0006412	translation	BP	585	8	0.028087	Btg2, Ppp1r15a, Per1, Rgs2, Rpl21, Rpl9, Rpl22l1, Eprs
GO:0002367	cytokine production involved in immune response	BP	107	3	0.0281107	Smad7, Nr4a3, Arid5a
GO:0030518	intracellular steroid hormone receptor signaling pathway	BP	107	3	0.0281107	Bdnf, Per1, Yap1
GO:0010770	positive regulation of cell morphogenesis involved in dif...	BP	187	4	0.0281925	Bdnf, Nefl, Sgk1, Ndel1
GO:1902742	apoptotic process involved in development	BP	43	2	0.0285107	Bcl2l11, Ccn1
GO:0061049	cell growth involved in cardiac muscle cell development	BP	43	2	0.0285107	Rgs2, Rgs4
GO:0071470	cellular response to osmotic stress	BP	43	2	0.0285107	Casp3, Ptgs2
GO:0042771	intrinsic apoptotic signaling pathway in response to DNA ...	BP	43	2	0.0285107	Cdkn1a, Pmaip1
GO:0003301	physiological cardiac muscle hypertrophy	BP	43	2	0.0285107	Rgs2, Rgs4
GO:0003298	physiological muscle hypertrophy	BP	43	2	0.0285107	Rgs2, Rgs4
GO:0003205	cardiac chamber development	BP	188	4	0.0286723	Adamts1, Ccn1, Smad7, Cited2
GO:0050796	regulation of insulin secretion	BP	188	4	0.0286723	Slc16a1, Midn, Ghsr, Irs2
GO:0051783	regulation of nuclear division	BP	188	4	0.0286723	Cdk11b, Cdkn1b, Gpr3, Chmp1b
GO:0034754	cellular hormone metabolic process	BP	108	3	0.0287873	Egr1, Aldh1a3, Tiparp
GO:0021987	cerebral cortex development	BP	108	3	0.0287873	Foxg1, Tra2b, Ndel1
GO:0051028	mRNA transport	BP	108	3	0.0287873	Arc, Ranbp2, Ythdc1
GO:0090287	regulation of cellular response to growth factor stimulus	BP	280	5	0.0292942	Ccn1, Smad7, Cited2, Spry2, Rasl11b
GO:0045121	membrane raft	CC	379	6	0.0296026	Arc, Casp3, Ptgs2, Tnfrsf23, Ghsr, Kif18a
GO:0044706	multi-multicellular organism process	BP	190	4	0.0296465	Junb, Cited2, Ptgs2, Ghsr
GO:0007416	synapse assembly	BP	190	4	0.0296465	Bdnf, Lrrtm2, Ghsr, Npas4
GO:0032924	activin receptor signaling pathway	BP	44	2	0.0297503	Smad7, Cited2
GO:0034198	cellular response to amino acid starvation	BP	44	2	0.0297503	Atf3, Cdkn1a
GO:0071384	cellular response to corticosteroid stimulus	BP	44	2	0.0297503	Sgk1, Npas4
GO:0007080	mitotic metaphase plate congression	BP	44	2	0.0297503	Chmp1b, Kif18a
GO:0010972	negative regulation of G2/M transition of mitotic cell cy...	BP	44	2	0.0297503	Cdkn1a, Nop53
GO:0051898	negative regulation of protein kinase B signaling	BP	44	2	0.0297503	Klf4, Nop53
GO:0045823	positive regulation of heart contraction	BP	44	2	0.0297503	Rgs2, Rgs4
GO:0016925	protein sumoylation	BP	44	2	0.0297503	Egr1, Egr2
GO:0098857	membrane microdomain	CC	380	6	0.0299306	Arc, Casp3, Ptgs2, Tnfrsf23, Ghsr, Kif18a
GO:0030307	positive regulation of cell growth	BP	191	4	0.0301409	Bdnf, Smad7, Sgk1, Ndel1
GO:0035967	cellular response to topologically incorrect protein	BP	110	3	0.0301663	Atf3, Ppp1r15a, Hspa14
GO:0032612	interleukin-1 production	BP	110	3	0.0301663	Egr1, Errfi1, Ghsr
GO:0030072	peptide hormone secretion	BP	283	5	0.0304689	Slc16a1, Midn, Ghsr, Vgf, Irs2
GO:0019866	organelle inner membrane	CC	486	7	0.0305208	Bdnf, Emd, Slc25a3, Ptgs2, Tra2b, Atp5d, Coq10b
GO:0060070	canonical Wnt signaling pathway	BP	284	5	0.030867	Egr1, Emd, Klf4, Siah2, Yap1
GO:0008637	apoptotic mitochondrial changes	BP	111	3	0.0308687	Bcl2l11, Jun, Pmaip1
GO:0034440	lipid oxidation	BP	111	3	0.0308687	Auh, Nr4a3, Irs2
GO:0022411	cellular component disassembly	BP	383	6	0.0309289	Plk3, Sgk1, Fbxw7, Wdr45b, Ndel1, Kif18a
GO:0089718	amino acid import across plasma membrane	BP	45	2	0.031011	Rgs2, Rgs4
GO:0042181	ketone biosynthetic process	BP	45	2	0.031011	Egr1, Coq10b
GO:0032873	negative regulation of stress-activated MAPK cascade	BP	45	2	0.031011	Per1, Dusp1
GO:0070303	negative regulation of stress-activated protein kinase si...	BP	45	2	0.031011	Per1, Dusp1
GO:0030890	positive regulation of B cell proliferation	BP	45	2	0.031011	Cdkn1a, Irs2
GO:0010907	positive regulation of glucose metabolic process	BP	45	2	0.031011	Arpp19, Irs2
GO:0010824	regulation of centrosome duplication	BP	45	2	0.031011	Plk2, Chmp1b
GO:0048536	spleen development	BP	45	2	0.031011	Bcl2l11, Cited2
GO:0060412	ventricular septum morphogenesis	BP	45	2	0.031011	Smad7, Cited2
GO:0006323	DNA packaging	BP	193	4	0.0311442	Nap1l5, Spty2d1, H3c7, H3c6
GO:0150034	distal axon	CC	384	6	0.0312665	Bdnf, Nefl, Pard6a, C9orf72, Ndel1, Blvrb
GO:0031647	regulation of protein stability	BP	285	5	0.0312683	Casp3, Smad7, Fbxw7, Rassf1, Nop53
GO:0034765	regulation of ion transmembrane transport	BP	489	7	0.0314005	Arc, Kcnj2, Rgs2, Rgs4, Homer1, Kcnf1, Irs2
GO:0042100	B cell proliferation	BP	112	3	0.0315797	Casp3, Cdkn1a, Irs2
GO:2000379	positive regulation of reactive oxygen species metabolic ...	BP	112	3	0.0315797	Cdkn1a, Klf4, Ptgs2
GO:0045321	leukocyte activation	BP	947	11	0.0318639	Casp3, Cdkn1a, Egr1, Egr3, Jun, Smad7, Nr4a3, Gadd45g, Impdh2, Irf2bp2, Irs2
GO:0044295	axonal growth cone	CC	46	2	0.0322926	Pard6a, C9orf72
GO:0140296	general transcription initiation factor binding	MF	46	2	0.0322926	Fbl, Taf13
GO:0060323	head morphogenesis	BP	46	2	0.0322926	Tiparp, Csrnp1
GO:0045740	positive regulation of DNA replication	BP	46	2	0.0322926	Jun, Pcna
GO:0045429	positive regulation of nitric oxide biosynthetic process	BP	46	2	0.0322926	Klf4, Ptgs2
GO:0010518	positive regulation of phospholipase activity	BP	46	2	0.0322926	Arf4, Ccn1
GO:0061098	positive regulation of protein tyrosine kinase activity	BP	46	2	0.0322926	Areg, Fbxw7
GO:0010799	regulation of peptidyl-threonine phosphorylation	BP	46	2	0.0322926	Smad7, Spry2
GO:0038202	TORC1 signaling	BP	46	2	0.0322926	Spaar, C9orf72
GO:0008585	female gonad development	BP	113	3	0.0322992	Adamts1, Tiparp, Vgf
GO:0030516	regulation of axon extension	BP	113	3	0.0322992	Bdnf, Ifrd1, Ndel1
GO:1901565	organonitrogen compound catabolic process	BP	1193	13	0.0323006	Gla, Auh, Plk3, Smad7, Siah2, Plk2, Ubc, Fbxw7, Nop53, Fbxo33, Tiparp, Trib1, Blvrb
GO:0006511	ubiquitin-dependent protein catabolic process	BP	602	8	0.0324641	Plk3, Smad7, Siah2, Plk2, Fbxw7, Nop53, Fbxo33, Trib1
GO:0005681	spliceosomal complex	CC	196	4	0.0326859	Rheb, Tra2b, Snu13, Cwc25
GO:0001892	embryonic placenta development	BP	114	3	0.0330272	Ccn1, Junb, Cited2
GO:0060078	regulation of postsynaptic membrane potential	BP	114	3	0.0330272	Bdnf, Rgs4, Npas4
GO:0006939	smooth muscle contraction	BP	114	3	0.0330272	Ptgs2, Rgs2, Ghsr
GO:0051603	proteolysis involved in cellular protein catabolic proces...	BP	718	9	0.0331928	Plk3, Smad7, Siah2, Plk2, Ubc, Fbxw7, Nop53, Fbxo33, Trib1
GO:1990138	neuron projection extension	BP	197	4	0.0332095	Bdnf, Ifrd1, C9orf72, Ndel1
GO:0070888	E-box binding	MF	47	2	0.0335947	Per1, Ciart
GO:1904407	positive regulation of nitric oxide metabolic process	BP	47	2	0.0335947	Klf4, Ptgs2
GO:0042088	T-helper 1 type immune response	BP	47	2	0.0335947	Gadd45g, Arid5a
GO:0001649	osteoblast differentiation	BP	198	4	0.0337381	Areg, Ccn1, Junb, Jund
GO:0016579	protein deubiquitination	BP	115	3	0.0337638	Nop53, Otud1, Josd1
GO:0015630	microtubule cytoskeleton	CC	1201	13	0.033808	Bcl2l11, Plk3, Emd, Smad7, Pcna, Slc16a1, Plk2, Tpt1, Spry2, Rassf1, Pard6a, Ndel1, Kif18a
GO:0043043	peptide biosynthetic process	BP	607	8	0.0338356	Btg2, Ppp1r15a, Per1, Rgs2, Rpl21, Rpl9, Rpl22l1, Eprs
GO:0006839	mitochondrial transport	BP	199	4	0.0342715	Bcl2l11, Fbxw7, Pmaip1, Atp5d
GO:0098589	membrane region	CC	393	6	0.0344133	Arc, Casp3, Ptgs2, Tnfrsf23, Ghsr, Kif18a
GO:0046545	development of primary female sexual characteristics	BP	116	3	0.0345088	Adamts1, Tiparp, Vgf
GO:0051952	regulation of amine transport	BP	116	3	0.0345088	Rgs2, Rgs4, Ghsr
GO:0048814	regulation of dendrite morphogenesis	BP	116	3	0.0345088	Arc, Sgk1, Rap2a
GO:0009743	response to carbohydrate	BP	200	4	0.0348098	Casp3, Egr1, Tra2b, Irs2
GO:0030331	estrogen receptor binding	MF	48	2	0.034917	Pcna, Arid5a
GO:1990928	response to amino acid starvation	BP	48	2	0.034917	Atf3, Cdkn1a
GO:0032813	tumor necrosis factor receptor superfamily binding	MF	48	2	0.034917	Bdnf, Casp3
GO:0000086	G2/M transition of mitotic cell cycle	BP	117	3	0.0352624	Cdkn1a, Arpp19, Nop53
GO:2000177	regulation of neural precursor cell proliferation	BP	117	3	0.0352624	Bdnf, Btg2, Foxg1
GO:0006986	response to unfolded protein	BP	117	3	0.0352624	Atf3, Ppp1r15a, Hspa14
GO:1902533	positive regulation of intracellular signal transduction	BP	963	11	0.0353098	Bcl2l11, Gpr3, Jun, Gadd45b, Rheb, Gadd45g, Spry2, Fbxw7, Pmaip1, Arpp19, Alkal2
GO:0010608	posttranscriptional regulation of gene expression	BP	503	7	0.0357312	Btg2, Ppp1r15a, Per1, Rgs2, Eprs, Tent5a, Ythdc1
GO:0003924	GTPase activity	MF	296	5	0.0358996	Rasd1, Rheb, Rasl11a, Rasl11b, Rap2a
GO:0097435	supramolecular fiber organization	BP	729	9	0.0360174	Cdkn1b, Plk3, Nefl, Rgs4, Sgk1, C9orf72, Ndel1, Ghsr, Kif18a
GO:0043090	amino acid import	BP	49	2	0.0362593	Rgs2, Rgs4
GO:0015459	potassium channel regulator activity	MF	49	2	0.0362593	Sgk1, Arpp19
GO:2000725	regulation of cardiac muscle cell differentiation	BP	49	2	0.0362593	Rgs2, Rgs4
GO:1902041	regulation of extrinsic apoptotic signaling pathway via d...	BP	49	2	0.0362593	Atf3, Tnfrsf23
GO:0005819	spindle	CC	297	5	0.0363405	Plk3, Emd, Plk2, Tpt1, Kif18a
GO:0060589	nucleoside-triphosphatase regulator activity	MF	298	5	0.0367847	Jun, Ranbp2, Rgs2, Rgs4, Dnajb1
GO:0008015	blood circulation	BP	507	7	0.0370377	Kcnj2, Smad7, Ptgs2, Rgs2, Rgs4, C2cd4b, Dusp5
GO:0001046	core promoter sequence-specific DNA binding	MF	50	2	0.0376212	Egr1, Fos
GO:0021545	cranial nerve development	BP	50	2	0.0376212	Egr2, Cited2
GO:0000791	euchromatin	CC	50	2	0.0376212	Jun, Klf4
GO:0030544	Hsp70 protein binding	MF	50	2	0.0376212	Cdkn1b, Dnajb1
GO:1902475	L-alpha-amino acid transmembrane transport	BP	50	2	0.0376212	Rgs2, Rgs4
GO:0005771	multivesicular body	CC	50	2	0.0376212	Tpt1, Chmp1b
GO:0010677	negative regulation of cellular carbohydrate metabolic pr...	BP	50	2	0.0376212	Sik1, Midn
GO:0043392	negative regulation of DNA binding	BP	50	2	0.0376212	Jun, Fbxw7
GO:0060043	regulation of cardiac muscle cell proliferation	BP	50	2	0.0376212	Cited2, Yap1
GO:0031146	SCF-dependent proteasomal ubiquitin-dependent protein cat...	BP	50	2	0.0376212	Fbxw7, Fbxo33
GO:0044248	cellular catabolic process	BP	1999	19	0.0377087	Gla, Auh, Bcl2l11, Btg2, Plk3, Smad7, Siah2, Plk2, Ubc, Fbxw7, Wdr45b, Nop53, Fbxo33, C9orf72, Inpp5f, Trib1, Tent5a, Blvrb, Irs2
GO:0046872	metal ion binding	MF	3518	30	0.0379105	Adamts1, Cdkn1a, Egr1, Egr2, Egr3, Egr4, Fth1, Nr4a1, Klf4, Smad7, Sik1, Mt1, Nr4a3, Nr4a2, Pcdh8, Ptgs2, Ranbp2, Rheb, Siah2, Tpt1, Zfand5, Impdh2, Nptx2, Rassf1, Sap30, Rap2a, Tiparp, Eprs, Kdm6b, Irf2bp2
GO:1902115	regulation of organelle assembly	BP	206	4	0.038143	Plk2, Chmp1b, C9orf72, Lrrtm2
GO:0015837	amine transport	BP	121	3	0.0383612	Rgs2, Rgs4, Ghsr
GO:0090101	negative regulation of transmembrane receptor protein ser...	BP	121	3	0.0383612	Smad7, Spry2, Rasl11b
GO:0042542	response to hydrogen peroxide	BP	121	3	0.0383612	Casp3, Nr4a3, Kdm6b
GO:0031929	TOR signaling	BP	121	3	0.0383612	Rheb, Spaar, C9orf72
GO:0051051	negative regulation of transport	BP	511	7	0.0383754	Ptgs2, Rgs2, Rgs4, Midn, Lrrtm2, Ghsr, Irs2
GO:0031345	negative regulation of cell projection organization	BP	207	4	0.0387157	Ifrd1, Plk2, Spry2, Inpp5f
GO:0060428	lung epithelium development	BP	51	2	0.0390026	Yap1, Errfi1
GO:0030857	negative regulation of epithelial cell differentiation	BP	51	2	0.0390026	Yap1, Spry2
GO:0002673	regulation of acute inflammatory response	BP	51	2	0.0390026	Ptgs2, C2cd4b
GO:0003279	cardiac septum development	BP	122	3	0.039157	Ccn1, Smad7, Cited2
GO:0035821	modulation of process of other organism	BP	122	3	0.039157	Bcl2l11, Ccnk, Jun
GO:0050770	regulation of axonogenesis	BP	208	4	0.0392933	Bdnf, Ifrd1, Nefl, Ndel1
GO:0030426	growth cone	CC	209	4	0.0398759	Nefl, Pard6a, C9orf72, Ndel1
GO:1903409	reactive oxygen species biosynthetic process	BP	123	3	0.0399611	Gla, Klf4, Ptgs2
GO:0005871	kinesin complex	CC	52	2	0.040403	Ndel1, Kif18a
GO:1904036	negative regulation of epithelial cell apoptotic process	BP	52	2	0.040403	Scg2, Yap1
GO:0010828	positive regulation of glucose transmembrane transport	BP	52	2	0.040403	Nr4a3, Irs2
GO:0032355	response to estradiol	BP	52	2	0.040403	Areg, Fosl2
GO:0017111	nucleoside-triphosphatase activity	MF	745	9	0.0404149	Rasd1, Rheb, Ddx3y, Hspa14, Atp5d, Rasl11a, Rasl11b, Rap2a, Kif18a
GO:0036094	small molecule binding	MF	2423	22	0.0406464	Arf4, Cdk11b, Plk3, Sik1, Rasd1, Rheb, Sgk1, Plk2, Impdh2, Ddx3y, Hspa14, Aldh1a3, Rasl11a, Rasl11b, Arl5b, Rap2a, Arl4d, Kti12, Eprs, Plpbp, Kif18a, Gmppb
GO:0051963	regulation of synapse assembly	BP	124	3	0.0407736	Bdnf, Lrrtm2, Ghsr
GO:0001650	fibrillar center	CC	125	3	0.0415944	Fbl, Smad7, Nop53
GO:0021795	cerebral cortex cell migration	BP	53	2	0.0418222	Foxg1, Ndel1
GO:0046676	negative regulation of insulin secretion	BP	53	2	0.0418222	Midn, Ghsr
GO:0051955	regulation of amino acid transport	BP	53	2	0.0418222	Rgs2, Rgs4
GO:0031113	regulation of microtubule polymerization	BP	53	2	0.0418222	Cdkn1b, Sgk1
GO:0046902	regulation of mitochondrial membrane permeability	BP	53	2	0.0418222	Bcl2l11, Pmaip1
GO:2000677	regulation of transcription regulatory region DNA binding	BP	53	2	0.0418222	Klf4, Fbxw7
GO:1903037	regulation of leukocyte cell-cell adhesion	BP	309	5	0.0418923	Casp3, Egr3, Klf4, Smad7, Nr4a3
GO:0043209	myelin sheath	CC	213	4	0.0422554	Nefl, Slc25a3, Ubc, Ina
GO:0005882	intermediate filament	CC	126	3	0.0424235	Krt16, Nefl, Ina
GO:0014902	myotube differentiation	BP	126	3	0.0424235	Bdnf, Sik1, Homer1
GO:0120254	olefinic compound metabolic process	BP	126	3	0.0424235	Egr1, Ptgs2, Aldh1a3
GO:0006611	protein export from nucleus	BP	126	3	0.0424235	Egr2, Emd, Ythdc1
GO:0051101	regulation of DNA binding	BP	126	3	0.0424235	Jun, Klf4, Fbxw7
GO:0006518	peptide metabolic process	BP	752	9	0.0424488	Btg2, Casp3, Ppp1r15a, Per1, Rgs2, Rpl21, Rpl9, Rpl22l1, Eprs
GO:1990234	transferase complex	CC	752	9	0.0424488	Ccnk, Cdkn1a, Pcna, Piga, Fbxw7, Fbxo33, C9orf72, Taf13, Kdm6b
GO:0070374	positive regulation of ERK1 and ERK2 cascade	BP	214	4	0.0428626	Jun, Spry2, Fbxw7, Alkal2
GO:0030001	metal ion transport	BP	873	10	0.0429311	Cdkn1b, Fth1, Kcnj2, Sik1, Per1, Ptgs2, Rgs4, Sgk1, Homer1, Kcnf1
GO:0051090	regulation of DNA-binding transcription factor activity	BP	415	6	0.0429464	Bdnf, Ifrd1, Klf4, Smad7, Sik1, Trib1
GO:0051129	negative regulation of cellular component organization	BP	754	9	0.0430423	Ifrd1, Sgk1, Plk2, Spry2, Tinf2, Nop53, Dnajb1, Inpp5f, Lrrtm2
GO:0008375	acetylglucosaminyltransferase activity	MF	54	2	0.0432599	Piga, B3galt2
GO:0061077	chaperone-mediated protein folding	BP	54	2	0.0432599	Hspa14, Dnajb1
GO:0007019	microtubule depolymerization	BP	54	2	0.0432599	Sgk1, Kif18a
GO:0045687	positive regulation of glial cell differentiation	BP	54	2	0.0432599	Egr2, Rheb
GO:0051289	protein homotetramerization	BP	54	2	0.0432599	Kcnj2, Aldh1a3
GO:0060048	cardiac muscle contraction	BP	127	3	0.0432608	Kcnj2, Smad7, Rgs2
GO:0060996	dendritic spine development	BP	127	3	0.0432608	Arc, Arf4, Plk2
GO:0090090	negative regulation of canonical Wnt signaling pathway	BP	127	3	0.0432608	Egr1, Emd, Siah2
GO:0008277	regulation of G protein-coupled receptor signaling pathwa...	BP	127	3	0.0432608	Rgs2, Rgs4, Kctd12
GO:0071944	cell periphery	CC	5308	42	0.0436868	Arc, Arf4, Casp3, Emd, Gpr3, Gpr19, Kcnj2, Smad7, Pcdh8, Ptgs2, Ptp4a1, Rasd1, Rgs2, Rgs4, Rheb, Sgk1, Slc16a1, Snu13, Spry2, Homer1, Hspa14, Pvr, Nptx2, Grasp, Pard6a, Mlip, Errfi1, Josd1, Rap2a, Tnfrsf23, Arl4d, Inpp5f, Lrrtm2, Eprs, Ghsr, Kif18a, Ythdc1, Blvrb, Kctd12, Frmd6, Kcnf1, Irs2
GO:0030324	lung development	BP	216	4	0.0440917	Yap1, Spry2, Fbxw7, Errfi1
GO:0030427	site of polarized growth	CC	216	4	0.0440917	Nefl, Pard6a, C9orf72, Ndel1
GO:0042633	hair cycle	BP	128	3	0.0441065	Krt16, Per1, Ptgs2
GO:0042303	molting cycle	BP	128	3	0.0441065	Krt16, Per1, Ptgs2
GO:0061387	regulation of extent of cell growth	BP	128	3	0.0441065	Bdnf, Ifrd1, Ndel1
GO:1990904	ribonucleoprotein complex	CC	758	9	0.0442463	Fbl, Rheb, Rpl21, Rpl9, Tra2b, Srp14, Snu13, Cwc25, Eprs
GO:0045912	negative regulation of carbohydrate metabolic process	BP	55	2	0.0447159	Sik1, Midn
GO:1902750	negative regulation of cell cycle G2/M phase transition	BP	55	2	0.0447159	Cdkn1a, Nop53
GO:0050732	negative regulation of peptidyl-tyrosine phosphorylation	BP	55	2	0.0447159	Errfi1, Inpp5f
GO:0002720	positive regulation of cytokine production involved in im...	BP	55	2	0.0447159	Nr4a3, Arid5a
GO:0045604	regulation of epidermal cell differentiation	BP	55	2	0.0447159	Maff, Errfi1
GO:0098590	plasma membrane region	CC	1255	13	0.0453351	Arc, Arf4, Pcdh8, Ptgs2, Slc16a1, Nptx2, Grasp, Pard6a, Inpp5f, Lrrtm2, Ghsr, Kif18a, Kctd12
GO:0005886	plasma membrane	CC	5175	41	0.0454042	Arc, Arf4, Casp3, Gpr3, Gpr19, Kcnj2, Smad7, Pcdh8, Ptgs2, Ptp4a1, Rasd1, Rgs2, Rgs4, Rheb, Sgk1, Slc16a1, Snu13, Spry2, Homer1, Hspa14, Pvr, Nptx2, Grasp, Pard6a, Mlip, Errfi1, Josd1, Rap2a, Tnfrsf23, Arl4d, Inpp5f, Lrrtm2, Eprs, Ghsr, Kif18a, Ythdc1, Blvrb, Kctd12, Frmd6, Kcnf1, Irs2
GO:0051640	organelle localization	BP	531	7	0.0455392	Cenpa, Nefl, Nr4a3, Spry2, Chmp1b, Ndel1, Kif18a
GO:0007631	feeding behavior	BP	130	3	0.0458224	Bdnf, Nr4a3, Ghsr
GO:0044242	cellular lipid catabolic process	BP	219	4	0.0459722	Gla, Auh, Inpp5f, Irs2
GO:0030323	respiratory tube development	BP	219	4	0.0459722	Yap1, Spry2, Fbxw7, Errfi1
GO:0098609	cell-cell adhesion	BP	764	9	0.0460943	Casp3, Egr3, Ccn1, Klf4, Smad7, Cited2, Nr4a3, Pcdh8, Pvr
GO:0050873	brown fat cell differentiation	BP	56	2	0.0461898	Ptgs2, Rgs2
GO:0051932	synaptic transmission, GABAergic	BP	56	2	0.0461898	Bdnf, Npas4
GO:0048538	thymus development	BP	56	2	0.0461898	Bcl2l11, Cited2
GO:0006914	autophagy	BP	423	6	0.0463514	Bcl2l11, Plk3, Plk2, Fbxw7, Wdr45b, C9orf72
GO:0061919	process utilizing autophagic mechanism	BP	423	6	0.0463514	Bcl2l11, Plk3, Plk2, Fbxw7, Wdr45b, C9orf72
GO:0019898	extrinsic component of membrane	CC	318	5	0.046375	Bcl2l11, Smad7, Nptx2, Wdr45b, Errfi1
GO:0021953	central nervous system neuron differentiation	BP	220	4	0.0466089	Btg2, Foxg1, Nr4a2, Ndel1
GO:0016020	membrane	CC	9291	68	0.0466535	Arc, Areg, Arf4, Bdnf, Bcl2l11, Casp3, Emd, Fos, Gpr3, Gpr19, Nr4a1, Kcnj2, Smad7, Mest, Ppp1r15a, Pcdh8, Slc25a3, Piga, Ptgs2, Ptp4a1, Ranbp2, Rasd1, Rgs2, Rgs4, Rheb, Sgk1, St8sia4, Tra2b, Slc16a1, Snu13, Yap1, Spry2, Homer1, B3galt2, Hspa14, Fbxw7, Pvr, Nptx2, Grasp, Pard6a, Atp5d, Wdr45b, Chmp1b, Coq10b, Rasl11a, Rasl11b, Mlip, Spaar, C9orf72, Errfi1, Josd1, Plpp6, Rap2a, Tnfrsf23, Arl4d, Inp…
GO:0034763	negative regulation of transmembrane transport	BP	131	3	0.0466927	Rgs2, Rgs4, Irs2
GO:0044257	cellular protein catabolic process	BP	767	9	0.0470374	Plk3, Smad7, Siah2, Plk2, Ubc, Fbxw7, Nop53, Fbxo33, Trib1
GO:0060047	heart contraction	BP	221	4	0.0472505	Kcnj2, Smad7, Rgs2, Rgs4
GO:1903708	positive regulation of hemopoiesis	BP	221	4	0.0472505	Egr3, Fos, Jun, Trib1
GO:0007569	cell aging	BP	132	3	0.0475711	Cdkn1a, Plk2, Mir132
GO:0050879	multicellular organismal movement	BP	57	2	0.0476815	Kcnj2, Homer1
GO:0050881	musculoskeletal movement	BP	57	2	0.0476815	Kcnj2, Homer1
GO:0043536	positive regulation of blood vessel endothelial cell migr...	BP	57	2	0.0476815	Ptgs2, Plk2
GO:0007585	respiratory gaseous exchange by respiratory system	BP	57	2	0.0476815	Nr4a2, Zfand5
GO:0022604	regulation of cell morphogenesis	BP	537	7	0.0478453	Arc, Bdnf, Ifrd1, Nefl, Sgk1, Rap2a, Ndel1
GO:0007568	aging	BP	222	4	0.047897	Cdkn1a, Krt16, Plk2, Mir132
GO:0002682	regulation of immune system process	BP	1396	14	0.0483011	Casp3, Cdkn1a, Egr3, Fos, Jun, Smad7, Nr4a3, Dusp1, Fbxw7, Tob2, Nop53, Trib1, Arid5a, Irs2
GO:0005768	endosome	CC	894	10	0.0489691	Arc, Cdkn1b, Ptp4a1, Siah2, Tpt1, Chmp1b, Spaar, C9orf72, Rap2a, Inpp5f
GO:0001825	blastocyst formation	BP	58	2	0.0491906	Junb, Cited2
GO:0003018	vascular process in circulatory system	BP	224	4	0.0492046	Ptgs2, Rgs2, C2cd4b, Dusp5
GO:0044839	cell cycle G2/M phase transition	BP	134	3	0.0493522	Cdkn1a, Arpp19, Nop53
GO:1903038	negative regulation of leukocyte cell-cell adhesion	BP	134	3	0.0493522	Casp3, Klf4, Smad7
GO:0048872	homeostasis of number of cells	BP	324	5	0.0495163	Bcl2l11, Casp3, Cited2, Pmaip1, Tnfrsf23
GO:0043169	cation binding	MF	3606	30	0.0498405	Adamts1, Cdkn1a, Egr1, Egr2, Egr3, Egr4, Fth1, Nr4a1, Klf4, Smad7, Sik1, Mt1, Nr4a3, Nr4a2, Pcdh8, Ptgs2, Ranbp2, Rheb, Siah2, Tpt1, Zfand5, Impdh2, Nptx2, Rassf1, Sap30, Rap2a, Tiparp, Eprs, Kdm6b, Irf2bp2

## Sheet: NK1t vs. NS1t, GO-down
ID	Term	Ont	N	Down	P.Down	Genes.Down
GO:0005575	cellular_component	CC	21078	36	0.000263664	Gja5, Mrc2, Rpl10a, Sox12, Trp63, Ing4, Fbxl8, Tmod4, Wwc2, Septin1, Hgh1, Mplkip, Ccer1, Med18, Zcchc3, Atp5g2, Ndufb4, Dennd2d, Bcl9, Pus7l, AI115009, Ppp1r3e, Vmac, Acot3, BC016579, Gpbar1, Zfp418, Palb2, Parp3, Lrrc3, Vash1, Vsig8, Gdpgp1, Gm5106, Scarna13, Gm10814
GO:0036342	post-anal tail morphogenesis	BP	25	2	0.000447608	Trp63, Palb2
GO:2000772	regulation of cellular senescence	BP	42	2	0.00126753	Trp63, Vash1
GO:0046621	negative regulation of organ growth	BP	43	2	0.00132832	Wwc2, Zfp418
GO:0005622	intracellular	CC	13918	27	0.00162039	Rpl10a, Sox12, Trp63, Ing4, Fbxl8, Tmod4, Wwc2, Septin1, Mplkip, Med18, Zcchc3, Atp5g2, Ndufb4, Dennd2d, Bcl9, Pus7l, Ppp1r3e, Vmac, Acot3, BC016579, Gpbar1, Zfp418, Palb2, Parp3, Vash1, Vsig8, Gdpgp1
GO:0090342	regulation of cell aging	BP	49	2	0.00172175	Trp63, Vash1
GO:0003712	transcription coregulator activity	MF	440	4	0.00216421	Sox12, Ing4, Med18, Bcl9
GO:0035019	somatic stem cell population maintenance	BP	58	2	0.00240303	Trp63, Bcl9
GO:0060537	muscle tissue development	BP	466	4	0.00266253	Gja5, Trp63, Bcl9, Zfp418
GO:0022402	cell cycle process	BP	1139	6	0.00270288	Trp63, Ing4, Fbxl8, Septin1, Parp3, Vash1
GO:0090398	cellular senescence	BP	65	2	0.00300717	Trp63, Vash1
GO:0003713	transcription coactivator activity	MF	232	3	0.0030358	Sox12, Ing4, Bcl9
GO:0007049	cell cycle	BP	1641	7	0.00382095	Trp63, Ing4, Fbxl8, Septin1, Mplkip, Parp3, Vash1
GO:0045926	negative regulation of growth	BP	263	3	0.00431316	Ing4, Wwc2, Zfp418
GO:0006139	nucleobase-containing compound metabolic process	BP	5025	13	0.00619073	Rpl10a, Sox12, Trp63, Ing4, Wwc2, Med18, Atp5g2, Bcl9, Pus7l, Acot3, Zfp418, Palb2, Parp3
GO:0051241	negative regulation of multicellular organismal process	BP	1350	6	0.00619337	Gja5, Trp63, Wwc2, Zfp418, Parp3, Vash1
GO:0051726	regulation of cell cycle	BP	964	5	0.0066888	Trp63, Ing4, Fbxl8, Parp3, Vash1
GO:0051146	striated muscle cell differentiation	BP	316	3	0.0071633	Tmod4, Bcl9, Zfp418
GO:0003674	molecular_function	MF	20522	33	0.00736165	Gja5, Mrc2, Rpl10a, Sox12, Trp63, Ing4, Tmod4, Wwc2, Septin1, Hgh1, Mplkip, Ccer1, Med18, Zcchc3, Atp5g2, Ndufb4, Dennd2d, Bcl9, Pus7l, AI115009, Ppp1r3e, Vmac, Acot3, BC016579, Gpbar1, Zfp418, Palb2, Parp3, Vash1, Gdpgp1, Gm5106, Scarna13, Gm10814
GO:0046483	heterocycle metabolic process	BP	5159	13	0.00775004	Rpl10a, Sox12, Trp63, Ing4, Wwc2, Med18, Atp5g2, Bcl9, Pus7l, Acot3, Zfp418, Palb2, Parp3
GO:0007498	mesoderm development	BP	113	2	0.00881043	Trp63, Palb2
GO:0006725	cellular aromatic compound metabolic process	BP	5239	13	0.0088235	Rpl10a, Sox12, Trp63, Ing4, Wwc2, Med18, Atp5g2, Bcl9, Pus7l, Acot3, Zfp418, Palb2, Parp3
GO:0032991	protein-containing complex	CC	5259	13	0.0091098	Gja5, Rpl10a, Sox12, Trp63, Ing4, Fbxl8, Septin1, Med18, Atp5g2, Ndufb4, Bcl9, Ppp1r3e, Gpbar1
GO:0046620	regulation of organ growth	BP	120	2	0.00988662	Wwc2, Zfp418
GO:0040007	growth	BP	1080	5	0.0106402	Ing4, Wwc2, Bcl9, Zfp418, Palb2
GO:0051093	negative regulation of developmental process	BP	1082	5	0.0107198	Trp63, Wwc2, Zfp418, Parp3, Vash1
GO:0050678	regulation of epithelial cell proliferation	BP	371	3	0.0110758	Trp63, Gpbar1, Vash1
GO:0098800	inner mitochondrial membrane protein complex	CC	129	2	0.0113517	Atp5g2, Ndufb4
GO:0048640	negative regulation of developmental growth	BP	130	2	0.01152	Wwc2, Zfp418
GO:0007569	cell aging	BP	132	2	0.01186	Trp63, Vash1
GO:1901360	organic cyclic compound metabolic process	BP	5449	13	0.0122202	Rpl10a, Sox12, Trp63, Ing4, Wwc2, Med18, Atp5g2, Bcl9, Pus7l, Acot3, Zfp418, Palb2, Parp3
GO:0072331	signal transduction by p53 class mediator	BP	135	2	0.0123783	Trp63, Ing4
GO:0007050	cell cycle arrest	BP	137	2	0.0127292	Ing4, Vash1
GO:0042692	muscle cell differentiation	BP	398	3	0.0133701	Tmod4, Bcl9, Zfp418
GO:0005737	cytoplasm	CC	11029	21	0.0135147	Rpl10a, Trp63, Ing4, Fbxl8, Tmod4, Wwc2, Septin1, Mplkip, Zcchc3, Atp5g2, Ndufb4, Dennd2d, Bcl9, Ppp1r3e, Vmac, Acot3, BC016579, Gpbar1, Parp3, Vash1, Gdpgp1
GO:0035113	embryonic appendage morphogenesis	BP	142	2	0.0136255	Gja5, Trp63
GO:0030326	embryonic limb morphogenesis	BP	142	2	0.0136255	Gja5, Trp63
GO:0006974	cellular response to DNA damage stimulus	BP	747	4	0.0137598	Trp63, Ing4, Palb2, Parp3
GO:0007043	cell-cell junction assembly	BP	144	2	0.0139915	Gja5, Gpbar1
GO:0003012	muscle system process	BP	408	3	0.0142838	Gja5, Tmod4, Zfp418
GO:0030496	midbody	CC	147	2	0.0145485	Septin1, Mplkip
GO:0048646	anatomical structure formation involved in morphogenesis	BP	1183	5	0.015298	Gja5, Trp63, Tmod4, Palb2, Vash1
GO:0048589	developmental growth	BP	778	4	0.0157561	Wwc2, Bcl9, Zfp418, Palb2
GO:0090575	RNA polymerase II transcription regulator complex	CC	159	2	0.0168706	Med18, Bcl9
GO:0050673	epithelial cell proliferation	BP	437	3	0.0171313	Trp63, Gpbar1, Vash1
GO:0045111	intermediate filament cytoskeleton	CC	162	2	0.0174743	Ing4, Vmac
GO:0014706	striated muscle tissue development	BP	443	3	0.0177574	Gja5, Bcl9, Zfp418
GO:0110165	cellular anatomical entity	CC	18604	30	0.0179153	Gja5, Mrc2, Rpl10a, Sox12, Trp63, Ing4, Fbxl8, Tmod4, Wwc2, Septin1, Mplkip, Med18, Zcchc3, Atp5g2, Ndufb4, Dennd2d, Bcl9, Pus7l, Ppp1r3e, Vmac, Acot3, BC016579, Gpbar1, Zfp418, Palb2, Parp3, Lrrc3, Vash1, Vsig8, Gdpgp1
GO:0034641	cellular nitrogen compound metabolic process	BP	5741	13	0.0185893	Rpl10a, Sox12, Trp63, Ing4, Wwc2, Med18, Atp5g2, Bcl9, Pus7l, Acot3, Zfp418, Palb2, Parp3
GO:0019827	stem cell population maintenance	BP	169	2	0.0189184	Trp63, Bcl9
GO:0035107	appendage morphogenesis	BP	171	2	0.0193399	Gja5, Trp63
GO:0035108	limb morphogenesis	BP	171	2	0.0193399	Gja5, Trp63
GO:0098727	maintenance of cell number	BP	173	2	0.0197655	Trp63, Bcl9
GO:0140110	transcription regulator activity	MF	1744	6	0.0201388	Sox12, Trp63, Ing4, Med18, Bcl9, Zfp418
GO:0007051	spindle organization	BP	179	2	0.0210656	Septin1, Parp3
GO:0090304	nucleic acid metabolic process	BP	4605	11	0.0221643	Rpl10a, Sox12, Trp63, Ing4, Wwc2, Med18, Bcl9, Pus7l, Zfp418, Palb2, Parp3
GO:0055002	striated muscle cell development	BP	189	2	0.0233098	Tmod4, Zfp418
GO:0071407	cellular response to organic cyclic compound	BP	494	3	0.0235949	Trp63, Zcchc3, Gpbar1
GO:0008152	metabolic process	BP	10809	20	0.0236029	Mrc2, Rpl10a, Sox12, Trp63, Ing4, Fbxl8, Wwc2, Med18, Zcchc3, Atp5g2, Bcl9, Pus7l, Ppp1r3e, Acot3, Gpbar1, Zfp418, Palb2, Parp3, Vash1, Gdpgp1
GO:0048568	embryonic organ development	BP	503	3	0.0247211	Gja5, Palb2, Vash1
GO:0048736	appendage development	BP	196	2	0.0249369	Gja5, Trp63
GO:0060173	limb development	BP	196	2	0.0249369	Gja5, Trp63
GO:1902494	catalytic complex	CC	1352	5	0.0256286	Ing4, Fbxl8, Med18, Ndufb4, Ppp1r3e
GO:0005085	guanyl-nucleotide exchange factor activity	MF	199	2	0.0256481	Dennd2d, Gdpgp1
GO:0045216	cell-cell junction organization	BP	202	2	0.0263676	Gja5, Gpbar1
GO:0006006	glucose metabolic process	BP	202	2	0.0263676	Ppp1r3e, Gdpgp1
GO:0055001	muscle cell development	BP	204	2	0.0268518	Tmod4, Zfp418
GO:0035265	organ growth	BP	205	2	0.0270953	Wwc2, Zfp418
GO:0030522	intracellular receptor signaling pathway	BP	207	2	0.0275849	Trp63, Zcchc3
GO:0050679	positive regulation of epithelial cell proliferation	BP	207	2	0.0275849	Trp63, Gpbar1
GO:0044238	primary metabolic process	BP	9560	18	0.0294931	Rpl10a, Sox12, Trp63, Ing4, Fbxl8, Wwc2, Med18, Atp5g2, Bcl9, Pus7l, Ppp1r3e, Acot3, Gpbar1, Zfp418, Palb2, Parp3, Vash1, Gdpgp1
GO:0071704	organic substance metabolic process	BP	10294	19	0.0296182	Rpl10a, Sox12, Trp63, Ing4, Fbxl8, Wwc2, Med18, Zcchc3, Atp5g2, Bcl9, Pus7l, Ppp1r3e, Acot3, Gpbar1, Zfp418, Palb2, Parp3, Vash1, Gdpgp1
GO:0008150	biological_process	BP	20950	32	0.0298586	Gja5, Mrc2, Rpl10a, Sox12, Trp63, Ing4, Fbxl8, Tmod4, Wwc2, Septin1, Mplkip, Ccer1, Med18, Zcchc3, Atp5g2, Bcl9, Pus7l, AI115009, Ppp1r3e, Vmac, Acot3, BC016579, Gpbar1, Zfp418, Palb2, Parp3, Vash1, Vsig8, Gdpgp1, Gm5106, Scarna13, Gm10814
GO:2000112	regulation of cellular macromolecule biosynthetic process	BP	3598	9	0.0303383	Sox12, Trp63, Ing4, Wwc2, Med18, Bcl9, Ppp1r3e, Zfp418, Parp3
GO:0034654	nucleobase-containing compound biosynthetic process	BP	3611	9	0.0309683	Sox12, Trp63, Ing4, Wwc2, Med18, Atp5g2, Bcl9, Zfp418, Parp3
GO:0007568	aging	BP	222	2	0.0313702	Trp63, Vash1
GO:0010556	regulation of macromolecule biosynthetic process	BP	3646	9	0.032711	Sox12, Trp63, Ing4, Wwc2, Med18, Bcl9, Ppp1r3e, Zfp418, Parp3
GO:0044271	cellular nitrogen compound biosynthetic process	BP	4272	10	0.033541	Rpl10a, Sox12, Trp63, Ing4, Wwc2, Med18, Atp5g2, Bcl9, Zfp418, Parp3
GO:0019318	hexose metabolic process	BP	231	2	0.0337347	Ppp1r3e, Gdpgp1
GO:0018130	heterocycle biosynthetic process	BP	3676	9	0.0342596	Sox12, Trp63, Ing4, Wwc2, Med18, Atp5g2, Bcl9, Zfp418, Parp3
GO:0006302	double-strand break repair	BP	234	2	0.034538	Palb2, Parp3
GO:0019438	aromatic compound biosynthetic process	BP	3689	9	0.0349466	Sox12, Trp63, Ing4, Wwc2, Med18, Atp5g2, Bcl9, Zfp418, Parp3
GO:0051301	cell division	BP	587	3	0.0366207	Trp63, Septin1, Mplkip
GO:0090257	regulation of muscle system process	BP	244	2	0.0372695	Gja5, Zfp418
GO:0034645	cellular macromolecule biosynthetic process	BP	4355	10	0.0376849	Rpl10a, Sox12, Trp63, Ing4, Wwc2, Med18, Bcl9, Ppp1r3e, Zfp418, Parp3
GO:0009059	macromolecule biosynthetic process	BP	4410	10	0.0406254	Rpl10a, Sox12, Trp63, Ing4, Wwc2, Med18, Bcl9, Ppp1r3e, Zfp418, Parp3
GO:0048738	cardiac muscle tissue development	BP	257	2	0.0409408	Gja5, Zfp418
GO:0031326	regulation of cellular biosynthetic process	BP	3799	9	0.0411549	Sox12, Trp63, Ing4, Wwc2, Med18, Bcl9, Ppp1r3e, Zfp418, Parp3
GO:0005996	monosaccharide metabolic process	BP	260	2	0.0418068	Ppp1r3e, Gdpgp1
GO:1901362	organic cyclic compound biosynthetic process	BP	3818	9	0.0423004	Sox12, Trp63, Ing4, Wwc2, Med18, Atp5g2, Bcl9, Zfp418, Parp3
GO:0098798	mitochondrial protein complex	CC	263	2	0.0426798	Atp5g2, Ndufb4
GO:0043229	intracellular organelle	CC	12185	21	0.0427368	Rpl10a, Sox12, Trp63, Ing4, Fbxl8, Tmod4, Septin1, Mplkip, Med18, Atp5g2, Ndufb4, Dennd2d, Bcl9, Pus7l, Vmac, Acot3, BC016579, Zfp418, Palb2, Parp3, Vash1
GO:0016757	transferase activity, transferring glycosyl groups	MF	268	2	0.04415	Parp3, Gdpgp1
GO:0030246	carbohydrate binding	MF	272	2	0.0453397	Mrc2, Ppp1r3e
GO:0009889	regulation of biosynthetic process	BP	3877	9	0.0459989	Sox12, Trp63, Ing4, Wwc2, Med18, Bcl9, Ppp1r3e, Zfp418, Parp3
GO:0000151	ubiquitin ligase complex	CC	282	2	0.0483658	Fbxl8, Med18
GO:0006310	DNA recombination	BP	285	2	0.0492878	Palb2, Parp3
GO:0060090	molecular adaptor activity	MF	285	2	0.0492878	Wwc2, Septin1

## Sheet: NK1t vs. NS1t, KEGG-up
ID	Pathway	N	Up	P.Up	Genes.Up
path:mmu04068	FoxO signaling pathway	131	11	5.61725e-10	Bcl2l11, Cdkn1a, Cdkn1b, Plk3, Foxg1, Gadd45b, Sgk1, Plk2, Gadd45g, Homer1, Irs2
path:mmu05210	Colorectal cancer	88	9	3.73183e-09	Areg, Bcl2l11, Casp3, Cdkn1a, Fos, Jun, Gadd45b, Gadd45g, Pmaip1
path:mmu04010	MAPK signaling pathway	294	13	3.7396e-08	Areg, Bdnf, Casp3, Fos, Nr4a1, Jun, Jund, Gadd45b, Dusp1, Gadd45g, Dusp5, Dusp4, Dusp6
path:mmu04210	Apoptosis	136	7	2.15114e-05	Bcl2l11, Casp3, Fos, Jun, Gadd45b, Gadd45g, Pmaip1
path:mmu04657	IL-17 signaling pathway	93	6	2.37018e-05	Casp3, Fos, Fosb, Jun, Jund, Ptgs2
path:mmu05222	Small cell lung cancer	93	6	2.37018e-05	Casp3, Cdkn1a, Cdkn1b, Gadd45b, Ptgs2, Gadd45g
path:mmu05202	Transcriptional misregulation in cancer	209	8	4.67757e-05	Cdkn1a, Cdkn1b, Gadd45b, Nr4a3, Gadd45g, H3c7, H3c6, Dusp6
path:mmu05161	Hepatitis B	162	7	6.57227e-05	Casp3, Cdkn1a, Egr2, Egr3, Fos, Jun, Pcna
path:mmu05169	Epstein-Barr virus infection	223	8	7.37155e-05	Bcl2l11, Casp3, Cdkn1a, Cdkn1b, Jun, Gadd45b, Gadd45g, Sap30
path:mmu04115	p53 signaling pathway	72	5	8.14764e-05	Casp3, Cdkn1a, Gadd45b, Gadd45g, Pmaip1
path:mmu05206	MicroRNAs in cancer	236	8	0.000109216	Bcl2l11, Casp3, Cdkn1a, Cdkn1b, Ptgs2, Spry2, Irs2, Rassf1
path:mmu04380	Osteoclast differentiation	124	6	0.000118742	Fos, Fosb, Fosl2, Jun, Junb, Jund
path:mmu04921	Oxytocin signaling pathway	153	6	0.000370737	Cdkn1a, Fos, Jun, Kcnj2, Ptgs2, Rgs2
path:mmu04390	Hippo signaling pathway	157	6	0.000425302	Areg, Smad7, Yap1, Frmd6, Rassf1, Pard6a
path:mmu05203	Viral carcinogenesis	220	7	0.000431061	Casp3, Cdkn1a, Cdkn1b, Egr2, Egr3, Jun, Pmaip1
path:mmu05200	Pathways in cancer	541	11	0.000535094	Bcl2l11, Casp3, Cdkn1a, Cdkn1b, Fos, Jun, Gadd45b, Ptgs2, Gadd45g, Rassf1, Pmaip1
path:mmu04928	Parathyroid hormone synthesis, secretion and action	108	5	0.00054366	Cdkn1a, Egr1, Fos, Jund, Nr4a2
path:mmu04392	Hippo signaling pathway - multiple species	27	3	0.000591019	Yap1, Frmd6, Rassf1
path:mmu04625	C-type lectin receptor signaling pathway	112	5	0.000641569	Plk3, Egr2, Egr3, Jun, Ptgs2
path:mmu04668	TNF signaling pathway	113	5	0.000667983	Casp3, Fos, Jun, Junb, Ptgs2
path:mmu05031	Amphetamine addiction	69	4	0.000859163	Arc, Fos, Fosb, Jun
path:mmu04215	Apoptosis - multiple species	32	3	0.000979948	Bcl2l11, Casp3, Pmaip1
path:mmu05223	Non-small cell lung cancer	72	4	0.00100799	Cdkn1a, Gadd45b, Gadd45g, Rassf1
path:mmu04110	Cell cycle	125	5	0.00105231	Cdkn1a, Cdkn1b, Gadd45b, Pcna, Gadd45g
path:mmu05220	Chronic myeloid leukemia	76	4	0.00123342	Cdkn1a, Cdkn1b, Gadd45b, Gadd45g
path:mmu05216	Thyroid cancer	37	3	0.00150107	Cdkn1a, Gadd45b, Gadd45g
path:mmu04151	PI3K-Akt signaling pathway	358	8	0.0017019	Areg, Bdnf, Bcl2l11, Cdkn1a, Cdkn1b, Nr4a1, Rheb, Sgk1
path:mmu04012	ErbB signaling pathway	84	4	0.00178601	Areg, Cdkn1a, Cdkn1b, Jun
path:mmu05224	Breast cancer	147	5	0.00215149	Cdkn1a, Fos, Jun, Gadd45b, Gadd45g
path:mmu05167	Kaposi sarcoma-associated herpesvirus infection	216	6	0.00220415	Casp3, Cdkn1a, Fos, Jun, Ptgs2, Ubc
path:mmu01522	Endocrine resistance	93	4	0.00259002	Cdkn1a, Cdkn1b, Fos, Jun
path:mmu04932	Non-alcoholic fatty liver disease	155	5	0.00270644	Bcl2l11, Casp3, Fos, Jun, Irs2
path:mmu05030	Cocaine addiction	48	3	0.00318088	Bdnf, Fosb, Jun
path:mmu04933	AGE-RAGE signaling pathway in diabetic complications	101	4	0.00348765	Casp3, Cdkn1b, Egr1, Jun
path:mmu05213	Endometrial cancer	58	3	0.00542709	Cdkn1a, Gadd45b, Gadd45g
path:mmu04935	Growth hormone synthesis, secretion and action	116	4	0.0056992	Fos, Junb, Ghsr, Irs2
path:mmu05217	Basal cell carcinoma	63	3	0.00683081	Cdkn1a, Gadd45b, Gadd45g
path:mmu04137	Mitophagy - animal	68	3	0.00843115	Jun, Cited2, Ubc
path:mmu05140	Leishmaniasis	70	3	0.00912765	Fos, Jun, Ptgs2
path:mmu05218	Melanoma	72	3	0.00985684	Cdkn1a, Gadd45b, Gadd45g
path:mmu05214	Glioma	74	3	0.010619	Cdkn1a, Gadd45b, Gadd45g
path:mmu05212	Pancreatic cancer	76	3	0.0114144	Cdkn1a, Gadd45b, Gadd45g
path:mmu05133	Pertussis	77	3	0.0118247	Casp3, Fos, Jun
path:mmu05162	Measles	145	4	0.0122742	Casp3, Cdkn1b, Fos, Jun
path:mmu01524	Platinum drug resistance	80	3	0.0131059	Casp3, Cdkn1a, Pmaip1
path:mmu05226	Gastric cancer	148	4	0.0131477	Cdkn1a, Cdkn1b, Gadd45b, Gadd45g
path:mmu03018	RNA degradation	81	3	0.0135499	Btg1, Btg2, Tob2
path:mmu05166	Human T-cell leukemia virus 1 infection	243	5	0.0171307	Cdkn1a, Egr1, Egr2, Fos, Jun
path:mmu05171	Coronavirus disease - COVID-19	245	5	0.0176823	Fos, Jun, Rpl21, Rpl9, Rpl22l1
path:mmu04934	Cushing syndrome	162	4	0.0177442	Cdkn1a, Cdkn1b, Nr4a1, Rasd1
path:mmu05165	Human papillomavirus infection	354	6	0.0221583	Casp3, Cdkn1a, Cdkn1b, Ptgs2, Rheb, Pard6a
path:mmu05231	Choline metabolism in cancer	98	3	0.0224096	Fos, Jun, Rheb
path:mmu04713	Circadian entrainment	98	3	0.0224096	Fos, Per1, Rasd1
path:mmu04218	Cellular senescence	177	4	0.0236588	Cdkn1a, Gadd45b, Rheb, Gadd45g
path:mmu04064	NF-kappa B signaling pathway	101	3	0.0242321	Gadd45b, Ptgs2, Gadd45g
path:mmu05219	Bladder cancer	41	2	0.0260962	Cdkn1a, Rassf1
path:mmu05022	Pathways of neurodegeneration - multiple diseases	470	7	0.0261094	Bdnf, Casp3, Nefl, Ptgs2, Ubc, Atp5d, C9orf72
path:mmu05034	Alcoholism	185	4	0.0272473	Bdnf, Fosb, H3c7, H3c6
path:mmu00860	Porphyrin metabolism	42	2	0.0272926	Eprs, Blvrb
path:mmu03013	Nucleocytoplasmic transport	116	3	0.0345088	Sap18b, Ranbp2, Sap18
path:mmu04978	Mineral absorption	54	2	0.0432599	Fth1, Mt1
path:mmu04923	Regulation of lipolysis in adipocytes	56	2	0.0461898	Ptgs2, Irs2
path:mmu04024	cAMP signaling pathway	220	4	0.0466089	Bdnf, Fos, Jun, Ghsr
path:mmu04726	Serotonergic synapse	131	3	0.0466927	Casp3, Ptgs2, Dusp1
path:mmu04915	Estrogen signaling pathway	134	3	0.0493522	Fos, Jun, Krt16

## Sheet: NK1t vs. NS1t, KEGG-down
ID	Pathway	N	Down	P.Down	Genes.Down
path:mmu00190	Oxidative phosphorylation	134	2	0.0122044	Atp5g2, Ndufb4
path:mmu05415	Diabetic cardiomyopathy	206	2	0.0273397	Atp5g2, Ndufb4
path:mmu05208	Chemical carcinogenesis - reactive oxygen species	221	2	0.0311117
path:mmu04714	Thermogenesis	229	2	0.0332033	Atp5g2, Ndufb4
path:mmu05012	Parkinson disease	263	2	0.0426798	Atp5g2, Ndufb4
path:mmu05020	Prion disease	267	2	0.0438545	Atp5g2, Ndufb4

## Sheet: GK1t vs. GS1t, Top-up
GeneID	Symbol	Entrez	baseMean	log2FC	lfcSE	stat	pvalue	padj	fixedPval	fixedFDR
ENSMUSG00000020423.6	Btg2	12227	1424.1	1.28738	0.197686	6.51225	7.40344e-11	2.65665e-07	2.22045e-16	4.97991e-13
ENSMUSG00000026826.13	Nr4a2	18227	366.708	2.3994	0.335544	7.15077	8.62944e-13	7.74147e-09	2.22045e-16	4.97991e-13
ENSMUSG00000029135.10	Fosl2	14284	280.678	1.39359	0.235411	5.91982	3.22284e-09	8.26061e-06	2.22045e-16	4.97991e-13
ENSMUSG00000005699.16	Pard6a	56513	277.527	1.25618	0.191913	6.54556	5.92722e-11	2.65665e-07	2.22045e-16	4.97991e-13
ENSMUSG00000062867.13	Impdh2	23918	437.295	1.30101	0.204548	6.36039	2.01247e-10	6.01795e-07	2.22045e-16	4.97991e-13
ENSMUSG00000023034.7	Nr4a1	15370	1812.06	1.95922	0.256222	7.64656	2.0642e-14	3.70359e-10	2.22045e-16	4.97991e-13
ENSMUSG00000024042.7	Sik1	17691	442.985	1.4031	0.21479	6.53241	6.47188e-11	2.65665e-07	2.22045e-16	4.97991e-13
ENSMUSG00000045903.9	Npas4	225872	267.221	3.38654	0.60258	5.62007	1.90884e-08	4.28106e-05	2.22045e-16	4.97991e-13
ENSMUSG00000018541.10	Cwc25	67480	666.745	0.984783	0.181972	5.41171	6.24241e-08	0.000124446	2.88658e-15	5.75456e-12
ENSMUSG00000035329.7	Fbxo33	70611	871.5	0.831624	0.163991	5.07117	3.95384e-07	0.000709399	1.38112e-13	2.478e-10
ENSMUSG00000071341.4	Egr4	13656	366.974	2.35667	0.482011	4.88926	1.01217e-06	0.00139696	9.83658e-13	1.3576e-09
ENSMUSG00000091956.2	C2cd4b	75697	50.9405	3.12699	0.638979	4.89373	9.89443e-07	0.00139696	9.37916e-13	1.3576e-09
ENSMUSG00000028341.9	Nr4a3	18124	169.003	2.22946	0.494485	4.50865	6.52401e-06	0.00836099	4.783e-11	6.12975e-08
ENSMUSG00000077167.1	Gm24119	115487534	47.6719	1.97395	0.446097	4.42495	9.64651e-06	0.0115385	1.07917e-10	1.29083e-07
ENSMUSG00000015605.6	Srf	20807	594.964	0.887286	0.202653	4.37836	1.19574e-05	0.0134087	1.68662e-10	1.89134e-07
ENSMUSG00000025981.13	Coq10b	67876	347.291	0.881385	0.203948	4.32161	1.54896e-05	0.016348	2.88823e-10	3.04827e-07
ENSMUSG00000021453.2	Gadd45g	23882	722.693	1.55142	0.361283	4.29419	1.75329e-05	0.0174764	3.73616e-10	3.72412e-07
ENSMUSG00000060126.14	Tpt1	22070	291.741	0.866402	0.210326	4.11933	3.79971e-05	0.0340872	1.86016e-09	1.66875e-06
ENSMUSG00000052837.7	Junb	16477	3007.09	1.46022	0.365238	3.99799	6.38824e-05	0.0545799	5.45873e-09	4.66384e-06
ENSMUSG00000064326.13	Siva1	30954	281.138	0.802504	0.205256	3.90978	9.23819e-05	0.0690632	1.17129e-08	8.75638e-06
ENSMUSG00000042816.4	Gpr151	240239	54.5206	4.02778	1.02888	3.91471	9.05114e-05	0.0690632	1.12276e-08	8.75638e-06
ENSMUSG00000003545.3	Fosb	14282	129.882	2.74304	0.71712	3.82508	0.000130731	0.0938229	2.40118e-08	1.72328e-05
ENSMUSG00000021250.13	Fos	14281	1408.91	1.79092	0.470942	3.80285	0.000143042	0.0971731	2.89187e-08	1.99561e-05
ENSMUSG00000075232.6	Amd1	11702	830.016	0.534095	0.140706	3.79582	0.000147154	0.0971731	3.06622e-08	2.03756e-05
ENSMUSG00000026615.14	Eprs	107508	3104.8	0.443798	0.117148	3.78836	0.000151647	0.0971731	3.26275e-08	2.09072e-05
ENSMUSG00000029860.16	Zyx	22793	2348.39	0.912629	0.242154	3.7688	0.000164032	0.101485	3.83701e-08	2.37392e-05
ENSMUSG00000032487.8	Ptgs2	19225	245.776	1.60708	0.442362	3.63296	0.000280187	0.16757	1.15791e-07	6.9251e-05
ENSMUSG00000040511.14	Pvr	52118	566.452	0.662237	0.184187	3.59546	0.000323825	0.187421	1.56028e-07	9.03048e-05
ENSMUSG00000029062.14	Cdk11b	12537	3342.94	0.4683	0.132249	3.54103	0.000398562	0.223469	2.39276e-07	0.000134159
ENSMUSG00000049866.12	Arl4c	320982	194.736	0.659519	0.188307	3.50235	0.000461167	0.250735	3.23051e-07	0.000175642
ENSMUSG00000031917.12	Nip7	66164	360.373	0.520418	0.15363	3.38748	0.000705384	0.372235	7.73694e-07	0.000408283
ENSMUSG00000090698.2	Apold1	381823	143.754	1.19913	0.360037	3.33058	0.000866645	0.420253	1.18048e-06	0.000572439
ENSMUSG00000066278.6	Vps37b	330192	438.843	0.612789	0.184424	3.32272	0.000891448	0.420904	1.25082e-06	0.000590583
ENSMUSG00000036160.13	Surf6	20935	361.831	0.495827	0.150235	3.30034	0.00096568	0.433156	1.47373e-06	0.000661043
ENSMUSG00000079470.8	Utp14b	195434	463.301	0.773508	0.236016	3.27735	0.00104788	0.450515	1.74233e-06	0.000762463
ENSMUSG00000032010.15	Usp2	53376	1954.48	0.5146	0.157424	3.26889	0.00107971	0.450515	1.85251e-06	0.000772971
ENSMUSG00000037447.16	Arid5a	214855	1094.49	0.729018	0.224719	3.24413	0.00117812	0.465577	2.21491e-06	0.00088311
ENSMUSG00000059479.7	B3gnt8	232984	68.5362	0.75081	0.23289	3.22389	0.00126463	0.482765	2.56075e-06	0.000977552
ENSMUSG00000034640.9	Tiparp	99929	1250.44	0.700452	0.218405	3.20713	0.00134066	0.499135	2.8858e-06	0.00107869
ENSMUSG00000002797.9	Ggct	110175	438.432	0.561178	0.175583	3.19607	0.00139311	0.499135	3.12154e-06	0.00112013
ENSMUSG00000024232.2	Bambi	68010	218.765	0.987521	0.310035	3.18519	0.00144661	0.499135	3.3717e-06	0.00116337
ENSMUSG00000042729.11	Wdr74	107071	663.215	0.474307	0.148884	3.18576	0.00144377	0.499135	3.35817e-06	0.00116337
ENSMUSG00000071041.4	Impdh2-ps	100042069	480.337	0.547557	0.172802	3.16869	0.00153127	0.508743	3.78764e-06	0.00125848
ENSMUSG00000021701.8	Plk2	20620	1552.56	1.02985	0.325006	3.1687	0.00153121	0.508743	3.78731e-06	0.00125848
ENSMUSG00000030533.16	Unc45a	101869	1853.63	0.484501	0.15316	3.16337	0.00155952	0.508743	3.93189e-06	0.00128266
ENSMUSG00000067279.3	Ppp1r3c	53412	497.341	1.06362	0.337671	3.14989	0.00163334	0.518014	4.3218e-06	0.00138148
ENSMUSG00000028214.13	Gem	14579	228.128	1.51808	0.485312	3.12806	0.00175966	0.544343	5.03253e-06	0.00155679
ENSMUSG00000101122.1	Gm17971	100416214	154.471	1.02787	0.332159	3.09453	0.00197126	0.589472	6.34621e-06	0.00189773
ENSMUSG00000070284.10	Gmppb	331026	243.592	0.788255	0.255418	3.08613	0.00202777	0.596431	6.72322e-06	0.00197751
ENSMUSG00000005374.13	Tbl2	27368	1027.01	0.323542	0.105738	3.05986	0.00221443	0.637905	8.0469e-06	0.00232867
ENSMUSG00000090516.1	Rps11-ps1	621119	88.9513	0.691565	0.233243	2.96499	0.00302691	0.787085	1.52161e-05	0.00395663
ENSMUSG00000038000.10	Acd	497652	898.245	0.732037	0.247756	2.95467	0.00313001	0.79415	1.62899e-05	0.00417533
ENSMUSG00000019297.9	Nop9	67842	692.708	0.528892	0.179301	2.94974	0.00318046	0.79415	1.68288e-05	0.00425271
ENSMUSG00000032119.5	Hinfp	102423	836.286	0.472337	0.16068	2.93961	0.00328628	0.79415	1.79881e-05	0.00447447
ENSMUSG00000027905.15	Ddx20	53975	521.349	0.440297	0.15209	2.89497	0.00379191	0.854569	2.40657e-05	0.00546565
ENSMUSG00000042487.6	Leo1	235497	491.835	0.646122	0.22337	2.89261	0.00382059	0.854569	2.44371e-05	0.00548062
ENSMUSG00000074580.11	4931440P22Rik	71004	186.089	0.759973	0.26354	2.88371	0.00393017	0.85994	2.58827e-05	0.00566327
ENSMUSG00000046727.13	Cystm1	66060	861.599	0.361893	0.125717	2.87863	0.00399409	0.863398	2.67454e-05	0.00578153
ENSMUSG00000037868.15	Egr2	13654	142.512	1.22685	0.429529	2.85628	0.00428642	0.908234	3.08722e-05	0.00656711
ENSMUSG00000047407.17	Tgif1	21815	299.486	0.624376	0.21869	2.85507	0.00430275	0.908234	3.11116e-05	0.00656711
ENSMUSG00000029817.11	Tra2a	101214	3971.76	0.566578	0.200418	2.82698	0.00469897	0.947292	3.7204e-05	0.00750017
ENSMUSG00000039221.10	Rpl22l1	68028	148.191	1.0183	0.362931	2.80576	0.00501976	0.999909	4.25382e-05	0.00848023
ENSMUSG00000101970.8	Chaserr	69170	1585.75	0.533806	0.190966	2.7953	0.00518522	0.999909	4.54301e-05	0.00895722
ENSMUSG00000081487.1	Gm13689	100416042	143.048	0.702998	0.252267	2.78672	0.00532445	0.999909	4.79376e-05	0.00934887
ENSMUSG00000032355.16	Mlip	69642	170.445	1.36213	0.489726	2.78141	0.00541238	0.999909	4.95561e-05	0.00945889
ENSMUSG00000036422.10	Pcdh8	18530	1099.94	1.15558	0.416082	2.77729	0.00548142	0.999909	5.08459e-05	0.00960292
ENSMUSG00000028195.4	Ccn1	16007	1870.15	0.742395	0.267943	2.77072	0.00559318	0.999909	5.29688e-05	0.0097976
ENSMUSG00000024218.13	Taf11	68776	891.275	0.270875	0.0977447	2.77125	0.00558416	0.999909	5.2796e-05	0.0097976
ENSMUSG00000092021.8	Gbp11	634650	293.768	0.621011	0.224511	2.76606	0.00567378	0.999909	5.45272e-05	0.00988209
ENSMUSG00000041841.8	Rpl37	67281	148.627	0.862982	0.311889	2.76696	0.00565825	0.999909	5.4225e-05	0.00988209
ENSMUSG00000010067.13	Rassf1	56289	579.076	0.558541	0.202372	2.75997	0.00578071	0.999909	5.66294e-05	0.0101604
ENSMUSG00000055148.7	Klf2	16598	97.656	0.912193	0.331196	2.75424	0.00588286	0.999909	5.8675e-05	0.0104232
ENSMUSG00000020910.16	Adprm	66358	353.729	0.378047	0.137435	2.75074	0.00594607	0.999909	5.99591e-05	0.0105258
ENSMUSG00000029736.15	Nobox	18291	31.372	4.49561	1.64041	2.74054	0.00613382	0.999909	6.38553e-05	0.0106783
ENSMUSG00000001156.9	Mxd1	17119	1323.29	0.473264	0.172411	2.74498	0.00605144	0.999909	6.21305e-05	0.0106783
ENSMUSG00000034931.15	Dhx8	217207	770.253	0.360389	0.131554	2.73947	0.00615378	0.999909	6.42768e-05	0.0106783
ENSMUSG00000029875.5	Ccdc184	239650	166.579	0.740094	0.269984	2.74126	0.00612049	0.999909	6.35746e-05	0.0106783
ENSMUSG00000049648.4	Olfr273	258821	61.5367	4.79354	1.76231	2.72003	0.0065275	0.999909	7.24247e-05	0.0118131
ENSMUSG00000065147.1	Snora31	100303751	54.7924	1.07615	0.397271	2.70885	0.00675171	0.999909	7.7547e-05	0.0124227
ENSMUSG00000031799.10	Tpm4	326618	930.208	0.519886	0.192876	2.69545	0.00702938	0.999909	8.41339e-05	0.0132415
ENSMUSG00000038418.7	Egr1	13653	2467.62	1.19497	0.444235	2.68995	0.00714618	0.999909	8.6985e-05	0.0135712
ENSMUSG00000067148.15	Polr1c	20016	486.86	0.511164	0.190962	2.67679	0.00743309	0.999909	9.41903e-05	0.0144426
ENSMUSG00000099714.1	Gm20587	100417924	33.4917	4.93881	1.85659	2.66015	0.00781068	0.999909	0.000104111	0.0156971
ENSMUSG00000023707.13	Ogfod2	66627	663.509	0.616116	0.232333	2.65187	0.00800484	0.999909	0.000109405	0.0161341
ENSMUSG00000040435.12	Ppp1r15a	17872	619.903	1.03773	0.391928	2.64775	0.00810288	0.999909	0.000112129	0.0163562
ENSMUSG00000029177.9	Cenpa	12615	285.923	0.740016	0.280084	2.64212	0.0082389	0.999909	0.000115963	0.0167791
ENSMUSG00000029454.15	Mapkapk5	17165	140.846	0.617571	0.235161	2.62616	0.00863545	0.999909	0.000127507	0.0183019
ENSMUSG00000118376.1	Gm9926	100503565	54.6787	3.98439	1.52984	2.60444	0.00920234	0.999909	0.000144962	0.0201621
ENSMUSG00000048482.14	Bdnf	12064	310.575	0.994115	0.381943	2.60278	0.00924703	0.999909	0.000146386	0.0201984
ENSMUSG00000024891.6	Slc29a2	13340	289.525	0.562864	0.216732	2.59705	0.00940288	0.999909	0.000151404	0.0204248
ENSMUSG00000026360.9	Rgs2	19735	688.103	0.58093	0.225537	2.57576	0.010002	0.999909	0.000171485	0.022961
ENSMUSG00000026238.14	Ptma	19231	1977.39	0.515884	0.200453	2.5736	0.0100648	0.999909	0.000173659	0.02308
ENSMUSG00000039183.6	Nubp2	26426	876.42	0.537222	0.21085	2.54789	0.0108377	0.999909	0.000201571	0.0262072
ENSMUSG00000028670.14	Lypla2	26394	1896.62	0.44596	0.175331	2.54353	0.010974	0.999909	0.00020671	0.0266819
ENSMUSG00000022096.14	Hr	15460	1437.69	0.562335	0.221247	2.54166	0.0110326	0.999909	0.000208938	0.0267769
ENSMUSG00000049516.9	Spty2d1	101685	819.528	0.339012	0.133452	2.54032	0.0110752	0.999909	0.000210564	0.0267939
ENSMUSG00000043866.11	Taf10	24075	326.263	0.508468	0.200805	2.53215	0.0113365	0.999909	0.000220685	0.027884
ENSMUSG00000034300.17	Fam53c	66306	1406.62	0.469297	0.185599	2.52856	0.0114532	0.999909	0.00022528	0.0280037
ENSMUSG00000006335.16	Tfpt	69714	472.554	0.51784	0.205457	2.52043	0.011721	0.999909	0.000236008	0.0290031
ENSMUSG00000025733.17	Rhot2	214952	450.364	0.639027	0.25495	2.50647	0.0121942	0.999909	0.000255564	0.0310485
ENSMUSG00000032905.5	Atg12	67526	1076.45	0.350471	0.139905	2.50506	0.012243	0.999909	0.000257625	0.0310485
ENSMUSG00000037761.16	Actr5	109275	1107.1	0.347607	0.139504	2.49174	0.012712	0.999909	0.00027785	0.0325052
ENSMUSG00000008384.8	Sertad1	55942	158.211	0.682122	0.273926	2.49016	0.0127684	0.999909	0.000280335	0.0325052
ENSMUSG00000062647.16	Rpl7a	27176	123.456	0.629927	0.253684	2.48311	0.0130241	0.999909	0.00029173	0.0330178
ENSMUSG00000071528.4	Atp5md	66477	233.024	0.680484	0.274103	2.48258	0.0130434	0.999909	0.0002926	0.0330178
ENSMUSG00000049504.12	Proser1	212127	1144.93	0.40125	0.162022	2.47651	0.0132673	0.999909	0.00030278	0.0337421
ENSMUSG00000113053.1	Gm18262	100416801	31.5675	4.27256	1.73248	2.46615	0.0136574	0.999909	0.000320931	0.035394
ENSMUSG00000040688.16	Tbl3	213773	1127.29	0.429772	0.174419	2.46402	0.013739	0.999909	0.000324792	0.035533
ENSMUSG00000061787.15	Rps17	20068	133.137	0.689989	0.2802	2.46249	0.0137978	0.999909	0.000327589	0.0356218
ENSMUSG00000041037.8	Irgq	210146	625.705	0.457722	0.187675	2.4389	0.0147319	0.999909	0.000373629	0.0394332
ENSMUSG00000044533.15	Rps2	16898	394.519	0.535953	0.219665	2.43986	0.0146929	0.999909	0.000371646	0.0394332
ENSMUSG00000068697.7	Myoz1	59011	37.3493	4.22323	1.7362	2.43246	0.0149967	0.999909	0.000387226	0.0406292
ENSMUSG00000023286.16	Ube2j2	140499	809.13	0.41275	0.170939	2.4146	0.0157524	0.999909	0.000427353	0.0435657
ENSMUSG00000030847.8	Bag3	29810	357.432	0.557013	0.230677	2.41469	0.0157486	0.999909	0.000427144	0.0435657
ENSMUSG00000022176.11	Rem2	140743	110.011	1.00242	0.416599	2.4062	0.0161195	0.999909	0.000447553	0.0453672
ENSMUSG00000027797.15	Dclk1	13175	4688.72	0.48673	0.202584	2.40261	0.0162787	0.999909	0.000456455	0.045992
ENSMUSG00000073758.10	Sh3d21	66938	88.7907	0.983382	0.409634	2.40064	0.0163666	0.999909	0.000461407	0.045992
ENSMUSG00000021868.7	Ppif	105675	410.804	0.628712	0.26257	2.39445	0.0166451	0.999909	0.000477275	0.0470059
ENSMUSG00000057666.18	Gapdh	14433	727.047	0.51297	0.215073	2.3851	0.0170746	0.999909	0.000502264	0.0487115
ENSMUSG00000037408.10	Cnnm4	94220	373.376	0.37219	0.156626	2.3763	0.0174872	0.999909	0.000526867	0.0492592
ENSMUSG00000074088.6	Snrnp40	66585	839.352	0.307638	0.129297	2.37931	0.017345	0.999909	0.000518319	0.0492592
ENSMUSG00000038917.4	3930402G23Rik	665306	61.3048	2.68067	1.12739	2.37776	0.0174184	0.999909	0.000522719	0.0492592
ENSMUSG00000018736.14	Ndel1	83431	1756.47	0.356223	0.149912	2.37621	0.0174916	0.999909	0.00052713	0.0492592
ENSMUSG00000022841.15	Ap2m1	11773	1770.22	0.352731	0.14842	2.37658	0.0174739	0.999909	0.000526062	0.0492592

## Sheet: GK1t vs. GS1t, Top-down
GeneID	Symbol	Entrez	baseMean	log2FC	lfcSE	stat	pvalue	padj	fixedPval	fixedFDR
ENSMUSG00000021799.9	Opn4	30044	187.631	-1.75997	0.349376	-5.03746	4.71762e-07	0.000769487	1.99618e-13	3.25595e-10
ENSMUSG00000046168.9	Kcnrg	328424	122.864	-1.34741	0.319704	-4.21455	2.50274e-05	0.0236337	7.82274e-10	7.38714e-07
ENSMUSG00000030880.14	Polr3e	26939	4834.78	-1.2753	0.320681	-3.97686	6.983e-05	0.0569495	6.56355e-09	5.35287e-06
ENSMUSG00000027896.15	Slc16a4	229699	145.482	-0.918959	0.272809	-3.36851	0.000755769	0.387429	8.91409e-07	0.000456962
ENSMUSG00000044499.11	Hs3st5	319415	130.241	-0.692919	0.207402	-3.34094	0.000834949	0.41613	1.09362e-06	0.00054505
ENSMUSG00000024401.14	Tnf	21926	150.27	-2.23044	0.673014	-3.31411	0.000919369	0.422957	1.33248e-06	0.000613007
ENSMUSG00000070997.4	1700055D18Rik	73405	65.3742	-1.00317	0.306561	-3.27234	0.00106662	0.450515	1.8068e-06	0.000771849
ENSMUSG00000030469.10	Zfp719	210105	751.332	-0.508844	0.15659	-3.24952	0.00115598	0.465577	2.13052e-06	0.000868769
ENSMUSG00000117437.1	Gm33727	102636737	245.516	-0.905536	0.279453	-3.24039	0.00119366	0.465577	2.27514e-06	0.000887405
ENSMUSG00000073591.4	Pcdhb22	93893	252.991	-2.1926	0.685762	-3.19732	0.0013871	0.499135	3.09405e-06	0.00112013
ENSMUSG00000097055.2	Gm4419	100043407	235.372	-1.07414	0.341247	-3.14769	0.00164568	0.518014	4.38882e-06	0.00138148
ENSMUSG00000027654.2	Fam83d	71878	396.913	-1.0586	0.340872	-3.10558	0.00189906	0.577509	5.88064e-06	0.00178831
ENSMUSG00000001247.16	Lsr	54135	85.2073	-1.1496	0.376126	-3.05643	0.00223988	0.637905	8.23677e-06	0.00234578
ENSMUSG00000049657.9	Zbtb5	230119	934.014	-0.309261	0.101701	-3.04087	0.00235893	0.661311	9.15445e-06	0.00256639
ENSMUSG00000094091.3	Gm21885	102639132	84.7912	-1.0779	0.355099	-3.03551	0.00240131	0.662835	9.49301e-06	0.00262036
ENSMUSG00000042498.16	Radx	102871	34.5922	-1.84842	0.614736	-3.00686	0.00263965	0.717585	1.15131e-05	0.00312981
ENSMUSG00000022100.14	Xpo7	65246	1931.1	-0.26407	0.0879739	-3.00169	0.00268486	0.718981	1.19185e-05	0.00319166
ENSMUSG00000069184.4	Zfp72	238722	183.024	-0.724081	0.243491	-2.97375	0.00294183	0.77621	1.43578e-05	0.00378836
ENSMUSG00000069307.7	H2bc23	665596	101.996	-1.33531	0.454529	-2.93778	0.00330571	0.79415	1.82051e-05	0.00447447
ENSMUSG00000026637.13	Traf5	22033	256.308	-0.589989	0.201204	-2.93228	0.00336479	0.79415	1.88733e-05	0.00451386
ENSMUSG00000032691.14	Nlrp3	216799	329.939	-0.826832	0.28225	-2.92943	0.00339586	0.79415	1.92295e-05	0.00451386
ENSMUSG00000021589.13	Rhobtb3	73296	1537.64	-0.403835	0.137907	-2.9283	0.00340818	0.79415	1.93717e-05	0.00451386
ENSMUSG00000057409.7	Zfp53	24132	412.293	-0.458626	0.156518	-2.93018	0.0033877	0.79415	1.91356e-05	0.00451386
ENSMUSG00000104093.1	A330015K06Rik	102637797	1337.36	-0.823931	0.283452	-2.90678	0.00365175	0.839996	2.22916e-05	0.00512764
ENSMUSG00000063234.5	Gpr84	80910	174.845	-1.19425	0.413302	-2.88955	0.00385799	0.854569	2.49258e-05	0.00552123
ENSMUSG00000063804.8	Lin28b	380669	61.9922	-2.25975	0.796944	-2.83552	0.00457515	0.943533	3.52412e-05	0.00726779
ENSMUSG00000022292.16	Rrm2b	382985	377.607	-0.426109	0.150242	-2.83615	0.0045661	0.943533	3.50999e-05	0.00726779
ENSMUSG00000027857.10	Tshb	22094	334.124	-0.819807	0.289983	-2.82709	0.00469735	0.947292	3.7178e-05	0.00750017
ENSMUSG00000048174.2	Tmem81	74626	361.875	-0.753224	0.270686	-2.78265	0.00539176	0.999909	4.91742e-05	0.00945889
ENSMUSG00000029026.17	Trp73	22062	1096.77	-0.343648	0.124986	-2.74949	0.00596886	0.999909	6.04255e-05	0.0105258
ENSMUSG00000038507.6	Parp12	243771	697.101	-0.322118	0.117537	-2.74057	0.00613335	0.999909	6.38453e-05	0.0106783
ENSMUSG00000046408.15	1700067K01Rik	73453	171.884	-0.677895	0.248773	-2.72495	0.00643103	0.999909	7.02748e-05	0.0115676
ENSMUSG00000045658.16	Pid1	98496	1410.65	-0.290443	0.106995	-2.71455	0.00663661	0.999909	7.48956e-05	0.0121061
ENSMUSG00000110424.1	1700012D14Rik	75479	554.473	-0.521409	0.192889	-2.70316	0.00686835	0.999909	8.02812e-05	0.0127469
ENSMUSG00000031202.5	Rab39b	67790	447.983	-0.504823	0.188465	-2.6786	0.00739307	0.999909	9.31682e-05	0.0144106
ENSMUSG00000113244.1	Gm31218	102633383	30.2509	-4.2553	1.59053	-2.6754	0.00746405	0.999909	9.49851e-05	0.0144426
ENSMUSG00000078851.4	H2aw	319162	697.554	-0.583235	0.219972	-2.65141	0.00801575	0.999909	0.000109707	0.0161341
ENSMUSG00000025013.15	Tll2	24087	370.143	-0.724404	0.27306	-2.65291	0.00798017	0.999909	0.000108725	0.0161341
ENSMUSG00000043190.14	Rfesd	218341	171.55	-0.682136	0.260986	-2.61369	0.00895702	0.999909	0.000137271	0.0194453
ENSMUSG00000038084.16	Opa1	74143	1215.92	-0.315355	0.120676	-2.61324	0.00896896	0.999909	0.000137641	0.0194453
ENSMUSG00000040298.6	Btbd16	330660	327.258	-0.744316	0.285478	-2.60726	0.009127	0.999909	0.000142578	0.0199855
ENSMUSG00000055313.15	Pgbd1	319207	45.4109	-1.17722	0.452512	-2.60152	0.00928106	0.999909	0.000147474	0.0201984
ENSMUSG00000031293.13	Rs1	20147	62.6354	-1.44993	0.558214	-2.59745	0.00939184	0.999909	0.000151046	0.0204248
ENSMUSG00000070345.3	Hsf5	327992	476.311	-0.62156	0.242179	-2.56653	0.010272	0.999909	0.000180941	0.0238709
ENSMUSG00000043418.4	Lrit2	239038	57.2021	-4.82878	1.89093	-2.55365	0.01066	0.999909	0.000194971	0.0255341
ENSMUSG00000055435.6	Maf	17132	728.432	-0.491916	0.194425	-2.5301	0.0114028	0.999909	0.000223292	0.0280037
ENSMUSG00000023882.15	Zfp54	22712	63.1329	-0.976378	0.386262	-2.52776	0.0114793	0.999909	0.000226315	0.0280037
ENSMUSG00000022032.14	Scara5	71145	79.1172	-2.21149	0.88286	-2.50491	0.0122482	0.999909	0.000257843	0.0310485
ENSMUSG00000045106.12	Ccdc73	211936	169.791	-0.599562	0.240801	-2.48986	0.0127792	0.999909	0.000280811	0.0325052
ENSMUSG00000066880.15	Zfp617	170938	629.069	-0.475897	0.190937	-2.49242	0.0126875	0.999909	0.000276774	0.0325052
ENSMUSG00000048004.15	Tmem196	217951	217.954	-0.530241	0.212838	-2.49129	0.0127282	0.999909	0.000278562	0.0325052
ENSMUSG00000069303.7	H2bc24	665622	92.3604	-1.16848	0.468211	-2.49563	0.0125735	0.999909	0.000271799	0.0325052
ENSMUSG00000018841.17	Rad51d	19364	464.916	-0.419878	0.168999	-2.4845	0.0129734	0.999909	0.000289455	0.0330178
ENSMUSG00000047246.7	H2bc6	319179	326.745	-0.547816	0.220638	-2.48288	0.0130326	0.999909	0.000292113	0.0330178
ENSMUSG00000025262.8	Fam120c	207375	560.717	-0.464526	0.187513	-2.47729	0.0132383	0.999909	0.000301453	0.0337421
ENSMUSG00000045341.2	Olfr167	258937	56.3643	-4.34743	1.76308	-2.46581	0.0136705	0.999909	0.000321548	0.035394
ENSMUSG00000097292.2	A230107N01Rik	320919	105.275	-0.823774	0.334851	-2.46012	0.0138889	0.999909	0.000331951	0.0358787
ENSMUSG00000039545.16	Flicr	78185	61.0366	-1.05368	0.429397	-2.45385	0.0141334	0.999909	0.000343786	0.0369354
ENSMUSG00000035759.4	Bbs10	71769	271.348	-0.647114	0.264635	-2.44531	0.0144728	0.999909	0.000360556	0.0385066
ENSMUSG00000075324.13	Fign	60344	922.903	-0.396564	0.163342	-2.42782	0.0151899	0.999909	0.000397298	0.0414438
ENSMUSG00000015342.6	Xk	22439	162.052	-0.55762	0.230228	-2.42204	0.0154339	0.999909	0.000410199	0.0425421
ENSMUSG00000021816.11	Ppp3cb	19056	1181.03	-0.346377	0.143116	-2.42026	0.0155095	0.999909	0.000414239	0.0427142
ENSMUSG00000017286.15	Glod4	67201	1018.04	-0.338881	0.141135	-2.40112	0.0163452	0.999909	0.000460198	0.045992
ENSMUSG00000045790.10	Ccdc149	100503884	319.724	-0.444436	0.185675	-2.39363	0.0166827	0.999909	0.000479438	0.0470059
ENSMUSG00000002814.15	Top3a	21975	490.218	-0.386393	0.161337	-2.39494	0.0166231	0.999909	0.000476009	0.0470059
ENSMUSG00000044827.10	Tlr1	21897	257.489	-0.580438	0.242857	-2.39004	0.0168466	0.999909	0.000488917	0.0476747
ENSMUSG00000026393.10	Nek7	59125	1067.73	-0.359542	0.151071	-2.37995	0.0173149	0.999909	0.000516522	0.0492592
ENSMUSG00000079685.10	Ulbp1	77777	41.5347	-1.8283	0.767788	-2.38125	0.0172539	0.999909	0.000512882	0.0492592

## Sheet: GK1t vs. GS1t, GO-up
ID	Term	Ont	N	Up	P.Up	Genes.Up
GO:0005634	nucleus	CC	7023	74	4.9503e-19	Bdnf, Btg2, Cdk11b, Cenpa, Slc29a2, Egr1, Egr2, Egr4, Fos, Fosb, Fosl2, Gapdh, Gem, Nr4a1, Hr, Junb, Klf2, Rps2, Mxd1, Mapkapk5, Sik1, Nr4a3, Nr4a2, Nobox, Ptgs2, Ptma, Rgs2, Polr1c, Plk2, Srf, Surf6, Tgif1, Tpt1, Zyx, Gadd45g, Impdh2, Taf10, Nubp2, Rpl7a, Bag3, Siva1, Usp2, Ddx20, Sertad1, Rassf1, Pard6a, Myoz1, Nip7, Fam53c, Snrnp40, Sh3d21, Cwc25, Nop9, Taf11, Mlip, Tfpt, Ndel1, Tiparp, Tra2a,…
GO:0043231	intracellular membrane-bounded organelle	CC	10522	87	1.11162e-16	Ap2m1, Bdnf, Btg2, Cdk11b, Cenpa, Slc29a2, Egr1, Egr2, Egr4, Fos, Fosb, Fosl2, Gapdh, Gem, Nr4a1, Hr, Junb, Klf2, Rps2, Mxd1, Mapkapk5, Sik1, Ppp1r15a, Nr4a3, Nr4a2, Nobox, Ptgs2, Ptma, Rgs2, Polr1c, Plk2, Srf, Surf6, Tgif1, Tpt1, Zyx, Gadd45g, Impdh2, Taf10, Lypla2, Nubp2, Rpl7a, Tbl2, Bag3, Siva1, Usp2, Ppp1r3c, Ddx20, Sertad1, Rassf1, Pard6a, Myoz1, Nip7, Fam53c, Atp5md, Snrnp40, Sh3d21, Cwc25…
GO:0005622	intracellular	CC	13918	99	8.00426e-16	Amd1, Ap2m1, Bdnf, Btg2, Cdk11b, Cenpa, Slc29a2, Egr1, Egr2, Egr4, Fos, Fosb, Fosl2, Gapdh, Gem, Nr4a1, Hr, Junb, Klf2, Rps2, Mxd1, Mapkapk5, Sik1, Ppp1r15a, Nr4a3, Nr4a2, Nobox, Ptgs2, Ptma, Rgs2, Polr1c, Rps17, Plk2, Srf, Surf6, Tgif1, Tpt1, Zyx, Gadd45g, Impdh2, Taf10, Lypla2, Nubp2, Rpl7a, Tbl2, Bag3, Siva1, Usp2, Ppp1r3c, Ddx20, Sertad1, Rassf1, Pard6a, Myoz1, Nip7, Fam53c, Atp5md, Snrnp40, …
GO:0043229	intracellular organelle	CC	12185	92	1.71446e-15	Ap2m1, Bdnf, Btg2, Cdk11b, Cenpa, Slc29a2, Egr1, Egr2, Egr4, Fos, Fosb, Fosl2, Gapdh, Gem, Nr4a1, Hr, Junb, Klf2, Rps2, Mxd1, Mapkapk5, Sik1, Ppp1r15a, Nr4a3, Nr4a2, Nobox, Ptgs2, Ptma, Rgs2, Polr1c, Rps17, Plk2, Srf, Surf6, Tgif1, Tpt1, Zyx, Gadd45g, Impdh2, Taf10, Lypla2, Nubp2, Rpl7a, Tbl2, Bag3, Siva1, Usp2, Ppp1r3c, Ddx20, Sertad1, Rassf1, Pard6a, Myoz1, Nip7, Fam53c, Atp5md, Snrnp40, Sh3d21…
GO:0043226	organelle	CC	12533	93	2.93652e-15	Ap2m1, Bdnf, Btg2, Cdk11b, Cenpa, Dclk1, Slc29a2, Egr1, Egr2, Egr4, Fos, Fosb, Fosl2, Gapdh, Gem, Nr4a1, Hr, Junb, Klf2, Rps2, Mxd1, Mapkapk5, Sik1, Ppp1r15a, Nr4a3, Nr4a2, Nobox, Ptgs2, Ptma, Rgs2, Polr1c, Rps17, Plk2, Srf, Surf6, Tgif1, Tpt1, Zyx, Gadd45g, Impdh2, Taf10, Lypla2, Nubp2, Rpl7a, Tbl2, Bag3, Siva1, Usp2, Ppp1r3c, Ddx20, Sertad1, Rassf1, Pard6a, Myoz1, Nip7, Fam53c, Atp5md, Snrnp40,…
GO:0043227	membrane-bounded organelle	CC	11284	88	3.00041e-15	Ap2m1, Bdnf, Btg2, Cdk11b, Cenpa, Slc29a2, Egr1, Egr2, Egr4, Fos, Fosb, Fosl2, Gapdh, Gem, Nr4a1, Hr, Junb, Klf2, Rps2, Mxd1, Mapkapk5, Sik1, Ppp1r15a, Nr4a3, Nr4a2, Nobox, Ptgs2, Ptma, Rgs2, Polr1c, Plk2, Srf, Surf6, Tgif1, Tpt1, Zyx, Gadd45g, Impdh2, Taf10, Lypla2, Nubp2, Rpl7a, Tbl2, Bag3, Siva1, Usp2, Ppp1r3c, Ddx20, Sertad1, Rassf1, Pard6a, Myoz1, Nip7, Fam53c, Atp5md, Snrnp40, Sh3d21, Cwc25…
GO:0034641	cellular nitrogen compound metabolic process	BP	5741	61	6.1656e-15	Amd1, Bdnf, Btg2, Cdk11b, Egr1, Egr2, Egr4, Fos, Fosb, Fosl2, Gapdh, Nr4a1, Hr, Ccn1, Junb, Klf2, Rps2, Mxd1, Mapkapk5, Sik1, Ppp1r15a, Nr4a3, Nr4a2, Nobox, Ptgs2, Rgs2, Polr1c, Rps17, Srf, Tgif1, Impdh2, Taf10, Rpl7a, Bag3, Siva1, Usp2, Ddx20, Sertad1, Myoz1, Snrnp40, Rpl37, Cwc25, Nop9, Bambi, Rpl22l1, Taf11, Mlip, Tfpt, Tra2a, Spty2d1, Hinfp, Wdr74, Eprs, Actr5, Utp14b, Tbl3, Arid5a, Dhx8, Npa…
GO:0010467	gene expression	BP	5531	59	2.04401e-14	Bdnf, Btg2, Cdk11b, Egr1, Egr2, Egr4, Fos, Fosb, Fosl2, Gapdh, Nr4a1, Hr, Ccn1, Junb, Klf2, Rps2, Mxd1, Mapkapk5, Sik1, Ppp1r15a, Nr4a3, Nr4a2, Nobox, Ptgs2, Rgs2, Polr1c, Rps17, Srf, Tgif1, Gadd45g, Taf10, Rpl7a, Bag3, Siva1, Usp2, Ddx20, Sertad1, Myoz1, Snrnp40, Rpl37, Cwc25, Nop9, Bambi, Rpl22l1, Taf11, Mlip, Tiparp, Tra2a, Spty2d1, Hinfp, Wdr74, Eprs, Actr5, Utp14b, Tbl3, Arid5a, Dhx8, Npas4,…
GO:0090304	nucleic acid metabolic process	BP	4605	53	4.79591e-14	Bdnf, Btg2, Cdk11b, Egr1, Egr2, Egr4, Fos, Fosb, Fosl2, Nr4a1, Hr, Ccn1, Junb, Klf2, Mxd1, Mapkapk5, Sik1, Ppp1r15a, Nr4a3, Nr4a2, Nobox, Polr1c, Rps17, Srf, Tgif1, Taf10, Rpl7a, Bag3, Siva1, Usp2, Ddx20, Sertad1, Myoz1, Snrnp40, Cwc25, Nop9, Bambi, Taf11, Mlip, Tfpt, Tra2a, Spty2d1, Hinfp, Wdr74, Eprs, Actr5, Utp14b, Tbl3, Arid5a, Dhx8, Npas4, Leo1, Acd
GO:0016070	RNA metabolic process	BP	4140	50	5.82859e-14	Bdnf, Btg2, Cdk11b, Egr1, Egr2, Egr4, Fos, Fosb, Fosl2, Nr4a1, Hr, Ccn1, Junb, Klf2, Mxd1, Sik1, Ppp1r15a, Nr4a3, Nr4a2, Nobox, Polr1c, Rps17, Srf, Tgif1, Taf10, Rpl7a, Bag3, Siva1, Usp2, Ddx20, Sertad1, Myoz1, Snrnp40, Cwc25, Nop9, Bambi, Taf11, Mlip, Tra2a, Spty2d1, Hinfp, Wdr74, Eprs, Actr5, Utp14b, Tbl3, Arid5a, Dhx8, Npas4, Leo1
GO:0006139	nucleobase-containing compound metabolic process	BP	5025	55	9.92922e-14	Bdnf, Btg2, Cdk11b, Egr1, Egr2, Egr4, Fos, Fosb, Fosl2, Gapdh, Nr4a1, Hr, Ccn1, Junb, Klf2, Mxd1, Mapkapk5, Sik1, Ppp1r15a, Nr4a3, Nr4a2, Nobox, Polr1c, Rps17, Srf, Tgif1, Impdh2, Taf10, Rpl7a, Bag3, Siva1, Usp2, Ddx20, Sertad1, Myoz1, Snrnp40, Cwc25, Nop9, Bambi, Taf11, Mlip, Tfpt, Tra2a, Spty2d1, Hinfp, Wdr74, Eprs, Actr5, Utp14b, Tbl3, Arid5a, Dhx8, Npas4, Leo1, Acd
GO:1901363	heterocyclic compound binding	MF	5243	56	1.44722e-13	Cdk11b, Cenpa, Dclk1, Egr1, Egr2, Egr4, Fos, Fosb, Fosl2, Gapdh, Gem, Nr4a1, Hr, Junb, Klf2, Rps2, Mxd1, Sik1, Nr4a3, Nr4a2, Nobox, Ptgs2, Polr1c, Plk2, Srf, Surf6, Tgif1, Impdh2, Taf10, Nubp2, Rpl7a, Bag3, Ddx20, Nip7, Rpl37, Nop9, Rpl22l1, Taf11, Tfpt, Tiparp, Tra2a, Spty2d1, Hinfp, Eprs, Ube2j2, Rem2, Irgq, Tbl3, Arid5a, Rhot2, Dhx8, Npas4, Arl4c, Gmppb, Acd, Gbp11
GO:0044271	cellular nitrogen compound biosynthetic process	BP	4272	50	1.98799e-13	Amd1, Bdnf, Btg2, Egr1, Egr2, Egr4, Fos, Fosb, Fosl2, Gapdh, Nr4a1, Hr, Ccn1, Junb, Klf2, Rps2, Mxd1, Mapkapk5, Sik1, Ppp1r15a, Nr4a3, Nr4a2, Nobox, Ptgs2, Rgs2, Polr1c, Rps17, Srf, Tgif1, Impdh2, Taf10, Bag3, Siva1, Usp2, Ddx20, Sertad1, Myoz1, Rpl37, Bambi, Rpl22l1, Taf11, Mlip, Spty2d1, Hinfp, Eprs, Actr5, Arid5a, Npas4, Leo1, Acd
GO:0043170	macromolecule metabolic process	BP	8833	74	2.80116e-13	Ap2m1, Bdnf, Btg2, Cdk11b, Dclk1, Egr1, Egr2, Egr4, Fos, Fosb, Fosl2, Gapdh, Nr4a1, Hr, Ccn1, Junb, Klf2, Rps2, Mxd1, Mapkapk5, Sik1, Ppp1r15a, Nr4a3, Nr4a2, Nobox, Ptgs2, Rgs2, Polr1c, Rps17, Plk2, Srf, Tgif1, Gadd45g, Taf10, Lypla2, Rpl7a, Bag3, Siva1, Usp2, Ppp1r3c, Ddx20, Sertad1, Rassf1, Pard6a, Myoz1, Snrnp40, Rpl37, Cwc25, Atg12, Nop9, Bambi, Rpl22l1, Taf11, Mlip, Tfpt, Fbxo33, Tiparp, Tra…
GO:0046483	heterocycle metabolic process	BP	5159	55	3.01494e-13	Bdnf, Btg2, Cdk11b, Egr1, Egr2, Egr4, Fos, Fosb, Fosl2, Gapdh, Nr4a1, Hr, Ccn1, Junb, Klf2, Mxd1, Mapkapk5, Sik1, Ppp1r15a, Nr4a3, Nr4a2, Nobox, Polr1c, Rps17, Srf, Tgif1, Impdh2, Taf10, Rpl7a, Bag3, Siva1, Usp2, Ddx20, Sertad1, Myoz1, Snrnp40, Cwc25, Nop9, Bambi, Taf11, Mlip, Tfpt, Tra2a, Spty2d1, Hinfp, Wdr74, Eprs, Actr5, Utp14b, Tbl3, Arid5a, Dhx8, Npas4, Leo1, Acd
GO:0044237	cellular metabolic process	BP	9722	78	3.01998e-13	Amd1, Ap2m1, Bdnf, Btg2, Cdk11b, Dclk1, Egr1, Egr2, Egr4, Fos, Fosb, Fosl2, Gapdh, Nr4a1, Hr, Ccn1, Junb, Klf2, Rps2, Mxd1, Mapkapk5, Sik1, Ppp1r15a, Nr4a3, Nr4a2, Nobox, Ptgs2, Rgs2, Polr1c, Rps17, Plk2, Srf, Tgif1, Gadd45g, Impdh2, Taf10, Lypla2, Nubp2, Rpl7a, Bag3, Siva1, Usp2, Ppp1r3c, Ddx20, Sertad1, Rassf1, Pard6a, Myoz1, Snrnp40, Rpl37, Cwc25, Atg12, Nop9, Coq10b, Bambi, Rpl22l1, Taf11, Ml…
GO:0097159	organic cyclic compound binding	MF	5344	56	3.27337e-13	Cdk11b, Cenpa, Dclk1, Egr1, Egr2, Egr4, Fos, Fosb, Fosl2, Gapdh, Gem, Nr4a1, Hr, Junb, Klf2, Rps2, Mxd1, Sik1, Nr4a3, Nr4a2, Nobox, Ptgs2, Polr1c, Plk2, Srf, Surf6, Tgif1, Impdh2, Taf10, Nubp2, Rpl7a, Bag3, Ddx20, Nip7, Rpl37, Nop9, Rpl22l1, Taf11, Tfpt, Tiparp, Tra2a, Spty2d1, Hinfp, Eprs, Ube2j2, Rem2, Irgq, Tbl3, Arid5a, Rhot2, Dhx8, Npas4, Arl4c, Gmppb, Acd, Gbp11
GO:0034645	cellular macromolecule biosynthetic process	BP	4355	50	4.19071e-13	Bdnf, Btg2, Egr1, Egr2, Egr4, Fos, Fosb, Fosl2, Gapdh, Nr4a1, Hr, Ccn1, Junb, Klf2, Rps2, Mxd1, Mapkapk5, Sik1, Ppp1r15a, Nr4a3, Nr4a2, Nobox, Rgs2, Polr1c, Rps17, Srf, Tgif1, Taf10, Bag3, Siva1, Usp2, Ppp1r3c, Ddx20, Sertad1, Myoz1, Rpl37, Atg12, Bambi, Rpl22l1, Taf11, Mlip, Spty2d1, Hinfp, Eprs, Actr5, Arid5a, Npas4, B3gnt8, Leo1, Acd
GO:0005488	binding	MF	13479	93	5.419e-13	Amd1, Ap2m1, Bdnf, Btg2, Cdk11b, Cenpa, Dclk1, Egr1, Egr2, Egr4, Fos, Fosb, Fosl2, Gapdh, Gem, Nr4a1, Hr, Ccn1, Junb, Klf2, Rps2, Mxd1, Mapkapk5, Sik1, Ppp1r15a, Nr4a3, Nr4a2, Nobox, Pcdh8, Ptgs2, Ptma, Rgs2, Polr1c, Plk2, Srf, Surf6, Tgif1, Tpt1, Zyx, Gadd45g, Impdh2, Taf10, Nubp2, Rpl7a, Tbl2, Bag3, Siva1, Pvr, Usp2, Ppp1r3c, Ddx20, Sertad1, Rassf1, Pard6a, Myoz1, Nip7, Adprm, Ogfod2, Rpl37, At…
GO:0006725	cellular aromatic compound metabolic process	BP	5239	55	5.74244e-13	Bdnf, Btg2, Cdk11b, Egr1, Egr2, Egr4, Fos, Fosb, Fosl2, Gapdh, Nr4a1, Hr, Ccn1, Junb, Klf2, Mxd1, Mapkapk5, Sik1, Ppp1r15a, Nr4a3, Nr4a2, Nobox, Polr1c, Rps17, Srf, Tgif1, Impdh2, Taf10, Rpl7a, Bag3, Siva1, Usp2, Ddx20, Sertad1, Myoz1, Snrnp40, Cwc25, Nop9, Bambi, Taf11, Mlip, Tfpt, Tra2a, Spty2d1, Hinfp, Wdr74, Eprs, Actr5, Utp14b, Tbl3, Arid5a, Dhx8, Npas4, Leo1, Acd
GO:0009059	macromolecule biosynthetic process	BP	4410	50	6.79733e-13	Bdnf, Btg2, Egr1, Egr2, Egr4, Fos, Fosb, Fosl2, Gapdh, Nr4a1, Hr, Ccn1, Junb, Klf2, Rps2, Mxd1, Mapkapk5, Sik1, Ppp1r15a, Nr4a3, Nr4a2, Nobox, Rgs2, Polr1c, Rps17, Srf, Tgif1, Taf10, Bag3, Siva1, Usp2, Ppp1r3c, Ddx20, Sertad1, Myoz1, Rpl37, Atg12, Bambi, Rpl22l1, Taf11, Mlip, Spty2d1, Hinfp, Eprs, Actr5, Arid5a, Npas4, B3gnt8, Leo1, Acd
GO:1901360	organic cyclic compound metabolic process	BP	5449	56	7.47758e-13	Bdnf, Btg2, Cdk11b, Egr1, Egr2, Egr4, Fos, Fosb, Fosl2, Gapdh, Nr4a1, Hr, Ccn1, Junb, Klf2, Mxd1, Mapkapk5, Sik1, Ppp1r15a, Nr4a3, Nr4a2, Nobox, Polr1c, Rps17, Srf, Tgif1, Impdh2, Taf10, Rpl7a, Bag3, Siva1, Usp2, Ddx20, Sertad1, Myoz1, Snrnp40, Cwc25, Nop9, Bambi, Taf11, Mlip, Tfpt, Tiparp, Tra2a, Spty2d1, Hinfp, Wdr74, Eprs, Actr5, Utp14b, Tbl3, Arid5a, Dhx8, Npas4, Leo1, Acd
GO:0006807	nitrogen compound metabolic process	BP	8999	74	7.77032e-13	Amd1, Bdnf, Btg2, Cdk11b, Dclk1, Egr1, Egr2, Egr4, Fos, Fosb, Fosl2, Gapdh, Nr4a1, Hr, Ccn1, Junb, Klf2, Rps2, Mxd1, Mapkapk5, Sik1, Ppp1r15a, Nr4a3, Nr4a2, Nobox, Ptgs2, Rgs2, Polr1c, Rps17, Plk2, Srf, Tgif1, Gadd45g, Impdh2, Taf10, Lypla2, Rpl7a, Bag3, Siva1, Usp2, Ddx20, Sertad1, Rassf1, Pard6a, Myoz1, Snrnp40, Rpl37, Cwc25, Atg12, Nop9, Bambi, Rpl22l1, Taf11, Mlip, Tfpt, Fbxo33, Tiparp, Tra2a…
GO:0031981	nuclear lumen	CC	4114	48	8.819e-13	Bdnf, Cdk11b, Cenpa, Egr1, Egr2, Egr4, Fos, Fosb, Fosl2, Nr4a1, Hr, Junb, Klf2, Rps2, Mxd1, Mapkapk5, Nr4a2, Polr1c, Srf, Surf6, Tgif1, Tpt1, Taf10, Rpl7a, Siva1, Nip7, Snrnp40, Sh3d21, Cwc25, Nop9, Taf11, Mlip, Tfpt, Tra2a, Spty2d1, Unc45a, Hinfp, Wdr74, Actr5, Utp14b, Tbl3, Arid5a, Rhot2, Dhx8, Npas4, Leo1, Apold1, Acd
GO:0044249	cellular biosynthetic process	BP	5218	54	1.937e-12	Amd1, Bdnf, Btg2, Egr1, Egr2, Egr4, Fos, Fosb, Fosl2, Gapdh, Nr4a1, Hr, Ccn1, Junb, Klf2, Rps2, Mxd1, Mapkapk5, Sik1, Ppp1r15a, Nr4a3, Nr4a2, Nobox, Ptgs2, Rgs2, Polr1c, Rps17, Srf, Tgif1, Impdh2, Taf10, Bag3, Siva1, Usp2, Ppp1r3c, Ddx20, Sertad1, Myoz1, Rpl37, Atg12, Coq10b, Bambi, Rpl22l1, Taf11, Mlip, Spty2d1, Hinfp, Eprs, Actr5, Arid5a, Npas4, B3gnt8, Leo1, Acd
GO:0009058	biosynthetic process	BP	5403	55	2.06307e-12	Amd1, Bdnf, Btg2, Egr1, Egr2, Egr4, Fos, Fosb, Fosl2, Gapdh, Nr4a1, Hr, Ccn1, Junb, Klf2, Rps2, Mxd1, Mapkapk5, Sik1, Ppp1r15a, Nr4a3, Nr4a2, Nobox, Ptgs2, Rgs2, Polr1c, Rps17, Srf, Tgif1, Impdh2, Taf10, Bag3, Siva1, Usp2, Ppp1r3c, Ddx20, Sertad1, Myoz1, Rpl37, Atg12, Coq10b, Bambi, Rpl22l1, Taf11, Mlip, Spty2d1, Hinfp, Eprs, Actr5, Arid5a, Npas4, B3gnt8, Leo1, Gmppb, Acd
GO:1901576	organic substance biosynthetic process	BP	5307	54	3.84085e-12	Amd1, Bdnf, Btg2, Egr1, Egr2, Egr4, Fos, Fosb, Fosl2, Gapdh, Nr4a1, Hr, Ccn1, Junb, Klf2, Rps2, Mxd1, Mapkapk5, Sik1, Ppp1r15a, Nr4a3, Nr4a2, Nobox, Ptgs2, Rgs2, Polr1c, Rps17, Srf, Tgif1, Impdh2, Taf10, Bag3, Siva1, Usp2, Ppp1r3c, Ddx20, Sertad1, Myoz1, Rpl37, Atg12, Coq10b, Bambi, Rpl22l1, Taf11, Mlip, Spty2d1, Hinfp, Eprs, Actr5, Arid5a, Npas4, B3gnt8, Leo1, Acd
GO:0044260	cellular macromolecule metabolic process	BP	7460	65	6.28708e-12	Ap2m1, Bdnf, Btg2, Cdk11b, Dclk1, Egr1, Egr2, Egr4, Fos, Fosb, Fosl2, Gapdh, Nr4a1, Hr, Ccn1, Junb, Klf2, Rps2, Mxd1, Mapkapk5, Sik1, Ppp1r15a, Nr4a3, Nr4a2, Nobox, Ptgs2, Rgs2, Polr1c, Rps17, Plk2, Srf, Tgif1, Gadd45g, Taf10, Lypla2, Bag3, Siva1, Usp2, Ppp1r3c, Ddx20, Sertad1, Rassf1, Pard6a, Myoz1, Rpl37, Atg12, Bambi, Rpl22l1, Taf11, Mlip, Tfpt, Fbxo33, Tiparp, Spty2d1, Hinfp, Ppif, Eprs, Actr…
GO:0070013	intracellular organelle lumen	CC	4525	49	7.29968e-12	Bdnf, Cdk11b, Cenpa, Egr1, Egr2, Egr4, Fos, Fosb, Fosl2, Nr4a1, Hr, Junb, Klf2, Rps2, Mxd1, Mapkapk5, Nr4a2, Polr1c, Srf, Surf6, Tgif1, Tpt1, Taf10, Rpl7a, Siva1, Nip7, Snrnp40, Sh3d21, Cwc25, Nop9, Taf11, Mlip, Tfpt, Tra2a, Spty2d1, Unc45a, Hinfp, Ppif, Wdr74, Actr5, Utp14b, Tbl3, Arid5a, Rhot2, Dhx8, Npas4, Leo1, Apold1, Acd
GO:0031974	membrane-enclosed lumen	CC	4526	49	7.35948e-12	Bdnf, Cdk11b, Cenpa, Egr1, Egr2, Egr4, Fos, Fosb, Fosl2, Nr4a1, Hr, Junb, Klf2, Rps2, Mxd1, Mapkapk5, Nr4a2, Polr1c, Srf, Surf6, Tgif1, Tpt1, Taf10, Rpl7a, Siva1, Nip7, Snrnp40, Sh3d21, Cwc25, Nop9, Taf11, Mlip, Tfpt, Tra2a, Spty2d1, Unc45a, Hinfp, Ppif, Wdr74, Actr5, Utp14b, Tbl3, Arid5a, Rhot2, Dhx8, Npas4, Leo1, Apold1, Acd
GO:0043233	organelle lumen	CC	4526	49	7.35948e-12	Bdnf, Cdk11b, Cenpa, Egr1, Egr2, Egr4, Fos, Fosb, Fosl2, Nr4a1, Hr, Junb, Klf2, Rps2, Mxd1, Mapkapk5, Nr4a2, Polr1c, Srf, Surf6, Tgif1, Tpt1, Taf10, Rpl7a, Siva1, Nip7, Snrnp40, Sh3d21, Cwc25, Nop9, Taf11, Mlip, Tfpt, Tra2a, Spty2d1, Unc45a, Hinfp, Ppif, Wdr74, Actr5, Utp14b, Tbl3, Arid5a, Rhot2, Dhx8, Npas4, Leo1, Apold1, Acd
GO:0008150	biological_process	BP	20950	115	8.0839e-12	Amd1, Ap2m1, Bdnf, Btg2, Cdk11b, Cenpa, Dclk1, Slc29a2, Egr1, Egr2, Egr4, Fos, Fosb, Fosl2, Gapdh, Gem, Nr4a1, Hr, Ccn1, Junb, Klf2, Rps2, Mxd1, Mapkapk5, Sik1, Ppp1r15a, Nr4a3, Nr4a2, Nobox, Pcdh8, Ptgs2, Ptma, Rgs2, Polr1c, Rps17, Plk2, Srf, Surf6, Tgif1, Tpt1, Zyx, Gadd45g, Impdh2, Taf10, Lypla2, Nubp2, Rpl7a, Tbl2, Bag3, Siva1, Pvr, Usp2, Ppp1r3c, Ddx20, Sertad1, Rassf1, Pard6a, Myoz1, Nip7, …
GO:0009987	cellular process	BP	16616	102	1.0375e-11	Amd1, Ap2m1, Bdnf, Btg2, Cdk11b, Cenpa, Dclk1, Slc29a2, Egr1, Egr2, Egr4, Fos, Fosb, Fosl2, Gapdh, Gem, Nr4a1, Hr, Ccn1, Junb, Klf2, Rps2, Mxd1, Mapkapk5, Sik1, Ppp1r15a, Nr4a3, Nr4a2, Nobox, Pcdh8, Ptgs2, Ptma, Rgs2, Polr1c, Rps17, Plk2, Srf, Surf6, Tgif1, Tpt1, Zyx, Gadd45g, Impdh2, Taf10, Lypla2, Nubp2, Rpl7a, Tbl2, Bag3, Siva1, Pvr, Usp2, Ppp1r3c, Ddx20, Sertad1, Rassf1, Pard6a, Myoz1, Nip7, …
GO:0008152	metabolic process	BP	10809	80	1.04475e-11	Amd1, Ap2m1, Bdnf, Btg2, Cdk11b, Dclk1, Egr1, Egr2, Egr4, Fos, Fosb, Fosl2, Gapdh, Nr4a1, Hr, Ccn1, Junb, Klf2, Rps2, Mxd1, Mapkapk5, Sik1, Ppp1r15a, Nr4a3, Nr4a2, Nobox, Ptgs2, Rgs2, Polr1c, Rps17, Plk2, Srf, Tgif1, Gadd45g, Impdh2, Taf10, Lypla2, Nubp2, Rpl7a, Bag3, Siva1, Usp2, Ppp1r3c, Ddx20, Sertad1, Rassf1, Pard6a, Myoz1, Snrnp40, Ogfod2, Rpl37, Cwc25, Atg12, Nop9, Coq10b, Bambi, Rpl22l1, T…
GO:0005575	cellular_component	CC	21078	115	1.46265e-11	Amd1, Ap2m1, Bdnf, Btg2, Cdk11b, Cenpa, Dclk1, Slc29a2, Egr1, Egr2, Egr4, Fos, Fosb, Fosl2, Gapdh, Gem, Nr4a1, Hr, Ccn1, Junb, Klf2, Rps2, Mxd1, Mapkapk5, Sik1, Ppp1r15a, Nr4a3, Nr4a2, Nobox, Pcdh8, Ptgs2, Ptma, Rgs2, Polr1c, Rps17, Plk2, Srf, Surf6, Tgif1, Tpt1, Zyx, Gadd45g, Impdh2, Taf10, Lypla2, Nubp2, Rpl7a, Tbl2, Bag3, Siva1, Pvr, Usp2, Ppp1r3c, Ddx20, Sertad1, Rassf1, Pard6a, Myoz1, Cystm1…
GO:0044238	primary metabolic process	BP	9560	74	1.99625e-11	Bdnf, Btg2, Cdk11b, Dclk1, Egr1, Egr2, Egr4, Fos, Fosb, Fosl2, Gapdh, Nr4a1, Hr, Ccn1, Junb, Klf2, Rps2, Mxd1, Mapkapk5, Sik1, Ppp1r15a, Nr4a3, Nr4a2, Nobox, Ptgs2, Rgs2, Polr1c, Rps17, Plk2, Srf, Tgif1, Gadd45g, Impdh2, Taf10, Lypla2, Rpl7a, Bag3, Siva1, Usp2, Ppp1r3c, Ddx20, Sertad1, Rassf1, Pard6a, Myoz1, Snrnp40, Rpl37, Cwc25, Atg12, Nop9, Bambi, Rpl22l1, Taf11, Mlip, Tfpt, Fbxo33, Tiparp, Tr…
GO:0071704	organic substance metabolic process	BP	10294	77	2.72275e-11	Amd1, Ap2m1, Bdnf, Btg2, Cdk11b, Dclk1, Egr1, Egr2, Egr4, Fos, Fosb, Fosl2, Gapdh, Nr4a1, Hr, Ccn1, Junb, Klf2, Rps2, Mxd1, Mapkapk5, Sik1, Ppp1r15a, Nr4a3, Nr4a2, Nobox, Ptgs2, Rgs2, Polr1c, Rps17, Plk2, Srf, Tgif1, Gadd45g, Impdh2, Taf10, Lypla2, Rpl7a, Bag3, Siva1, Usp2, Ppp1r3c, Ddx20, Sertad1, Rassf1, Pard6a, Myoz1, Snrnp40, Rpl37, Cwc25, Atg12, Nop9, Coq10b, Bambi, Rpl22l1, Taf11, Mlip, Tfp…
GO:0003674	molecular_function	MF	20522	113	3.65062e-11	Amd1, Ap2m1, Bdnf, Btg2, Cdk11b, Cenpa, Dclk1, Slc29a2, Egr1, Egr2, Egr4, Fos, Fosb, Fosl2, Gapdh, Gem, Nr4a1, Hr, Ccn1, Junb, Klf2, Rps2, Mxd1, Mapkapk5, Sik1, Ppp1r15a, Nr4a3, Nr4a2, Nobox, Pcdh8, Ptgs2, Ptma, Rgs2, Polr1c, Rps17, Plk2, Srf, Surf6, Tgif1, Tpt1, Zyx, Gadd45g, Impdh2, Taf10, Lypla2, Nubp2, Rpl7a, Tbl2, Bag3, Siva1, Pvr, Usp2, Ppp1r3c, Ddx20, Sertad1, Rassf1, Pard6a, Myoz1, Cystm1…
GO:2000112	regulation of cellular macromolecule biosynthetic process	BP	3598	42	4.43098e-11	Bdnf, Btg2, Egr1, Egr2, Egr4, Fos, Fosb, Fosl2, Gapdh, Nr4a1, Hr, Ccn1, Junb, Klf2, Mxd1, Mapkapk5, Sik1, Ppp1r15a, Nr4a3, Nr4a2, Nobox, Rgs2, Srf, Tgif1, Taf10, Bag3, Siva1, Usp2, Ppp1r3c, Ddx20, Sertad1, Myoz1, Bambi, Mlip, Spty2d1, Hinfp, Eprs, Actr5, Arid5a, Npas4, Leo1, Acd
GO:0003676	nucleic acid binding	MF	3322	40	6.07288e-11	Cenpa, Egr1, Egr2, Egr4, Fos, Fosb, Fosl2, Nr4a1, Hr, Junb, Klf2, Rps2, Mxd1, Nr4a3, Nr4a2, Nobox, Polr1c, Srf, Surf6, Tgif1, Impdh2, Taf10, Rpl7a, Ddx20, Nip7, Rpl37, Nop9, Rpl22l1, Taf11, Tfpt, Tiparp, Tra2a, Spty2d1, Hinfp, Eprs, Tbl3, Arid5a, Dhx8, Npas4, Acd
GO:0031326	regulation of cellular biosynthetic process	BP	3799	43	6.38534e-11	Bdnf, Btg2, Egr1, Egr2, Egr4, Fos, Fosb, Fosl2, Gapdh, Nr4a1, Hr, Ccn1, Junb, Klf2, Mxd1, Mapkapk5, Sik1, Ppp1r15a, Nr4a3, Nr4a2, Nobox, Ptgs2, Rgs2, Srf, Tgif1, Taf10, Bag3, Siva1, Usp2, Ppp1r3c, Ddx20, Sertad1, Myoz1, Bambi, Mlip, Spty2d1, Hinfp, Eprs, Actr5, Arid5a, Npas4, Leo1, Acd
GO:0005654	nucleoplasm	CC	3332	40	6.65708e-11	Bdnf, Cdk11b, Cenpa, Egr1, Egr2, Fos, Fosb, Fosl2, Nr4a1, Hr, Junb, Rps2, Mxd1, Mapkapk5, Nr4a2, Polr1c, Surf6, Tgif1, Tpt1, Taf10, Siva1, Nip7, Snrnp40, Sh3d21, Cwc25, Taf11, Mlip, Tfpt, Tra2a, Spty2d1, Unc45a, Hinfp, Wdr74, Tbl3, Arid5a, Rhot2, Dhx8, Leo1, Apold1, Acd
GO:0010556	regulation of macromolecule biosynthetic process	BP	3646	42	6.75639e-11	Bdnf, Btg2, Egr1, Egr2, Egr4, Fos, Fosb, Fosl2, Gapdh, Nr4a1, Hr, Ccn1, Junb, Klf2, Mxd1, Mapkapk5, Sik1, Ppp1r15a, Nr4a3, Nr4a2, Nobox, Rgs2, Srf, Tgif1, Taf10, Bag3, Siva1, Usp2, Ppp1r3c, Ddx20, Sertad1, Myoz1, Bambi, Mlip, Spty2d1, Hinfp, Eprs, Actr5, Arid5a, Npas4, Leo1, Acd
GO:0005515	protein binding	MF	9159	71	8.28691e-11	Amd1, Ap2m1, Bdnf, Btg2, Cenpa, Egr1, Egr2, Fos, Gapdh, Gem, Nr4a1, Hr, Ccn1, Junb, Klf2, Rps2, Mxd1, Mapkapk5, Sik1, Ppp1r15a, Nr4a3, Nr4a2, Ptgs2, Ptma, Rgs2, Polr1c, Plk2, Srf, Tgif1, Tpt1, Zyx, Gadd45g, Impdh2, Taf10, Nubp2, Rpl7a, Tbl2, Bag3, Siva1, Pvr, Usp2, Ppp1r3c, Ddx20, Sertad1, Rassf1, Pard6a, Myoz1, Rpl37, Atg12, Bambi, Taf11, Mlip, Tfpt, Ndel1, Tra2a, Spty2d1, Unc45a, Hinfp, Ppif, E…
GO:0009889	regulation of biosynthetic process	BP	3877	43	1.22998e-10	Bdnf, Btg2, Egr1, Egr2, Egr4, Fos, Fosb, Fosl2, Gapdh, Nr4a1, Hr, Ccn1, Junb, Klf2, Mxd1, Mapkapk5, Sik1, Ppp1r15a, Nr4a3, Nr4a2, Nobox, Ptgs2, Rgs2, Srf, Tgif1, Taf10, Bag3, Siva1, Usp2, Ppp1r3c, Ddx20, Sertad1, Myoz1, Bambi, Mlip, Spty2d1, Hinfp, Eprs, Actr5, Arid5a, Npas4, Leo1, Acd
GO:0006366	transcription by RNA polymerase II	BP	2405	33	1.78695e-10	Btg2, Egr1, Egr2, Egr4, Fos, Fosb, Fosl2, Nr4a1, Hr, Ccn1, Junb, Klf2, Mxd1, Sik1, Ppp1r15a, Nr4a3, Nr4a2, Nobox, Polr1c, Srf, Tgif1, Taf10, Bag3, Usp2, Ddx20, Sertad1, Myoz1, Taf11, Mlip, Hinfp, Arid5a, Npas4, Leo1
GO:0034654	nucleobase-containing compound biosynthetic process	BP	3611	41	1.96328e-10	Bdnf, Btg2, Egr1, Egr2, Egr4, Fos, Fosb, Fosl2, Nr4a1, Hr, Ccn1, Junb, Klf2, Mxd1, Mapkapk5, Sik1, Ppp1r15a, Nr4a3, Nr4a2, Nobox, Polr1c, Srf, Tgif1, Impdh2, Taf10, Bag3, Siva1, Usp2, Ddx20, Sertad1, Myoz1, Bambi, Taf11, Mlip, Spty2d1, Hinfp, Actr5, Arid5a, Npas4, Leo1, Acd
GO:0110165	cellular anatomical entity	CC	18604	106	2.98643e-10	Amd1, Ap2m1, Bdnf, Btg2, Cdk11b, Cenpa, Dclk1, Slc29a2, Egr1, Egr2, Egr4, Fos, Fosb, Fosl2, Gapdh, Gem, Nr4a1, Hr, Ccn1, Junb, Klf2, Rps2, Mxd1, Mapkapk5, Sik1, Ppp1r15a, Nr4a3, Nr4a2, Nobox, Pcdh8, Ptgs2, Ptma, Rgs2, Polr1c, Rps17, Plk2, Srf, Surf6, Tgif1, Tpt1, Zyx, Gadd45g, Impdh2, Taf10, Lypla2, Nubp2, Rpl7a, Tbl2, Bag3, Siva1, Pvr, Usp2, Ppp1r3c, Ddx20, Sertad1, Rassf1, Pard6a, Myoz1, Cystm1…
GO:0018130	heterocycle biosynthetic process	BP	3676	41	3.3912e-10	Bdnf, Btg2, Egr1, Egr2, Egr4, Fos, Fosb, Fosl2, Nr4a1, Hr, Ccn1, Junb, Klf2, Mxd1, Mapkapk5, Sik1, Ppp1r15a, Nr4a3, Nr4a2, Nobox, Polr1c, Srf, Tgif1, Impdh2, Taf10, Bag3, Siva1, Usp2, Ddx20, Sertad1, Myoz1, Bambi, Taf11, Mlip, Spty2d1, Hinfp, Actr5, Arid5a, Npas4, Leo1, Acd
GO:0019438	aromatic compound biosynthetic process	BP	3689	41	3.77681e-10	Bdnf, Btg2, Egr1, Egr2, Egr4, Fos, Fosb, Fosl2, Nr4a1, Hr, Ccn1, Junb, Klf2, Mxd1, Mapkapk5, Sik1, Ppp1r15a, Nr4a3, Nr4a2, Nobox, Polr1c, Srf, Tgif1, Impdh2, Taf10, Bag3, Siva1, Usp2, Ddx20, Sertad1, Myoz1, Bambi, Taf11, Mlip, Spty2d1, Hinfp, Actr5, Arid5a, Npas4, Leo1, Acd
GO:0006351	transcription, DNA-templated	BP	3243	38	4.80359e-10	Bdnf, Btg2, Egr1, Egr2, Egr4, Fos, Fosb, Fosl2, Nr4a1, Hr, Ccn1, Junb, Klf2, Mxd1, Sik1, Ppp1r15a, Nr4a3, Nr4a2, Nobox, Polr1c, Srf, Tgif1, Taf10, Bag3, Siva1, Usp2, Ddx20, Sertad1, Myoz1, Bambi, Taf11, Mlip, Spty2d1, Hinfp, Actr5, Arid5a, Npas4, Leo1
GO:0097659	nucleic acid-templated transcription	BP	3250	38	5.10911e-10	Bdnf, Btg2, Egr1, Egr2, Egr4, Fos, Fosb, Fosl2, Nr4a1, Hr, Ccn1, Junb, Klf2, Mxd1, Sik1, Ppp1r15a, Nr4a3, Nr4a2, Nobox, Polr1c, Srf, Tgif1, Taf10, Bag3, Siva1, Usp2, Ddx20, Sertad1, Myoz1, Bambi, Taf11, Mlip, Spty2d1, Hinfp, Actr5, Arid5a, Npas4, Leo1
GO:0032774	RNA biosynthetic process	BP	3258	38	5.48091e-10	Bdnf, Btg2, Egr1, Egr2, Egr4, Fos, Fosb, Fosl2, Nr4a1, Hr, Ccn1, Junb, Klf2, Mxd1, Sik1, Ppp1r15a, Nr4a3, Nr4a2, Nobox, Polr1c, Srf, Tgif1, Taf10, Bag3, Siva1, Usp2, Ddx20, Sertad1, Myoz1, Bambi, Taf11, Mlip, Spty2d1, Hinfp, Actr5, Arid5a, Npas4, Leo1
GO:1901362	organic cyclic compound biosynthetic process	BP	3818	41	1.0691e-09	Bdnf, Btg2, Egr1, Egr2, Egr4, Fos, Fosb, Fosl2, Nr4a1, Hr, Ccn1, Junb, Klf2, Mxd1, Mapkapk5, Sik1, Ppp1r15a, Nr4a3, Nr4a2, Nobox, Polr1c, Srf, Tgif1, Impdh2, Taf10, Bag3, Siva1, Usp2, Ddx20, Sertad1, Myoz1, Bambi, Taf11, Mlip, Spty2d1, Hinfp, Actr5, Arid5a, Npas4, Leo1, Acd
GO:0019219	regulation of nucleobase-containing compound metabolic pr...	BP	3669	40	1.19762e-09	Bdnf, Btg2, Cdk11b, Egr1, Egr2, Egr4, Fos, Fosb, Fosl2, Nr4a1, Hr, Ccn1, Junb, Klf2, Mxd1, Mapkapk5, Sik1, Ppp1r15a, Nr4a3, Nr4a2, Nobox, Srf, Tgif1, Taf10, Bag3, Siva1, Usp2, Ddx20, Sertad1, Myoz1, Bambi, Mlip, Tra2a, Spty2d1, Hinfp, Actr5, Arid5a, Npas4, Leo1, Acd
GO:0080090	regulation of primary metabolic process	BP	5645	51	1.76633e-09	Bdnf, Btg2, Cdk11b, Egr1, Egr2, Egr4, Fos, Fosb, Fosl2, Gapdh, Nr4a1, Hr, Ccn1, Junb, Klf2, Rps2, Mxd1, Mapkapk5, Sik1, Ppp1r15a, Nr4a3, Nr4a2, Nobox, Ptgs2, Rgs2, Plk2, Srf, Tgif1, Gadd45g, Taf10, Bag3, Siva1, Usp2, Ppp1r3c, Ddx20, Sertad1, Rassf1, Pard6a, Myoz1, Bambi, Mlip, Tiparp, Tra2a, Spty2d1, Hinfp, Eprs, Actr5, Arid5a, Npas4, Leo1, Acd
GO:0031323	regulation of cellular metabolic process	BP	5853	52	2.00784e-09	Ap2m1, Bdnf, Btg2, Cdk11b, Egr1, Egr2, Egr4, Fos, Fosb, Fosl2, Gapdh, Nr4a1, Hr, Ccn1, Junb, Klf2, Rps2, Mxd1, Mapkapk5, Sik1, Ppp1r15a, Nr4a3, Nr4a2, Nobox, Ptgs2, Rgs2, Plk2, Srf, Tgif1, Gadd45g, Taf10, Bag3, Siva1, Usp2, Ppp1r3c, Ddx20, Sertad1, Rassf1, Pard6a, Myoz1, Bambi, Mlip, Tra2a, Spty2d1, Hinfp, Ppif, Eprs, Actr5, Arid5a, Npas4, Leo1, Acd
GO:0051171	regulation of nitrogen compound metabolic process	BP	5481	50	2.02495e-09	Bdnf, Btg2, Cdk11b, Egr1, Egr2, Egr4, Fos, Fosb, Fosl2, Gapdh, Nr4a1, Hr, Ccn1, Junb, Klf2, Rps2, Mxd1, Mapkapk5, Sik1, Ppp1r15a, Nr4a3, Nr4a2, Nobox, Ptgs2, Rgs2, Plk2, Srf, Tgif1, Gadd45g, Taf10, Bag3, Siva1, Usp2, Ddx20, Sertad1, Rassf1, Pard6a, Myoz1, Bambi, Mlip, Tiparp, Tra2a, Spty2d1, Hinfp, Eprs, Actr5, Arid5a, Npas4, Leo1, Acd
GO:0051252	regulation of RNA metabolic process	BP	3425	38	2.25359e-09	Bdnf, Btg2, Cdk11b, Egr1, Egr2, Egr4, Fos, Fosb, Fosl2, Nr4a1, Hr, Ccn1, Junb, Klf2, Mxd1, Sik1, Ppp1r15a, Nr4a3, Nr4a2, Nobox, Srf, Tgif1, Taf10, Bag3, Siva1, Usp2, Ddx20, Sertad1, Myoz1, Bambi, Mlip, Tra2a, Spty2d1, Hinfp, Actr5, Arid5a, Npas4, Leo1
GO:0071840	cellular component organization or biogenesis	BP	6102	53	2.87343e-09	Ap2m1, Bdnf, Btg2, Cdk11b, Cenpa, Dclk1, Egr2, Gapdh, Gem, Hr, Ccn1, Rps2, Mapkapk5, Ppp1r15a, Nr4a3, Nr4a2, Pcdh8, Ptma, Rgs2, Rps17, Plk2, Srf, Surf6, Zyx, Taf10, Nubp2, Rpl7a, Bag3, Siva1, Ddx20, Sertad1, Rassf1, Pard6a, Myoz1, Nip7, Atg12, Nop9, Taf11, Ndel1, Spty2d1, Ppif, Wdr74, Actr5, Ggct, Utp14b, Tbl3, Arid5a, Rhot2, Dhx8, Npas4, Leo1, Tpm4, Acd
GO:0006355	regulation of transcription, DNA-templated	BP	3149	36	3.14045e-09	Bdnf, Btg2, Egr1, Egr2, Egr4, Fos, Fosb, Fosl2, Nr4a1, Hr, Ccn1, Junb, Klf2, Mxd1, Sik1, Ppp1r15a, Nr4a3, Nr4a2, Nobox, Srf, Tgif1, Taf10, Bag3, Siva1, Usp2, Ddx20, Sertad1, Myoz1, Bambi, Mlip, Spty2d1, Hinfp, Actr5, Arid5a, Npas4, Leo1
GO:1903506	regulation of nucleic acid-templated transcription	BP	3156	36	3.33224e-09	Bdnf, Btg2, Egr1, Egr2, Egr4, Fos, Fosb, Fosl2, Nr4a1, Hr, Ccn1, Junb, Klf2, Mxd1, Sik1, Ppp1r15a, Nr4a3, Nr4a2, Nobox, Srf, Tgif1, Taf10, Bag3, Siva1, Usp2, Ddx20, Sertad1, Myoz1, Bambi, Mlip, Spty2d1, Hinfp, Actr5, Arid5a, Npas4, Leo1
GO:0003677	DNA binding	MF	2264	30	3.35229e-09	Cenpa, Egr1, Egr2, Egr4, Fos, Fosb, Fosl2, Nr4a1, Hr, Junb, Klf2, Mxd1, Nr4a3, Nr4a2, Nobox, Polr1c, Srf, Surf6, Tgif1, Impdh2, Taf10, Ddx20, Taf11, Tfpt, Tiparp, Spty2d1, Hinfp, Arid5a, Npas4, Acd
GO:0043232	intracellular non-membrane-bounded organelle	CC	4482	44	3.40041e-09	Cenpa, Egr1, Egr2, Egr4, Gapdh, Gem, Hr, Junb, Klf2, Rps2, Mxd1, Mapkapk5, Polr1c, Rps17, Plk2, Srf, Surf6, Tgif1, Tpt1, Zyx, Nubp2, Rpl7a, Bag3, Usp2, Rassf1, Pard6a, Myoz1, Nip7, Rpl37, Nop9, Rpl22l1, Tfpt, Ndel1, Tra2a, Spty2d1, Wdr74, Actr5, Utp14b, Tbl3, Arid5a, Npas4, Leo1, Tpm4, Acd
GO:2001141	regulation of RNA biosynthetic process	BP	3159	36	3.41779e-09	Bdnf, Btg2, Egr1, Egr2, Egr4, Fos, Fosb, Fosl2, Nr4a1, Hr, Ccn1, Junb, Klf2, Mxd1, Sik1, Ppp1r15a, Nr4a3, Nr4a2, Nobox, Srf, Tgif1, Taf10, Bag3, Siva1, Usp2, Ddx20, Sertad1, Myoz1, Bambi, Mlip, Spty2d1, Hinfp, Actr5, Arid5a, Npas4, Leo1
GO:0043228	non-membrane-bounded organelle	CC	4500	44	3.8539e-09	Cenpa, Egr1, Egr2, Egr4, Gapdh, Gem, Hr, Junb, Klf2, Rps2, Mxd1, Mapkapk5, Polr1c, Rps17, Plk2, Srf, Surf6, Tgif1, Tpt1, Zyx, Nubp2, Rpl7a, Bag3, Usp2, Rassf1, Pard6a, Myoz1, Nip7, Rpl37, Nop9, Rpl22l1, Tfpt, Ndel1, Tra2a, Spty2d1, Wdr74, Actr5, Utp14b, Tbl3, Arid5a, Npas4, Leo1, Tpm4, Acd
GO:0032991	protein-containing complex	CC	5259	48	5.12761e-09	Ap2m1, Cenpa, Fos, Gapdh, Nr4a1, Hr, Junb, Rps2, Mapkapk5, Ppp1r15a, Nr4a3, Nr4a2, Nobox, Ptgs2, Polr1c, Rps17, Taf10, Rpl7a, Bag3, Ppp1r3c, Ddx20, Pard6a, Nip7, Atp5md, Snrnp40, Rpl37, Cwc25, Atg12, Nop9, Taf11, Tfpt, Fbxo33, Ndel1, Cnnm4, Tra2a, Ppif, Wdr74, Eprs, Actr5, Ube2j2, Utp14b, Tbl3, Arid5a, Dhx8, Npas4, Leo1, Vps37b, Acd
GO:0010468	regulation of gene expression	BP	4576	44	6.48542e-09	Bdnf, Btg2, Cdk11b, Egr1, Egr2, Egr4, Fos, Fosb, Fosl2, Gapdh, Nr4a1, Hr, Ccn1, Junb, Klf2, Mxd1, Mapkapk5, Sik1, Ppp1r15a, Nr4a3, Nr4a2, Nobox, Ptgs2, Rgs2, Srf, Tgif1, Taf10, Bag3, Siva1, Usp2, Ddx20, Sertad1, Myoz1, Bambi, Mlip, Tiparp, Tra2a, Spty2d1, Hinfp, Eprs, Actr5, Arid5a, Npas4, Leo1
GO:0006357	regulation of transcription by RNA polymerase II	BP	2349	30	7.82994e-09	Btg2, Egr1, Egr2, Egr4, Fos, Fosb, Fosl2, Nr4a1, Hr, Ccn1, Junb, Klf2, Mxd1, Sik1, Ppp1r15a, Nr4a3, Nr4a2, Nobox, Srf, Tgif1, Bag3, Usp2, Ddx20, Sertad1, Myoz1, Mlip, Hinfp, Arid5a, Npas4, Leo1
GO:0009888	tissue development	BP	1934	27	8.17869e-09	Bdnf, Btg2, Egr1, Egr2, Fos, Fosl2, Nr4a1, Ccn1, Junb, Klf2, Sik1, Nr4a3, Pcdh8, Ptgs2, Rgs2, Srf, Tgif1, Tpt1, Taf10, Usp2, Myoz1, Bambi, Cnnm4, Tiparp, Arid5a, Leo1, Apold1
GO:0060255	regulation of macromolecule metabolic process	BP	6102	52	8.89331e-09	Ap2m1, Bdnf, Btg2, Cdk11b, Egr1, Egr2, Egr4, Fos, Fosb, Fosl2, Gapdh, Nr4a1, Hr, Ccn1, Junb, Klf2, Rps2, Mxd1, Mapkapk5, Sik1, Ppp1r15a, Nr4a3, Nr4a2, Nobox, Ptgs2, Rgs2, Plk2, Srf, Tgif1, Gadd45g, Taf10, Bag3, Siva1, Usp2, Ppp1r3c, Ddx20, Sertad1, Rassf1, Pard6a, Myoz1, Bambi, Mlip, Tiparp, Tra2a, Spty2d1, Hinfp, Eprs, Actr5, Arid5a, Npas4, Leo1, Acd
GO:0140297	DNA-binding transcription factor binding	MF	364	12	2.59158e-08	Egr2, Fos, Nr4a1, Hr, Sik1, Nr4a3, Nr4a2, Srf, Taf10, Ddx20, Taf11, Arid5a
GO:0033554	cellular response to stress	BP	1784	25	3.02152e-08	Btg2, Egr1, Fos, Klf2, Mapkapk5, Sik1, Ppp1r15a, Nr4a3, Nr4a2, Ptgs2, Plk2, Srf, Tpt1, Gadd45g, Tbl2, Bag3, Rassf1, Tfpt, Ndel1, Hinfp, Ppif, Actr5, Ube2j2, Npas4, Acd
GO:0001228	DNA-binding transcription activator activity, RNA polymer...	MF	535	14	3.07442e-08	Egr1, Egr2, Egr4, Fos, Fosb, Fosl2, Nr4a1, Junb, Nr4a3, Nr4a2, Nobox, Srf, Hinfp, Npas4
GO:0001216	DNA-binding transcription activator activity	MF	538	14	3.29502e-08	Egr1, Egr2, Egr4, Fos, Fosb, Fosl2, Nr4a1, Junb, Nr4a3, Nr4a2, Nobox, Srf, Hinfp, Npas4
GO:0019222	regulation of metabolic process	BP	6583	53	4.31711e-08	Ap2m1, Bdnf, Btg2, Cdk11b, Egr1, Egr2, Egr4, Fos, Fosb, Fosl2, Gapdh, Nr4a1, Hr, Ccn1, Junb, Klf2, Rps2, Mxd1, Mapkapk5, Sik1, Ppp1r15a, Nr4a3, Nr4a2, Nobox, Ptgs2, Rgs2, Plk2, Srf, Tgif1, Gadd45g, Taf10, Bag3, Siva1, Usp2, Ppp1r3c, Ddx20, Sertad1, Rassf1, Pard6a, Myoz1, Bambi, Mlip, Tiparp, Tra2a, Spty2d1, Hinfp, Ppif, Eprs, Actr5, Arid5a, Npas4, Leo1, Acd
GO:0045935	positive regulation of nucleobase-containing compound met...	BP	1822	25	4.54826e-08	Btg2, Egr1, Egr2, Egr4, Fos, Fosb, Fosl2, Nr4a1, Ccn1, Junb, Klf2, Mapkapk5, Ppp1r15a, Nr4a3, Nr4a2, Nobox, Srf, Sertad1, Bambi, Tra2a, Hinfp, Arid5a, Npas4, Leo1, Acd
GO:2000113	negative regulation of cellular macromolecule biosyntheti...	BP	1472	22	7.67846e-08	Btg2, Egr1, Gapdh, Hr, Klf2, Mxd1, Sik1, Ppp1r15a, Nr4a3, Nr4a2, Rgs2, Srf, Tgif1, Bag3, Usp2, Ddx20, Myoz1, Mlip, Hinfp, Eprs, Arid5a, Acd
GO:0140110	transcription regulator activity	MF	1744	24	8.40528e-08	Btg2, Egr1, Egr2, Egr4, Fos, Fosb, Fosl2, Nr4a1, Hr, Junb, Klf2, Mxd1, Nr4a3, Nr4a2, Nobox, Srf, Tgif1, Taf10, Sertad1, Taf11, Mlip, Hinfp, Arid5a, Npas4
GO:0010558	negative regulation of macromolecule biosynthetic process	BP	1492	22	9.70495e-08	Btg2, Egr1, Gapdh, Hr, Klf2, Mxd1, Sik1, Ppp1r15a, Nr4a3, Nr4a2, Rgs2, Srf, Tgif1, Bag3, Usp2, Ddx20, Myoz1, Mlip, Hinfp, Eprs, Arid5a, Acd
GO:0006950	response to stress	BP	3599	36	1.00739e-07	Bdnf, Btg2, Egr1, Fos, Fosl2, Gapdh, Ccn1, Klf2, Mapkapk5, Sik1, Ppp1r15a, Nr4a3, Nr4a2, Ptgs2, Plk2, Srf, Tpt1, Zyx, Gadd45g, Tbl2, Bag3, Rassf1, Myoz1, Mlip, Tfpt, C2cd4b, Ndel1, Hinfp, Ppif, Eprs, Actr5, Ube2j2, Arid5a, Npas4, Acd, Gbp11
GO:0008134	transcription factor binding	MF	696	15	1.20904e-07	Egr1, Egr2, Fos, Nr4a1, Hr, Junb, Sik1, Nr4a3, Nr4a2, Srf, Tpt1, Taf10, Ddx20, Taf11, Arid5a
GO:0051254	positive regulation of RNA metabolic process	BP	1654	23	1.35919e-07	Btg2, Egr1, Egr2, Egr4, Fos, Fosb, Fosl2, Nr4a1, Ccn1, Junb, Klf2, Ppp1r15a, Nr4a3, Nr4a2, Nobox, Srf, Sertad1, Bambi, Tra2a, Hinfp, Arid5a, Npas4, Leo1
GO:0000122	negative regulation of transcription by RNA polymerase II	BP	921	17	1.49823e-07	Btg2, Egr1, Klf2, Mxd1, Sik1, Ppp1r15a, Nr4a3, Nr4a2, Srf, Tgif1, Bag3, Usp2, Ddx20, Myoz1, Mlip, Hinfp, Arid5a
GO:0031327	negative regulation of cellular biosynthetic process	BP	1546	22	1.79063e-07	Btg2, Egr1, Gapdh, Hr, Klf2, Mxd1, Sik1, Ppp1r15a, Nr4a3, Nr4a2, Rgs2, Srf, Tgif1, Bag3, Usp2, Ddx20, Myoz1, Mlip, Hinfp, Eprs, Arid5a, Acd
GO:0061629	RNA polymerase II-specific DNA-binding transcription fact...	MF	284	10	2.16384e-07	Egr2, Fos, Nr4a1, Hr, Nr4a3, Nr4a2, Srf, Taf10, Taf11, Arid5a
GO:0071376	cellular response to corticotropin-releasing hormone stim...	BP	4	3	2.43627e-07	Nr4a1, Nr4a3, Nr4a2
GO:0043435	response to corticotropin-releasing hormone	BP	4	3	2.43627e-07	Nr4a1, Nr4a3, Nr4a2
GO:0000987	cis-regulatory region sequence-specific DNA binding	MF	1070	18	2.45448e-07	Egr1, Egr2, Egr4, Fos, Fosb, Fosl2, Nr4a1, Junb, Klf2, Mxd1, Nr4a3, Nr4a2, Nobox, Srf, Tgif1, Tiparp, Hinfp, Npas4
GO:0051173	positive regulation of nitrogen compound metabolic proces...	BP	3077	32	2.73164e-07	Bdnf, Btg2, Egr1, Egr2, Egr4, Fos, Fosb, Fosl2, Nr4a1, Ccn1, Junb, Klf2, Rps2, Mapkapk5, Ppp1r15a, Nr4a3, Nr4a2, Nobox, Ptgs2, Plk2, Srf, Gadd45g, Sertad1, Rassf1, Bambi, Tiparp, Tra2a, Hinfp, Arid5a, Npas4, Leo1, Acd
GO:0009890	negative regulation of biosynthetic process	BP	1588	22	2.82894e-07	Btg2, Egr1, Gapdh, Hr, Klf2, Mxd1, Sik1, Ppp1r15a, Nr4a3, Nr4a2, Rgs2, Srf, Tgif1, Bag3, Usp2, Ddx20, Myoz1, Mlip, Hinfp, Eprs, Arid5a, Acd
GO:0010604	positive regulation of macromolecule metabolic process	BP	3445	34	3.54928e-07	Ap2m1, Bdnf, Btg2, Egr1, Egr2, Egr4, Fos, Fosb, Fosl2, Gapdh, Nr4a1, Ccn1, Junb, Klf2, Rps2, Mapkapk5, Ppp1r15a, Nr4a3, Nr4a2, Nobox, Ptgs2, Plk2, Srf, Gadd45g, Sertad1, Rassf1, Bambi, Tiparp, Tra2a, Hinfp, Arid5a, Npas4, Leo1, Acd
GO:1990904	ribonucleoprotein complex	CC	758	15	3.58532e-07	Gapdh, Rps2, Rps17, Rpl7a, Nip7, Snrnp40, Rpl37, Cwc25, Nop9, Tra2a, Wdr74, Eprs, Utp14b, Tbl3, Dhx8
GO:0031328	positive regulation of cellular biosynthetic process	BP	1889	24	3.62659e-07	Egr1, Egr2, Egr4, Fos, Fosb, Fosl2, Nr4a1, Ccn1, Junb, Klf2, Mapkapk5, Ppp1r15a, Nr4a3, Nr4a2, Nobox, Ptgs2, Srf, Sertad1, Bambi, Hinfp, Arid5a, Npas4, Leo1, Acd
GO:0060537	muscle tissue development	BP	466	12	3.72517e-07	Bdnf, Btg2, Egr1, Egr2, Fos, Nr4a1, Sik1, Rgs2, Srf, Usp2, Myoz1, Tiparp
GO:0031325	positive regulation of cellular metabolic process	BP	3288	33	3.81003e-07	Ap2m1, Bdnf, Btg2, Egr1, Egr2, Egr4, Fos, Fosb, Fosl2, Nr4a1, Ccn1, Junb, Klf2, Rps2, Mapkapk5, Ppp1r15a, Nr4a3, Nr4a2, Nobox, Ptgs2, Plk2, Srf, Gadd45g, Bag3, Sertad1, Rassf1, Bambi, Tra2a, Hinfp, Arid5a, Npas4, Leo1, Acd
GO:0045944	positive regulation of transcription by RNA polymerase II	BP	1250	19	5.14545e-07	Egr1, Egr2, Egr4, Fos, Fosb, Fosl2, Nr4a1, Ccn1, Junb, Klf2, Nr4a3, Nr4a2, Nobox, Srf, Sertad1, Hinfp, Arid5a, Npas4, Leo1
GO:0010557	positive regulation of macromolecule biosynthetic process	BP	1786	23	5.24426e-07	Egr1, Egr2, Egr4, Fos, Fosb, Fosl2, Nr4a1, Ccn1, Junb, Klf2, Mapkapk5, Ppp1r15a, Nr4a3, Nr4a2, Nobox, Srf, Sertad1, Bambi, Hinfp, Arid5a, Npas4, Leo1, Acd
GO:0009891	positive regulation of biosynthetic process	BP	1933	24	5.4862e-07	Egr1, Egr2, Egr4, Fos, Fosb, Fosl2, Nr4a1, Ccn1, Junb, Klf2, Mapkapk5, Ppp1r15a, Nr4a3, Nr4a2, Nobox, Ptgs2, Srf, Sertad1, Bambi, Hinfp, Arid5a, Npas4, Leo1, Acd
GO:0016043	cellular component organization	BP	5914	47	6.1612e-07	Ap2m1, Bdnf, Btg2, Cdk11b, Cenpa, Dclk1, Egr2, Gapdh, Gem, Hr, Ccn1, Rps2, Mapkapk5, Ppp1r15a, Nr4a3, Nr4a2, Pcdh8, Ptma, Rgs2, Plk2, Srf, Surf6, Zyx, Taf10, Nubp2, Bag3, Siva1, Ddx20, Sertad1, Rassf1, Pard6a, Myoz1, Nip7, Atg12, Taf11, Ndel1, Spty2d1, Ppif, Actr5, Ggct, Arid5a, Rhot2, Dhx8, Npas4, Leo1, Tpm4, Acd
GO:0045893	positive regulation of transcription, DNA-templated	BP	1549	21	7.77849e-07	Egr1, Egr2, Egr4, Fos, Fosb, Fosl2, Nr4a1, Ccn1, Junb, Klf2, Ppp1r15a, Nr4a3, Nr4a2, Nobox, Srf, Sertad1, Bambi, Hinfp, Arid5a, Npas4, Leo1
GO:1903508	positive regulation of nucleic acid-templated transcripti...	BP	1552	21	8.02421e-07	Egr1, Egr2, Egr4, Fos, Fosb, Fosl2, Nr4a1, Ccn1, Junb, Klf2, Ppp1r15a, Nr4a3, Nr4a2, Nobox, Srf, Sertad1, Bambi, Hinfp, Arid5a, Npas4, Leo1
GO:1902680	positive regulation of RNA biosynthetic process	BP	1553	21	8.10768e-07	Egr1, Egr2, Egr4, Fos, Fosb, Fosl2, Nr4a1, Ccn1, Junb, Klf2, Ppp1r15a, Nr4a3, Nr4a2, Nobox, Srf, Sertad1, Bambi, Hinfp, Arid5a, Npas4, Leo1
GO:0000978	RNA polymerase II cis-regulatory region sequence-specific...	MF	1045	17	8.67168e-07	Egr1, Egr2, Egr4, Fos, Fosb, Fosl2, Nr4a1, Junb, Klf2, Mxd1, Nr4a3, Nr4a2, Nobox, Srf, Tgif1, Hinfp, Npas4
GO:0009893	positive regulation of metabolic process	BP	3756	35	8.8484e-07	Ap2m1, Bdnf, Btg2, Egr1, Egr2, Egr4, Fos, Fosb, Fosl2, Gapdh, Nr4a1, Ccn1, Junb, Klf2, Rps2, Mapkapk5, Ppp1r15a, Nr4a3, Nr4a2, Nobox, Ptgs2, Plk2, Srf, Gadd45g, Bag3, Sertad1, Rassf1, Bambi, Tiparp, Tra2a, Hinfp, Arid5a, Npas4, Leo1, Acd
GO:0006915	apoptotic process	BP	1848	23	9.44755e-07	Bdnf, Btg2, Cdk11b, Egr1, Gapdh, Nr4a1, Ccn1, Sik1, Ppp1r15a, Nr4a3, Nr4a2, Ptgs2, Plk2, Tpt1, Gadd45g, Taf10, Bag3, Siva1, Ddx20, Tfpt, Ppif, Ggct, Rhot2
GO:0048523	negative regulation of cellular process	BP	4888	41	1.16759e-06	Ap2m1, Bdnf, Btg2, Cdk11b, Dclk1, Egr1, Gapdh, Gem, Nr4a1, Hr, Ccn1, Klf2, Mxd1, Mapkapk5, Sik1, Ppp1r15a, Nr4a3, Nr4a2, Ptgs2, Rgs2, Plk2, Srf, Tgif1, Tpt1, Gadd45g, Bag3, Usp2, Ddx20, Sertad1, Rassf1, Pard6a, Myoz1, Bambi, Mlip, Hinfp, Ppif, Eprs, Rem2, Arid5a, Leo1, Acd
GO:0098772	molecular function regulator	MF	3478	33	1.35626e-06	Bdnf, Btg2, Egr1, Egr2, Egr4, Fos, Fosb, Fosl2, Gapdh, Gem, Nr4a1, Hr, Junb, Klf2, Mxd1, Ppp1r15a, Nr4a3, Nr4a2, Nobox, Rgs2, Srf, Tgif1, Taf10, Bag3, Ppp1r3c, Sertad1, Myoz1, Taf11, Mlip, Hinfp, Rem2, Arid5a, Npas4
GO:0012501	programmed cell death	BP	1894	23	1.43717e-06	Bdnf, Btg2, Cdk11b, Egr1, Gapdh, Nr4a1, Ccn1, Sik1, Ppp1r15a, Nr4a3, Nr4a2, Ptgs2, Plk2, Tpt1, Gadd45g, Taf10, Bag3, Siva1, Ddx20, Tfpt, Ppif, Ggct, Rhot2
GO:0014706	striated muscle tissue development	BP	443	11	1.66091e-06	Bdnf, Btg2, Egr1, Egr2, Fos, Nr4a1, Sik1, Rgs2, Srf, Usp2, Myoz1
GO:0051172	negative regulation of nitrogen compound metabolic proces...	BP	2364	26	1.68421e-06	Btg2, Egr1, Gapdh, Nr4a1, Hr, Klf2, Mxd1, Sik1, Ppp1r15a, Nr4a3, Nr4a2, Ptgs2, Rgs2, Srf, Tgif1, Gadd45g, Bag3, Usp2, Ddx20, Pard6a, Myoz1, Mlip, Hinfp, Eprs, Arid5a, Acd
GO:0008219	cell death	BP	2064	24	1.74864e-06	Bdnf, Btg2, Cdk11b, Egr1, Fos, Gapdh, Nr4a1, Ccn1, Sik1, Ppp1r15a, Nr4a3, Nr4a2, Ptgs2, Plk2, Tpt1, Gadd45g, Taf10, Bag3, Siva1, Ddx20, Tfpt, Ppif, Ggct, Rhot2
GO:0005667	transcription regulator complex	CC	455	11	2.14847e-06	Fos, Nr4a1, Junb, Nr4a3, Nr4a2, Nobox, Taf10, Ddx20, Taf11, Arid5a, Npas4
GO:0048519	negative regulation of biological process	BP	5395	43	2.25569e-06	Ap2m1, Bdnf, Btg2, Cdk11b, Dclk1, Egr1, Gapdh, Gem, Nr4a1, Hr, Ccn1, Klf2, Mxd1, Mapkapk5, Sik1, Ppp1r15a, Nr4a3, Nr4a2, Ptgs2, Rgs2, Plk2, Srf, Tgif1, Tpt1, Gadd45g, Bag3, Siva1, Usp2, Ddx20, Sertad1, Rassf1, Pard6a, Myoz1, Bambi, Mlip, Tiparp, Hinfp, Ppif, Eprs, Rem2, Arid5a, Leo1, Acd
GO:0048518	positive regulation of biological process	BP	6183	47	2.27753e-06	Ap2m1, Bdnf, Btg2, Egr1, Egr2, Egr4, Fos, Fosb, Fosl2, Gapdh, Nr4a1, Ccn1, Junb, Klf2, Rps2, Mapkapk5, Ppp1r15a, Nr4a3, Nr4a2, Nobox, Ptgs2, Rgs2, Plk2, Srf, Tgif1, Gadd45g, Bag3, Siva1, Usp2, Ddx20, Sertad1, Rassf1, Pard6a, Bambi, Taf11, Tfpt, C2cd4b, Ndel1, Tiparp, Tra2a, Hinfp, Ppif, Arid5a, Npas4, Leo1, Vps37b, Acd
GO:0031324	negative regulation of cellular metabolic process	BP	2565	27	2.34918e-06	Btg2, Egr1, Gapdh, Nr4a1, Hr, Klf2, Mxd1, Sik1, Ppp1r15a, Nr4a3, Nr4a2, Ptgs2, Rgs2, Srf, Tgif1, Gadd45g, Bag3, Usp2, Ddx20, Pard6a, Myoz1, Mlip, Hinfp, Ppif, Eprs, Arid5a, Acd
GO:0000976	transcription regulatory region sequence-specific DNA bin...	MF	1386	19	2.37333e-06	Egr1, Egr2, Egr4, Fos, Fosb, Fosl2, Nr4a1, Junb, Klf2, Mxd1, Nr4a3, Nr4a2, Nobox, Srf, Tgif1, Tiparp, Hinfp, Arid5a, Npas4
GO:0001067	regulatory region nucleic acid binding	MF	1390	19	2.475e-06	Egr1, Egr2, Egr4, Fos, Fosb, Fosl2, Nr4a1, Junb, Klf2, Mxd1, Nr4a3, Nr4a2, Nobox, Srf, Tgif1, Tiparp, Hinfp, Arid5a, Npas4
GO:0035257	nuclear hormone receptor binding	MF	152	7	2.6324e-06	Nr4a1, Hr, Nr4a3, Nr4a2, Taf10, Taf11, Arid5a
GO:0042254	ribosome biogenesis	BP	293	9	2.75317e-06	Rps2, Rps17, Surf6, Rpl7a, Nip7, Nop9, Wdr74, Utp14b, Tbl3
GO:0045892	negative regulation of transcription, DNA-templated	BP	1273	18	2.93391e-06	Btg2, Egr1, Hr, Klf2, Mxd1, Sik1, Ppp1r15a, Nr4a3, Nr4a2, Srf, Tgif1, Bag3, Usp2, Ddx20, Myoz1, Mlip, Hinfp, Arid5a
GO:1903507	negative regulation of nucleic acid-templated transcripti...	BP	1277	18	3.0648e-06	Btg2, Egr1, Hr, Klf2, Mxd1, Sik1, Ppp1r15a, Nr4a3, Nr4a2, Srf, Tgif1, Bag3, Usp2, Ddx20, Myoz1, Mlip, Hinfp, Arid5a
GO:1902679	negative regulation of RNA biosynthetic process	BP	1278	18	3.09834e-06	Btg2, Egr1, Hr, Klf2, Mxd1, Sik1, Ppp1r15a, Nr4a3, Nr4a2, Srf, Tgif1, Bag3, Usp2, Ddx20, Myoz1, Mlip, Hinfp, Arid5a
GO:0043565	sequence-specific DNA binding	MF	1581	20	4.20216e-06	Egr1, Egr2, Egr4, Fos, Fosb, Fosl2, Nr4a1, Junb, Klf2, Mxd1, Nr4a3, Nr4a2, Nobox, Srf, Tgif1, Tiparp, Hinfp, Arid5a, Npas4, Acd
GO:0061061	muscle structure development	BP	699	13	4.45795e-06	Bdnf, Btg2, Egr1, Egr2, Fos, Nr4a1, Sik1, Rgs2, Srf, Usp2, Myoz1, Unc45a, Hinfp
GO:0007275	multicellular organism development	BP	5345	42	4.56937e-06	Amd1, Bdnf, Btg2, Cdk11b, Dclk1, Egr1, Egr2, Fos, Fosl2, Gapdh, Nr4a1, Ccn1, Junb, Klf2, Mapkapk5, Sik1, Nr4a3, Nr4a2, Nobox, Pcdh8, Ptgs2, Rgs2, Plk2, Srf, Tgif1, Gadd45g, Taf10, Usp2, Myoz1, Bambi, Ndel1, Cnnm4, Tiparp, Unc45a, Hinfp, Wdr74, Utp14b, Arid5a, Npas4, Leo1, Apold1, Acd
GO:1990837	sequence-specific double-stranded DNA binding	MF	1466	19	5.33238e-06	Egr1, Egr2, Egr4, Fos, Fosb, Fosl2, Nr4a1, Junb, Klf2, Mxd1, Nr4a3, Nr4a2, Nobox, Srf, Tgif1, Tiparp, Hinfp, Arid5a, Npas4
GO:0022613	ribonucleoprotein complex biogenesis	BP	406	10	5.39871e-06	Rps2, Rps17, Surf6, Rpl7a, Ddx20, Nip7, Nop9, Wdr74, Utp14b, Tbl3
GO:0045934	negative regulation of nucleobase-containing compound met...	BP	1479	19	6.04798e-06	Btg2, Egr1, Hr, Klf2, Mxd1, Sik1, Ppp1r15a, Nr4a3, Nr4a2, Srf, Tgif1, Bag3, Usp2, Ddx20, Myoz1, Mlip, Hinfp, Arid5a, Acd
GO:0000981	DNA-binding transcription factor activity, RNA polymerase...	MF	1212	17	6.31879e-06	Egr1, Egr2, Egr4, Fos, Fosb, Fosl2, Nr4a1, Junb, Klf2, Mxd1, Nr4a3, Nr4a2, Nobox, Srf, Tgif1, Hinfp, Npas4
GO:0051716	cellular response to stimulus	BP	7665	53	6.54405e-06	Bdnf, Btg2, Cdk11b, Dclk1, Egr1, Egr2, Fos, Fosb, Gapdh, Gem, Nr4a1, Ccn1, Junb, Klf2, Rps2, Mapkapk5, Sik1, Ppp1r15a, Nr4a3, Nr4a2, Ptgs2, Rgs2, Plk2, Srf, Tgif1, Tpt1, Zyx, Gadd45g, Impdh2, Tbl2, Bag3, Siva1, Rassf1, Myoz1, Bambi, Tfpt, Ndel1, Tiparp, Hinfp, Ppif, Eprs, Actr5, Ggct, Ube2j2, Rem2, Arid5a, Rhot2, Npas4, Leo1, Gpr151, Olfr273, Acd, Gbp11
GO:0007517	muscle organ development	BP	416	10	6.67897e-06	Bdnf, Btg2, Egr1, Egr2, Fos, Nr4a1, Rgs2, Usp2, Myoz1, Unc45a
GO:0048856	anatomical structure development	BP	5826	44	6.92836e-06	Amd1, Bdnf, Btg2, Cdk11b, Dclk1, Egr1, Egr2, Fos, Fosl2, Gapdh, Nr4a1, Ccn1, Junb, Klf2, Mapkapk5, Sik1, Nr4a3, Nr4a2, Nobox, Pcdh8, Ptgs2, Rgs2, Plk2, Srf, Tgif1, Tpt1, Gadd45g, Taf10, Usp2, Ddx20, Myoz1, Bambi, Ndel1, Cnnm4, Tiparp, Unc45a, Hinfp, Wdr74, Utp14b, Arid5a, Npas4, Leo1, Apold1, Acd
GO:0048522	positive regulation of cellular process	BP	5666	43	8.24918e-06	Ap2m1, Bdnf, Btg2, Egr1, Egr2, Egr4, Fos, Fosb, Fosl2, Gapdh, Nr4a1, Ccn1, Junb, Klf2, Rps2, Mapkapk5, Ppp1r15a, Nr4a3, Nr4a2, Nobox, Ptgs2, Rgs2, Plk2, Srf, Tgif1, Gadd45g, Bag3, Siva1, Usp2, Ddx20, Sertad1, Rassf1, Pard6a, Bambi, Tfpt, Ndel1, Tra2a, Hinfp, Ppif, Arid5a, Npas4, Leo1, Acd
GO:0051427	hormone receptor binding	MF	181	7	8.31546e-06	Nr4a1, Hr, Nr4a3, Nr4a2, Taf10, Taf11, Arid5a
GO:0051253	negative regulation of RNA metabolic process	BP	1378	18	8.7174e-06	Btg2, Egr1, Hr, Klf2, Mxd1, Sik1, Ppp1r15a, Nr4a3, Nr4a2, Srf, Tgif1, Bag3, Usp2, Ddx20, Myoz1, Mlip, Hinfp, Arid5a
GO:0042274	ribosomal small subunit biogenesis	BP	72	5	1.02874e-05	Rps2, Rps17, Surf6, Nop9, Tbl3
GO:0003690	double-stranded DNA binding	MF	1546	19	1.13087e-05	Egr1, Egr2, Egr4, Fos, Fosb, Fosl2, Nr4a1, Junb, Klf2, Mxd1, Nr4a3, Nr4a2, Nobox, Srf, Tgif1, Tiparp, Hinfp, Arid5a, Npas4
GO:0010628	positive regulation of gene expression	BP	2303	24	1.13162e-05	Egr1, Egr2, Egr4, Fos, Fosb, Fosl2, Gapdh, Nr4a1, Ccn1, Junb, Klf2, Ppp1r15a, Nr4a3, Nr4a2, Nobox, Ptgs2, Srf, Sertad1, Bambi, Tra2a, Hinfp, Arid5a, Npas4, Leo1
GO:0010605	negative regulation of macromolecule metabolic process	BP	2795	27	1.15194e-05	Btg2, Egr1, Gapdh, Nr4a1, Hr, Klf2, Mxd1, Sik1, Ppp1r15a, Nr4a3, Nr4a2, Ptgs2, Rgs2, Srf, Tgif1, Gadd45g, Bag3, Usp2, Ddx20, Pard6a, Myoz1, Mlip, Tiparp, Hinfp, Eprs, Arid5a, Acd
GO:0030154	cell differentiation	BP	4213	35	1.20444e-05	Bdnf, Btg2, Dclk1, Egr1, Egr2, Fos, Fosl2, Nr4a1, Ccn1, Junb, Klf2, Mapkapk5, Sik1, Nr4a3, Nr4a2, Nobox, Ptgs2, Rgs2, Plk2, Srf, Tgif1, Gadd45g, Taf10, Ddx20, Myoz1, Bambi, Ndel1, Tiparp, Unc45a, Hinfp, Utp14b, Arid5a, Npas4, Leo1, Apold1
GO:0070887	cellular response to chemical stimulus	BP	2972	28	1.21646e-05	Bdnf, Egr1, Egr2, Fos, Fosb, Gapdh, Nr4a1, Ccn1, Junb, Klf2, Rps2, Ppp1r15a, Nr4a3, Nr4a2, Ptgs2, Srf, Zyx, Impdh2, Tbl2, Bag3, Bambi, Ndel1, Tiparp, Ppif, Eprs, Arid5a, Npas4, Gbp11
GO:0007519	skeletal muscle tissue development	BP	193	7	1.26245e-05	Btg2, Egr1, Egr2, Fos, Nr4a1, Usp2, Myoz1
GO:0006996	organelle organization	BP	3679	32	1.28296e-05	Ap2m1, Cdk11b, Cenpa, Gapdh, Gem, Hr, Rps2, Mapkapk5, Ptma, Plk2, Srf, Surf6, Zyx, Taf10, Bag3, Siva1, Sertad1, Rassf1, Pard6a, Myoz1, Nip7, Atg12, Ndel1, Spty2d1, Ppif, Actr5, Ggct, Arid5a, Rhot2, Leo1, Tpm4, Acd
GO:0000977	RNA polymerase II transcription regulatory region sequenc...	MF	1295	17	1.49066e-05	Egr1, Egr2, Egr4, Fos, Fosb, Fosl2, Nr4a1, Junb, Klf2, Mxd1, Nr4a3, Nr4a2, Nobox, Srf, Tgif1, Hinfp, Npas4
GO:0065007	biological regulation	BP	12465	73	1.49903e-05	Ap2m1, Bdnf, Btg2, Cdk11b, Dclk1, Slc29a2, Egr1, Egr2, Egr4, Fos, Fosb, Fosl2, Gapdh, Gem, Nr4a1, Hr, Ccn1, Junb, Klf2, Rps2, Mxd1, Mapkapk5, Sik1, Ppp1r15a, Nr4a3, Nr4a2, Nobox, Pcdh8, Ptgs2, Rgs2, Rps17, Plk2, Srf, Tgif1, Tpt1, Zyx, Gadd45g, Taf10, Tbl2, Bag3, Siva1, Usp2, Ppp1r3c, Ddx20, Sertad1, Rassf1, Pard6a, Myoz1, Bambi, Taf11, Mlip, Tfpt, C2cd4b, Ndel1, Cnnm4, Tiparp, Tra2a, Spty2d1, Hin…
GO:0000785	chromatin	CC	905	14	1.51505e-05	Cenpa, Egr1, Egr2, Egr4, Hr, Junb, Klf2, Mxd1, Plk2, Srf, Tgif1, Tfpt, Actr5, Npas4
GO:0010629	negative regulation of gene expression	BP	2032	22	1.55588e-05	Btg2, Egr1, Gapdh, Hr, Klf2, Mxd1, Sik1, Ppp1r15a, Nr4a3, Nr4a2, Rgs2, Srf, Tgif1, Bag3, Usp2, Ddx20, Myoz1, Mlip, Tiparp, Hinfp, Eprs, Arid5a
GO:0019899	enzyme binding	MF	2358	24	1.67146e-05	Egr1, Egr2, Gapdh, Hr, Rps2, Mapkapk5, Sik1, Ppp1r15a, Nr4a3, Ptgs2, Srf, Tgif1, Taf10, Tbl2, Usp2, Ppp1r3c, Ddx20, Pard6a, Tfpt, Hinfp, Eprs, Ube2j2, Leo1, Acd
GO:0030684	preribosome	CC	80	5	1.72336e-05	Nip7, Nop9, Wdr74, Utp14b, Tbl3
GO:0060538	skeletal muscle organ development	BP	203	7	1.74975e-05	Btg2, Egr1, Egr2, Fos, Nr4a1, Usp2, Myoz1
GO:0003700	DNA-binding transcription factor activity	MF	1318	17	1.86652e-05	Egr1, Egr2, Egr4, Fos, Fosb, Fosl2, Nr4a1, Junb, Klf2, Mxd1, Nr4a3, Nr4a2, Nobox, Srf, Tgif1, Hinfp, Npas4
GO:0048869	cellular developmental process	BP	4300	35	1.8793e-05	Bdnf, Btg2, Dclk1, Egr1, Egr2, Fos, Fosl2, Nr4a1, Ccn1, Junb, Klf2, Mapkapk5, Sik1, Nr4a3, Nr4a2, Nobox, Ptgs2, Rgs2, Plk2, Srf, Tgif1, Gadd45g, Taf10, Ddx20, Myoz1, Bambi, Ndel1, Tiparp, Unc45a, Hinfp, Utp14b, Arid5a, Npas4, Leo1, Apold1
GO:0048646	anatomical structure formation involved in morphogenesis	BP	1183	16	1.89338e-05	Egr2, Nr4a1, Ccn1, Junb, Klf2, Nr4a3, Pcdh8, Ptgs2, Plk2, Srf, Tgif1, Myoz1, Cnnm4, Wdr74, Leo1, Apold1
GO:0050794	regulation of cellular process	BP	11349	68	1.98774e-05	Ap2m1, Bdnf, Btg2, Cdk11b, Dclk1, Egr1, Egr2, Egr4, Fos, Fosb, Fosl2, Gapdh, Gem, Nr4a1, Hr, Ccn1, Junb, Klf2, Rps2, Mxd1, Mapkapk5, Sik1, Ppp1r15a, Nr4a3, Nr4a2, Nobox, Pcdh8, Ptgs2, Rgs2, Plk2, Srf, Tgif1, Tpt1, Zyx, Gadd45g, Taf10, Tbl2, Bag3, Siva1, Usp2, Ppp1r3c, Ddx20, Sertad1, Rassf1, Pard6a, Myoz1, Bambi, Mlip, Tfpt, C2cd4b, Ndel1, Tiparp, Tra2a, Spty2d1, Hinfp, Ppif, Eprs, Actr5, Ggct, R…
GO:0009892	negative regulation of metabolic process	BP	3053	28	1.99666e-05	Btg2, Egr1, Gapdh, Nr4a1, Hr, Klf2, Mxd1, Sik1, Ppp1r15a, Nr4a3, Nr4a2, Ptgs2, Rgs2, Srf, Tgif1, Gadd45g, Bag3, Usp2, Ddx20, Pard6a, Myoz1, Mlip, Tiparp, Hinfp, Ppif, Eprs, Arid5a, Acd
GO:0044085	cellular component biogenesis	BP	2886	27	2.04747e-05	Ap2m1, Bdnf, Cenpa, Ccn1, Rps2, Rps17, Plk2, Srf, Surf6, Zyx, Taf10, Nubp2, Rpl7a, Bag3, Ddx20, Myoz1, Nip7, Atg12, Nop9, Taf11, Ndel1, Spty2d1, Wdr74, Utp14b, Tbl3, Npas4, Acd
GO:0050789	regulation of biological process	BP	11880	70	2.36739e-05	Ap2m1, Bdnf, Btg2, Cdk11b, Dclk1, Egr1, Egr2, Egr4, Fos, Fosb, Fosl2, Gapdh, Gem, Nr4a1, Hr, Ccn1, Junb, Klf2, Rps2, Mxd1, Mapkapk5, Sik1, Ppp1r15a, Nr4a3, Nr4a2, Nobox, Pcdh8, Ptgs2, Rgs2, Plk2, Srf, Tgif1, Tpt1, Zyx, Gadd45g, Taf10, Tbl2, Bag3, Siva1, Usp2, Ppp1r3c, Ddx20, Sertad1, Rassf1, Pard6a, Myoz1, Bambi, Taf11, Mlip, Tfpt, C2cd4b, Ndel1, Tiparp, Tra2a, Spty2d1, Hinfp, Ppif, Eprs, Actr5, …
GO:0007049	cell cycle	BP	1641	19	2.58243e-05	Btg2, Cdk11b, Cenpa, Gem, Nr4a1, Junb, Sik1, Nr4a3, Ptgs2, Rgs2, Plk2, Gadd45g, Taf10, Usp2, Rassf1, Pard6a, Ndel1, Hinfp, Utp14b
GO:0042981	regulation of apoptotic process	BP	1495	18	2.58878e-05	Bdnf, Btg2, Cdk11b, Egr1, Gapdh, Nr4a1, Ccn1, Nr4a3, Nr4a2, Ptgs2, Plk2, Tpt1, Gadd45g, Bag3, Siva1, Ddx20, Tfpt, Ppif
GO:0035914	skeletal muscle cell differentiation	BP	87	5	2.5908e-05	Btg2, Egr1, Egr2, Fos, Nr4a1
GO:0035258	steroid hormone receptor binding	MF	88	5	2.7382e-05	Nr4a1, Nr4a3, Nr4a2, Taf10, Arid5a
GO:0010942	positive regulation of cell death	BP	713	12	2.83136e-05	Egr1, Fos, Gapdh, Nr4a1, Ccn1, Nr4a3, Ptgs2, Gadd45g, Siva1, Ddx20, Tfpt, Ppif
GO:0000790	nuclear chromatin	CC	717	12	2.98945e-05	Cenpa, Egr1, Egr2, Egr4, Junb, Klf2, Mxd1, Srf, Tgif1, Tfpt, Actr5, Npas4
GO:0007613	memory	BP	149	6	2.99532e-05	Bdnf, Egr1, Ptgs2, Plk2, Srf, Npas4
GO:0043067	regulation of programmed cell death	BP	1519	18	3.18987e-05	Bdnf, Btg2, Cdk11b, Egr1, Gapdh, Nr4a1, Ccn1, Nr4a3, Nr4a2, Ptgs2, Plk2, Tpt1, Gadd45g, Bag3, Siva1, Ddx20, Tfpt, Ppif
GO:0044267	cellular protein metabolic process	BP	4602	36	3.2583e-05	Bdnf, Btg2, Cdk11b, Dclk1, Egr1, Egr2, Gapdh, Nr4a1, Hr, Ccn1, Rps2, Mapkapk5, Sik1, Ppp1r15a, Ptgs2, Rgs2, Rps17, Plk2, Gadd45g, Taf10, Lypla2, Usp2, Rassf1, Pard6a, Rpl37, Atg12, Rpl22l1, Fbxo33, Tiparp, Ppif, Eprs, Ube2j2, Arid5a, B3gnt8, Leo1, Vps37b
GO:0003723	RNA binding	MF	1103	15	3.30648e-05	Rps2, Srf, Surf6, Impdh2, Rpl7a, Ddx20, Nip7, Rpl37, Nop9, Rpl22l1, Tra2a, Eprs, Tbl3, Arid5a, Dhx8
GO:0048513	animal organ development	BP	3497	30	3.37409e-05	Bdnf, Btg2, Dclk1, Egr1, Egr2, Fos, Fosl2, Nr4a1, Ccn1, Junb, Klf2, Sik1, Nr4a3, Nr4a2, Nobox, Ptgs2, Rgs2, Srf, Tgif1, Gadd45g, Taf10, Usp2, Myoz1, Bambi, Ndel1, Cnnm4, Tiparp, Unc45a, Arid5a, Leo1
GO:0043618	regulation of transcription from RNA polymerase II promot...	BP	46	4	3.39465e-05	Egr1, Klf2, Ppp1r15a, Bag3
GO:0006396	RNA processing	BP	849	13	3.45471e-05	Cdk11b, Rps17, Rpl7a, Ddx20, Snrnp40, Cwc25, Nop9, Tra2a, Wdr74, Utp14b, Tbl3, Dhx8, Leo1
GO:0010941	regulation of cell death	BP	1677	19	3.47039e-05	Bdnf, Btg2, Cdk11b, Egr1, Fos, Gapdh, Nr4a1, Ccn1, Nr4a3, Nr4a2, Ptgs2, Plk2, Tpt1, Gadd45g, Bag3, Siva1, Ddx20, Tfpt, Ppif
GO:0097190	apoptotic signaling pathway	BP	614	11	3.53052e-05	Bdnf, Cdk11b, Nr4a2, Ptgs2, Tpt1, Bag3, Siva1, Tfpt, Ppif, Ggct, Rhot2
GO:0032502	developmental process	BP	6266	44	4.52871e-05	Amd1, Bdnf, Btg2, Cdk11b, Dclk1, Egr1, Egr2, Fos, Fosl2, Gapdh, Nr4a1, Ccn1, Junb, Klf2, Mapkapk5, Sik1, Nr4a3, Nr4a2, Nobox, Pcdh8, Ptgs2, Rgs2, Plk2, Srf, Tgif1, Tpt1, Gadd45g, Taf10, Usp2, Ddx20, Myoz1, Bambi, Ndel1, Cnnm4, Tiparp, Unc45a, Hinfp, Wdr74, Utp14b, Arid5a, Npas4, Leo1, Apold1, Acd
GO:0000472	endonucleolytic cleavage to generate mature 5'-end of SSU...	BP	3	2	4.67875e-05	Nop9, Tbl3
GO:0000967	rRNA 5'-end processing	BP	3	2	4.67875e-05	Nop9, Tbl3
GO:0043620	regulation of DNA-templated transcription in response to ...	BP	51	4	5.11948e-05	Egr1, Klf2, Ppp1r15a, Bag3
GO:0043065	positive regulation of apoptotic process	BP	643	11	5.34783e-05	Egr1, Gapdh, Nr4a1, Ccn1, Nr4a3, Ptgs2, Gadd45g, Siva1, Ddx20, Tfpt, Ppif
GO:0043167	ion binding	MF	5496	40	5.35357e-05	Amd1, Cdk11b, Dclk1, Egr1, Egr2, Egr4, Gem, Nr4a1, Hr, Ccn1, Klf2, Sik1, Nr4a3, Nr4a2, Pcdh8, Ptgs2, Plk2, Tpt1, Zyx, Impdh2, Nubp2, Siva1, Usp2, Ddx20, Rassf1, Adprm, Ogfod2, Rpl37, Tiparp, Hinfp, Eprs, Ube2j2, Rem2, Irgq, Rhot2, Dhx8, Arl4c, Tpm4, Gmppb, Gbp11
GO:0050896	response to stimulus	BP	9337	58	5.3961e-05	Bdnf, Btg2, Cdk11b, Dclk1, Egr1, Egr2, Fos, Fosb, Fosl2, Gapdh, Gem, Nr4a1, Ccn1, Junb, Klf2, Rps2, Mapkapk5, Sik1, Ppp1r15a, Nr4a3, Nr4a2, Ptgs2, Rgs2, Plk2, Srf, Tgif1, Tpt1, Zyx, Gadd45g, Impdh2, Tbl2, Bag3, Siva1, Usp2, Rassf1, Myoz1, Bambi, Mlip, Tfpt, C2cd4b, Ndel1, Cnnm4, Tiparp, Hinfp, Ppif, Eprs, Actr5, Ggct, Ube2j2, Rem2, Arid5a, Rhot2, Npas4, Leo1, Gpr151, Olfr273, Acd, Gbp11
GO:0043068	positive regulation of programmed cell death	BP	648	11	5.73122e-05	Egr1, Gapdh, Nr4a1, Ccn1, Nr4a3, Ptgs2, Gadd45g, Siva1, Ddx20, Tfpt, Ppif
GO:0065009	regulation of molecular function	BP	2562	24	6.34709e-05	Bdnf, Egr1, Gapdh, Gem, Nr4a1, Hr, Ccn1, Rps2, Mapkapk5, Sik1, Ppp1r15a, Nr4a2, Ptgs2, Rgs2, Plk2, Srf, Gadd45g, Taf10, Siva1, Bambi, Ndel1, Ppif, Rem2, Acd
GO:0035259	glucocorticoid receptor binding	MF	20	3	6.62792e-05	Nr4a1, Nr4a3, Nr4a2
GO:0002042	cell migration involved in sprouting angiogenesis	BP	55	4	6.90181e-05	Nr4a1, Ptgs2, Plk2, Srf
GO:0005737	cytoplasm	CC	11029	65	6.90998e-05	Amd1, Ap2m1, Bdnf, Btg2, Egr1, Egr2, Fos, Gapdh, Nr4a1, Rps2, Mxd1, Mapkapk5, Sik1, Ppp1r15a, Nr4a2, Nobox, Ptgs2, Rgs2, Rps17, Plk2, Srf, Tpt1, Zyx, Gadd45g, Impdh2, Taf10, Lypla2, Nubp2, Rpl7a, Tbl2, Bag3, Siva1, Usp2, Ppp1r3c, Ddx20, Sertad1, Rassf1, Pard6a, Myoz1, Nip7, Atp5md, Snrnp40, Rpl37, Atg12, Coq10b, Bambi, Taf11, Tfpt, Ndel1, Unc45a, Ppif, Eprs, Actr5, Ggct, Ube2j2, Utp14b, Rhot2, B3…
GO:0043271	negative regulation of ion transport	BP	174	6	7.11319e-05	Gem, Ptgs2, Rgs2, Usp2, Ppif, Rem2
GO:0019538	protein metabolic process	BP	5167	38	7.1543e-05	Bdnf, Btg2, Cdk11b, Dclk1, Egr1, Egr2, Gapdh, Nr4a1, Hr, Ccn1, Klf2, Rps2, Mapkapk5, Sik1, Ppp1r15a, Ptgs2, Rgs2, Rps17, Plk2, Gadd45g, Taf10, Lypla2, Bag3, Usp2, Rassf1, Pard6a, Rpl37, Atg12, Rpl22l1, Fbxo33, Tiparp, Ppif, Eprs, Ube2j2, Arid5a, B3gnt8, Leo1, Vps37b
GO:0043066	negative regulation of apoptotic process	BP	913	13	7.22658e-05	Bdnf, Btg2, Cdk11b, Gapdh, Nr4a1, Ccn1, Nr4a3, Nr4a2, Ptgs2, Plk2, Tpt1, Bag3, Ppif
GO:0009725	response to hormone	BP	678	11	8.56551e-05	Bdnf, Egr1, Egr2, Nr4a1, Nr4a3, Nr4a2, Srf, Ndel1, Eprs, Arid5a, Npas4
GO:0043069	negative regulation of programmed cell death	BP	933	13	8.97693e-05	Bdnf, Btg2, Cdk11b, Gapdh, Nr4a1, Ccn1, Nr4a3, Nr4a2, Ptgs2, Plk2, Tpt1, Bag3, Ppif
GO:1902494	catalytic complex	CC	1352	16	9.25972e-05	Hr, Ppp1r15a, Polr1c, Taf10, Ppp1r3c, Snrnp40, Cwc25, Atg12, Taf11, Tfpt, Fbxo33, Wdr74, Actr5, Ube2j2, Dhx8, Leo1
GO:0097452	GAIT complex	CC	4	2	9.33314e-05	Gapdh, Eprs
GO:0035976	transcription factor AP-1 complex	CC	4	2	9.33314e-05	Fos, Junb
GO:0009790	embryo development	BP	1211	15	9.45003e-05	Amd1, Cdk11b, Ccn1, Junb, Klf2, Nr4a3, Pcdh8, Srf, Tgif1, Taf10, Ndel1, Hinfp, Wdr74, Leo1, Acd
GO:0016922	nuclear receptor binding	MF	114	5	9.45144e-05	Nr4a1, Nr4a3, Nr4a2, Taf10, Arid5a
GO:0006464	cellular protein modification process	BP	3518	29	9.68954e-05	Bdnf, Btg2, Cdk11b, Dclk1, Egr1, Egr2, Gapdh, Hr, Ccn1, Rps2, Mapkapk5, Sik1, Ppp1r15a, Ptgs2, Rgs2, Plk2, Gadd45g, Taf10, Lypla2, Usp2, Rassf1, Pard6a, Atg12, Tiparp, Ppif, Ube2j2, Arid5a, B3gnt8, Leo1
GO:0036211	protein modification process	BP	3518	29	9.68954e-05	Bdnf, Btg2, Cdk11b, Dclk1, Egr1, Egr2, Gapdh, Hr, Ccn1, Rps2, Mapkapk5, Sik1, Ppp1r15a, Ptgs2, Rgs2, Plk2, Gadd45g, Taf10, Lypla2, Usp2, Rassf1, Pard6a, Atg12, Tiparp, Ppif, Ube2j2, Arid5a, B3gnt8, Leo1
GO:0005730	nucleolus	CC	811	12	9.68967e-05	Polr1c, Surf6, Rpl7a, Nip7, Nop9, Tra2a, Spty2d1, Wdr74, Utp14b, Tbl3, Arid5a, Leo1
GO:0000228	nuclear chromosome	CC	950	13	0.000107429	Cenpa, Egr1, Egr2, Egr4, Junb, Klf2, Mxd1, Srf, Tgif1, Tfpt, Actr5, Npas4, Acd
GO:0046983	protein dimerization activity	MF	952	13	0.000109692	Cenpa, Nr4a1, Mxd1, Nr4a3, Nr4a2, Ptgs2, Polr1c, Srf, Taf11, Eprs, Ggct, Npas4, Tpm4
GO:0051926	negative regulation of calcium ion transport	BP	62	4	0.000110496	Gem, Ptgs2, Usp2, Rem2
GO:0010033	response to organic substance	BP	3009	26	0.000113683	Bdnf, Egr1, Egr2, Fos, Fosl2, Gapdh, Nr4a1, Ccn1, Rps2, Ppp1r15a, Nr4a3, Nr4a2, Ptgs2, Srf, Zyx, Impdh2, Tbl2, Bag3, Bambi, Ndel1, Tiparp, Eprs, Ube2j2, Arid5a, Npas4, Gbp11
GO:0006412	translation	BP	585	10	0.000118956	Btg2, Gapdh, Rps2, Mapkapk5, Ppp1r15a, Rgs2, Rps17, Rpl37, Rpl22l1, Eprs
GO:0071310	cellular response to organic substance	BP	2346	22	0.000132805	Bdnf, Egr1, Egr2, Fos, Gapdh, Nr4a1, Ccn1, Rps2, Ppp1r15a, Nr4a3, Nr4a2, Zyx, Impdh2, Tbl2, Bag3, Bambi, Ndel1, Tiparp, Eprs, Arid5a, Npas4, Gbp11
GO:0002040	sprouting angiogenesis	BP	123	5	0.000135214	Nr4a1, Klf2, Ptgs2, Plk2, Srf
GO:0043604	amide biosynthetic process	BP	718	11	0.000141512	Btg2, Gapdh, Ccn1, Rps2, Mapkapk5, Ppp1r15a, Rgs2, Rps17, Rpl37, Rpl22l1, Eprs
GO:0001701	in utero embryonic development	BP	488	9	0.000149698	Amd1, Cdk11b, Ccn1, Junb, Klf2, Srf, Ndel1, Hinfp, Wdr74
GO:0005694	chromosome	CC	1410	16	0.000150042	Cenpa, Egr1, Egr2, Egr4, Hr, Junb, Klf2, Mxd1, Plk2, Srf, Tgif1, Tfpt, Ndel1, Actr5, Npas4, Acd
GO:1901842	negative regulation of high voltage-gated calcium channel...	BP	5	2	0.000155147	Gem, Rem2
GO:0007610	behavior	BP	726	11	0.000155791	Bdnf, Btg2, Egr1, Egr2, Nr4a3, Nr4a2, Ptgs2, Plk2, Srf, Usp2, Npas4
GO:0043043	peptide biosynthetic process	BP	607	10	0.000160413	Btg2, Gapdh, Rps2, Mapkapk5, Ppp1r15a, Rgs2, Rps17, Rpl37, Rpl22l1, Eprs
GO:1901564	organonitrogen compound metabolic process	BP	5979	41	0.000162584	Amd1, Bdnf, Btg2, Cdk11b, Dclk1, Egr1, Egr2, Gapdh, Nr4a1, Hr, Ccn1, Klf2, Rps2, Mapkapk5, Sik1, Ppp1r15a, Nr4a2, Ptgs2, Rgs2, Rps17, Plk2, Gadd45g, Impdh2, Taf10, Lypla2, Bag3, Usp2, Rassf1, Pard6a, Rpl37, Atg12, Rpl22l1, Fbxo33, Tiparp, Ppif, Eprs, Ube2j2, Arid5a, B3gnt8, Leo1, Vps37b
GO:0048731	system development	BP	4776	35	0.000166387	Bdnf, Btg2, Dclk1, Egr1, Egr2, Fos, Fosl2, Nr4a1, Ccn1, Junb, Klf2, Mapkapk5, Sik1, Nr4a3, Nr4a2, Nobox, Ptgs2, Rgs2, Plk2, Srf, Tgif1, Gadd45g, Taf10, Usp2, Myoz1, Bambi, Ndel1, Cnnm4, Tiparp, Unc45a, Arid5a, Npas4, Leo1, Apold1, Acd
GO:0046966	thyroid hormone receptor binding	MF	27	3	0.000166641	Hr, Taf11, Arid5a
GO:0006364	rRNA processing	BP	205	6	0.000174479	Rps17, Rpl7a, Nop9, Wdr74, Utp14b, Tbl3
GO:0007611	learning or memory	BP	295	7	0.000183323	Bdnf, Btg2, Egr1, Ptgs2, Plk2, Srf, Npas4
GO:1901566	organonitrogen compound biosynthetic process	BP	1445	16	0.000198092	Amd1, Btg2, Gapdh, Ccn1, Rps2, Mapkapk5, Ppp1r15a, Nr4a2, Rgs2, Rps17, Impdh2, Rpl37, Atg12, Rpl22l1, Eprs, B3gnt8
GO:0042273	ribosomal large subunit biogenesis	BP	73	4	0.000208459	Surf6, Rpl7a, Nip7, Wdr74
GO:0016072	rRNA metabolic process	BP	214	6	0.000220038	Rps17, Rpl7a, Nop9, Wdr74, Utp14b, Tbl3
GO:0043412	macromolecule modification	BP	3698	29	0.000231083	Bdnf, Btg2, Cdk11b, Dclk1, Egr1, Egr2, Gapdh, Hr, Ccn1, Rps2, Mapkapk5, Sik1, Ppp1r15a, Ptgs2, Rgs2, Plk2, Gadd45g, Taf10, Lypla2, Usp2, Rassf1, Pard6a, Atg12, Tiparp, Ppif, Ube2j2, Arid5a, B3gnt8, Leo1
GO:0000480	endonucleolytic cleavage in 5'-ETS of tricistronic rRNA t...	BP	6	2	0.000232116	Nop9, Tbl3
GO:0003682	chromatin binding	MF	641	10	0.000248133	Egr1, Egr2, Fos, Fosl2, Hr, Srf, Tgif1, Taf10, Hinfp, Arid5a
GO:0071277	cellular response to calcium ion	BP	77	4	0.000256034	Fos, Fosb, Junb, Ppif
GO:0060548	negative regulation of cell death	BP	1049	13	0.0002824	Bdnf, Btg2, Cdk11b, Gapdh, Nr4a1, Ccn1, Nr4a3, Nr4a2, Ptgs2, Plk2, Tpt1, Bag3, Ppif
GO:0043009	chordate embryonic development	BP	779	11	0.000285016	Amd1, Cdk11b, Ccn1, Junb, Klf2, Pcdh8, Srf, Tgif1, Ndel1, Hinfp, Wdr74
GO:0050805	negative regulation of synaptic transmission	BP	82	4	0.000325899	Bdnf, Ptgs2, Plk2, Srf
GO:2001234	negative regulation of apoptotic signaling pathway	BP	231	6	0.000331319	Bdnf, Cdk11b, Nr4a2, Ptgs2, Tpt1, Ppif
GO:1902686	mitochondrial outer membrane permeabilization involved in...	BP	34	3	0.000334072	Siva1, Ppif, Rhot2
GO:0042221	response to chemical	BP	3973	30	0.000338801	Bdnf, Egr1, Egr2, Fos, Fosb, Fosl2, Gapdh, Nr4a1, Ccn1, Junb, Klf2, Rps2, Ppp1r15a, Nr4a3, Nr4a2, Ptgs2, Srf, Zyx, Impdh2, Tbl2, Bag3, Bambi, Ndel1, Tiparp, Ppif, Eprs, Ube2j2, Arid5a, Npas4, Gbp11
GO:0001824	blastocyst development	BP	150	5	0.000340009	Cdk11b, Junb, Srf, Ndel1, Wdr74
GO:0009792	embryo development ending in birth or egg hatching	BP	796	11	0.000342071	Amd1, Cdk11b, Ccn1, Junb, Klf2, Pcdh8, Srf, Tgif1, Ndel1, Hinfp, Wdr74
GO:0043169	cation binding	MF	3606	28	0.000358048	Amd1, Egr1, Egr2, Egr4, Gem, Nr4a1, Hr, Klf2, Sik1, Nr4a3, Nr4a2, Pcdh8, Ptgs2, Tpt1, Zyx, Impdh2, Nubp2, Siva1, Usp2, Rassf1, Adprm, Ogfod2, Rpl37, Tiparp, Hinfp, Eprs, Rhot2, Tpm4
GO:0050890	cognition	BP	332	7	0.000374655	Bdnf, Btg2, Egr1, Ptgs2, Plk2, Srf, Npas4
GO:0043434	response to peptide hormone	BP	335	7	0.000395359	Egr1, Egr2, Nr4a1, Nr4a3, Nr4a2, Ndel1, Eprs
GO:1901265	nucleoside phosphate binding	MF	2029	19	0.000410602	Cdk11b, Dclk1, Gapdh, Gem, Sik1, Plk2, Impdh2, Nubp2, Bag3, Ddx20, Eprs, Ube2j2, Rem2, Irgq, Rhot2, Dhx8, Arl4c, Gmppb, Gbp11
GO:0000166	nucleotide binding	MF	2029	19	0.000410602	Cdk11b, Dclk1, Gapdh, Gem, Sik1, Plk2, Impdh2, Nubp2, Bag3, Ddx20, Eprs, Ube2j2, Rem2, Irgq, Rhot2, Dhx8, Arl4c, Gmppb, Gbp11
GO:0016604	nuclear body	CC	686	10	0.000423226	Bdnf, Hr, Nr4a2, Snrnp40, Cwc25, Mlip, Unc45a, Hinfp, Dhx8, Acd
GO:1904063	negative regulation of cation transmembrane transport	BP	88	4	0.000426611	Gem, Rgs2, Ppif, Rem2
GO:0035794	positive regulation of mitochondrial membrane permeabilit...	BP	37	3	0.00043003	Siva1, Ppif, Rhot2
GO:0042809	vitamin D receptor binding	MF	8	2	0.000431032	Hr, Taf11
GO:0009719	response to endogenous stimulus	BP	1395	15	0.000432019	Bdnf, Egr1, Egr2, Fos, Nr4a1, Ccn1, Nr4a3, Nr4a2, Srf, Zyx, Bambi, Ndel1, Eprs, Arid5a, Npas4
GO:0051726	regulation of cell cycle	BP	964	12	0.000469165	Btg2, Cdk11b, Nr4a1, Junb, Sik1, Nr4a3, Ptgs2, Plk2, Gadd45g, Usp2, Rassf1, Hinfp
GO:1905710	positive regulation of membrane permeability	BP	39	3	0.00050288	Siva1, Ppif, Rhot2
GO:0045444	fat cell differentiation	BP	250	6	0.000503394	Egr2, Nr4a1, Nr4a3, Nr4a2, Ptgs2, Rgs2
GO:0007616	long-term memory	BP	40	3	0.000542083	Egr1, Srf, Npas4
GO:0009653	anatomical structure morphogenesis	BP	2777	23	0.000551537	Bdnf, Dclk1, Egr2, Nr4a1, Ccn1, Junb, Klf2, Nr4a3, Nr4a2, Pcdh8, Ptgs2, Plk2, Srf, Tgif1, Myoz1, Bambi, Ndel1, Cnnm4, Tiparp, Wdr74, Leo1, Apold1, Acd
GO:0005525	GTP binding	MF	355	7	0.000557953	Gem, Rem2, Irgq, Rhot2, Arl4c, Gmppb, Gbp11
GO:0046872	metal ion binding	MF	3518	27	0.000560984	Egr1, Egr2, Egr4, Gem, Nr4a1, Hr, Klf2, Sik1, Nr4a3, Nr4a2, Pcdh8, Ptgs2, Tpt1, Zyx, Impdh2, Nubp2, Siva1, Usp2, Rassf1, Adprm, Ogfod2, Rpl37, Tiparp, Hinfp, Eprs, Rhot2, Tpm4
GO:0021954	central nervous system neuron development	BP	95	4	0.000570114	Btg2, Dclk1, Nr4a2, Ndel1
GO:0055029	nuclear DNA-directed RNA polymerase complex	CC	96	4	0.00059309	Polr1c, Taf10, Taf11, Leo1
GO:0048585	negative regulation of response to stimulus	BP	1601	16	0.000612259	Bdnf, Cdk11b, Egr1, Mapkapk5, Ppp1r15a, Nr4a3, Nr4a2, Ptgs2, Rgs2, Plk2, Tgif1, Tpt1, Myoz1, Bambi, Mlip, Ppif
GO:0000428	DNA-directed RNA polymerase complex	CC	97	4	0.000616717	Polr1c, Taf10, Taf11, Leo1
GO:0032550	purine ribonucleoside binding	MF	362	7	0.000626016	Gem, Rem2, Irgq, Rhot2, Arl4c, Gmppb, Gbp11
GO:0021955	central nervous system neuron axonogenesis	BP	42	3	0.000626238	Dclk1, Nr4a2, Ndel1
GO:0007612	learning	BP	172	5	0.000634436	Bdnf, Btg2, Ptgs2, Srf, Npas4
GO:0032549	ribonucleoside binding	MF	365	7	0.000657133	Gem, Rem2, Irgq, Rhot2, Arl4c, Gmppb, Gbp11
GO:0001883	purine nucleoside binding	MF	366	7	0.000667774	Gem, Rem2, Irgq, Rhot2, Arl4c, Gmppb, Gbp11
GO:0010035	response to inorganic substance	BP	479	8	0.000673942	Fos, Fosb, Gapdh, Nr4a1, Junb, Nr4a3, Nr4a2, Ppif
GO:0005829	cytosol	CC	3561	27	0.000677125	Amd1, Gapdh, Nr4a1, Rps2, Mxd1, Mapkapk5, Sik1, Rgs2, Rps17, Tpt1, Zyx, Impdh2, Nubp2, Rpl7a, Bag3, Ddx20, Nip7, Snrnp40, Rpl37, Atg12, Ndel1, Unc45a, Eprs, Ggct, Utp14b, Arl4c, Apold1
GO:0030880	RNA polymerase complex	CC	100	4	0.000691597	Polr1c, Taf10, Taf11, Leo1
GO:1902895	positive regulation of pri-miRNA transcription by RNA pol...	BP	44	3	0.000718301	Egr1, Fos, Srf
GO:0051240	positive regulation of multicellular organismal process	BP	1955	18	0.00071943	Bdnf, Egr1, Egr2, Fos, Gapdh, Ccn1, Mapkapk5, Nr4a3, Ptgs2, Rgs2, Plk2, Srf, Tgif1, Gadd45g, Usp2, Bambi, Ndel1, Arid5a
GO:0071496	cellular response to external stimulus	BP	269	6	0.00073823	Fos, Sik1, Nr4a2, Srf, Tbl2, Bag3
GO:0017076	purine nucleotide binding	MF	1797	17	0.000758355	Cdk11b, Dclk1, Gem, Sik1, Plk2, Nubp2, Bag3, Ddx20, Eprs, Ube2j2, Rem2, Irgq, Rhot2, Dhx8, Arl4c, Gmppb, Gbp11
GO:0001568	blood vessel development	BP	741	10	0.000766488	Egr1, Nr4a1, Ccn1, Junb, Klf2, Ptgs2, Plk2, Srf, Tiparp, Apold1
GO:0043044	ATP-dependent chromatin remodeling	BP	45	3	0.000767387	Ptma, Spty2d1, Actr5
GO:0001882	nucleoside binding	MF	375	7	0.000769828	Gem, Rem2, Irgq, Rhot2, Arl4c, Gmppb, Gbp11
GO:0034766	negative regulation of ion transmembrane transport	BP	104	4	0.00080116	Gem, Rgs2, Ppif, Rem2
GO:0032870	cellular response to hormone stimulus	BP	493	8	0.000811934	Bdnf, Nr4a1, Nr4a3, Nr4a2, Ndel1, Eprs, Arid5a, Npas4
GO:0019001	guanyl nucleotide binding	MF	379	7	0.000818973	Gem, Rem2, Irgq, Rhot2, Arl4c, Gmppb, Gbp11
GO:0032561	guanyl ribonucleotide binding	MF	379	7	0.000818973	Gem, Rem2, Irgq, Rhot2, Arl4c, Gmppb, Gbp11
GO:0044092	negative regulation of molecular function	BP	1030	12	0.000837384	Gapdh, Gem, Nr4a1, Hr, Sik1, Ppp1r15a, Ptgs2, Rgs2, Gadd45g, Siva1, Ppif, Rem2
GO:0046890	regulation of lipid biosynthetic process	BP	183	5	0.000838556	Egr1, Ccn1, Sik1, Ptgs2, Ddx20
GO:0006518	peptide metabolic process	BP	752	10	0.000857175	Btg2, Gapdh, Rps2, Mapkapk5, Ppp1r15a, Rgs2, Rps17, Rpl37, Rpl22l1, Eprs
GO:0042802	identical protein binding	MF	2165	19	0.000900664	Amd1, Gapdh, Nr4a1, Nr4a3, Ptgs2, Srf, Gadd45g, Impdh2, Taf10, Usp2, Rassf1, Ndel1, Tra2a, Eprs, Ggct, Arid5a, Dhx8, Gpr151, Tpm4
GO:0065008	regulation of biological quality	BP	4017	29	0.000907632	Ap2m1, Bdnf, Slc29a2, Egr1, Gapdh, Klf2, Mapkapk5, Ppp1r15a, Nr4a3, Pcdh8, Ptgs2, Rgs2, Rps17, Plk2, Srf, Gadd45g, Bag3, Siva1, Usp2, Rassf1, Bambi, C2cd4b, Ndel1, Cnnm4, Tiparp, Ppif, Rhot2, Npas4, Acd
GO:0010648	negative regulation of cell communication	BP	1346	14	0.000933146	Bdnf, Cdk11b, Egr1, Mapkapk5, Nr4a2, Ptgs2, Rgs2, Plk2, Srf, Tgif1, Tpt1, Myoz1, Bambi, Ppif
GO:0046982	protein heterodimerization activity	MF	282	6	0.000942362	Cenpa, Nr4a1, Nr4a2, Taf11, Npas4, Tpm4
GO:0023057	negative regulation of signaling	BP	1349	14	0.000953246	Bdnf, Cdk11b, Egr1, Mapkapk5, Nr4a2, Ptgs2, Rgs2, Plk2, Srf, Tgif1, Tpt1, Myoz1, Bambi, Ppif
GO:0008637	apoptotic mitochondrial changes	BP	111	4	0.0010215	Siva1, Ppif, Ggct, Rhot2
GO:0071346	cellular response to interferon-gamma	BP	111	4	0.0010215	Gapdh, Zyx, Eprs, Gbp11
GO:0022626	cytosolic ribosome	CC	111	4	0.0010215	Rps2, Rps17, Rpl7a, Rpl37
GO:0071495	cellular response to endogenous stimulus	BP	1208	13	0.00105128	Bdnf, Egr1, Fos, Nr4a1, Ccn1, Nr4a3, Nr4a2, Zyx, Bambi, Ndel1, Eprs, Arid5a, Npas4
GO:0001944	vasculature development	BP	775	10	0.0010755	Egr1, Nr4a1, Ccn1, Junb, Klf2, Ptgs2, Plk2, Srf, Tiparp, Apold1
GO:1901652	response to peptide	BP	399	7	0.00110317	Egr1, Egr2, Nr4a1, Nr4a3, Nr4a2, Ndel1, Eprs
GO:0048514	blood vessel morphogenesis	BP	644	9	0.0011058	Nr4a1, Ccn1, Junb, Klf2, Ptgs2, Plk2, Srf, Tiparp, Apold1
GO:0034248	regulation of cellular amide metabolic process	BP	401	7	0.00113538	Btg2, Gapdh, Ccn1, Mapkapk5, Ppp1r15a, Rgs2, Eprs
GO:0045933	positive regulation of muscle contraction	BP	52	3	0.00117124	Ptgs2, Rgs2, Srf
GO:0031975	envelope	CC	1072	12	0.00117921	Bdnf, Gapdh, Nr4a1, Ppp1r15a, Ptgs2, Atp5md, Coq10b, Mlip, Tfpt, Ndel1, Ppif, Rhot2
GO:0031967	organelle envelope	CC	1072	12	0.00117921	Bdnf, Gapdh, Nr4a1, Ppp1r15a, Ptgs2, Atp5md, Coq10b, Mlip, Tfpt, Ndel1, Ppif, Rhot2
GO:0097201	negative regulation of transcription from RNA polymerase ...	BP	13	2	0.00118521	Ppp1r15a, Bag3
GO:0006886	intracellular protein transport	BP	927	11	0.00119448	Ap2m1, Egr2, Ptgs2, Bag3, Ppp1r3c, Fam53c, Nop9, Ndel1, Arl4c, Vps37b, Acd
GO:0051402	neuron apoptotic process	BP	296	6	0.00120814	Bdnf, Btg2, Egr1, Gapdh, Nr4a3, Nr4a2
GO:0035239	tube morphogenesis	BP	930	11	0.00122566	Nr4a1, Ccn1, Junb, Klf2, Nr4a3, Ptgs2, Plk2, Srf, Tgif1, Tiparp, Apold1
GO:0098531	ligand-activated transcription factor activity	MF	53	3	0.00123794	Nr4a1, Nr4a3, Nr4a2
GO:0004879	nuclear receptor activity	MF	53	3	0.00123794	Nr4a1, Nr4a3, Nr4a2
GO:0046902	regulation of mitochondrial membrane permeability	BP	53	3	0.00123794	Siva1, Ppif, Rhot2
GO:0006986	response to unfolded protein	BP	117	4	0.00124162	Ppp1r15a, Tbl2, Bag3, Ube2j2
GO:0035639	purine ribonucleoside triphosphate binding	MF	1712	16	0.00124164	Cdk11b, Dclk1, Gem, Sik1, Plk2, Nubp2, Ddx20, Eprs, Ube2j2, Rem2, Irgq, Rhot2, Dhx8, Arl4c, Gmppb, Gbp11
GO:0003012	muscle system process	BP	408	7	0.00125397	Nr4a3, Ptgs2, Rgs2, Srf, Myoz1, Mlip, Tpm4
GO:0048511	rhythmic process	BP	299	6	0.00127189	Bdnf, Egr1, Egr2, Sik1, Impdh2, Usp2
GO:0003707	steroid hormone receptor activity	MF	54	3	0.00130698	Nr4a1, Nr4a3, Nr4a2
GO:0043534	blood vessel endothelial cell migration	BP	119	4	0.00132182	Nr4a1, Ptgs2, Plk2, Srf
GO:0048167	regulation of synaptic plasticity	BP	302	6	0.00133818	Bdnf, Egr1, Ptgs2, Plk2, Srf, Npas4
GO:2001233	regulation of apoptotic signaling pathway	BP	413	7	0.00134447	Bdnf, Cdk11b, Nr4a2, Ptgs2, Tpt1, Siva1, Ppif
GO:0070997	neuron death	BP	414	7	0.00136316	Bdnf, Btg2, Egr1, Fos, Gapdh, Nr4a3, Nr4a2
GO:0031011	Ino80 complex	CC	14	2	0.00137916	Tfpt, Actr5
GO:0000164	protein phosphatase type 1 complex	CC	14	2	0.00137916	Ppp1r15a, Ppp1r3c
GO:1901841	regulation of high voltage-gated calcium channel activity	BP	14	2	0.00137916	Gem, Rem2
GO:0061469	regulation of type B pancreatic cell proliferation	BP	14	2	0.00137916	Nr4a1, Nr4a3
GO:0035613	RNA stem-loop binding	MF	14	2	0.00137916	Eprs, Arid5a
GO:0036094	small molecule binding	MF	2423	20	0.00138084	Cdk11b, Dclk1, Gapdh, Gem, Sik1, Plk2, Impdh2, Nubp2, Bag3, Ddx20, Ogfod2, Eprs, Ube2j2, Rem2, Irgq, Rhot2, Dhx8, Arl4c, Gmppb, Gbp11
GO:0051179	localization	BP	5980	38	0.00142125	Ap2m1, Bdnf, Cenpa, Dclk1, Slc29a2, Egr1, Egr2, Gapdh, Gem, Nr4a1, Ccn1, Sik1, Ppp1r15a, Nr4a3, Nr4a2, Ptgs2, Rgs2, Plk2, Srf, Bag3, Siva1, Pvr, Usp2, Ppp1r3c, Pard6a, Fam53c, Nop9, Bambi, Ndel1, Cnnm4, Hinfp, Ppif, Eprs, Rem2, Rhot2, Arl4c, Vps37b, Acd
GO:1902893	regulation of pri-miRNA transcription by RNA polymerase I...	BP	56	3	0.00145223	Egr1, Fos, Srf
GO:0051094	positive regulation of developmental process	BP	1574	15	0.00146649	Bdnf, Egr1, Egr2, Fos, Ccn1, Junb, Mapkapk5, Ptgs2, Rgs2, Plk2, Srf, Tgif1, Usp2, Bambi, Ndel1
GO:0042826	histone deacetylase binding	MF	123	4	0.00149297	Hr, Sik1, Srf, Ddx20
GO:0007165	signal transduction	BP	5998	38	0.00150418	Bdnf, Cdk11b, Dclk1, Egr1, Fos, Gapdh, Gem, Ccn1, Klf2, Mapkapk5, Sik1, Ppp1r15a, Nr4a3, Nr4a2, Ptgs2, Rgs2, Plk2, Tgif1, Tpt1, Zyx, Gadd45g, Tbl2, Bag3, Siva1, Rassf1, Myoz1, Bambi, Tfpt, Ndel1, Tiparp, Ppif, Ggct, Rem2, Rhot2, Npas4, Leo1, Gpr151, Olfr273
GO:0043500	muscle adaptation	BP	124	4	0.00153805	Nr4a3, Rgs2, Myoz1, Mlip
GO:0032501	multicellular organismal process	BP	8189	48	0.0015404	Amd1, Bdnf, Btg2, Cdk11b, Dclk1, Egr1, Egr2, Fos, Fosl2, Gapdh, Nr4a1, Ccn1, Junb, Klf2, Mapkapk5, Sik1, Nr4a3, Nr4a2, Nobox, Pcdh8, Ptgs2, Rgs2, Plk2, Srf, Tgif1, Tpt1, Gadd45g, Taf10, Usp2, Ddx20, Myoz1, Bambi, Mlip, C2cd4b, Ndel1, Cnnm4, Tiparp, Unc45a, Hinfp, Wdr74, Utp14b, Arid5a, Npas4, Leo1, Olfr273, Tpm4, Apold1, Acd
GO:0033202	DNA helicase complex	CC	15	2	0.00158721	Tfpt, Actr5
GO:0000478	endonucleolytic cleavage involved in rRNA processing	BP	15	2	0.00158721	Nop9, Tbl3
GO:0000479	endonucleolytic cleavage of tricistronic rRNA transcript ...	BP	15	2	0.00158721	Nop9, Tbl3
GO:0001825	blastocyst formation	BP	58	3	0.00160723	Junb, Srf, Wdr74
GO:0061614	pri-miRNA transcription by RNA polymerase II	BP	58	3	0.00160723	Egr1, Fos, Srf
GO:0051592	response to calcium ion	BP	128	4	0.00172789	Fos, Fosb, Junb, Ppif
GO:0007623	circadian rhythm	BP	216	5	0.0017469	Bdnf, Egr1, Sik1, Impdh2, Usp2
GO:0051276	chromosome organization	BP	1124	12	0.00175603	Cenpa, Gem, Hr, Mapkapk5, Ptma, Taf10, Sertad1, Spty2d1, Actr5, Arid5a, Leo1, Acd
GO:0031668	cellular response to extracellular stimulus	BP	217	5	0.0017825	Fos, Sik1, Nr4a2, Srf, Tbl2
GO:0045597	positive regulation of cell differentiation	BP	1127	12	0.00179538	Bdnf, Egr2, Fos, Ccn1, Junb, Mapkapk5, Ptgs2, Rgs2, Srf, Tgif1, Bambi, Ndel1
GO:0000278	mitotic cell cycle	BP	831	10	0.00180235	Btg2, Cdk11b, Cenpa, Gem, Sik1, Plk2, Taf10, Usp2, Ndel1, Hinfp
GO:0071498	cellular response to fluid shear stress	BP	16	2	0.00180925	Klf2, Ptgs2
GO:1901386	negative regulation of voltage-gated calcium channel acti...	BP	16	2	0.00180925	Gem, Rem2
GO:0048385	regulation of retinoic acid receptor signaling pathway	BP	16	2	0.00180925	Klf2, Tgif1
GO:0034763	negative regulation of transmembrane transport	BP	131	4	0.00188052	Gem, Rgs2, Ppif, Rem2
GO:0032555	purine ribonucleotide binding	MF	1785	16	0.00190348	Cdk11b, Dclk1, Gem, Sik1, Plk2, Nubp2, Ddx20, Eprs, Ube2j2, Rem2, Irgq, Rhot2, Dhx8, Arl4c, Gmppb, Gbp11
GO:0034660	ncRNA metabolic process	BP	441	7	0.0019498	Rps17, Rpl7a, Nop9, Wdr74, Eprs, Utp14b, Tbl3
GO:0033365	protein localization to organelle	BP	844	10	0.00201811	Ap2m1, Cenpa, Dclk1, Ppp1r15a, Ptgs2, Bag3, Pard6a, Fam53c, Vps37b, Acd
GO:0034341	response to interferon-gamma	BP	134	4	0.00204225	Gapdh, Zyx, Eprs, Gbp11
GO:0043603	cellular amide metabolic process	BP	993	11	0.00205262	Btg2, Gapdh, Ccn1, Rps2, Mapkapk5, Ppp1r15a, Rgs2, Rps17, Rpl37, Rpl22l1, Eprs
GO:0018105	peptidyl-serine phosphorylation	BP	329	6	0.00206044	Bdnf, Dclk1, Mapkapk5, Ppp1r15a, Ptgs2, Plk2
GO:0009628	response to abiotic stimulus	BP	995	11	0.00208491	Egr1, Fos, Fosl2, Sik1, Nr4a2, Ptgs2, Tbl2, Bag3, Usp2, Actr5, Gpr151
GO:0035295	tube development	BP	1148	12	0.00209167	Bdnf, Nr4a1, Ccn1, Junb, Klf2, Nr4a3, Ptgs2, Plk2, Srf, Tgif1, Tiparp, Apold1
GO:0032553	ribonucleotide binding	MF	1802	16	0.00209428	Cdk11b, Dclk1, Gem, Sik1, Plk2, Nubp2, Ddx20, Eprs, Ube2j2, Rem2, Irgq, Rhot2, Dhx8, Arl4c, Gmppb, Gbp11
GO:0009605	response to external stimulus	BP	2695	21	0.0021111	Bdnf, Egr2, Fos, Gapdh, Nr4a1, Ccn1, Sik1, Nr4a3, Nr4a2, Ptgs2, Srf, Zyx, Tbl2, Bag3, Usp2, Myoz1, C2cd4b, Ndel1, Eprs, Arid5a, Gbp11
GO:0007622	rhythmic behavior	BP	64	3	0.002133	Egr1, Egr2, Usp2
GO:0042255	ribosome assembly	BP	64	3	0.002133	Rps2, Surf6, Nip7
GO:0023052	signaling	BP	6542	40	0.00213547	Bdnf, Cdk11b, Dclk1, Egr1, Fos, Gapdh, Gem, Ccn1, Klf2, Mapkapk5, Sik1, Ppp1r15a, Nr4a3, Nr4a2, Pcdh8, Ptgs2, Rgs2, Plk2, Srf, Tgif1, Tpt1, Zyx, Gadd45g, Tbl2, Bag3, Siva1, Rassf1, Myoz1, Bambi, Tfpt, Ndel1, Tiparp, Ppif, Ggct, Rem2, Rhot2, Npas4, Leo1, Gpr151, Olfr273
GO:0005840	ribosome	CC	228	5	0.00221017	Rps2, Rps17, Rpl7a, Rpl37, Rpl22l1
GO:0048675	axon extension	BP	137	4	0.00221336	Bdnf, Dclk1, Srf, Ndel1
GO:0090398	cellular senescence	BP	65	3	0.00222978	Mapkapk5, Plk2, Srf
GO:0017148	negative regulation of translation	BP	138	4	0.00227252	Btg2, Gapdh, Rgs2, Eprs
GO:0072359	circulatory system development	BP	1161	12	0.00229443	Egr1, Nr4a1, Ccn1, Junb, Klf2, Sik1, Ptgs2, Rgs2, Plk2, Srf, Tiparp, Apold1
GO:0034471	ncRNA 5'-end processing	BP	18	2	0.00229485	Nop9, Tbl3
GO:0090559	regulation of membrane permeability	BP	66	3	0.00232925	Siva1, Ppif, Rhot2
GO:0006940	regulation of smooth muscle contraction	BP	67	3	0.00243142	Ptgs2, Rgs2, Srf
GO:0006397	mRNA processing	BP	459	7	0.00243852	Cdk11b, Ddx20, Snrnp40, Cwc25, Tra2a, Dhx8, Leo1
GO:0010821	regulation of mitochondrion organization	BP	141	4	0.00245654	Bag3, Siva1, Ppif, Rhot2
GO:0035966	response to topologically incorrect protein	BP	141	4	0.00245654	Ppp1r15a, Tbl2, Bag3, Ube2j2
GO:0007154	cell communication	BP	6597	40	0.00250417	Bdnf, Cdk11b, Dclk1, Egr1, Fos, Gapdh, Gem, Ccn1, Klf2, Mapkapk5, Sik1, Ppp1r15a, Nr4a3, Nr4a2, Pcdh8, Ptgs2, Rgs2, Plk2, Srf, Tgif1, Tpt1, Zyx, Gadd45g, Tbl2, Bag3, Siva1, Rassf1, Myoz1, Bambi, Tfpt, Ndel1, Tiparp, Ppif, Ggct, Rem2, Rhot2, Npas4, Leo1, Gpr151, Olfr273
GO:0018193	peptidyl-amino acid modification	BP	1177	12	0.00256583	Bdnf, Dclk1, Egr1, Egr2, Gapdh, Mapkapk5, Ppp1r15a, Ptgs2, Plk2, Taf10, Ppif, Arid5a
GO:0006417	regulation of translation	BP	346	6	0.00264641	Btg2, Gapdh, Mapkapk5, Ppp1r15a, Rgs2, Eprs
GO:0051239	regulation of multicellular organismal process	BP	3324	24	0.0027283	Bdnf, Egr1, Egr2, Fos, Gapdh, Ccn1, Klf2, Mapkapk5, Nr4a3, Nr4a2, Ptgs2, Rgs2, Plk2, Srf, Tgif1, Gadd45g, Usp2, Myoz1, Bambi, Mlip, Ndel1, Arid5a, Leo1, Apold1
GO:0006367	transcription initiation from RNA polymerase II promoter	BP	70	3	0.00275445	Srf, Taf10, Taf11
GO:0045986	negative regulation of smooth muscle contraction	BP	20	2	0.00283506	Ptgs2, Rgs2
GO:0000966	RNA 5'-end processing	BP	20	2	0.00283506	Nop9, Tbl3
GO:0009968	negative regulation of signal transduction	BP	1196	12	0.00292164	Bdnf, Cdk11b, Egr1, Mapkapk5, Nr4a2, Ptgs2, Rgs2, Tgif1, Tpt1, Myoz1, Bambi, Ppif
GO:0007409	axonogenesis	BP	475	7	0.00294778	Bdnf, Dclk1, Egr2, Nr4a3, Nr4a2, Srf, Ndel1
GO:0090257	regulation of muscle system process	BP	244	5	0.00295959	Nr4a3, Ptgs2, Rgs2, Srf, Mlip
GO:0034470	ncRNA processing	BP	354	6	0.00296189	Rps17, Rpl7a, Nop9, Wdr74, Utp14b, Tbl3
GO:0018209	peptidyl-serine modification	BP	354	6	0.00296189	Bdnf, Dclk1, Mapkapk5, Ppp1r15a, Ptgs2, Plk2
GO:0010611	regulation of cardiac muscle hypertrophy	BP	72	3	0.0029838	Nr4a3, Rgs2, Mlip
GO:0050793	regulation of developmental process	BP	2778	21	0.00303439	Bdnf, Egr1, Egr2, Fos, Ccn1, Junb, Klf2, Mapkapk5, Sik1, Ptgs2, Rgs2, Plk2, Srf, Tgif1, Tpt1, Usp2, Myoz1, Bambi, Ndel1, Leo1, Apold1
GO:0007178	transmembrane receptor protein serine/threonine kinase si...	BP	357	6	0.00308716	Egr1, Fos, Ccn1, Tgif1, Zyx, Bambi
GO:0021766	hippocampus development	BP	73	3	0.00310275	Btg2, Nr4a3, Srf
GO:0016591	RNA polymerase II, holoenzyme	CC	73	3	0.00310275	Taf10, Taf11, Leo1
GO:0046697	decidualization	BP	21	2	0.00312537	Junb, Ptgs2
GO:0045475	locomotor rhythm	BP	21	2	0.00312537	Egr1, Usp2
GO:0046716	muscle cell cellular homeostasis	BP	21	2	0.00312537	Srf, Bag3
GO:0090050	positive regulation of cell migration involved in sprouti...	BP	21	2	0.00312537	Ptgs2, Plk2
GO:2000026	regulation of multicellular organismal development	BP	2233	18	0.00314626	Bdnf, Egr1, Egr2, Fos, Ccn1, Klf2, Mapkapk5, Ptgs2, Rgs2, Plk2, Srf, Tgif1, Usp2, Myoz1, Bambi, Ndel1, Leo1, Apold1
GO:0019216	regulation of lipid metabolic process	BP	360	6	0.00321636	Egr1, Ccn1, Sik1, Nr4a3, Ptgs2, Ddx20
GO:0019888	protein phosphatase regulator activity	MF	74	3	0.00322456	Ppp1r15a, Ppp1r3c, Myoz1
GO:0003735	structural constituent of ribosome	MF	153	4	0.00329527	Rps2, Rps17, Rpl37, Rpl22l1
GO:0014743	regulation of muscle hypertrophy	BP	75	3	0.00334928	Nr4a3, Rgs2, Mlip
GO:1903670	regulation of sprouting angiogenesis	BP	75	3	0.00334928	Klf2, Ptgs2, Plk2
GO:0071375	cellular response to peptide hormone stimulus	BP	252	5	0.00339626	Nr4a1, Nr4a3, Nr4a2, Ndel1, Eprs
GO:0060080	inhibitory postsynaptic potential	BP	22	2	0.003429	Bdnf, Npas4
GO:0045843	negative regulation of striated muscle tissue development	BP	76	3	0.00347692	Bdnf, Rgs2, Usp2
GO:0071248	cellular response to metal ion	BP	156	4	0.00353192	Fos, Fosb, Junb, Ppif
GO:0021543	pallium development	BP	156	4	0.00353192	Btg2, Nr4a3, Srf, Ndel1
GO:0032410	negative regulation of transporter activity	BP	77	3	0.00360749	Gem, Ppif, Rem2
GO:0034249	negative regulation of cellular amide metabolic process	BP	157	4	0.0036133	Btg2, Gapdh, Rgs2, Eprs
GO:0007167	enzyme linked receptor protein signaling pathway	BP	917	10	0.00364999	Bdnf, Egr1, Fos, Ccn1, Nr4a3, Tgif1, Zyx, Bambi, Ndel1, Tiparp
GO:0048635	negative regulation of muscle organ development	BP	78	3	0.00374103	Bdnf, Rgs2, Usp2
GO:0043486	histone exchange	BP	23	2	0.00374586	Ptma, Spty2d1
GO:0097346	INO80-type complex	CC	23	2	0.00374586	Tfpt, Actr5
GO:0034405	response to fluid shear stress	BP	23	2	0.00374586	Klf2, Ptgs2
GO:0090575	RNA polymerase II transcription regulator complex	CC	159	4	0.00377987	Fos, Junb, Taf10, Taf11
GO:0022607	cellular component assembly	BP	2646	20	0.0038446	Ap2m1, Bdnf, Cenpa, Rps2, Plk2, Srf, Surf6, Zyx, Taf10, Nubp2, Bag3, Ddx20, Myoz1, Nip7, Atg12, Taf11, Ndel1, Spty2d1, Npas4, Acd
GO:1901862	negative regulation of muscle tissue development	BP	79	3	0.00387755	Bdnf, Rgs2, Usp2
GO:1901214	regulation of neuron death	BP	375	6	0.00392384	Bdnf, Btg2, Egr1, Fos, Nr4a3, Nr4a2
GO:0003002	regionalization	BP	377	6	0.00402623	Btg2, Egr2, Pcdh8, Srf, Tgif1, Acd
GO:0000979	RNA polymerase II core promoter sequence-specific DNA bin...	MF	24	2	0.00407581	Egr1, Fos
GO:0001829	trophectodermal cell differentiation	BP	24	2	0.00407581	Junb, Srf
GO:0051128	regulation of cellular component organization	BP	2478	19	0.00416597	Ap2m1, Bdnf, Cdk11b, Mapkapk5, Ppp1r15a, Pcdh8, Rgs2, Plk2, Srf, Bag3, Siva1, Sertad1, Rassf1, Ndel1, Spty2d1, Ppif, Arid5a, Rhot2, Acd
GO:0016071	mRNA metabolic process	BP	642	8	0.00418122	Btg2, Cdk11b, Ddx20, Snrnp40, Cwc25, Tra2a, Dhx8, Leo1
GO:0051656	establishment of organelle localization	BP	380	6	0.00418351	Cenpa, Gem, Nr4a3, Nop9, Ndel1, Rhot2
GO:0048588	developmental cell growth	BP	266	5	0.00426916	Bdnf, Dclk1, Rgs2, Srf, Ndel1
GO:0030900	forebrain development	BP	383	6	0.0043453	Btg2, Dclk1, Nr4a3, Nr4a2, Srf, Ndel1
GO:0051051	negative regulation of transport	BP	511	7	0.0043898	Gem, Ptgs2, Rgs2, Bag3, Usp2, Ppif, Rem2
GO:0097367	carbohydrate derivative binding	MF	2123	17	0.00439602	Cdk11b, Dclk1, Gem, Ccn1, Sik1, Plk2, Nubp2, Ddx20, Eprs, Ube2j2, Rem2, Irgq, Rhot2, Dhx8, Arl4c, Gmppb, Gbp11
GO:0043523	regulation of neuron apoptotic process	BP	268	5	0.00440577	Bdnf, Btg2, Egr1, Nr4a3, Nr4a2
GO:0030687	preribosome, large subunit precursor	CC	25	2	0.00441877	Nip7, Wdr74
GO:0045595	regulation of cell differentiation	BP	1947	16	0.004473	Bdnf, Egr2, Fos, Ccn1, Junb, Mapkapk5, Sik1, Ptgs2, Rgs2, Plk2, Srf, Tgif1, Bambi, Ndel1, Leo1, Apold1
GO:0061564	axon development	BP	515	7	0.00457806	Bdnf, Dclk1, Egr2, Nr4a3, Nr4a2, Srf, Ndel1
GO:0034613	cellular protein localization	BP	1781	15	0.00472453	Ap2m1, Cenpa, Dclk1, Egr2, Ppp1r15a, Ptgs2, Bag3, Ppp1r3c, Pard6a, Fam53c, Nop9, Ndel1, Arl4c, Vps37b, Acd
GO:0031175	neuron projection development	BP	1109	11	0.00473773	Bdnf, Btg2, Dclk1, Egr2, Mapkapk5, Nr4a3, Nr4a2, Rgs2, Plk2, Srf, Ndel1
GO:0140272	exogenous protein binding	MF	26	2	0.00477462	Siva1, Pvr
GO:0044342	type B pancreatic cell proliferation	BP	26	2	0.00477462	Nr4a1, Nr4a3
GO:0001618	virus receptor activity	MF	26	2	0.00477462	Siva1, Pvr
GO:0097517	contractile actin filament bundle	CC	86	3	0.00491832	Zyx, Bag3, Tpm4
GO:0001725	stress fiber	CC	86	3	0.00491832	Zyx, Bag3, Tpm4
GO:0070727	cellular macromolecule localization	BP	1792	15	0.00499659	Ap2m1, Cenpa, Dclk1, Egr2, Ppp1r15a, Ptgs2, Bag3, Ppp1r3c, Pard6a, Fam53c, Nop9, Ndel1, Arl4c, Vps37b, Acd
GO:0019208	phosphatase regulator activity	MF	87	3	0.00507938	Ppp1r15a, Ppp1r3c, Myoz1
GO:0000469	cleavage involved in rRNA processing	BP	27	2	0.00514326	Nop9, Tbl3
GO:0060716	labyrinthine layer blood vessel development	BP	27	2	0.00514326	Ccn1, Junb
GO:0048745	smooth muscle tissue development	BP	27	2	0.00514326	Srf, Tiparp
GO:0071007	U2-type catalytic step 2 spliceosome	CC	27	2	0.00514326	Snrnp40, Dhx8
GO:0070925	organelle assembly	BP	811	9	0.00514529	Cenpa, Rps2, Plk2, Srf, Surf6, Bag3, Myoz1, Nip7, Atg12
GO:0006091	generation of precursor metabolites and energy	BP	397	6	0.00516213	Bdnf, Gapdh, Nr4a3, Ppp1r3c, Coq10b, Ppif
GO:0034620	cellular response to unfolded protein	BP	88	3	0.0052436	Ppp1r15a, Tbl2, Bag3
GO:0007369	gastrulation	BP	175	4	0.00530334	Nr4a3, Srf, Tgif1, Leo1
GO:0003714	transcription corepressor activity	MF	175	4	0.00530334	Btg2, Hr, Mlip, Arid5a
GO:0050821	protein stabilization	BP	176	4	0.00541031	Gapdh, Bag3, Usp2, Rassf1
GO:0005684	U2-type spliceosomal complex	CC	89	3	0.00541098	Snrnp40, Cwc25, Dhx8
GO:0030686	90S preribosome	CC	28	2	0.00552458	Nop9, Tbl3
GO:1901020	negative regulation of calcium ion transmembrane transpor...	BP	28	2	0.00552458	Gem, Rem2
GO:2000178	negative regulation of neural precursor cell proliferatio...	BP	28	2	0.00552458	Bdnf, Btg2
GO:0001525	angiogenesis	BP	534	7	0.00555697	Nr4a1, Ccn1, Klf2, Ptgs2, Plk2, Srf, Apold1
GO:0051346	negative regulation of hydrolase activity	BP	404	6	0.0056104	Gapdh, Nr4a1, Ppp1r15a, Ptgs2, Rgs2, Ppif
GO:0051649	establishment of localization in cell	BP	1999	16	0.00574086	Ap2m1, Cenpa, Slc29a2, Egr2, Gem, Nr4a3, Ptgs2, Bag3, Ppp1r3c, Fam53c, Nop9, Ndel1, Rhot2, Arl4c, Vps37b, Acd
GO:0071353	cellular response to interleukin-4	BP	29	2	0.00591848	Rps2, Impdh2
GO:0021952	central nervous system projection neuron axonogenesis	BP	29	2	0.00591848	Dclk1, Nr4a2
GO:0097345	mitochondrial outer membrane permeabilization	BP	29	2	0.00591848	Siva1, Rhot2
GO:0043524	negative regulation of neuron apoptotic process	BP	181	4	0.00596683	Bdnf, Btg2, Nr4a3, Nr4a2
GO:0044093	positive regulation of molecular function	BP	1481	13	0.00605578	Bdnf, Egr1, Ccn1, Rps2, Mapkapk5, Ppp1r15a, Nr4a2, Plk2, Srf, Gadd45g, Bambi, Ndel1, Acd
GO:1903313	positive regulation of mRNA metabolic process	BP	94	3	0.00629595	Btg2, Tra2a, Leo1
GO:0043153	entrainment of circadian clock by photoperiod	BP	30	2	0.00632485	Sik1, Usp2
GO:0032432	actin filament bundle	CC	95	3	0.00648266	Zyx, Bag3, Tpm4
GO:0042641	actomyosin	CC	95	3	0.00648266	Zyx, Bag3, Tpm4
GO:2001243	negative regulation of intrinsic apoptotic signaling path...	BP	95	3	0.00648266	Ptgs2, Tpt1, Ppif
GO:0005635	nuclear envelope	CC	418	6	0.00659155	Gapdh, Nr4a1, Ptgs2, Mlip, Tfpt, Ndel1
GO:0000132	establishment of mitotic spindle orientation	BP	31	2	0.00674359	Cenpa, Ndel1
GO:0045932	negative regulation of muscle contraction	BP	31	2	0.00674359	Ptgs2, Rgs2
GO:0033687	osteoblast proliferation	BP	31	2	0.00674359	Ccn1, Junb
GO:0009648	photoperiodism	BP	31	2	0.00674359	Sik1, Usp2
GO:0032212	positive regulation of telomere maintenance via telomeras...	BP	31	2	0.00674359	Mapkapk5, Acd
GO:0008157	protein phosphatase 1 binding	MF	31	2	0.00674359	Ppp1r15a, Ppp1r3c
GO:0070670	response to interleukin-4	BP	31	2	0.00674359	Rps2, Impdh2
GO:0090502	RNA phosphodiester bond hydrolysis, endonucleolytic	BP	31	2	0.00674359	Nop9, Tbl3
GO:0055114	oxidation-reduction process	BP	847	9	0.00677191	Bdnf, Gapdh, Hr, Nr4a3, Ptgs2, Impdh2, Ppp1r3c, Ogfod2, Coq10b
GO:1901653	cellular response to peptide	BP	298	5	0.00684679	Nr4a1, Nr4a3, Nr4a2, Ndel1, Eprs
GO:0060322	head development	BP	699	8	0.00688278	Btg2, Dclk1, Egr2, Nr4a3, Nr4a2, Srf, Ndel1, Tiparp
GO:0072594	establishment of protein localization to organelle	BP	422	6	0.00689345	Ap2m1, Ptgs2, Bag3, Fam53c, Vps37b, Acd
GO:0001764	neuron migration	BP	189	4	0.00693444	Dclk1, Nr4a2, Srf, Ndel1
GO:0021761	limbic system development	BP	98	3	0.00706249	Btg2, Nr4a3, Srf
GO:0009649	entrainment of circadian clock	BP	32	2	0.00717459	Sik1, Usp2
GO:0035035	histone acetyltransferase binding	MF	32	2	0.00717459	Egr1, Nr4a3
GO:0001893	maternal placenta development	BP	32	2	0.00717459	Junb, Ptgs2
GO:0010614	negative regulation of cardiac muscle hypertrophy	BP	32	2	0.00717459	Rgs2, Mlip
GO:1902110	positive regulation of mitochondrial membrane permeabilit...	BP	32	2	0.00717459	Siva1, Rhot2
GO:0048384	retinoic acid receptor signaling pathway	BP	32	2	0.00717459	Klf2, Tgif1
GO:0005669	transcription factor TFIID complex	CC	32	2	0.00717459	Taf10, Taf11
GO:0043502	regulation of muscle adaptation	BP	99	3	0.00726239	Nr4a3, Rgs2, Mlip
GO:0044391	ribosomal subunit	CC	192	4	0.00732249	Rps2, Rps17, Rpl7a, Rpl37
GO:0051169	nuclear transport	BP	305	5	0.00752986	Egr2, Ptgs2, Bag3, Fam53c, Nop9
GO:0006913	nucleocytoplasmic transport	BP	305	5	0.00752986	Egr2, Ptgs2, Bag3, Fam53c, Nop9
GO:0002675	positive regulation of acute inflammatory response	BP	33	2	0.00761776	Ptgs2, C2cd4b
GO:0006352	DNA-templated transcription, initiation	BP	101	3	0.00767217	Srf, Taf10, Taf11
GO:0001704	formation of primary germ layer	BP	101	3	0.00767217	Nr4a3, Srf, Leo1
GO:0032092	positive regulation of protein binding	BP	101	3	0.00767217	Bdnf, Plk2, Bambi
GO:0016051	carbohydrate biosynthetic process	BP	196	4	0.00786183	Gapdh, Sik1, Ppp1r3c, B3gnt8
GO:0005681	spliceosomal complex	CC	196	4	0.00786183	Snrnp40, Cwc25, Tra2a, Dhx8
GO:0007006	mitochondrial membrane organization	BP	102	3	0.00788208	Siva1, Ppif, Rhot2
GO:1990138	neuron projection extension	BP	197	4	0.00800063	Bdnf, Dclk1, Srf, Ndel1
GO:0097718	disordered domain specific binding	MF	34	2	0.00807299	Ap2m1, Gapdh
GO:0014741	negative regulation of muscle hypertrophy	BP	34	2	0.00807299	Rgs2, Mlip
GO:0003300	cardiac muscle hypertrophy	BP	103	3	0.00809537	Nr4a3, Rgs2, Mlip
GO:0050772	positive regulation of axonogenesis	BP	103	3	0.00809537	Bdnf, Srf, Ndel1
GO:1901700	response to oxygen-containing compound	BP	1538	13	0.00820005	Egr1, Egr2, Fos, Fosl2, Nr4a1, Nr4a3, Nr4a2, Ptgs2, Ndel1, Ppif, Eprs, Arid5a, Npas4
GO:0006839	mitochondrial transport	BP	199	4	0.00828304	Bag3, Siva1, Ppif, Rhot2
GO:0051049	regulation of transport	BP	1897	15	0.0082935	Ap2m1, Gapdh, Gem, Sik1, Nr4a3, Ptgs2, Rgs2, Bag3, Siva1, Usp2, Pard6a, Ndel1, Ppif, Eprs, Rem2
GO:0090066	regulation of anatomical structure size	BP	577	7	0.00834475	Ap2m1, Bdnf, Ppp1r15a, Ptgs2, Rgs2, Srf, Ndel1
GO:0051099	positive regulation of binding	BP	200	4	0.00842666	Bdnf, Plk2, Bambi, Acd
GO:0040001	establishment of mitotic spindle localization	BP	35	2	0.00854018	Cenpa, Ndel1
GO:0060292	long-term synaptic depression	BP	35	2	0.00854018	Plk2, Srf
GO:0000462	maturation of SSU-rRNA from tricistronic rRNA transcript ...	BP	35	2	0.00854018	Nop9, Tbl3
GO:0045987	positive regulation of smooth muscle contraction	BP	35	2	0.00854018	Ptgs2, Srf
GO:0051973	positive regulation of telomerase activity	BP	35	2	0.00854018	Mapkapk5, Acd
GO:1904358	positive regulation of telomere maintenance via telomere ...	BP	35	2	0.00854018	Mapkapk5, Acd
GO:0051146	striated muscle cell differentiation	BP	316	5	0.00869713	Bdnf, Sik1, Rgs2, Srf, Myoz1
GO:0035282	segmentation	BP	106	3	0.00875552	Egr2, Pcdh8, Acd
GO:0016607	nuclear speck	CC	318	5	0.00892207	Bdnf, Nr4a2, Snrnp40, Cwc25, Unc45a
GO:0014897	striated muscle hypertrophy	BP	107	3	0.00898239	Nr4a3, Rgs2, Mlip
GO:0071705	nitrogen compound transport	BP	2099	16	0.0090004	Ap2m1, Bdnf, Slc29a2, Egr2, Gapdh, Ptgs2, Rgs2, Bag3, Ppp1r3c, Pard6a, Fam53c, Nop9, Ndel1, Arl4c, Vps37b, Acd
GO:0045786	negative regulation of cell cycle	BP	447	6	0.00901215	Btg2, Nr4a1, Ptgs2, Plk2, Rassf1, Hinfp
[truncated: 383 more rows]

## Sheet: GK1t vs. GS1t, GO-down
ID	Term	Ont	N	Down	P.Down	Genes.Down
[truncated: 361 more rows]

[truncated: 30 more sheets: GK1t vs. GS1t, KEGG-up, GK1t vs. GS1t, KEGG-down, NK24t vs. NS24t, Plots, NK24t vs. NS24t, Top-up, NK24t vs. NS24t, Top-down, NK24t vs. NS24t, GO-up, NK24t vs. NS24t, GO-down, NK24t vs. NS24t, KEGG-up, NK24t vs. NS24t, KEGG-down, GK24t vs. GS24t, Plots, GK24t vs. GS24t, Top-up, GK24t vs. GS24t, Top-down, GK24t vs. GS24t, GO-up, GK24t vs. GS24t, GO-down, GK24t vs. GS24t, KEGG-up, GK24t vs. GS24t, KEGG-down, NK3m vs. NS3m, Plots, NK3m vs. NS3m, Top-up, NK3m vs. NS3m, Top-down, NK3m vs. NS3m, GO-up …]
