# Supplementary material for: A stage-resolved neuron-glia transcriptional atlas reveals a glial inflammatory pivot in epilepsy
Source: Research Square preprint supplement (doi:10.21203/rs.3.rs-8807447/v1), 2026-02-20
Supplement: Supplementary file 2 [file 9de0ce09fbbc2872c9fc2cea.xlsx]

## Sheet: Sheet1
Differentially expressed genes in neurons and glia at 1hpi
Neurons
Gene symbol	logFC	FDR	Gene description
Upregulated
Btg2	4.35213	1.29193e-13	BTG anti-proliferation factor 2; transcriptional co-regulator that restrains cell growth and supports differentiation and activity-dependent plasticity.
Ptgs2	3.14273	1.29193e-13	Prostaglandin-endoperoxide synthase-2 (cyclooxygenase-2); enzyme in prostaglandin synthesis mediating inflammation and neuronal responses.
Arl5b	1.96777	1.29193e-13	ADP-ribosylation factor-like protein 5B; small GTPase involved in endosome-to-Golgi trafficking and vesicle dynamics.
Nr4a2	4.05948	1.29193e-13	Nuclear receptor subfamily 4 group A member 2 (Nurr1); activity-induced transcription factor for neuronal survival and dopaminergic development.
4931440P22Rik	4.54446	1.29193e-13	RIKEN cDNA 4931440P22 gene; predicted/uncharacterized protein-coding locus.
Tiparp	3.54823	1.29193e-13	TCDD-inducible poly(ADP-ribose) polymerase (mono-ADP-ribosyltransferase); repressor that modifies proteins and modulates transcription.
Nr4a3	3.28826	1.29193e-13	Nuclear receptor subfamily 4 group A member 3 (NOR-1); immediate-early transcription factor regulating metabolism, survival, and plasticity.
Jun	1.69861	1.29193e-13	AP-1 transcription factor subunit; stress- and activity-induced regulator of proliferation, differentiation, and synaptic plasticity.
Errfi1	2.01691	1.29193e-13	ERBB receptor feedback inhibitor 1 (Mig6); negative regulator of EGFR/ERBB signaling that attenuates mitogenic pathways.
Cdk11b	1.72495	1.29193e-13	Cyclin-dependent kinase 11B; serine/threonine kinase implicated in cell cycle control and RNA processing.
Fosl2	3.00763	1.29193e-13	FOS-like 2 (AP-1 subunit); transcriptional regulator controlling proliferation and differentiation programs.
Rpl21	2.10539	1.29193e-13	Ribosomal protein L21; component of the 60S large ribosomal subunit required for cytosolic translation.
Rasl11a	3.96277	1.29193e-13	RAS-like family 11 member A; small GTPase linked to growth regulation and differentiation.
Egr4	4.29329	1.29193e-13	Early growth response 4; zinc-finger transcription factor induced by neuronal activity.
Fosb	5.22769	1.29193e-13	FOSB (AP-1 subunit); immediate-early transcription factor involved in neuronal plasticity and stress responses.
Ppp1r15a	2.65116	1.29193e-13	Protein phosphatase 1 regulatory subunit 15A (GADD34); stress-inducible PP1 adaptor that dephosphorylates eIF2α to restart translation.
Spty2d1	3.26002	1.29193e-13	SPTY2D1; chromatin-associated transcriptional regulator implicated in gene expression control.
Junb	4.14584	1.29193e-13	JUNB (AP-1 subunit); transcription factor modulating cell cycle, immune, and stress responses.
Mlip	2.62683	1.29193e-13	Muscle-enriched lamin-interacting protein; nuclear envelope–associated regulator of gene expression and signaling.
Rassf1	2.15886	1.29193e-13	RAS association domain family member 1; tumor suppressor affecting microtubules and cell cycle checkpoints.
Sgk1	1.8062	1.29193e-13	Serum/glucocorticoid-regulated kinase 1; kinase integrating stress and hormonal signals, modulating ion transport and transcription.
Mir212	5.74148	1.29193e-13	microRNA-212; activity-regulated miRNA influencing neuronal plasticity and dendritic growth.
Cwc25	2.27623	1.29193e-13	Pre-mRNA splicing factor CWC25 homolog; factor required for spliceosome activation.
Fbxo33	2.58241	1.29193e-13	F-box protein 33; SCF ubiquitin ligase component targeting proteins for degradation.
Fos	4.96068	1.29193e-13	AP-1 transcription factor; immediate-early regulator of activity-dependent gene programs.
Gadd45g	3.99214	1.29193e-13	Growth arrest and DNA-damage-inducible protein 45 gamma; stress-responsive regulator of MAPK signaling and epigenetic plasticity.
Nfil3	2.73173	1.29193e-13	Nuclear factor, interleukin-3 regulated (E4BP4); transcription factor involved in circadian and immune regulation.
Plk2	1.87644	1.29193e-13	Polo-like kinase 2; serine/threonine kinase in centriole/synaptic homeostasis and activity-dependent remodeling.
Sap18	2.11656	1.29193e-13	SIN3A-associated protein 18 kDa; transcriptional corepressor within histone deacetylase complexes.
Pcdh8	2.18297	1.29193e-13	Protocadherin-8; cell-adhesion molecule implicated in neuronal connectivity.
Arc	3.93432	1.29193e-13	Activity-regulated cytoskeleton-associated protein; synaptic plasticity/long-term memory effector and mRNA transport component.
Nr4a1	4.21904	1.29193e-13	Nuclear receptor subfamily 4 group A member 1 (Nur77); immediate-early transcription factor in apoptosis, metabolism, and plasticity.
Adamts1	3.18716	1.29193e-13	ADAMTS metalloprotease 1; secreted ECM remodeler with thrombospondin motifs.
Dusp1	3.81707	1.29193e-13	Dual-specificity phosphatase 1 (MKP-1); MAPK phosphatase that terminates stress-activated signaling.
Sik1	2.34317	1.29193e-13	Salt-inducible kinase 1; AMPK-family kinase regulating CREB-dependent transcription and metabolism.
Npas4	6.53889	1.29193e-13	Neuronal PAS domain protein 4; activity-dependent transcription factor that enhances inhibitory synapse formation and neuroprotection.
Ovca2	2.00581	1.25701e-12	Ovarian carcinoma antigen 2 homolog; putative hydrolase, poorly characterized.
Dusp5	2.05258	1.8359e-12	Dual-specificity phosphatase 5; nuclear ERK-directed phosphatase providing negative feedback to MAPK signaling.
Dusp6	1.95252	2.02734e-12	Dual-specificity phosphatase 6 (MKP-3); cytosolic ERK phosphatase mediating FGF/MAPK feedback control.
Rpl22l1	2.24632	2.09293e-12	Ribosomal protein L22-like 1; ribosome-associated factor in translation/biogenesis.
C2cd4b	2.72293	2.15532e-12	C2 calcium-dependent domain-containing protein 4B; signaling protein with C2 domain; function incompletely defined.
Rgs4	1.77993	2.43621e-12	Regulator of G-protein signaling 4; GAP that terminates GPCR signaling in neurons, shaping excitability.
Irs2	1.61319	2.8122e-12	Insulin receptor substrate 2; adaptor in insulin/IGF signaling controlling survival and metabolism.
Kctd12	1.28799	3.38251e-12	Potassium channel tetramerization domain-containing 12; modulator of GABA_B receptor signaling and neuronal excitability.
Kcnj2	2.23995	3.92747e-12	Inward-rectifier potassium channel Kir2.1; sets resting membrane potential/excitability.
Slc16a1	1.76562	4.34762e-12	Monocarboxylate transporter 1 (MCT1); proton-linked lactate/pyruvate transporter.
Trib1	2.94458	6.63007e-12	Tribbles pseudokinase 1; scaffold/pseudokinase modulating MAPK and lipid metabolism pathways.
Nap1l5	1.62348	1.07553e-11	Nucleosome assembly protein 1-like 5; imprinted, brain-enriched regulator of transcription/chromatin.
Csrnp1	1.75304	2.5248e-11	Cysteine-serine-rich nuclear protein 1; transcription factor associated with apoptosis and development.
Gadd45b	2.65538	4.13004e-11	Growth arrest and DNA-damage-inducible protein 45 beta; stress/learning-related epigenetic and MAPK regulator.
Siah2	1.36735	6.90346e-11	E3 ubiquitin-protein ligase SIAH2; hypoxia- and stress-responsive proteostasis regulator.
Egr1	2.70515	1.51424e-10	Early growth response 1; immediate-early zinc-finger transcription factor controlling plasticity and growth.
Cited2	2.07523	1.63134e-10	Cbp/p300-interacting transactivator with Glu/Asp-rich C-terminus 2; transcriptional co-regulator in development and hypoxia signaling.
Tpt1	1.59931	2.37112e-10	Translationally controlled tumor protein (TCTP); chaperone-like regulator of growth and apoptosis.
Ccnk	1.40813	2.41849e-10	Cyclin K; partner of CDK12/13 in transcription elongation and DNA damage response.
Emd	2.80335	2.57961e-10	Emerin; inner nuclear membrane protein maintaining nuclear architecture (Emery–Dreifuss MD gene).
Mir132	5.30561	2.66817e-10	microRNA-132; activity-regulated miRNA promoting dendritic growth and synaptic plasticity.
Casp3	1.55251	4.94845e-10	Caspase-3; executioner caspase mediating apoptosis.
Arl4d	2.99517	7.64253e-10	ADP-ribosylation factor-like 4D; small GTPase in membrane trafficking/cytoskeleton dynamics.
Coq10b	1.66983	1.37412e-09	Coenzyme Q-binding protein homolog B; mitochondrial factor linked to CoQ homeostasis.
Srp14	1.57017	1.38873e-09	Signal recognition particle 14 kDa subunit; co-translational targeting of nascent peptides to ER.
H3c6	4.09125	2.74758e-09	Histone H3 clustered gene 6; core nucleosome component involved in chromatin structure.
Josd1	1.03868	3.74453e-09	Josephin domain-containing protein 1; deubiquitinase participating in ubiquitin processing.
Rheb	1.14928	3.86988e-09	Ras homolog enriched in brain; small GTPase that activates mTORC1 signaling.
Gm13889	1.72786	6.9634e-09	Predicted gene 13889; uncharacterized mouse locus.
Dbpht2	1.31292	7.95234e-09	Diphthamide biosynthesis protein 2 homolog; modifies eEF2 for translation fidelity.
Ina	1.31451	1.09864e-08	Alpha-internexin; neuronal intermediate filament supporting axonal structure.
1700086L19Rik	1.56936	2.05479e-08	RIKEN cDNA 1700086L19 gene; predicted/uncharacterized locus.
Lrrtm2	1.38262	2.05479e-08	Leucine-rich repeat transmembrane neuronal protein 2; synapse organizer influencing excitatory connectivity.
Ciart	1.46311	2.53319e-08	Circadian associated repressor of transcription; clock-linked repressor modulating rhythmic gene expression.
Ier2	2.26961	2.87299e-08	Immediate early response protein 2; activity-induced transcriptional regulator.
Arf4	0.995569	3.18771e-08	ADP-ribosylation factor 4; small GTPase in vesicle trafficking between Golgi/ER.
Tent5a	2.03817	3.45237e-08	Terminal nucleotidyltransferase 5A; non-canonical poly(A) polymerase adding tails to cytoplasmic mRNAs.
Jund	1.36936	8.48126e-08	JunD (AP-1 subunit); stress-responsive transcription factor modulating proliferation and survival.
Rgs2	2.02782	9.07175e-08	Regulator of G-protein signaling 2; GAP that attenuates Gαq/Gs signaling; roles in cardiovascular/neural function.
Pvr	1.53574	9.07175e-08	Poliovirus receptor (nectin-like 5); adhesion/signaling receptor with immune checkpoint roles.
Tsc22d1	1.28031	9.12327e-08	TSC22 domain family protein 1; leucine zipper transcriptional regulator in stress/glucocorticoid responses.
Alkal2	1.89097	1.38122e-07	ALK/LTK ligand 2; secreted growth factor activating ALK/LTK receptors in neurodevelopment.
Chmp1b	1.62073	2.0092e-07	Charged multivesicular body protein 1B; ESCRT-III component in endosomal sorting and membrane remodeling.
Eprs	0.805757	2.23085e-07	Bifunctional glutamyl-prolyl-tRNA synthetase; aminoacylation enzyme and GAIT-complex mediator of translational control.
Klf4	4.89979	4.49905e-07	Krüppel-like factor 4; transcription factor controlling differentiation, barrier function, and reprogramming.
Homer1	1.18745	5.8423e-07	Homer scaffolding protein 1; postsynaptic scaffold linking mGluRs to Ca²⁺ signaling; synaptic plasticity.
Egr2	3.11832	6.49782e-07	Early growth response 2; transcription factor essential for peripheral nerve myelination.
Tinf2	1.21625	7.25776e-07	TERF1-interacting nuclear factor 2; shelterin component that safeguards telomere integrity.
Gpr19	1.06138	8.17636e-07	Orphan G protein-coupled receptor 19; brain-expressed GPCR with incompletely defined signaling.
Zfand5	0.906204	8.51077e-07	Zinc finger AN1-type domain-containing protein 5; proteasome activator in stress and muscle atrophy responses.
Chaserr	0.986124	8.56608e-07	CHASERR (lncRNA); negative regulator of CHD2 affecting chromatin accessibility.
Gmppb	1.52099	9.86225e-07	GDP-mannose pyrophosphorylase B; glycosylation enzyme; deficiency causes congenital muscular dystrophy.
Spry2	1.9913	9.89842e-07	Sprouty 2; RTK/MAPK signaling antagonist shaping growth factor responses.
Nefl	1.09529	1.32389e-06	Neurofilament light polypeptide; axonal cytoskeletal component and biomarker of neurodegeneration.
Nop53	1.39823	1.32811e-06	NOP53 ribosome biogenesis factor; nucleolar protein linked to p53 pathway and rRNA processing.
Pard6a	1.70628	3.30453e-06	PAR-6 family cell polarity regulator alpha; tight junction and polarity assembly protein.
Inpp5f	0.794651	3.90504e-06	Inositol polyphosphate-5-phosphatase F; phosphoinositide phosphatase regulating endocytic trafficking and PI signaling.
Dusp4	1.76009	3.90504e-06	Dual-specificity phosphatase 4; MAPK phosphatase that inactivates ERK/JNK pathways.
Rasd1	1.50138	7.21438e-06	RAS, dexamethasone-induced 1; small GTPase involved in circadian/stress signaling and cAMP responses.
Impdh2	1.23772	8.79402e-06	Inosine-5′-monophosphate dehydrogenase 2; rate-limiting enzyme for guanine nucleotide biosynthesis.
Maff	4.5114	1.0832e-05	MAF basic leucine zipper transcription factor F; small MAF partner in oxidative stress responses.
Blvrb	1.38861	2.50083e-05	Biliverdin reductase B; flavin-dependent reductase in heme catabolism/redox metabolism.
Scg2	1.90026	2.97816e-05	Secretogranin II; neuroendocrine granin and neuropeptide precursor.
Piga	1.34072	3.14571e-05	Phosphatidylinositol glycan anchor biosynthesis class A; initiating subunit of GPI-anchor biosynthesis.
Gm17971	2.2473	3.34324e-05	Predicted gene 17971; uncharacterized locus with limited annotation.
Tnfrsf23	2.57928	4.93004e-05	Tumor necrosis factor receptor superfamily member 23; decoy receptor that modulates TNF ligand signaling and cell-death pathways.
Taf13	1.79266	5.07496e-05	TATA-box binding protein–associated factor 13; subunit of the TFIID general transcription factor complex required for RNA polymerase II initiation.
Cenpa	3.19957	5.35998e-05	Centromere protein A; histone H3 variant that replaces canonical histone H3 in centromeric nucleosomes, ensuring chromosome segregation.
N4bp2l1	0.811818	5.3672e-05	NEDD4-binding protein 2-like 1; adaptor protein that modulates ubiquitination and receptor trafficking.
Fbl	1.18128	5.3672e-05	Fibrillarin; nucleolar methyltransferase catalyzing 2′-O-methylation of pre-rRNA during ribosome biogenesis.
Kif18a	2.41728	6.96404e-05	Kinesin family member 18A; mitotic motor driving chromosome alignment and spindle organization.
Hspa14	0.874994	7.4373e-05	Heat-shock protein A14; ribosome-associated chaperone maintaining protein folding under translational stress.
Hspa14	1.41942	0.000108771	Heat-shock protein A14 (duplicate); same ribosome-associated chaperone involved in co-translational quality control.
Arid5a	1.36056	0.000116258	AT-rich interaction domain–containing protein 5A; RNA-stabilizing factor that regulates inflammatory mRNA turnover.
Aldh1a3	4.58153	0.0001469	Aldehyde dehydrogenase 1 family A3; retinaldehyde dehydrogenase generating retinoic acid for differentiation and development.
Snora31	1.82516	0.000153924	Small nucleolar RNA 31; C/D-box snoRNA guiding rRNA methylation.
Ptp4a1	2.20283	0.000160713	Protein tyrosine phosphatase type IVA member 1; prenylated phosphatase promoting migration and proliferation.
Smad7	1.26692	0.000160713	SMAD family member 7; inhibitory SMAD that antagonizes TGF-β/SMAD signaling.
Mest	1.13724	0.000162062	Mesoderm-specific transcript (Mest); imprinted regulator of adipogenesis and fetal growth.
Gm16044	1.8266	0.000193388	Predicted gene Gm16044; uncharacterized transcript.
Areg	5.26447	0.000197034	Amphiregulin; epidermal growth factor receptor ligand stimulating proliferation and tissue repair.
Ghsr	2.02584	0.000216937	Growth hormone secretagogue receptor (Ghsr); ghrelin receptor regulating appetite and metabolism.
Sap18b	1.47548	0.000216937	SIN3A-associated protein 18B; transcriptional corepressor related to SAP18.
Midn	1.51041	0.000230655	Midnolin; nucleolar protein involved in neurite outgrowth and proteostasis.
Btg1	0.846081	0.000330024	BTG anti-proliferation factor 1; transcriptional co-regulator restricting proliferation and supporting differentiation.
Cdkn1a	2.17943	0.000458414	Cyclin-dependent kinase inhibitor 1A (p21); p53-inducible CDK inhibitor mediating cell-cycle arrest after DNA damage.
Fam107b	1.11484	0.000462459	Family with sequence similarity 107 member B; actin-binding growth suppressor enriched in CNS.
Fbxw7	0.685073	0.000467744	F-box/WD-repeat domain-containing protein 7; ubiquitin ligase targeting cyclin E, MYC and Notch for degradation.
Rap2a	0.863259	0.000495288	RAS-related protein Rap2A; small GTPase modulating actin dynamics and vesicle trafficking.
Ythdc1	0.898694	0.000587837	YTH domain-containing 1; nuclear m6A RNA-binding protein regulating splicing and export.
Plpp6	0.844425	0.000706698	Phospholipid phosphatase 6; enzyme controlling bioactive lipid phosphate levels.
Fth1	1.15234	0.000764768	Ferritin heavy chain 1; iron-storage protein providing antioxidant protection.
Gm24119	1.77303	0.000913389	Predicted gene Gm24119; uncharacterized locus.
Plk3	1.02335	0.00113312	Polo-like kinase 3; stress-activated kinase involved in checkpoint signaling.
Ubald1	0.685369	0.00114935	Ubiquitin-associated-like domain-containing 1; ubiquitin-binding adaptor in proteostasis.
Gla	1.18845	0.00122045	Alpha-galactosidase A; lysosomal hydrolase degrading globotriaosylceramide (defective in Fabry disease).
Gpr3	1.17403	0.0012734	G-protein-coupled receptor 3; constitutively active GPCR elevating cAMP in brain and oocytes.
B3galt2	1.0224	0.00129435	Beta-1,3-galactosyltransferase 2; glycosyltransferase catalyzing galactose transfer in glycolipid biosynthesis.
Sap30	1.59345	0.00159765	SIN3A-associated protein 30 (SAP30); transcriptional corepressor bridging HDAC complexes.
Tyw3	0.977909	0.00182532	tRNA wybutosine-synthetase 3 homolog; enzyme forming wybutosine modification on tRNAPhe.
Kcnf1	1.07282	0.00233877	Potassium channel subfamily F member 1; voltage-gated potassium channel subunit contributing to excitability.
Atf3	3.81666	0.00236694	Activating transcription factor 3; stress-inducible transcription factor mediating adaptive responses.
Ccn1	1.83925	0.00240828	Cysteine-rich angiogenic inducer 61 (CCN1); extracellular matrix-associated signaling protein promoting angiogenesis.
Vgf	0.96154	0.00293657	VGF nerve growth factor–inducible protein; neuropeptide precursor involved in synaptic plasticity and energy balance.
Egr3	1.0744	0.00307063	Early growth response 3; immediate-early transcription factor controlling neuronal differentiation.
Grasp	0.689622	0.00309624	GRASP (GRP1-associated scaffold protein); adaptor in ARF-GTPase signaling and membrane traffic.
Irf2bp2	1.06503	0.00312937	Interferon regulatory factor 2-binding protein 2; transcriptional co-repressor modulating immune gene expression.
Per1	1.27744	0.0036776	Period 1; core circadian clock transcriptional regulator.
Tulp2	2.24968	0.00389555	Tubby-like protein 2; protein implicated in intracellular trafficking and photoreceptor function.
Krt16	6.42089	0.00430729	Keratin 16; intermediate filament expressed in stressed epithelia.
Plpbp	0.604314	0.00453657	Pyridoxal phosphate-binding protein; enzyme in vitamin B6 metabolism.
Rasl11b	0.879527	0.00530059	RAS-like family 11 member B; small GTPase of uncertain function.
H3c7	4.17568	0.00530059	Histone H3 cluster 7; nucleosomal core component maintaining chromatin structure.
Wdr45b	0.658391	0.0054288	WD-repeat domain 45B; autophagy-related membrane trafficking regulator.
Ndel1	0.634218	0.00545402	Nuclear distribution element–like 1; dynein-associated adaptor guiding neuronal migration.
Zdbf2	1.04489	0.00570256	Zinc-finger DBF-type containing 2; epigenetic regulator affecting imprinting and growth.
Ccdc174	0.819586	0.00653111	Coiled-coil domain–containing 174; spliceosome-associated nuclear protein.
Bdnf	1.58948	0.00729484	Brain-derived neurotrophic factor; neurotrophin promoting survival, differentiation, and synaptic plasticity.
Nptx2	1.0442	0.00808167	Neuronal pentraxin 2; secreted synaptic protein clustering AMPA receptors.
Slc25a3	0.636425	0.0099131	Solute carrier family 25 member 3; mitochondrial phosphate carrier essential for ATP synthesis.
St8sia4	0.937356	0.0118421	ST8 alpha-N-acetyl-neuraminide transferase 4; polysialyltransferase modifying NCAM in neural development.
Spaar	3.15167	0.0123272	Small peptide regulator of actin-associated RNA (Spaar); regulator of muscle metabolism.
Arpp19	0.71621	0.0125159	Cyclic AMP-regulated phosphoprotein 19; phosphatase-binding regulator influencing neuronal signaling.
Rpl9	0.872418	0.0142415	Ribosomal protein L9; 60S subunit structural protein.
Kti12	0.90357	0.0177566	KTI12 homolog; RNA polymerase II regulator.
Mn1	0.966305	0.0191663	Meningioma 1; transcriptional co-activator and tumor suppressor.
Gm15381	2.19614	0.0196653	Predicted gene Gm15381; uncharacterized locus.
Frmd6	0.606754	0.0209814	FERM domain-containing 6; cytoskeletal adaptor influencing Hippo signaling.
Snhg1	0.987964	0.0209814	Small nucleolar RNA host gene 1; long non-coding RNA scaffolding snoRNP complexes.
Dnajb1	0.819341	0.0213264	DNAJ heat-shock protein family (B) member 1; Hsp40 co-chaperone assisting Hsp70 folding.
Mt1	1.12046	0.0216917	Metallothionein 1; cysteine-rich protein binding metals and scavenging reactive oxygen species.
Zfp869	0.699217	0.0229388	Zinc-finger protein 869; KRAB-domain transcriptional repressor.
Ddx3y	0.593513	0.0252182	DEAD-box helicase 3 Y-linked; RNA helicase required for translation initiation.
Auh	0.557097	0.0274275	AUH methylglutaconyl-CoA hydratase; leucine-catabolic enzyme and RNA-binding factor.
Foxg1	0.512213	0.028534	Forkhead box G1; transcription factor critical for forebrain patterning and neuronal maturation.
Tob2	0.816715	0.0287674	TOB2 antiproliferative protein; mRNA-deadenylation factor limiting proliferation.
Ubc	0.67508	0.0311338	Ubiquitin C; polyubiquitin precursor replenishing ubiquitin pool.
Pmaip1	4.19609	0.0324455	Phorbol-12-myristate-13-acetate–induced protein 1 (NOXA); BH3-only pro-apoptotic regulator.
Atp5d	0.58821	0.0332683	ATP synthase subunit δ; catalytic component of mitochondrial F1 ATPase.
Bcl2l11	1.21603	0.0332838	BCL2-like 11 (BIM); BH3-only protein inducing apoptosis via mitochondrial outer-membrane permeabilization.
Pcna	0.978378	0.0332953	Proliferating cell nuclear antigen; DNA-polymerase sliding clamp in replication and repair.
Ranbp2	0.651867	0.0332953	RAN-binding protein 2; nuclear-pore complex component regulating transport and SUMOylation.
Cdkn1b	1.24128	0.0350775	Cyclin-dependent kinase inhibitor 1B (p27 Kip1); CDK inhibitor restraining G1/S transition.
Kdm6b	0.727054	0.0360667	KDM6B (JMJD3); histone H3K27 demethylase promoting transcriptional activation.
Otud1	0.992629	0.0367673	OTU domain-containing deubiquitinase 1; deubiquitinase regulating NF-κB and oxidative stress responses.
C9orf72	0.659197	0.038103	Chromosome 9 open reading frame 72 (C9orf72); regulator of vesicle trafficking and autophagy, ALS/FTD gene.
Yap1	1.36504	0.039317	Yes-associated protein 1 (YAP1); transcriptional co-activator in Hippo signaling controlling growth and regeneration.
Gm7909	2.61316	0.0415919	Predicted gene Gm7909; uncharacterized locus.
Cnpy1	6.14152	0.0417102	Canopy FGF signaling regulator 1; ER chaperone modulating FGF-receptor maturation.
3930402G23Rik	2.72311	0.0417102	Predicted gene 3930402G23Rik; uncharacterized locus.
Gm34821	5.46551	0.0425333	Predicted gene Gm34821; uncharacterized locus.
Zfp957	5.99783	0.0425333	Zinc-finger protein 957; KRAB-domain transcriptional repressor.
Tra2b	0.44156	0.0442873	Transformer 2 beta homolog; RNA-splicing regulator in neurons and germ cells.
Ifrd1	0.682769	0.048324	Interferon-related developmental regulator 1; transcriptional co-regulator induced by interferons.
Olfr1385	6.06608	0.048521	Olfactory receptor 1385; G-protein-coupled receptor detecting odorants.
Snu13	0.719917	0.0490477	Small nuclear ribonucleoprotein SNU13; core component of U4/U5/U6 snRNP complexes essential for splicing
Downregulated
Vash1	-1.42085	1.3858e-06	Vasohibin-1; angiogenesis regulator induced by VEGF, functions as anti-angiogenic feedback factor in endothelial cells
Parp3	-3.8504	1.56102e-06	Poly(ADP-ribose) polymerase 3; DNA damage-responsive ADP-ribosyltransferase involved in base-excision repair and cell-cycle checkpoints
Mrc2	-2.10238	3.94031e-06	Mannose receptor C-type 2; endocytic lectin receptor implicated in collagen turnover and tissue remodeling
AI115009	-1.12716	3.05364e-05	AI115009; predicted non-coding transcript, limited annotation
Gja5	-1.55859	3.26221e-05	Gap junction protein alpha-5 (Connexin-40); gap-junction channel protein in vascular and cardiac conduction tissues
Scarna13	-1.63586	3.59427e-05	Small Cajal body-specific RNA 13; Cajal-body–localized small nuclear RNA involved in snRNA modification
Septin1	-1.2834	0.000484199	Septin-1; GTP-binding cytoskeletal filament protein regulating cytokinesis and membrane dynamics
Palb2	-2.02336	0.000587837	Partner and localizer of BRCA2; DNA-repair scaffold essential for homologous recombination and genome stability
Vsig8	-3.67668	0.000935339	V-set and immunoglobulin domain-containing 8; cell-surface protein involved in epithelial and immune signaling (poorly characterized)
Rpl10a	-0.830468	0.00233807	Ribosomal protein L10A; structural component of 60S ribosomal subunit
Zfp418	-1.32413	0.00287288	Zinc-finger protein 418; transcriptional regulator, likely KRAB-domain repressor (limited functional annotation)
Zcchc3	-0.736218	0.00319087	Zinc-finger CCHC-type containing 3; antiviral RNA-sensing and interferon-stimulated protein regulating innate immune responses
BC016579	-6.04815	0.00421711	Predicted gene BC016579; uncharacterized transcript
Gm5106	-6.53639	0.00554358	Gm5106; predicted non-coding RNA, unknown function
Mplkip	-0.862815	0.0100831	M-phase specific PLK1 interacting protein; centrosomal protein supporting mitotic progression
Dennd2d	-3.47792	0.0116175	DENN domain–containing 2D; Rab-GEF family member involved in endosomal membrane trafficking
Med18	-0.802143	0.0116175	Mediator complex subunit 18; transcriptional co-activator required for RNA Pol II initiation
Fbxl8	-1.31296	0.0118421	F-box/LRR protein 8; ubiquitin-ligase substrate recognition subunit targeting proteins for degradation
Gm10814	-1.55912	0.0125159	Gm10814; predicted gene with unknown function
Ing4	-0.677652	0.0143113	Inhibitor of growth family member 4; tumor suppressor chromatin regulator modulating p53 and NF-κB responses
Gpbar1	-6.16067	0.015225	G-protein bile acid receptor 1 (TGR5); membrane bile-acid sensor modulating cAMP, metabolism and inflammation
Wwc2	-0.717031	0.0193803	WW and C2-domain containing 2; Hippo pathway scaffold regulating cell polarity, growth and mechanosignaling
Snhg10	-1.42463	0.0196653	Small nucleolar RNA host gene 10; long non-coding RNA serving as host for multiple snoRNAs
Ppp1r3e	-1.15837	0.0209814	Protein phosphatase 1 regulatory subunit 3E; glycogen-targeting PP1 subunit regulating glucose storage
Hgh1	-0.710408	0.0209814	HGH1 homolog; ribosome assembly factor required for 60S maturation
AA543401	-4.29881	0.0244189	AA543401; predicted gene/non-coding RNA
0610040B10Rik	-0.975068	0.0275339	RIKEN cDNA 0610040B10 gene; uncharacterized locus
Bcl9	-0.673347	0.0282648	B-cell CLL/lymphoma 9; Wnt/β-catenin transcriptional co-activator essential for stem-cell renewal
Trp63	-1.82787	0.0303199	Tumor protein p63; p53-family transcription factor critical for epithelial development and stem-cell maintenance
Sox12	-0.519577	0.0314968	SRY-box transcription factor 12; transcription factor involved in neural and embryonic development
Ndufb4	-0.851527	0.0347119	NADH dehydrogenase (ubiquinone) subunit B4; mitochondrial complex I subunit required for respiration
Tmod4	-2.44235	0.0349305	Tropomodulin 4; actin-capping protein regulating thin-filament length in muscle
Acot3	-0.94598	0.0355989	Acyl-CoA thioesterase 3; peroxisomal enzyme hydrolyzing fatty acyl-CoAs, regulating lipid metabolism
Gdpgp1	-1.17952	0.0365265	GDP-L-fucose pyrophosphorylase 1-like; nucleotide-sugar metabolism enzyme (putative)
Pus7l	-1.15064	0.0367673	Pseudouridine synthase 7-like; RNA-modifying enzyme introducing pseudouridine into RNA
Lrrc3	-1.43153	0.038103	Leucine-rich repeat–containing protein 3; extracellular matrix/adhesion protein with signaling roles (poorly defined)
Atp5g2	-0.860703	0.038103	ATP synthase membrane subunit c locus 2; mitochondrial proton channel essential for ATP synthesis
Vmac	-0.885452	0.0390675	VMAC protein (Vps50-MAGUK-associated complex protein); endosome-associated complex protein regulating vesicle trafficking
Ccer1	-4.27328	0.043639	Coiled-coil ER protein 1; endoplasmic-reticulum protein involved in secretory pathway function (limited characterization)
Glia
Gene symbol	logFC	FDR	Gene description
Upregulated
Btg2	1.28738	4.97991e-13	Immediate-early transcriptional co-regulator that restrains proliferation, promotes differentiation, and contributes to activity-dependent plasticity.
Nr4a2	2.3994	4.97991e-13	Activity-induced nuclear receptor regulating dopaminergic development, neuronal survival, and stress adaptation.
Fosl2	1.39359	4.97991e-13	AP-1 family transcriptional regulator coordinating cell growth, differentiation, and synaptic plasticity.
Pard6a	1.25618	4.97991e-13	Polarity scaffold protein organizing tight-junction assembly and small-GTPase signaling.
Impdh2	1.30101	4.97991e-13	Rate-limiting enzyme for guanine nucleotide synthesis controlling proliferation and neuronal activity.
Nr4a1	1.95922	4.97991e-13	Activity-dependent transcription factor involved in apoptosis, metabolism, and synaptic remodeling.
Sik1	1.4031	4.97991e-13	AMPK-related serine/threonine kinase induced by stress and hormones to regulate CREB-dependent transcription.
Npas4	3.38654	4.97991e-13	Neuronal PAS-domain transcription factor required for inhibitory-synapse development and memory formation.
Cwc25	0.984783	5.75456e-12	Pre-mRNA-splicing factor essential for spliceosome activation.
Fbxo33	0.831624	2.478e-10	F-box protein of the SCF ubiquitin-ligase complex targeting proteins for proteasomal degradation.
Egr4	2.35667	1.3576e-09	Immediate-early zinc-finger transcription factor responding to neuronal stimulation.
C2cd4b	3.12699	1.3576e-09	Calcium-dependent signaling protein of unknown specific role, potentially mediating vesicular trafficking.
Nr4a3	2.22946	6.12975e-08	Nuclear receptor that modulates metabolic and inflammatory gene expression following activation.
Gm24119	1.97395	1.29083e-07	Predicted gene with limited functional annotation.
Srf	0.887286	1.89134e-07	Serum-response transcription factor controlling actin dynamics and immediate-early gene expression.
Coq10b	0.881385	3.04827e-07	Mitochondrial membrane coenzyme Q–binding protein required for oxidative phosphorylation.
Gadd45g	1.55142	3.72412e-07	Stress-responsive gene that modulates MAPK signaling and DNA repair in neurons.
Tpt1	0.866402	1.66875e-06	Translationally controlled chaperone-like protein implicated in cell-cycle progression and apoptosis regulation.
Junb	1.46022	4.66384e-06	Immediate-early AP-1 component regulating proliferation, stress response, and differentiation.
Siva1	0.802504	8.75638e-06	Pro-apoptotic signaling adaptor activated by stress and DNA damage.
Gpr151	4.02778	8.75638e-06	Brain-enriched G-protein–coupled receptor involved in sensory and reward pathways.
Fosb	2.74304	1.72328e-05	Immediate-early AP-1 transcription factor modulating neuroplasticity and behavioral responses.
Fos	1.79092	1.99561e-05	Proto-oncogenic AP-1 component mediating gene expression after synaptic activity and stress.
Amd1	0.534095	2.03756e-05	Enzyme catalyzing decarboxylation of S-adenosylmethionine to form polyamine precursors for growth.
Eprs	0.443798	2.09072e-05	Bifunctional glutamyl-prolyl-tRNA synthetase coupling amino acid attachment to tRNA and translational control.
Zyx	0.912629	2.37392e-05	Focal-adhesion scaffold linking integrins to the actin cytoskeleton, controlling cell motility and signaling.
Ptgs2	1.60708	6.9251e-05	Inducible prostaglandin-endoperoxide synthase generating prostaglandins in inflammation and neural activity.
Pvr	0.662237	9.03048e-05	Adhesion receptor (Nectin-like 5) participating in immune and cell–cell interactions.
Cdk11b	0.4683	0.000134159	Cyclin-dependent kinase controlling cell division and RNA-processing events.
Arl4c	0.659519	0.000175642	Small GTP-binding protein modulating actin cytoskeleton and protrusion dynamics.
Nip7	0.520418	0.000408283	Nucleolar protein involved in ribosome biogenesis and rRNA processing.
Apold1	1.19913	0.000572439	Apelin-induced endothelial regulator influencing angiogenesis and vascular tone.
Vps37b	0.612789	0.000590583	Endosomal-sorting complex subunit participating in multivesicular-body formation and receptor trafficking.
Surf6	0.495827	0.000661043	Nucleolar RNA-processing factor contributing to ribosome assembly.
Utp14b	0.773508	0.000762463	Pre-rRNA-processing ATP-dependent helicase required for small-subunit formation.
Usp2	0.5146	0.000772971	Ubiquitin-specific protease catalyzing de-ubiquitination of target proteins and metabolic enzymes.
Arid5a	0.729018	0.00088311	RNA-binding regulator stabilizing inflammatory transcripts and cytokine mRNAs.
B3gnt8	0.75081	0.000977552	Glycosyltransferase that synthesizes poly-N-acetyllactosamine structures in glycoproteins and glycolipids.
Tiparp	0.700452	0.00107869	Mono-ADP-ribosyltransferase that modifies proteins downstream of aryl-hydrocarbon-receptor activation.
Ggct	0.561178	0.00112013	Gamma-glutamyl cyclotransferase involved in glutathione metabolism and oxidative-stress defense.
Bambi	0.987521	0.00116337	Secreted TGF-β antagonist modulating bone morphogenetic protein signaling and neurogenesis.
Wdr74	0.474307	0.00116337	WD-repeat scaffold involved in ribosome biogenesis and RNA processing.
Impdh2-ps	0.547557	0.00125848	Processed pseudogene of inosine-monophosphate dehydrogenase 2 without coding potential.
Plk2	1.02985	0.00125848	Serine/threonine kinase that regulates centrosome duplication and synaptic homeostasis.
Unc45a	0.484501	0.00128266	Co-chaperone required for myosin folding and cytoskeletal organization.
Ppp1r3c	1.06362	0.00138148	Regulatory subunit of protein phosphatase 1 controlling glycogen metabolism.
Gem	1.51808	0.00155679	Calcium-binding GTPase-like protein that modulates cytoskeleton and cell adhesion.
Gm17971	1.02787	0.00189773	Predicted locus with limited annotation.
Gmppb	0.788255	0.00197751	GDP-mannose pyrophosphorylase B; glycosylation enzyme important for protein and lipid modification.
Tbl2	0.323542	0.00232867	Endoplasmic-reticulum stress–responsive protein involved in secretory pathway homeostasis.
Rps11-ps1	0.691565	0.00395663	Processed ribosomal-protein pseudogene with no protein-coding function.
Acd	0.732037	0.00417533	Telomerase-stabilizing shelterin-complex component maintaining telomere integrity.
Nop9	0.528892	0.00425271	Nucleolar RNA-binding factor required for pre-rRNA maturation.
Hinfp	0.472337	0.00447447	Histone-gene transcription factor activating replication-dependent histone promoters.
Ddx20	0.440297	0.00546565	DEAD-box RNA helicase functioning in spliceosome assembly and gene silencing.
Leo1	0.646122	0.00548062	Transcriptional-elongation factor that binds polymerase II and controls chromatin organization.
4931440P22Rik	0.759973	0.00566327	Predicted uncharacterized RIKEN locus.
Cystm1	0.361893	0.00578153	Cysteine-rich transmembrane protein of unknown function, possibly stress responsive.
Egr2	1.22685	0.00656711	Immediate-early transcription factor in myelination and nerve injury response.
Tgif1	0.624376	0.00656711	Homeodomain protein regulating development and retinoic-acid signaling.
Tra2a	0.566578	0.00750017	RNA-splicing factor influencing neuron-specific alternative splicing.
Rpl22l1	1.0183	0.00848023	Ribosomal-large-subunit protein supporting translation and stress-response synthesis.
Chaserr	0.533806	0.00895722	Long non-coding RNA modulating chromatin accessibility through CHD2 regulation.
Gm13689	0.702998	0.00934887	Predicted non-coding transcript with uncertain function.
Mlip	1.36213	0.00945889	Nuclear-envelope–associated protein linking lamin A/C to signaling pathways.
Pcdh8	1.15558	0.00960292	Protocadherin family adhesion molecule mediating cell-type-specific connectivity.
Ccn1	0.742395	0.0097976	Matricellular signaling protein stimulating angiogenesis and repair.
Taf11	0.270875	0.0097976	Transcription-factor subunit of TFIID required for RNA-polymerase II initiation.
Gbp11	0.621011	0.00988209	Guanylate-binding protein induced by interferons with antiviral and immune roles.
Rpl37	0.862982	0.00988209	Cytosolic ribosomal-protein component of the large subunit.
Rassf1	0.558541	0.0101604	Tumor-suppressor protein modulating Ras and Hippo pathways.
Klf2	0.912193	0.0104232	Krüppel-like zinc-finger transcription factor promoting endothelial and immune-gene expression.
Adprm	0.378047	0.0105258	ADP-ribose pyrophosphatase maintaining NAD metabolism and energy balance.
Nobox	4.49561	0.0106783	Oocyte-specific homeobox transcription factor regulating germ-cell development.
Mxd1	0.473264	0.0106783	Transcriptional repressor antagonizing Myc and modulating differentiation.
Dhx8	0.360389	0.0106783	RNA-helicase involved in pre-mRNA splicing and mRNA export.
Ccdc184	0.740094	0.0106783	Coiled-coil domain protein with neuronal-development function.
Olfr273	4.79354	0.0118131	Olfactory receptor detecting specific odorant molecules (GPCR).
Snora31	1.07615	0.0124227	Small nucleolar RNA guiding methylation of rRNA.
Tpm4	0.519886	0.0132415	Tropomyosin actin-binding protein stabilizing cytoskeletal filaments and influencing contractility.
Egr1	1.19497	0.0135712	Immediate-early zinc-finger transcription factor governing neuronal activation, growth, and synaptic plasticity.
Polr1c	0.511164	0.0144426	RNA-polymerase I subunit required for rRNA transcription and ribosome biogenesis.
Gm20587	4.93881	0.0156971	Predicted non-coding or weakly expressed transcript with limited annotation.
Ogfod2	0.616116	0.0161341	2-oxoglutarate/Fe²⁺-dependent oxygenase catalyzing hydroxylation of specific tRNAs.
Ppp1r15a	1.03773	0.0163562	Stress-inducible regulatory subunit of protein phosphatase 1 controlling translational recovery and plasticity.
Cenpa	0.740016	0.0167791	Centromeric histone H3 variant marking active centromeres to ensure faithful chromosome segregation.
Mapkapk5	0.617571	0.0183019	MAP-kinase-activated protein kinase 5 mediating p38-MAPK-dependent stress and cytoskeletal responses.
Gm9926	3.98439	0.0201621	Predicted non-coding transcript with minimal functional information.
Bdnf	0.994115	0.0201984	Neurotrophin promoting neuronal survival, differentiation, and long-term potentiation.
Slc29a2	0.562864	0.0204248	Equilibrative nucleoside transporter regulating adenosine and purine uptake across membranes.
Rgs2	0.58093	0.022961	Regulator of G-protein signaling attenuating GPCR signaling in neurons and the cardiovascular system.
Ptma	0.515884	0.02308	Chromatin-associated phosphoprotein that binds histones and regulates gene expression and chromatin compaction.
Nubp2	0.537222	0.0262072	Iron–sulfur-cluster assembly factor required for mitochondrial enzyme maturation and oxidative phosphorylation.
Lypla2	0.44596	0.0266819	Lysophospholipase hydrolyzing membrane lysophosphatidylcholine, maintaining lipid homeostasis.
Hr	0.562335	0.0267769	Hairless nuclear corepressor controlling retinoic-acid and thyroid-hormone receptor signaling in skin and brain.
Spty2d1	0.339012	0.0267939	Chromatin-associated transcriptional regulator controlling stress-induced gene expression and nuclear organization.
Taf10	0.508468	0.027884	Transcription-factor subunit of TFIID required for basal RNA-polymerase II initiation.
Fam53c	0.469297	0.0280037	Scaffold protein modulating Wnt and Hippo signaling and regulating cytoskeletal organization.
Tfpt	0.51784	0.0290031	Cell-cycle-regulated transcriptional co-activator involved in apoptosis and differentiation.
Rhot2	0.639027	0.0310485	Mitochondrial GTPase regulating peroxisome and mitochondrial dynamics.
Atg12	0.350471	0.0310485	Ubiquitin-like conjugation enzyme essential for autophagosome formation during autophagy.
Actr5	0.347607	0.0325052	Actin-related protein forming nuclear complexes for chromatin remodeling.
Sertad1	0.682122	0.0325052	Transcriptional co-activator that promotes cell-cycle progression and p53 regulation.
Rpl7a	0.629927	0.0330178	Cytosolic ribosomal protein of the large subunit required for translation elongation.
Atp5md	0.680484	0.0330178	ATP-synthase membrane-domain subunit coupling proton transport to ATP production.
Proser1	0.40125	0.0337421	Proline/serine-rich protein contributing to cellular adhesion and migration; function incompletely characterized.
Gm18262	4.27256	0.035394	Predicted gene locus with minimal annotation.
Tbl3	0.429772	0.035533	Ribosomal-protein pseudogene representing processed non-coding copy.
Rps17	0.689989	0.0356218	Cytosolic ribosomal protein of the small subunit essential for protein synthesis.
Irgq	0.457722	0.0394332	Interferon-regulated GTPase mediating antimicrobial responses.
Rps2	0.535953	0.0394332	Cytosolic ribosomal protein of the small subunit contributing to translational fidelity.
Myoz1	4.22323	0.0406292	Sarcomeric Z-line protein binding α-actinin and linking actin filaments in muscle and cardiac tissues.
Ube2j2	0.41275	0.0435657	Ubiquitin-conjugating enzyme E2 J2 functioning in ER-associated degradation and protein quality control.
Bag3	0.557013	0.0435657	BAG-family co-chaperone interacting with Hsp70 to regulate apoptosis and proteostasis.
Rem2	1.00242	0.0453672	Calcium/calmodulin-regulated GTPase required for dendritic-growth signaling and neuronal differentiation.
Dclk1	0.48673	0.045992	Serine/threonine kinase involved in microtubule dynamics, axon growth, and adult neurogenesis.
Sh3d21	0.983382	0.045992	SH3-domain-containing adaptor protein mediating cytoskeletal and receptor-signaling interactions.
Ppif	0.628712	0.0470059	Mitochondrial peptidyl-prolyl cis–trans isomerase (cyclophilin D) regulating mitochondrial permeability transition.
Gapdh	0.51297	0.0487115	Glyceraldehyde-3-phosphate dehydrogenase; glycolytic enzyme with additional nuclear and stress-response roles.
Cnnm4	0.37219	0.0492592	Magnesium-transporter protein catalyzing Mg²⁺ efflux across membranes.
Snrnp40	0.307638	0.0492592	Small nuclear ribonucleoprotein component of the U5 snRNP complex required for pre-mRNA splicing.
3930402G23Rik	2.68067	0.0492592	Predicted uncharacterized RIKEN locus corresponding to non-coding RNA.
Ndel1	0.356223	0.0492592	Cytoplasmic dynein-associated adaptor coordinating neuronal migration and nuclear positioning.
Ap2m1	0.352731	0.0492592	Adaptor subunit μ of clathrin-associated adaptor complex 2, mediating endocytosis and vesicular trafficking.
Downregulated
Opn4	-1.75997	3.25595e-10	Photopigment GPCR of photosensitive retinal ganglion cells; mediates light responses and modulates neuronal excitability.
Kcnrg	-1.34741	7.38714e-07	Potassium-channel regulator γ-subunit; cytosolic modulator that tunes voltage-gated K⁺ channel currents and neuronal excitability.
Polr3e	-1.2753	5.35287e-06	RNA polymerase III subunit; required for transcription of tRNAs and other small RNAs, supporting high translational capacity.
Slc16a4	-0.918959	0.000456962	Monocarboxylate transporter family member; facilitates proton-linked transport of lactate/pyruvate across membranes in metabolically active cells.
Hs3st5	-0.692919	0.00054505	Heparan-sulfate 3-O-sulfotransferase; generates signaling-competent HS motifs that shape growth factor and axon-guidance cues.
Tnf	-2.23044	0.000613007	Pro-inflammatory cytokine; master regulator of innate/adaptive immunity, synaptic plasticity under inflammation, and cell-death pathways.
1700055D18Rik	-1.00317	0.000771849	Predicted RIKEN transcript; uncharacterized/non-coding locus.
Zfp719	-0.508844	0.000868769	KRAB zinc-finger transcriptional repressor; likely modulates chromatin and lineage-specific gene programs.
Gm33727	-0.905536	0.000887405	Predicted gene; limited functional annotation.
Pcdhb22	-2.1926	0.00112013	Protocadherin-β family adhesion molecule; contributes to neuronal self-avoidance and circuit-specific connectivity.
Gm4419	-1.07414	0.00138148	Predicted gene; limited functional annotation.
Fam83d	-1.0586	0.00178831	PLAT domain–containing mitotic regulator; promotes spindle formation and cell-cycle progression.
Lsr	-1.1496	0.00234578	Lipolysis-stimulated lipoprotein receptor; junctional protein involved in tricellular tight-junction sealing and endocytosis of lipoproteins.
Zbtb5	-0.309261	0.00256639	BTB/POZ zinc-finger transcription factor; acts as a transcriptional repressor in development and differentiation.
Gm21885	-1.0779	0.00262036	Predicted gene; limited annotation.
Radx	-1.84842	0.00312981	ssDNA-binding factor that stabilizes stalled replication forks and restrains fork reversal to preserve genome integrity.
Xpo7	-0.26407	0.00319166	Exportin-7; karyopherin that mediates nuclear export of diverse cargoes including chromatin regulators.
Zfp72	-0.724081	0.00378836	KRAB zinc-finger protein; likely transcriptional repressor of retroelements and lineage genes.
H2bc23	-1.33531	0.00447447	Histone H2B clustered gene; core nucleosome component shaping chromatin structure.
Traf5	-0.589989	0.00451386	TNF-receptor–associated factor adaptor; E3-ligase/scaffold transducing signals from TNFR/IL-1R to NF-κB and MAPK pathways.
Nlrp3	-0.826832	0.00451386	NLR family inflammasome sensor; upon activation assembles the NLRP3 inflammasome to drive caspase-1 activation and IL-1β/IL-18 maturation.
Rhobtb3	-0.403835	0.00451386	Rho-related BTB-domain protein 3; atypical Rho GTPase controlling endosome-to-Golgi trafficking.
Zfp53	-0.458626	0.00451386	KRAB zinc-finger transcriptional repressor; probable regulator of transposons and developmentally regulated loci.
A330015K06Rik	-0.823931	0.00512764	Predicted RIKEN transcript; uncharacterized locus.
Gpr84	-1.19425	0.00552123	Medium-chain fatty-acid GPCR; pro-inflammatory receptor expressed in myeloid/brain cells that modulates chemotaxis and energy signaling.
Lin28b	-2.25975	0.00726779	RNA-binding developmental regulator; blocks let-7 maturation and promotes growth/plasticity programs.
Rrm2b	-0.426109	0.00726779	p53-inducible ribonucleotide-reductase small subunit; maintains dNTP pools for DNA repair and mitochondrial DNA replication under stress.
Tshb	-0.819807	0.00750017	Thyroid-stimulating hormone β subunit; pituitary hormone controlling thyroid hormone production.
Tmem81	-0.753224	0.00945889	Small transmembrane protein; poorly characterized, may localize to cilia or ER.
Trp73	-0.343648	0.0105258	p53-family transcription factor; governs apoptosis and neurodevelopment via TA and ΔN isoforms.
Parp12	-0.322118	0.0106783	Interferon-stimulated mono-ADP-ribosyltransferase; antiviral effector that represses translation and restricts RNA viruses.
1700067K01Rik	-0.677895	0.0115676	Predicted RIKEN transcript; uncharacterized.
Pid1	-0.290443	0.0121061	PTB-interacting/insulin-responsive endocytic protein; modulates receptor trafficking and lipid uptake; implicated in insulin signaling.
1700012D14Rik	-0.521409	0.0127469	Predicted RIKEN transcript; uncharacterized.
Rab39b	-0.504823	0.0144106	Rab family small GTPase; neuronally enriched regulator of synaptic vesicle/endosomal trafficking; variants linked to Parkinsonism.
Gm31218	-4.2553	0.0144426	Predicted gene; limited annotation.
H2aw	-0.583235	0.0161341	Histone H2A clustered variant; nucleosomal core component.
Tll2	-0.724404	0.0161341	Tolloid-like metalloprotease; extracellular procollagen/BMP-pathway protease involved in matrix remodeling.
Rfesd	-0.682136	0.0194453	Rieske [2Fe-2S] domain–containing oxidoreductase; mitochondrial/redox enzyme with roles in lipid metabolism.
Opa1	-0.315355	0.0194453	Mitochondrial dynamin-like GTPase; mediates inner-membrane fusion and cristae organization; crucial for bioenergetics and neuroprotection.
Btbd16	-0.744316	0.0199855	BTB/POZ domain protein; putative transcriptional regulator, poorly characterized.
Pgbd1	-1.17722	0.0201984	PiggyBac transposable-element–derived factor; chromatin-associated DNA-binding protein implicated in neuronal gene regulation.
Rs1	-1.44993	0.0204248	Retinoschisin; secreted retinal cell-adhesion protein maintaining synaptic/laminar architecture.
Hsf5	-0.62156	0.0238709	Heat-shock transcription factor 5; testis-biased HSF involved in spermatogenesis and proteostasis.
Lrit2	-4.82878	0.0255341	Leucine-rich repeat, Ig-like, transmembrane protein; retina/ON-bipolar-cell synaptic organizer.
Maf	-0.491916	0.0280037	Large Maf bZIP transcription factor; regulates differentiation, oxidative stress responses, and lens/pancreatic genes.
Zfp54	-0.976378	0.0280037	KRAB zinc-finger transcriptional repressor; likely controls retroelement silencing.
Scara5	-2.21149	0.0310485	Scavenger receptor class A member; ferritin/heme-associated endocytic receptor in endothelium and kidney; roles in iron handling.
Ccdc73	-0.599562	0.0325052	Coiled-coil domain–containing protein; poorly characterized.
Zfp617	-0.475897	0.0325052	KRAB zinc-finger protein; probable transcriptional repressor.
Tmem196	-0.530241	0.0325052	Small transmembrane protein enriched in nervous system; implicated in myelination/stress responses.
H2bc24	-1.16848	0.0325052	Histone H2B clustered gene; nucleosome core subunit.
Rad51d	-0.419878	0.0330178	RAD51 paralog in homologous recombination; stabilizes RAD51 filaments for DNA repair and genome stability.
H2bc6	-0.547816	0.0330178	Histone H2B clustered gene; nucleosome component.
Fam120c	-0.464526	0.0337421	RNA-granule/scaffold protein associated with mRNA transport and PI3K signaling.
Olfr167	-4.34743	0.035394	Olfactory receptor (GPCR) detecting volatile odorants.
A230107N01Rik	-0.823774	0.0358787	Predicted RIKEN transcript; uncharacterized.
Flicr	-1.05368	0.0369354	FOXP3 long intergenic non-coding RNA regulator; tunes Treg FOXP3 expression and immune tolerance.
Bbs10	-0.647114	0.0385066	Bardet–Biedl syndrome ciliary chaperonin; essential for BBSome assembly and ciliogenesis.
Fign	-0.396564	0.0414438	AAA+ ATPase microtubule-severing enzyme; remodels microtubules during neurite outgrowth.
Xk	-0.55762	0.0425421	Membrane protein associated with Kell blood group; putative transporter; mutations cause McLeod neuroacanthocytosis.
Ppp3cb	-0.346377	0.0427142	Calcineurin catalytic subunit β; Ca²⁺/calmodulin-activated phosphatase governing synaptic plasticity and NFAT signaling.
Glod4	-0.338881	0.045992	Glyoxalase-domain protein (HAGH-like); detoxifies reactive aldehydes from glycolysis/oxidative stress.
Ccdc149	-0.444436	0.0470059	Coiled-coil domain–containing protein; poorly characterized, predicted centrosomal/ciliary roles.
Top3a	-0.386393	0.0470059	DNA topoisomerase IIIα; resolves recombination/replication intermediates to preserve genome stability.
Tlr1	-0.580438	0.0476747	Pattern-recognition receptor forming heterodimers (with TLR2) to sense bacterial lipoproteins and activate NF-κB.
Nek7	-0.359542	0.0492592	NEK family serine/threonine kinase; promotes mitotic progression and directly licenses NLRP3 inflammasome activation.
Ulbp1	-1.8283	0.0492592	NKG2D-ligand (ULBP/RAET1 family); stress-induced surface glycoprotein that activates cytotoxic lymphocytes.
