# Supplementary material for: A stage-resolved neuron-glia transcriptional atlas reveals a glial inflammatory pivot in epilepsy
Source: Research Square preprint supplement (doi:10.21203/rs.3.rs-8807447/v1), 2026-02-20
Supplement: Supplementary file 3 [file b9e24d1e5bd610390ba5b799.xlsx]

## Sheet: Sheet1
Differentially expressed genes in neurons and glia at 3mpi
Neurons
Gene symbol	logFC	FDR	Gene description
Upregulated
Sp1	0.877046	0.00013025	Specificity protein 1; transcription factor that binds GC-rich promoter elements regulating growth, metabolism, and differentiation.
Parp3	1.9072	0.000298561	Poly(ADP-ribose) polymerase 3; nuclear enzyme catalyzing poly-ADP-ribosylation during DNA repair and apoptosis.
Mrc2	1.18648	0.00197831	Mannose receptor C-type 2; endocytic receptor mediating collagen uptake and antigen processing in macrophages.
Ptprh	1.97787	0.00286956	Protein tyrosine phosphatase receptor type H; receptor phosphatase involved in cell adhesion and signaling.
D830039M14Rik	1.66616	0.00286956	Predicted gene D830039M14Rik; uncharacterized transcript expressed in neural tissue.
Gpr83	1.11676	0.00411993	G-protein-coupled receptor 83; neuropeptide and energy-balance receptor expressed in hypothalamus.
Gpnmb	1.46695	0.00550572	Glycoprotein NMB; transmembrane glycoprotein regulating inflammation, osteogenesis, and tumor progression.
Olfr78	6.06248	0.00550572	Olfactory receptor 78; G-protein-coupled receptor detecting short-chain fatty acids in olfactory and vascular tissues.
Gm14496	6.30619	0.00776356	Predicted gene Gm14496; putative noncoding RNA with limited annotation.
Gkn2	5.87672	0.00776356	Gastrokine 2; secreted epithelial protein contributing to mucosal defense and gastric repair.
Ssxb2	5.85956	0.00904717	Synovial sarcoma X breakpoint 2 binding protein 2; testis-specific antigen with unknown molecular function.
Lacc1	0.710489	0.00918771	Laccase domain-containing protein 1; oxidoreductase implicated in immune and metabolic regulation.
Spata19	5.41724	0.0113617	Spermatogenesis-associated protein 19; mitochondrial protein essential for sperm motility and fertility.
Itgav	0.648929	0.0122268	Integrin alpha V; adhesion receptor subunit mediating cell–matrix interactions and angiogenesis.
Maml3	0.628537	0.0122268	Mastermind-like transcriptional coactivator 3; Notch pathway co-activator regulating differentiation and proliferation.
9130221F21Rik	5.70422	0.0122268	Predicted gene 9130221F21Rik; noncoding RNA with neuronal expression.
Olfr498	6.05965	0.0122268	Olfactory receptor 498; odorant receptor mediating olfactory signal transduction.
Mfsd4b5	2.86814	0.0122268	Major facilitator superfamily domain-containing protein 4B5; putative membrane transporter with uncharacterized substrate.
Mx1	3.77872	0.0122268	MX dynamin-like GTPase 1; interferon-inducible antiviral protein restricting viral replication.
Dapp1	1.79626	0.0130629	Dual adaptor for phosphotyrosine and 3-phosphoinositides 1; adaptor in B-cell and macrophage receptor signaling.
Gm18988	2.94237	0.0131945	Predicted gene Gm18988; uncharacterized RNA transcript.
Olfr1160	4.7338	0.0135358	Olfactory receptor 1160; G-protein-coupled odorant receptor.
Gm9496	5.69064	0.0144963	Predicted gene Gm9496; noncoding RNA of uncertain function.
Ppfibp1	0.642035	0.0144963	Protein tyrosine phosphatase-interacting protein 1 binding protein 1; presynaptic scaffold controlling neurotransmitter release.
Col6a1	1.21601	0.0144963	Collagen type VI alpha 1 chain; extracellular matrix component maintaining connective-tissue integrity.
Fcgr4	4.89001	0.0146456	Low-affinity immunoglobulin gamma Fc receptor IV; receptor mediating antibody-dependent phagocytosis.
Drd4	2.9226	0.0146456	Dopamine receptor D4; G-protein-coupled receptor modulating cognition and behavior.
S100a3	2.98817	0.0154357	S100 calcium-binding protein A3; epidermal protein contributing to hair and nail structure.
Sphk1	1.40315	0.0154357	Sphingosine kinase 1; enzyme generating sphingosine-1-phosphate to control proliferation and inflammation.
Olfr342	5.54507	0.0163405	Olfactory receptor 342; odorant receptor of the GPCR family.
Gstp3	5.89501	0.0170287	Glutathione S-transferase pi 3; detoxification enzyme catalyzing conjugation of electrophiles with glutathione.
Gm18738	3.75187	0.0186841	Predicted gene Gm18738; uncharacterized transcript.
Tcaf2	3.46334	0.0194302	TRPM8 channel–associated factor 2; modulator of transient receptor potential ion channels.
Stk32c	1.14588	0.0194302	Serine/threonine kinase 32C; protein kinase of unknown substrate specificity.
Sulf1	1.33246	0.0204232	Sulfatase 1; extracellular enzyme modifying heparan sulfate chains and signaling gradients.
Kif18a	1.36658	0.0204232	Kinesin-like protein KIF18A; microtubule-based motor controlling mitotic chromosome alignment.
Ghsr	1.22176	0.0204232	Growth hormone secretagogue receptor 1A; ghrelin receptor regulating appetite and metabolism.
Gm12381	5.00136	0.0204232	Predicted gene Gm12381; long noncoding RNA.
Evx1	6.05329	0.0204232	Even-skipped homeobox 1; transcription factor involved in embryonic patterning.
Lag3	2.96883	0.0204232	Lymphocyte-activation gene 3 protein; inhibitory receptor modulating T-cell activation.
Olfr693	5.52477	0.0204232	Olfactory receptor 693; GPCR mediating odor detection.
Pmfbp1	2.11656	0.0204232	Polyamine-modulated factor-binding protein 1; structural protein required for sperm tail formation.
Rbms2	1.1566	0.0204232	RNA-binding motif single-stranded-interacting protein 2; RNA-binding regulator of mRNA stability.
Gm12661	5.71267	0.0204232	Predicted gene Gm12661; uncharacterized transcript.
Drd1	1.40418	0.0225822	Dopamine receptor D1; receptor stimulating adenylyl cyclase in dopaminergic signaling.
Th	2.18191	0.0236498	Tyrosine hydroxylase; rate-limiting enzyme in catecholamine biosynthesis.
Acan	1.03078	0.024727	Aggrecan core protein; cartilage proteoglycan providing compressive strength.
Gm34567	0.76915	0.0269178	Predicted gene Gm34567; uncharacterized noncoding transcript.
Myt1	0.598378	0.0276348	Myelin transcription factor 1; zinc-finger transcription factor promoting neural differentiation.
Gm826	5.37386	0.0277538	Predicted gene Gm826; uncharacterized transcript.
Rgs6	1.01184	0.0277538	Regulator of G-protein signaling 6; GTPase-activating protein terminating dopaminergic GPCR signaling.
Tgfbr2	1.12744	0.0301672	Transforming growth factor beta receptor II; serine/threonine kinase receptor mediating TGF-β signaling.
Gm34105	5.4847	0.0305981	Predicted gene Gm34105; uncharacterized transcript.
Insrr	3.07276	0.031476	Insulin receptor-related receptor; receptor tyrosine kinase with pH-sensing properties.
Nlrp4a	2.92105	0.0318291	NLR family pyrin domain-containing protein 4A; cytosolic pattern-recognition receptor in innate immunity.
Cfh	1.31718	0.0328295	Complement factor H; regulator inhibiting alternative complement activation on host cells.
Erp27	2.777	0.0329092	Endoplasmic reticulum protein 27; chaperone facilitating disulfide bond formation.
Zfp936	3.94973	0.0329092	Zinc finger protein 936; putative transcriptional regulator.
Itk	1.75934	0.0329092	IL2-inducible T-cell kinase; tyrosine kinase transmitting TCR signals in lymphocytes.
Cd22	2.77091	0.0351349	CD22 antigen; inhibitory receptor modulating B-cell receptor signaling.
Cxcr6	2.06417	0.0351451	C-X-C chemokine receptor 6; receptor guiding T cells and NK cells to inflamed tissues.
Zfp872	2.80671	0.0358565	Zinc finger protein 872; transcription factor of unknown function.
Rs1	2.20927	0.035985	Retinoschisin 1; retinal cell-adhesion protein maintaining synaptic integrity.
Ammecr1	0.751425	0.0360927	Ammecr1 gene; nuclear factor implicated in transcriptional control and chromatin maintenance.
4930573H18Rik	5.66222	0.0372379	Predicted gene 4930573H18Rik; uncharacterized RNA.
Tbxas1	1.02321	0.0372379	Thromboxane A-synthase 1; enzyme converting prostaglandin H2 to thromboxane A2 in platelet activation.
Gm33104	5.05825	0.0372379	Predicted gene Gm33104; uncharacterized transcript.
Mylk3	1.2361	0.0379978	Myosin light-chain kinase 3; cardiac-specific kinase regulating contraction.
Tcfl5	2.52062	0.0382128	Transcription factor like 5; basic helix–loop–helix factor required for spermatogenesis.
Ccdc113	1.73358	0.0396777	Coiled-coil domain-containing protein 113; structural component with limited annotation.
Adamts18	1.06928	0.0396777	A disintegrin and metalloproteinase with thrombospondin motifs 18; extracellular protease modulating angiogenesis.
Wfdc9	3.757	0.0398619	Whey acidic protein four-disulfide core domain protein 9; antimicrobial peptide family member.
B3gnt9	1.36299	0.0411691	Beta-1,3-N-acetylglucosaminyltransferase 9; glycosyltransferase involved in glycolipid synthesis.
1700029H14Rik	2.36924	0.0423846	Predicted gene 1700029H14Rik; uncharacterized transcript.
1700056E22Rik	4.69498	0.0424166	Predicted gene 1700056E22Rik; noncoding RNA.
Gm21698	1.39174	0.0424166	Predicted gene Gm21698; uncharacterized transcript.
Hgfac	2.58705	0.0424166	Hepatocyte growth factor activator; serine protease converting pro-HGF to active form.
Svopl	1.73448	0.0424166	Synaptic vesicle protein-like protein 1; integral membrane protein of synaptic vesicles.
Vamp5	2.48081	0.0424166	Vesicle-associated membrane protein 5; SNARE protein mediating vesicle fusion.
Trh	3.76741	0.0424166	Thyrotropin-releasing hormone; hypothalamic hormone controlling pituitary thyroid axis.
Psg19	4.95587	0.0424166	Pregnancy-specific beta-1-glycoprotein 19; secreted glycoprotein expressed in placenta.
Gm25648	4.38385	0.0424166	Predicted gene Gm25648; uncharacterized transcript.
Folr1	2.62547	0.0424166	Folate receptor 1; high-affinity receptor mediating folate uptake.
Gm39307	4.94527	0.0424166	Predicted gene Gm39307; uncharacterized transcript.
4930401C15Rik	4.80203	0.0424166	Predicted gene 4930401C15Rik; uncharacterized RNA.
Tlcd2	2.46553	0.0424166	Transmembrane lipid-binding domain-containing protein 2; regulator of phospholipid composition.
Vrtn	3.82868	0.0424166	Vertebrae development associated protein N; transcriptional regulator required for spinal formation.
Phka2	0.459849	0.0424166	Phosphorylase kinase alpha 2 subunit; catalytic subunit of glycogen phosphorylase kinase complex.
Fras1	0.558307	0.0433671	Fraser extracellular matrix complex subunit 1; basement-membrane protein involved in epidermal–dermal adhesion.
Mgst2	2.862	0.0453016	Microsomal glutathione S-transferase 2; enzyme conjugating glutathione to lipid peroxides.
Gal	2.50324	0.0456315	Galanin peptide precursor; neuropeptide modulating nociception, feeding, and mood.
Gm4780	4.75491	0.0464118	Predicted gene Gm4780; noncoding transcript.
Serpina6	3.91277	0.0464118	Serine protease inhibitor A6 (corticosteroid-binding globulin); plasma glycoprotein binding cortisol and regulating its transport.
Trim52	4.63646	0.0464118	Tripartite motif-containing protein 52; E3 ubiquitin ligase implicated in innate immunity.
Gm4840	4.42707	0.0464118	Predicted gene Gm4840; uncharacterized transcript.
8030455M16Rik	5.25805	0.046821	Predicted gene 8030455M16Rik; noncoding RNA.
Hottip	5.269	0.0477275	HOXA transcript at distal tip (HOTTIP); long noncoding RNA activating HOXA genes in development.
Olfr987	5.41527	0.0477492	Olfactory receptor 987; odorant receptor GPCR.
Rec8	0.779277	0.0477492	REC8 meiotic recombination protein; cohesin component essential for meiotic chromosome segregation.
Tulp1	4.05397	0.0495897	Tubby-like protein 1; photoreceptor-specific protein mediating trafficking in outer segments.
Ccr2	2.31997	0.0498502	C-C chemokine receptor 2; receptor binding monocyte chemoattractant proteins and guiding immune-cell migration.
Downregulated
2310011J03Rik	-0.617884	0.0127166	Putative protein-coding gene 2310011J03Rik; predicted transcript of unknown function, possibly noncoding, expressed in neural tissue.
Tlnrd1	-0.511226	0.0273506	Talin rod domain–containing protein 1; cytoskeletal adaptor involved in linking integrins to actin filaments and regulating cell adhesion.
Snrpf	-1.74757	0.0328295	Small nuclear ribonucleoprotein F; core component of the spliceosomal complex required for pre-mRNA splicing.
Glia
Gene symbol	logFC	FDR	Gene description
Upregulated
Sh2d3c	0.733914	6.94844e-12	SH2 domain–containing protein 3C; adaptor protein involved in intracellular signal transduction and cytoskeletal organization.
Ldb3	0.636359	4.53733e-08	LIM domain–binding protein 3; cytoskeletal scaffold that anchors signaling proteins at Z-discs in muscle cells.
Cxcr6	1.25944	1.46526e-07	C-X-C chemokine receptor 6; receptor mediating chemokine-driven recruitment of immune cells to inflammatory sites.
Fgl2	1.37174	6.28355e-07	Fibrinogen-like protein 2; secreted procoagulant involved in immune regulation and tissue repair.
Zscan22	0.470233	6.28355e-07	Zinc finger and SCAN domain–containing protein 22; transcription factor regulating gene expression during development.
4933421O10Rik	0.615976	7.51357e-07	Predicted gene 4933421O10Rik; uncharacterized transcript with limited functional data.
4930594C11Rik	1.15901	4.32879e-06	Predicted gene 4930594C11Rik; uncharacterized noncoding RNA.
Gm14452	6.15625	5.40024e-06	Predicted gene Gm14452; putative transcript with unknown function.
Pirb	0.775188	6.05268e-06	Paired immunoglobulin-like receptor B; inhibitory receptor regulating immune cell activation thresholds.
Lyz2	1.03876	7.19262e-06	Lysozyme C-2; antibacterial enzyme hydrolyzing bacterial cell walls.
C3ar1	0.799228	7.26209e-06	Complement component 3a receptor 1; receptor for complement fragment C3a mediating inflammatory signaling.
Apobec3	0.430535	7.26209e-06	Apolipoprotein B mRNA editing enzyme catalytic subunit 3; cytidine deaminase providing antiviral defense by editing viral genomes.
Pilrb2	2.29821	8.84347e-06	Paired immunoglobulin-like receptor B2; inhibitory receptor modulating myeloid cell activation.
Sdc1	0.811095	1.06351e-05	Syndecan-1; transmembrane proteoglycan regulating cell adhesion and growth factor signaling.
Gm12852	5.20656	2.73875e-05	Predicted gene Gm12852; uncharacterized RNA transcript.
Col20a1	0.740354	3.16698e-05	Collagen type XX alpha 1 chain; extracellular matrix component associated with connective-tissue structure.
C4a	1.44954	3.16698e-05	Complement component 4A; protein of the classical complement pathway mediating immune complex clearance.
Gpr65	1.65989	4.48897e-05	G-protein-coupled receptor 65; proton-sensing receptor involved in immune cell survival and inflammation.
Gm46495	4.55656	4.67159e-05	Predicted gene Gm46495; uncharacterized transcript.
C4b	1.55877	5.09805e-05	Complement component 4B; complement system protein similar to C4A, functioning in immune response.
Trpv4	1.15323	5.11744e-05	Transient receptor potential cat. channel subfam. V memb. 4; osmo/mechanosensit. ion channel regul. vascular + epithelial responses.
Hba-ps4	2.35545	5.11744e-05	Hemoglobin alpha pseudogene 4; nonfunctional transcript related to hemoglobin alpha gene family.
Gbx2	5.00317	7.09623e-05	Gastrulation brain homeobox 2; transcription factor essential for neural patterning during development.
Bcl3	1.53695	8.01093e-05	B-cell lymphoma 3 protein; transcriptional co-regulator modulating NF-κB signaling.
Hpn	1.12525	9.3475e-05	Hepsin; membrane serine protease involved in cell growth and extracellular matrix remodeling.
H6pd	0.741473	0.000169305	Hexose-6-phosphate dehydrogenase; enzyme generating NADPH in the endoplasmic reticulum lumen.
Rpl13-ps5	1.83353	0.000169305	Ribosomal protein L13 pseudogene 5; noncoding pseudogene derived from ribosomal protein L13.
Ccl12	1.61661	0.000191651	C-C motif chemokine ligand 12; chemotactic cytokine that recruits monocytes and lymphocytes to sites of inflammation.
Hmgb1-ps5	0.64978	0.000233399	High mobility group box 1 pseudogene 5; nonfunctional transcript related to chromatin-binding protein HMGB1.
4933424M12Rik	1.95658	0.000252836	Predicted gene 4933424M12Rik; uncharacterized noncoding RNA.
Mir5123	3.55034	0.00025594	MicroRNA 5123; small regulatory RNA molecule modulating gene expression post-transcriptionally.
Epha2	1.13845	0.000377431	Ephrin type-A receptor 2; receptor tyrosine kinase controlling cell adhesion, migration, and axon guidance.
Rn7s1	0.800925	0.000414494	RNA, 7S small cytoplasmic 1; component of the signal recognition particle guiding nascent peptides to the ER.
Rxrg	0.814529	0.000419805	Retinoid X receptor gamma; nuclear receptor regulating transcription in response to retinoic acid.
Helb	0.620706	0.000513048	DNA helicase B; enzyme participating in DNA replication and repair during S-phase.
Cdt1	0.933554	0.000610062	Chromatin licensing and DNA replication factor 1; essential for replication origin licensing and genome stability.
Epsti1	0.977952	0.000644194	Epithelial stromal interaction protein 1; interferon-inducible protein involved in extracellular matrix remodeling and cell adhesion.
Flnc	1.14112	0.000683088	Filamin C; actin-binding cytoskeletal protein maintaining muscle structural integrity.
Rps19	0.56404	0.000765814	Ribosomal protein S19; structural component of the small ribosomal subunit involved in translation initiation.
Dlk1	1.44181	0.000765814	Delta-like 1 homolog; Notch ligand modulating differentiation, adipogenesis, and embryonic growth.
Gm6583	0.770994	0.000831817	Predicted gene Gm6583; uncharacterized transcript.
1700055D18Rik	0.826886	0.000898889	Predicted gene 1700055D18Rik; putative noncoding RNA.
Fam83c	1.73852	0.00109283	Family with sequence similarity 83 member C; probable signaling scaffold protein of unknown precise function.
Gm11405	0.546219	0.00137429	Predicted gene Gm11405; uncharacterized transcript.
Meox1	1.18124	0.00143416	Mesenchyme homeobox 1; transcription factor required for somite and skeletal development.
Meak7	0.71971	0.00148998	MEAK7 protein; scaffold protein linking mTORC1 to lysosomal signaling under stress conditions.
Fam78a	1.31761	0.00162352	Family with sequence similarity 78 member A; uncharacterized transmembrane protein expressed in neural tissue.
Phf7	0.55856	0.00162352	PHD finger protein 7; histone reader that regulates androgen receptor–dependent transcription.
Sh3tc1	0.594048	0.00197816	SH3 domain and tetratricopeptide repeats–containing protein 1; adaptor linking signaling complexes and cytoskeletal elements.
Gm19345	2.49321	0.00197816	Predicted gene Gm19345; noncoding transcript.
Gm13370	0.676262	0.00203521	Predicted gene Gm13370; uncharacterized gene.
Eva1b	0.809301	0.00203521	Eva-1 homolog B; transmembrane protein involved in cell adhesion and apoptotic signaling.
Pik3r6	0.618912	0.00207671	Phosphoinositide-3-kinase regulatory subunit 6; adapter subunit in class IB PI3K complex modulating neutrophil signaling.
Rin3	0.536557	0.00208467	Ras and Rab interactor 3; GTPase effector involved in endocytosis and receptor trafficking.
Itpr3	1.17487	0.00208467	Inositol 1,4,5-trisphosphate receptor type 3; ER calcium release channel regulating intracellular Ca²⁺ signaling.
Ppp1r3b	0.778845	0.00216073	Protein phosphatase 1 regulatory subunit 3B; glycogen-targeting subunit controlling hepatic glycogen metabolism.
Fam71e1	0.614397	0.00255471	Family with sequence similarity 71 member E1; poorly characterized protein expressed in testis.
Klhl36	0.680164	0.00255471	Kelch-like family member 36; cytoskeletal protein involved in ubiquitin-mediated protein degradation.
1810007D17Rik	3.91748	0.00268597	Predicted gene 1810007D17Rik; noncoding RNA of unknown function.
Anxa2	0.783974	0.00280687	Annexin A2; calcium-dependent phospholipid-binding protein involved in membrane organization, exocytosis, and fibrinolysis.
Irx2	2.13472	0.00280687	Iroquois homeobox protein 2; transcription factor regulating pattern formation and neural differentiation.
Rpl39	0.824015	0.00280687	Ribosomal protein L39; structural component of the large ribosomal subunit essential for translation.
Sik1	0.532087	0.00280853	Salt-inducible kinase 1; serine/threonine kinase modulating CREB signaling and metabolic adaptation.
Erfe	2.01849	0.00285068	Erythroferrone; hormone regulating iron homeostasis by suppressing hepcidin expression during erythropoiesis.
Xist	2.34928	0.00285068	X-inactive specific transcript; long noncoding RNA essential for X chromosome inactivation in females.
Ptrh1	1.46031	0.00324925	Peptidyl-tRNA hydrolase 1; enzyme releasing tRNA from prematurely terminated peptides to maintain translation fidelity.
Cad	0.553855	0.00324925	Carbamoyl-phosphate synthetase 2, aspartate transcarbamylase, and dihydroorotase; multifunct. enzyme in pyrimidine biosynthesis.
Gm15727	2.24875	0.00324925	Predicted gene Gm15727; uncharacterized transcript.
Piezo1	0.576981	0.00324925	Piezo type mechanosensitive ion channel component 1; mechanotransduction channel controlling cell responses to mechanical stimuli.
Appbp2os	0.946075	0.00324925	APP binding protein 2, opposite strand transcript; antisense RNA possibly regulating APPBP2 expression.
Hspb9	2.29772	0.00324925	Heat shock protein family B member 9; small heat shock protein expressed mainly in testis.
Bach1	0.388751	0.00324925	BTB domain and CNC homolog 1; transcription factor involved in oxidative stress response and heme metabolism.
Tgif1	0.529161	0.00324925	TGFB-induced factor homeobox 1; transcriptional repressor modulating TGF-β–responsive gene expression.
Gm25016	2.66805	0.00332634	Predicted gene Gm25016; uncharacterized transcript.
Fblim1	0.98857	0.00334072	Filamin-binding LIM protein 1; actin-binding protein regulating cytoskeletal remodeling and focal adhesion.
Zbtb33	0.951452	0.00334072	Zinc finger and BTB domain–containing protein 33; transcriptional repressor that binds methylated CpG DNA.
Cdc42ep3	0.479758	0.00338372	CDC42 effector protein 3; cytoskeletal regulator linking small GTPase CDC42 to actin dynamics.
Dcst2	1.25269	0.00344161	DC-STAMP domain–containing protein 2; transmembrane protein possibly involved in gamete or cell fusion.
Leng1	0.453966	0.00344161	Leukocyte receptor cluster member 1; regulatory protein expressed in immune cells.
Snx20	0.461566	0.00344161	Sorting nexin 20; endosomal protein involved in vesicle trafficking and membrane remodeling.
Degs2	0.878366	0.00344161	Delta 4-desaturase, sphingolipid 2; enzyme catalyzing sphingolipid desaturation in lipid metabolism.
As3mt	0.341197	0.00344161	Arsenite methyltransferase; enzyme detoxifying inorganic arsenic via methylation.
1700120C14Rik	0.621218	0.00361576	Predicted gene 1700120C14Rik; uncharacterized transcript.
Uckl1os	0.8236	0.00364266	Uridine-cytidine kinase like 1, opposite strand; noncoding RNA antisense to UCKL1, possibly regulatory.
Gpr87	2.12601	0.0037669	G protein-coupled receptor 87; receptor involved in cellular stress responses and tumorigenesis.
Pim1	1.20307	0.00384443	Proto-oncogene serine/threonine-protein kinase Pim-1; kinase promoting cell survival and proliferation.
4732414G09Rik	1.25068	0.00405256	Predicted gene 4732414G09Rik; uncharacterized noncoding RNA.
Vamp5	0.603965	0.00408249	Vesicle-associated membrane protein 5; SNARE protein facilitating vesicular transport and exocytosis.
Olfr222	5.50442	0.00438306	Olfactory receptor 222; G protein-coupled receptor mediating odorant signal detection.
Ebi3	1.00469	0.00441915	Epstein-Barr virus–induced gene 3; secreted cytokine subunit forming heterodimers involved in immune modulation.
Tbc1d2	0.53378	0.00450052	TBC1 domain family member 2; GTPase-activating protein involved in endocytic trafficking and membrane dynamics.
Syt9	0.761028	0.00465003	Synaptotagmin 9; calcium sensor regulating neurotransmitter release at synaptic vesicles.
Mpeg1	0.528093	0.00465003	Macrophage-expressed gene 1; pore-forming protein contributing to bactericidal activity of macrophages.
Uhrf1bp1	0.432712	0.00471276	UHRF1 binding protein 1; nuclear protein implicated in DNA methylation maintenance and chromatin organization.
Trmt10a	0.48415	0.00487808	tRNA methyltransferase 10A; enzyme modifying tRNA to ensure proper folding and stability.
Chtf18	0.533285	0.00487808	Chromosome transmission fidelity factor 18 homolog; essential for sister chromatid cohesion during DNA replication.
Epb41l4aos	0.901875	0.00487808	Erythrocyte membrane protein band 4.1 like 4A, opposite strand; antisense transcript likely regulating cytoskeletal organization genes.
Trpm2	0.529781	0.00494861	Transient receptor potential cation channel subfamily M member 2; oxidative stress–activated ion channel controlling calcium influx.
Gm17046	1.41062	0.00495831	Predicted gene Gm17046; uncharacterized transcript.
Cyb5rl	0.940531	0.00510574	Cytochrome b5 reductase–like; enzyme maintaining redox balance by reducing cytochrome b5.
6330415G19Rik	0.930594	0.00522727	Predicted gene 6330415G19Rik; uncharacterized RNA transcript.
B3gnt2	0.826364	0.00542151	Beta-1,3-N-acetylglucosaminyltransferase 2; glycosyltransferase extending poly-N-acetyllactosamine chains on glycoproteins.
Zfp169	0.485227	0.00569902	Zinc finger protein 169; probable transcriptional regulator with DNA-binding capability.
Ube4bos3	0.783433	0.00570225	Ubiquitin-conjugating enzyme E4 B, opposite strand; antisense RNA of E4B involved in protein ubiquitination.
Trmt12	0.370956	0.00579771	tRNA methyltransferase 12; catalyzes tRNA methylation, maintaining translation fidelity.
Gimap3	1.28849	0.00583685	GTPase IMAP family member 3; GTP-binding protein regulating lymphocyte survival and differentiation.
Bicc1	0.479622	0.00583685	BicC family RNA-binding protein 1; post-transcriptional regulator modulating mRNA stability in kidney and development.
H2-DMb2	1.26583	0.00614203	Histocompatibility 2, DM beta 2; MHC class II molecule involved in peptide loading and antigen presentation.
Myadml2	0.679444	0.00628877	Myeloid-associated differentiation marker-like 2; putative secreted protein expressed in myeloid lineage cells.
Man2b2	0.393311	0.00647793	Mannosidase alpha class 2B member 2; lysosomal enzyme catalyzing mannose residue removal from glycoproteins.
Gm7600	1.08537	0.0067178	Predicted gene Gm7600; uncharacterized transcript.
Lag3	0.85228	0.00689824	Lymphocyte activation gene 3 protein; immune checkpoint receptor regulating T cell activation and tolerance.
4833411C07Rik	0.856565	0.00689824	Predicted gene 4833411C07Rik; noncoding RNA of unknown function.
Kcnn4	1.35489	0.0070488	Calcium-activated potassium channel subunit alpha 4; regulates membrane potential and calcium-dependent signaling in immune cells.
Tlr1	0.540601	0.00709097	Toll-like receptor 1; pattern recognition receptor detecting bacterial lipoproteins and activating innate immune responses.
Vmn2r-ps121	5.03923	0.00774319	Vomeronasal 2 receptor pseudogene 121; nonfunctional olfactory receptor pseudogene.
Zbtb32	0.969077	0.00784778	Zinc finger and BTB domain–containing protein 32; transcriptional repressor modulating immune responses.
Tatdn2	0.97629	0.00804868	TatD DNase domain–containing protein 2; nuclease possibly involved in DNA repair and degradation of damaged nucleotides.
Crybg2	1.05601	0.00817164	Crystallin beta-gamma domain–containing protein 2; structural protein expressed in ocular and neural tissues.
Capsl	1.81625	0.00823479	Calcyphosin-like protein; calcium-binding protein regulating ion transport.
Wdr25	0.61623	0.00837821	WD repeat–containing protein 25; scaffold protein implicated in signal transduction and development.
Apobec1	0.555259	0.00840832	Apolipoprotein B mRNA editing enzyme catalytic subunit 1; cytidine deaminase responsible for RNA editing in APO B transcripts.
Marveld2	1.44867	0.00840832	Marvel domain–containing protein 2; tight junction component regulating epithelial barrier integrity.
Cradd	0.613675	0.00888561	CASP2 and RIPK1 domain–containing adaptor with death domain; adaptor protein mediating apoptosis signaling.
Gm4953	4.75797	0.00888758	Predicted gene Gm4953; uncharacterized transcript.
2200002D01Rik	1.275	0.00888758	Predicted gene 2200002D01Rik; noncoding RNA.
Map10	0.534396	0.00888758	Microtubule-associated protein 10; regulator of microtubule stability and mitotic spindle formation.
Gsto1	0.457276	0.00888758	Glutathione S-transferase omega 1; enzyme catalyzing detoxification reactions and oxidative stress protection.
Ptgir	2.36395	0.00900551	Prostaglandin I2 receptor; G protein–coupled receptor mediating vasodilation and platelet inhibition.
Olfr310	4.52825	0.00913591	Olfactory receptor 310; odorant receptor mediating olfactory signal transduction.
9530082P21Rik	0.662088	0.00913591	Predicted gene 9530082P21Rik; uncharacterized RNA transcript.
Poglut3	0.474069	0.00916993	Protein O-glucosyltransferase 3; enzyme adding O-linked glucose residues to epidermal growth factor repeats.
Casp1	0.750242	0.00975946	Caspase-1; cysteine protease mediating inflammatory cytokine activation and pyroptotic cell death.
Batf3	0.608687	0.00984666	Basic leucine zipper transcription factor ATF-like 3; transcription factor controlling dendritic cell development and antiviral responses.
D030028A08Rik	0.417537	0.010406	Predicted gene D030028A08Rik; noncoding RNA.
Gcgr	0.76623	0.0106706	Glucagon receptor; G protein–coupled receptor regulating glucose metabolism and hepatic glucose output.
Slc46a3	0.323687	0.0107173	Solute carrier family 46 member 3; transporter possibly mediating organic solute uptake in intestine.
Podnl1	1.40299	0.0107173	Podocan-like protein 1; extracellular matrix glycoprotein regulating cell adhesion and migration.
Cd300a	0.489906	0.0108483	CD300 antigen-like family member A; immunoreceptor modulating myeloid cell activation.
Olfr1050-ps1	4.87818	0.0109802	Olfactory receptor 1050 pseudogene 1; nonfunctional olfactory receptor transcript.
Anxa3	0.669461	0.0112815	Annexin A3; calcium-dependent phospholipid-binding protein involved in exocytosis and coagulation.
Panx1	0.371112	0.0116446	Pannexin 1; membrane channel mediating ATP release and intercellular communication.
C130050O18Rik	0.984739	0.012187	Predicted gene C130050O18Rik; uncharacterized transcript.
Xylb	0.707554	0.012187	Xylulokinase; enzyme catalyzing phosphorylation of xylulose in carbohydrate metabolism.
AI662270	1.21362	0.0123021	Predicted gene AI662270; uncharacterized transcript.
Gm24878	3.39923	0.0123944	Predicted gene Gm24878; uncharacterized RNA.
Sgsh	0.505547	0.0123944	N-sulfoglucosamine sulfohydrolase; lysosomal enzyme involved in heparan sulfate degradation.
1700014D04Rik	1.57237	0.0123944	Predicted gene 1700014D04Rik; noncoding RNA.
Maff	1.38229	0.0124304	MAF bZIP transcription factor F; transcription factor mediating oxidative stress response and heme metabolism.
Isca1	0.276512	0.0124573	Iron-sulfur cluster assembly enzyme 1; mitochondrial protein required for Fe-S cluster biosynthesis.
Gm16174	2.3622	0.0126712	Predicted gene Gm16174; uncharacterized RNA transcript.
Dctd	0.575305	0.0126712	Deoxycytidylate deaminase; enzyme catalyzing conversion of dCMP to dUMP in nucleotide metabolism.
Itga5	0.780441	0.0131043	Integrin alpha 5; adhesion receptor mediating binding to fibronectin and regulating cell migration.
Etnk2	0.81031	0.0136974	Ethanolamine kinase 2; enzyme catalyzing phosphorylation of ethanolamine in phospholipid biosynthesis.
Ddx18	0.334778	0.0137109	DEAD-box helicase 18; RNA helicase participating in ribosome biogenesis and RNA metabolism.
Plaur	1.15167	0.0140276	Plasminogen activator urokinase receptor; cell surface receptor mediating proteolysis and cell migration.
Cnn2	0.676012	0.0144312	Calponin 2; actin-binding protein regulating smooth muscle contraction and cytoskeletal organization.
Baiap2l2	0.970817	0.0144312	BAI1-associated protein 2-like 2; cytoskeletal scaffold modulating membrane protrusions and auditory hair cell function.
Timeless	0.615684	0.0147216	Timeless circadian regulator; protein linking DNA replication timing with the circadian clock and genome stability.
2010308F09Rik	3.16459	0.0147245	Predicted gene 2010308F09Rik; uncharacterized transcript.
Fcgr2b	0.614047	0.0147285	Fc gamma receptor IIb; inhibitory receptor on B cells modulating immune complex signaling.
Gpr151	2.00224	0.0149625	G protein-coupled receptor 151; orphan receptor implicated in regulation of neuronal signaling and mood behavior.
Serpina3n	0.755145	0.0149821	Serine protease inhibitor A3N; acute-phase protein with serine protease inhibitory activity during inflammation.
C5ar1	0.625832	0.0150363	Complement component 5a receptor 1; G protein-coupled receptor mediating inflammatory responses to complement activation.
Hcar2	0.939141	0.0151132	Hydroxycarboxylic acid receptor 2; receptor for nicotinic acid involved in lipid metabolism and anti-inflammatory signaling.
Pkn3	1.0895	0.0151139	Protein kinase N3; serine/threonine kinase regulating cytoskeletal rearrangements and cell migration.
Lama5	0.708992	0.0153363	Laminin subunit alpha 5; component of the extracellular matrix influencing tissue morphogenesis and basement membrane stability.
Fech	0.309138	0.0153784	Ferrochelatase; mitochondrial enzyme catalyzing the final step in heme biosynthesis.
1700099I09Rik	2.06286	0.0154607	Predicted gene 1700099I09Rik; noncoding RNA.
Batf2	1.25051	0.0154607	Basic leucine zipper transcription factor ATF-like 2; transcriptional activator mediating interferon signaling.
Dhx58	0.66185	0.0160956	DEAD-box helicase 58; cytosolic RNA helicase recognizing viral RNA and initiating antiviral responses.
9130019O22Rik	0.438096	0.0165792	Predicted gene 9130019O22Rik; uncharacterized RNA transcript.
Cbfa2t3	0.508036	0.0166064	Core-binding factor beta subunit 3; transcriptional corepressor implicated in hematopoiesis and tumor suppression.
Slc10a5	1.77509	0.0169258	Solute carrier family 10 member 5; bile acid and organic anion transporter of unknown specificity.
Iffo2	0.740609	0.0173867	Intermediate filament family orphan 2; cytoskeletal protein expressed in epithelial tissues.
Clec4a3	0.820944	0.0173867	C-type lectin domain family 4 member A3; pattern recognition receptor mediating antigen capture and presentation.
Igfbp6	0.861599	0.0173867	Insulin-like growth factor binding protein 6; modulates IGF signaling by high-affinity ligand binding and inhibition of growth.
Hba-a1	0.572085	0.017488	Hemoglobin subunit alpha 1; oxygen transport protein in red blood cells.
Ctu1	0.477919	0.0175911	Cytosolic thiouridylase 1; enzyme modifying wobble uridines in tRNA for decoding accuracy.
Prkag3	1.37662	0.0192688	Protein kinase AMP-activated catalytic subunit gamma 3; regulatory subunit of AMPK involved in muscle energy metabolism.
Gfy	5.43313	0.0195987	Gamma-fibrinogen Y; plasma glycoprotein involved in clot formation.
Ugt1a7c	0.538042	0.0196213	UDP glucuronosyltransferase family 1 member A7C; enzyme conjugating glucuronic acid to xenobiotics for detoxification.
Barhl2	0.771895	0.0198866	BarH-like homeobox 2; transcription factor directing neuronal differentiation and retinal development.
Zkscan8	0.328852	0.0198933	Zinc finger and SCAN domain–containing protein 8; transcription factor involved in gene silencing.
Gm7091	5.17102	0.0201736	Predicted gene Gm7091; uncharacterized transcript.
Nfatc4	1.13584	0.0205938	Nuclear factor of activated T cells cytoplasmic 4; transcription factor controlling T cell activation and development.
Eqtn	1.9387	0.0206206	Equatorin; acrosomal membrane protein participating in sperm–egg interaction.
4930412B13Rik	2.80466	0.0206864	Predicted gene 4930412B13Rik; uncharacterized noncoding RNA.
Exosc5	0.367405	0.0206864	Exosome component 5; 3'-5' exoribonuclease subunit essential for RNA degradation and processing.
Copz2	0.702569	0.0206864	Coatomer subunit zeta 2; cytosolic protein forming part of the COPI complex for retrograde vesicle transport.
Gm12187	4.2525	0.0213632	Predicted gene Gm12187; uncharacterized RNA.
Slc25a39	0.267539	0.0216092	Solute carrier family 25 member 39; mitochondrial transporter contributing to iron-sulfur cluster biogenesis.
8030423J24Rik	1.34116	0.0216092	Predicted gene 8030423J24Rik; noncoding RNA.
Cplane2	0.600589	0.0216573	Ciliogenesis and planar polarity effector 2; centrosomal protein regulating ciliogenesis and planar cell polarity.
Zfp217	0.523027	0.0217702	Zinc finger protein 217; oncogenic transcription factor modulating cell cycle progression and apoptosis.
Gm5655	1.54044	0.0218695	Predicted gene Gm5655; uncharacterized transcript.
Gm25337	2.18355	0.0219483	Predicted gene Gm25337; uncharacterized RNA.
Primpol	0.50952	0.0222733	Primase-polymerase; DNA primase and polymerase involved in replication fork restart and repair of stalled DNA.
Ofd1	0.374097	0.0223706	Oral-facial-digital syndrome 1 protein; centrosomal protein required for ciliogenesis and left–right body axis determination.
Gm23639	2.32031	0.0226057	Predicted gene Gm23639; uncharacterized transcript.
Cltrn	2.06901	0.022707	Collectrin; membrane glycoprotein regulating amino acid transport and kidney development.
Dclre1b	0.430582	0.0229092	DNA cross-link repair 1B; endonuclease participating in interstrand cross-link repair and DNA replication recovery.
Cenpa	0.557038	0.0229092	Centromere protein A; histone H3 variant marking centromeric chromatin essential for kinetochore assembly.
Duxbl2	0.99192	0.0229092	Double homeobox B-like 2; transcription factor potentially regulating early embryonic gene expression.
Hspa1l	1.56192	0.0229092	Heat shock protein family A member 1-like; molecular chaperone assisting in protein folding under stress.
Tmem220	0.725164	0.0234036	Transmembrane protein 220; predicted transmembrane protein with unknown function.
Tbx2	0.846356	0.0234801	T-box transcription factor 2; transcriptional repressor involved in limb, heart, and craniofacial development.
4930525G20Rik	0.868748	0.0238503	Predicted gene 4930525G20Rik; noncoding RNA of unknown function.
Oxld1	0.678968	0.0245503	Oxidoreductase-like 1; probable oxidoreductase involved in cellular redox processes.
Polr2j	0.354613	0.0247545	RNA polymerase II subunit J; component of RNA polymerase II complex essential for mRNA transcription.
Cntrob	0.281714	0.024867	Centrosomal protein of 110 kDa; scaffolding protein organizing microtubule nucleation at centrosomes.
A130077B15Rik	2.57082	0.0250445	Predicted gene A130077B15Rik; uncharacterized RNA transcript.
Tnfrsf13b	0.540987	0.0250445	Tumor necrosis factor receptor superfamily member 13B; receptor on B cells regulating survival and antibody production.
Hoxc10	2.7261	0.0258529	Homeobox C10; transcription factor specifying posterior body and limb patterning.
Spats1	0.649098	0.026887	Spermatogenesis-associated protein 1; testis-specific protein involved in germ cell differentiation.
Xpa	0.308389	0.0272369	Xeroderma pigmentosum group A complementing protein; DNA repair protein recognizing UV-induced damage.
Rab43	0.568429	0.0272369	Ras-related protein Rab-43; small GTPase regulating vesicular trafficking through the Golgi apparatus.
Esyt1	0.440439	0.0275151	Extended synaptotagmin 1; ER–plasma membrane tether mediating lipid transport and calcium signaling.
Acap1	1.44121	0.0277548	ArfGAP with coiled-coil, ankyrin repeat and PH domains 1; GTPase-activating protein controlling endocytosis.
Hif3a	0.795228	0.0278524	Hypoxia-inducible factor 3 alpha; transcription factor modulating oxygen-responsive gene expression.
Stat5a	0.605819	0.0281143	Signal transducer and activator of transcription 5A; transcription factor mediating cytokine and growth factor signaling.
Parp10	0.5887	0.0281143	Poly(ADP-ribose) polymerase family member 10; mono-ADP-ribosyltransferase regulating transcription and DNA repair.
Tex55	5.23388	0.0283737	Testis-expressed protein 55; poorly characterized testis-specific protein.
Etfbkmt	0.658361	0.0285516	Electron transfer flavoprotein subunit beta lysine methyltransferase; enzyme methylating lysine residues of ETFB.
Rnase2a	4.89003	0.0285516	Ribonuclease A family member 2A; secreted ribonuclease with antiviral and immune modulatory activity.
Gm4240	1.69155	0.0285516	Predicted gene Gm4240; uncharacterized transcript.
Trpv3	0.455504	0.0287247	Transient receptor potential cation channel subfamily V member 3; thermosensitive cation channel involved in skin sensation.
Tmem262	1.68683	0.0290802	Transmembrane protein 262; predicted multi-pass membrane protein.
Mfsd2b	0.638198	0.0292363	Major facilitator superfamily domain-containing 2B; transporter possibly involved in lipid uptake at the blood–brain barrier.
Cd27	1.00881	0.0294613	CD27 antigen; co-stimulatory receptor enhancing T and B cell activation.
Osm	1.02758	0.0294613	Oncostatin-M; cytokine modulating inflammation, cell growth, and tissue remodeling.
Rnf213	0.404548	0.0294613	Ring finger protein 213; E3 ubiquitin ligase involved in angiogenesis and vascular remodeling.
Pp2d1	0.95153	0.0298601	Phosphoprotein phosphatase domain-containing 1; putative serine/threonine phosphatase.
Katnip	0.331313	0.0305401	Katanin-interacting protein; regulator of microtubule severing and spindle dynamics.
Slc16a3	0.453095	0.0306789	Solute carrier family 16 member 3; monocarboxylate transporter mediating lactate and pyruvate efflux.
H2bc7	2.3588	0.0306789	Histone H2B cluster 7; structural histone protein forming nucleosome core particles.
Gm23706	1.3116	0.0306789	Predicted gene Gm23706; uncharacterized transcript.
Mtmr9	0.451308	0.0312389	Myotubularin-related protein 9; phosphatidylinositol phosphatase regulating endosomal trafficking.
Mymx	4.96635	0.0312389	Myomixer; micropeptide promoting myoblast fusion during skeletal muscle formation.
Napsa	1.15874	0.0313574	Napsin A aspartic peptidase; lysosomal enzyme involved in protein degradation in lung and kidney.
Eno4	0.775594	0.0313815	Enolase 4; glycolytic enzyme expressed primarily in germ cells.
Hus1b	3.62685	0.0317853	HUS1 checkpoint clamp component B; DNA damage response protein ensuring replication fork integrity.
Rab4b	0.633309	0.0318419	Ras-related protein Rab-4B; small GTPase controlling early endosome recycling.
Acy3	0.829489	0.0318419	Acy3 aminoacylase 3; enzyme hydrolyzing N-acylated amino acids in metabolism.
Rhoj	0.566053	0.0324129	Ras homolog family member J; small GTPase regulating endothelial barrier and angiogenesis.
Csl	1.57748	0.0327586	C-type lectin superfamily member L; potential cell adhesion molecule.
Col9a1	0.76855	0.0328858	Collagen type IX alpha 1 chain; extracellular matrix protein contributing to cartilage structure.
Nes	1.17739	0.0328858	Nestin; intermediate filament protein expressed in neural progenitor cells.
1190005I06Rik	0.798346	0.0328858	Predicted gene 1190005I06Rik; uncharacterized RNA.
Arid3b	0.373638	0.0328858	AT-rich interaction domain-containing protein 3B; transcriptional regulator important for early development and oncogenesis.
Marchf9	0.662974	0.0328858	Membrane-associated RING-CH-type finger 9; E3 ubiquitin ligase involved in immune regulation.
Sphk1	1.14909	0.0328858	Sphingosine kinase 1; enzyme generating sphingosine-1-phosphate, a key lipid signaling molecule.
Gm18916	3.05493	0.0332248	Predicted gene Gm18916; uncharacterized transcript.
Gm4800	2.44784	0.0332248	Predicted gene Gm4800; uncharacterized RNA.
Tmc8	0.719739	0.0332797	Transmembrane channel-like protein 8; transmembrane protein possibly acting as an ion channel.
Kif24	0.656809	0.0332802	Kinesin family member 24; microtubule motor protein essential for centriole duplication.
Mef2b	1.16169	0.0337337	Myocyte enhancer factor 2B; transcription factor regulating muscle and neuronal differentiation.
Scarf2	0.629129	0.0337337	Scavenger receptor class F member 2; receptor involved in extracellular matrix interactions and lipid uptake.
Heg1	0.273059	0.0337398	Heart development protein with EGF-like domains 1; adhesion molecule maintaining endothelial integrity.
4933417G07Rik	2.25335	0.034016	Predicted gene 4933417G07Rik; uncharacterized noncoding transcript.
1700001O22Rik	0.558653	0.034511	Predicted gene 1700001O22Rik; uncharacterized noncoding RNA.
Egfl7	0.911027	0.0346951	EGF-like domain multiple 7; secreted angiogenic factor regulating vascular integrity and endothelial cell migration.
Gm3417	1.66931	0.0348672	Predicted gene Gm3417; uncharacterized transcript.
Gm8281	0.717759	0.0354951	Predicted gene Gm8281; uncharacterized RNA.
Slc2a9	0.926136	0.0363553	Solute carrier family 2 member 9; urate transporter mediating renal uric acid reabsorption and excretion.
Phox2a	4.19654	0.0363553	Paired-like homeobox 2a; transcription factor required for autonomic neuron differentiation.
Cbln2	0.896351	0.0363553	Cerebellin 2 precursor; synaptic organizing molecule promoting excitatory synapse formation.
Rab44	1.26488	0.036407	Ras-related protein Rab-44; large Rab GTPase participating in lysosomal trafficking and immune regulation.
Mir7049	1.06117	0.0364385	MicroRNA 7049; small regulatory RNA involved in post-transcriptional gene silencing.
Gm15703	1.79567	0.0366842	Predicted gene Gm15703; uncharacterized transcript.
Pnmt	4.0566	0.037147	Phenylethanolamine N-methyltransferase; enzyme catalyzing conversion of norepinephrine to epinephrine in adrenal medulla.
Gad1os	1.93292	0.0372565	Glutamate decarboxylase 1 overlapping transcript; noncoding RNA possibly regulating GABA synthesis.
Olfr610	6.00742	0.0379043	Olfactory receptor 610; G-protein–coupled receptor mediating odor detection.
Gm23711	2.15995	0.038089	Predicted gene Gm23711; uncharacterized transcript.
Gm8436	4.13537	0.038089	Predicted gene Gm8436; uncharacterized RNA.
Gm23341	3.91059	0.038089	Predicted gene Gm23341; uncharacterized transcript.
Coro2a	0.631983	0.0382303	Coronin 2A; actin-binding protein controlling cytoskeletal remodeling and macrophage motility.
Gm9320	1.07164	0.0387188	Predicted gene Gm9320; uncharacterized RNA.
Atp6ap1l	1.07163	0.0388309	ATPase H+ transporting accessory protein 1-like; possible proton pump component influencing lysosomal acidification.
Cxcl12	0.300791	0.0394077	C-X-C motif chemokine ligand 12; chemokine regulating stem cell homing and immune cell trafficking.
Snord89	1.97819	0.0402168	Small nucleolar RNA SNORD89; guides site-specific 2'-O-methylation of ribosomal RNA.
Pdcd1	1.22273	0.0402168	Programmed cell death protein 1; immune checkpoint receptor attenuating T cell activation.
Zfp575	0.65919	0.0402168	Zinc finger protein 575; probable transcriptional regulator involved in gene silencing.
Col18a1	0.495241	0.0402168	Collagen type XVIII alpha 1 chain; structural ECM protein forming basement membrane heparan sulfate proteoglycan.
Alg12	0.387804	0.0402168	ALG12 alpha-1,6-mannosyltransferase; enzyme in N-glycan synthesis pathway.
Gm6883	1.35139	0.0402168	Predicted gene Gm6883; uncharacterized transcript.
Cdc42bpg	1.01958	0.0402168	CDC42 binding protein kinase gamma; serine/threonine kinase involved in actin cytoskeleton organization.
Gm22753	1.63	0.0406507	Predicted gene Gm22753; uncharacterized RNA.
Scube1	0.717341	0.0406507	Signal peptide, CUB domain, and EGF-like domain-containing protein 1; secreted protein promoting angiogenesis and tissue repair.
Prlh	5.24742	0.0408155	Prolactin-releasing hormone; neuropeptide controlling prolactin secretion and energy balance.
Slc17a9	0.625708	0.0408155	Solute carrier family 17 member 9; vesicular nucleotide transporter mediating ATP release.
Dcst1	0.604325	0.0408155	DC-STAMP domain-containing protein 1; transmembrane protein required for osteoclast and giant cell fusion.
AB124611	0.812721	0.0408155	Predicted gene AB124611; uncharacterized transcript.
Gm14802	5.09293	0.0408155	Predicted gene Gm14802; uncharacterized RNA.
Gm14140	1.7868	0.0412757	Predicted gene Gm14140; uncharacterized transcript.
Magel2	1.11419	0.0412757	MAGE family member L2; testis-expressed protein with potential roles in ubiquitination.
Zfp300	0.588671	0.0413483	Zinc finger protein 300; transcriptional regulator implicated in differentiation and apoptosis.
Rassf7	1.27017	0.0413557	Ras association domain family member 7; scaffold protein regulating mitotic spindle organization and stress responses.
Ung	0.92066	0.0413777	Uracil-DNA glycosylase; DNA repair enzyme removing uracil from damaged DNA strands.
C2cd2	0.339241	0.0413777	Coiled-coil domain containing 2; centrosomal protein essential for ciliogenesis and vesicle trafficking.
Rbm19	0.529827	0.041774	RNA binding motif protein 19; RNA processing factor required for pre-rRNA maturation.
Igfals	1.1641	0.041774	Insulin-like growth factor binding acid-labile subunit; stabilizes IGF-I/IGFBP complexes in circulation.
Kifc5b	0.786483	0.041774	Kinesin family member C5B; minus-end-directed motor protein functioning in mitotic spindle assembly.
Gabpb1	0.205214	0.0418814	GA-binding protein subunit beta 1; transcription factor subunit controlling mitochondrial and immune gene expression.
Pon3	0.372458	0.0418814	Paraoxonase 3; antioxidant enzyme preventing lipid oxidation in HDL particles.
Map2k3os	1.09252	0.0422147	Mitogen-activated protein kinase kinase 3, opposite strand; antisense transcript possibly regulating MAP2K3 expression.
Rpl32-ps	2.70423	0.0424146	Ribosomal protein L32 pseudogene; nonfunctional ribosomal protein pseudogene.
Dnah17	0.91546	0.0424146	Dynein axonemal heavy chain 17; motor protein generating ciliary motility.
Duxbl1	0.619376	0.0427742	Double homeobox B-like 1; transcription factor involved in embryonic patterning.
Gm14204	1.21832	0.0437015	Predicted gene Gm14204; uncharacterized transcript.
Naglu	0.407853	0.0447874	N-acetylglucosaminidase alpha; lysosomal enzyme catalyzing degradation of heparan sulfate.
Rn7s2	0.77017	0.0448149	RNA component of signal recognition particle 7S2; small RNA guiding ribosome targeting to the ER.
Ddx43	0.470665	0.0451269	DEAD-box helicase 43; ATP-dependent RNA helicase required for germ cell development.
Gm26064	2.33119	0.0451269	Predicted gene Gm26064; uncharacterized RNA.
Lgals1	0.721526	0.0451269	Galectin 1; beta-galactoside-binding lectin modulating cell adhesion and immune regulation.
Ada	0.575345	0.045746	Adenosine deaminase; enzyme converting adenosine to inosine, critical for lymphocyte development.
Ear1	3.15107	0.045746	Eosinophil-associated ribonuclease 1; secreted ribonuclease contributing to host defense.
Vsig8	1.60517	0.046055	V-set and immunoglobulin domain-containing 8; immunoglobulin-like receptor possibly involved in cell adhesion.
Sec22c	0.284808	0.046055	SEC22 homolog C; vesicle trafficking SNARE protein mediating ER-Golgi transport.
Hhatl	0.455837	0.046055	Hedgehog acyltransferase-like; membrane enzyme modifying Hedgehog signaling proteins.
Map3k8	0.664755	0.0464106	Mitogen-activated protein kinase kinase kinase 8; kinase activating NF-κB and inflammatory pathways.
Ccdc85c	0.620251	0.0466845	Coiled-coil domain containing 85C; regulator of epithelial polarity and tight junction assembly.
Mcm3	0.465578	0.046685	Minichromosome maintenance complex component 3; helicase subunit essential for DNA replication initiation.
Rassf4	0.356014	0.0468883	Ras association domain family member 4; scaffold protein linking Ras signaling to cytoskeletal organization.
3110040N11Rik	0.458949	0.0468883	Predicted gene 3110040N11Rik; noncoding RNA.
Olfr349-ps1	4.04107	0.0471693	Olfactory receptor 349 pseudogene 1; nonfunctional olfactory receptor.
Atp6v1fnb	1.70617	0.0473166	ATPase H+ transporting V1 subunit F isoform b; component of vacuolar proton pump controlling pH homeostasis.
Gm10054	2.29881	0.0476113	Predicted gene Gm10054; uncharacterized transcript.
Rpl38	0.998553	0.0477228	Ribosomal protein L38; structural component of 60S ribosomal subunit involved in translation.
Dqx1	0.649903	0.0485486	DEAD-box helicase Q motif protein 1; RNA helicase implicated in neuronal RNA metabolism.
Nexn	0.710628	0.0485901	Nexilin F-actin binding protein; cytoskeletal adaptor stabilizing actin filaments in cardiomyocytes.
Downregulated
Kcnn2	-0.940032	6.28355e-07	Potassium calcium-activated channel subfamily N member 2; mediates neuron. after-hyperpolarization currents and regul. excitability.
Gm13872	-1.08715	4.32879e-06	Predicted gene Gm13872; uncharacterized RNA transcript.
Mras	-0.570641	6.08355e-06	Muscle RAS oncogene homolog; small GTPase involved in cell signaling and synaptic plasticity.
Nwd1	-0.969719	7.26209e-06	NACHT and WD repeat domain-containing protein 1; involved in spermatogenesis and innate immune signaling.
Lsamp	-0.581352	1.96577e-05	Limbic system-associated membrane protein; cell adhesion molecule promoting axon guidance and synapse formation.
Nrxn1	-0.44577	4.79968e-05	Neurexin 1; synaptic adhesion molecule essential for neurotransmitter release and synapse specification.
AU041133	-0.871154	5.11744e-05	Predicted gene AU041133; uncharacterized noncoding RNA.
Slc1a1	-0.539721	7.09623e-05	Solute carrier family 1 member 1; high-affinity glutamate transporter regulating synaptic glutamate levels.
Eya1	-0.491148	7.11056e-05	EYA transcriptional coactivator and phosphatase 1; developmental regulator involved in organogenesis and DNA repair.
2810459M11Rik	-0.660706	8.01093e-05	Predicted gene 2810459M11Rik; uncharacterized transcript.
Gabrb1	-0.625029	9.69557e-05	Gamma-aminobutyric acid type A receptor subunit beta1; inhibitory neurotransmitter receptor subunit mediating synaptic transmission.
Ptprz1	-0.511947	0.00011002	Protein tyrosine phosphatase receptor type Z1; receptor-type phosphatase modulating neural cell adhesion and growth.
Ctnnd2	-0.438232	0.000169305	Catenin delta 2; cadherin-associated protein controlling synaptic junctions and neuronal polarity.
Atp13a4	-0.775573	0.000182024	ATPase 13A4; cation transporter implicated in neuronal metal ion homeostasis.
Gpc5	-0.669362	0.000191651	Glypican 5; heparan sulfate proteoglycan regulating growth factor signaling during neural development.
Slc4a4	-0.728611	0.00019686	Solute carrier family 4 member 4; sodium bicarbonate cotransporter maintaining intracellular pH.
Zfp949	-0.472472	0.000223737	Zinc finger protein 949; putative transcriptional regulator.
Slc1a2	-0.83809	0.000233399	Solute carrier family 1 member 2; glial glutamate transporter clearing synaptic glutamate.
Pid1	-0.295157	0.000314735	Phosphotyrosine interaction domain-containing 1; regulator of insulin signaling and mitochondrial energy metabolism.
Gm266	-0.721129	0.000315252	Predicted gene Gm266; uncharacterized RNA.
Slc7a10	-0.684075	0.000409083	Solute carrier family 7 member 10; transporter for neutral amino acids at the blood–brain barrier.
Acsbg1	-0.731513	0.000409083	Acyl-CoA synthetase bubblegum family member 1; catalyzes activation of very long-chain fatty acids for lipid metabolism.
Farp1	-0.516114	0.000409083	FERM, RhoGEF and pleckstrin domain protein 1; mediator of axon guidance and dendritic spine morphogenesis.
Dmd	-0.49661	0.000409083	Dystrophin; cytoskeletal protein linking actin to membrane glycoproteins, stabilizing muscle fibers.
Sntg1	-0.459015	0.000414494	Syntrophin gamma 1; adapter protein binding dystrophin complex components at the plasma membrane.
Timp4	-0.526812	0.000414494	Tissue inhibitor of metalloproteinases 4; inhibits matrix metalloproteinases, regulating extracellular matrix turnover.
Dusp18	-0.774013	0.000419805	Dual specificity phosphatase 18; MAP kinase phosphatase modulating cell cycle and stress signaling.
Ppargc1a	-0.478507	0.00046448	Peroxisome proliferator-activated receptor gamma coactivator 1 alpha; transcriptional coactivator promoting mitochondrial biogenesis.
Pcdh15	-0.327197	0.000487455	Protocadherin 15; cell adhesion protein essential for hair cell stereocilia integrity and hearing.
Acsl6	-0.710342	0.00056305	Acyl-CoA synthetase long-chain family member 6; enzyme catalyzing fatty acid activation in brain and muscle.
Pcdhb22	-1.8069	0.000573885	Protocadherin beta 22; cell adhesion molecule supporting neuronal self-recognition and wiring.
Ppp2r2b	-0.427104	0.000573885	Protein phosphatase 2 regulatory subunit B beta; scaffolding subunit targeting PP2A to neuronal substrates.
Vxn	-0.439165	0.000638236	Vesicular, unknown protein Vxn; uncharacterized neuronal protein.
Slc1a4	-0.604361	0.000638236	Solute carrier family 1 member 4; transporter of neutral amino acids in neurons and glial cells.
Slc14a1	-0.578502	0.000644639	Solute carrier family 14 member 1; urea transporter maintaining osmotic balance in kidney and brain.
Pxdn	-0.562534	0.000683088	Peroxidasin homolog; extracellular peroxidase forming sulfilimine bonds in collagen IV.
Lhx2	-0.613092	0.000945831	LIM homeobox 2; transcription factor governing forebrain and eye development.
Ssx2ip	-0.57322	0.00122639	SSX family member 2 interacting protein; centrosomal protein involved in spindle function.
Arhgap12	-0.302575	0.00136581	Rho GTPase activating protein 12; regulator of actin cytoskeleton dynamics and cell migration.
Aph1b	-0.506945	0.00146334	Aph-1 homolog B; component of gamma-secretase complex in Notch signaling.
Nol4	-0.678675	0.00146334	Nucleolar protein 4; nucleolar factor potentially involved in ribosome assembly.
Cdh10	-0.322621	0.00156479	Cadherin 10; calcium-dependent adhesion molecule mediating neuronal connectivity.
Fgfr3	-0.726613	0.00159713	Fibroblast growth factor receptor 3; receptor tyrosine kinase controlling bone growth and brain development.
Grin2c	-0.966977	0.00162352	Glutamate ionotropic receptor NMDA type subunit 2C; synaptic receptor mediating calcium influx in neurons.
Sox6	-0.391469	0.0016292	SRY-box transcription factor 6; transcription factor regulating chondrogenesis and muscle differentiation.
Aqp4	-0.734851	0.00189731	Aquaporin 4; astrocyte water channel controlling brain water homeostasis.
Rgs20	-0.659447	0.00192768	Regulator of G protein signaling 20; GTPase activator modulating GPCR signaling in neurons.
Phka1	-0.444205	0.00194609	Phosphorylase kinase alpha 1; kinase regulating glycogen metabolism in muscle tissue.
Prdm8	-0.947437	0.00197816	PR domain-containing 8; histone methyltransferase influencing neural differentiation.
Eno1	-0.459334	0.00203521	Enolase 1; glycolytic enzyme catalyzing conversion of 2-phosphoglycerate to phosphoenolpyruvate.
Ntsr2	-0.889397	0.00208467	Neurotensin receptor 2; receptor for neuropeptide neurotensin modulating dopaminergic signaling.
Asrgl1	-0.419907	0.00208467	Asparaginase-like protein 1; enzyme-like protein expressed in neuronal tissues.
Dkk3	-0.600739	0.00211786	Dickkopf WNT signaling inhibitor 3; secreted antagonist of WNT signaling pathways.
Ankrd37	-0.755986	0.00250503	Ankyrin repeat domain-containing 37; stress-responsive transcriptional modulator.
Atp1a2	-0.72529	0.00255471	ATPase Na+/K+ transporting subunit alpha 2; essential ion pump maintaining neuronal resting potential.
Fut9	-0.560826	0.00261142	Fucosyltransferase 9; enzyme catalyzing synthesis of Lewis X glycan structures in the brain.
Pfkm	-0.458128	0.00279585	Phosphofructokinase, muscle type; glycolytic enzyme catalyzing key regulatory step in glucose metabolism.
Lgi4	-0.627696	0.00280687	Leucine-rich repeat LGI family member 4; axonal guidance protein promoting Schwann cell–axon interaction.
Cadm2	-0.40569	0.00286859	Cell adhesion molecule 2; adhesion molecule organizing synapses and neuronal communication.
Ampd2	-0.408538	0.00296227	AMP deaminase 2; enzyme converting AMP to IMP in energy metabolism.
Sox21	-0.553355	0.00309833	SRY-box transcription factor 21; transcription factor involved in neurogenesis.
Paqr8	-0.435052	0.00324925	Progestin and adipoQ receptor family member 8; membrane receptor modulating lipid metabolism.
Soat1	-0.370834	0.00324925	Sterol O-acyltransferase 1; enzyme catalyzing cholesterol ester formation.
Neurod6	-0.78179	0.00324925	Neuronal differentiation factor 6; basic helix-loop-helix transcription factor promoting neuronal differentiation.
Trim9	-0.572258	0.00324925	Tripartite motif-containing protein 9; E3 ubiquitin ligase involved in neuronal vesicle transport.
Zfp783	-0.402649	0.00334072	Zinc finger protein 783; predicted transcriptional regulator.
Cdkn2aip	-0.403023	0.00338372	Cyclin-dependent kinase inhibitor 2A interacting protein; negative regulator of p53-dependent cell cycle arrest.
Gm22672	-3.65416	0.00344161	Predicted gene Gm22672; uncharacterized RNA transcript.
Nrcam	-0.557678	0.00348473	Neuronal cell adhesion molecule; protein facilitating axon guidance and synapse stabilization.
Slc35d1	-0.302231	0.00382034	Solute carrier family 35 member D1; nucleotide sugar transporter localized in Golgi.
Dclk1	-0.469689	0.00393078	Doublecortin-like kinase 1; microtubule-associated kinase required for neuronal differentiation and migration.
Foxg1	-0.587709	0.00393078	Forkhead box G1; transcription factor critical for brain development and cortical neuron identity.
Bend6	-0.424139	0.00409858	BEN domain-containing protein 6; transcriptional repressor in neuronal differentiation.
Tmem47	-0.621537	0.00450052	Transmembrane protein 47; regulator of tight junction formation and cell adhesion.
Prdm16os	-0.99959	0.00465003	PR domain-containing 16 opposite strand; noncoding RNA regulating energy metabolism.
Pim2	-0.545131	0.00487808	Proto-oncogene serine/threonine-protein kinase Pim-2; kinase promoting cell survival and proliferation.
Fads2	-0.5494	0.00506132	Fatty acid desaturase 2; enzyme introducing double bonds into unsaturated fatty acids.
Scara3	-0.849298	0.00564311	Scavenger receptor class A member 3; receptor involved in binding modified lipoproteins and apoptotic cells.
Elovl4	-0.392278	0.00570225	Elongation of very long chain fatty acids protein 4; enzyme catalyzing synthesis of long-chain polyunsaturated fatty acids.
Slc1a3	-0.676569	0.00570225	Solute carrier family 1 member 3; astrocytic glutamate transporter controlling extracellular glutamate levels.
Phf6	-0.326409	0.00570225	PHD finger protein 6; chromatin regulator associated with transcriptional activation.
F3	-0.706191	0.00602565	Coagulation factor III; cell-surface receptor initiating the coagulation cascade.
Cyp7b1	-0.737835	0.00608268	Cytochrome P450 family 7 subfamily B member 1; hydroxylase involved in oxysterol and neurosteroid metabolism.
Ntrk2	-0.442772	0.00628877	Neurotrophic receptor tyrosine kinase 2; receptor for BDNF regulating synaptic plasticity and neuronal survival.
Pdp1	-0.397613	0.00631035	Pyruvate dehydrogenase phosphatase catalytic subunit 1; enzyme dephosphorylating and activating the pyruvate dehydrogenase complex.
Ece2	-0.61726	0.00650664	Endothelin converting enzyme 2; metalloprotease generating active endothelin peptides controlling vascular tone.
Fam184b	-0.432576	0.00673044	Family with sequence similarity 184 member B; uncharacterized protein potentially involved in neuronal signaling.
Cenpv	-0.467907	0.00689824	Centromere protein V; component of kinetochore complex essential for chromosome segregation.
Prdx6	-0.507204	0.00690519	Peroxiredoxin 6; antioxidant enzyme with glutathione peroxidase and phospholipase activities.
Mir124-2hg	-0.582536	0.00697454	MicroRNA 124-2 host gene; long noncoding RNA regulating neurogenesis and synaptic development.
Ddah1	-0.373502	0.00729764	Dimethylarginine dimethylaminohydrolase 1; enzyme degrading asymmetric dimethylarginine to regulate nitric oxide synthesis.
Slc25a18	-0.690615	0.00739763	Solute carrier family 25 member 18; mitochondrial glutamate carrier facilitating amino acid transport.
Gk	-0.413627	0.00784778	Glycerol kinase; enzyme catalyzing phosphorylation of glycerol to glycerol-3-phosphate in lipid metabolism.
Fezf2	-0.618912	0.00792052	Forebrain embryonic zinc finger 2; transcription factor essential for cortical neuron differentiation.
S1pr1	-0.836599	0.00805246	Sphingosine-1-phosphate receptor 1; GPCR regulating endothelial barrier and lymphocyte egress.
Rras2	-0.767853	0.00816534	Related RAS viral oncogene homolog 2; small GTPase controlling proliferation and differentiation.
Pcdh7	-0.312385	0.00823479	Protocadherin 7; cell adhesion molecule supporting neuronal connectivity.
Tle4	-0.301492	0.00823726	Transducin-like enhancer protein 4; transcriptional co-repressor modulating WNT and Notch signaling.
Plcb1	-0.500364	0.00867479	Phospholipase C beta 1; enzyme generating IP3 and DAG second messengers in neuronal signaling.
Myorg	-0.600389	0.00913591	Myogenesis regulating glycosidase; glial and muscle protein required for astrocyte and muscle function.
Akip1	-0.574805	0.00913591	A kinase interacting protein 1; mitochondrial scaffold protein regulating PKA signaling and apoptosis.
Paqr7	-0.508714	0.00975946	Progestin and adipoQ receptor family member 7; membrane receptor mediating lipid signaling.
Sparcl1	-0.709594	0.0102856	SPARC-like protein 1; extracellular matrix glycoprotein promoting synaptogenesis and angiogenesis.
Lxn	-0.585489	0.0104616	Latexin; carboxypeptidase inhibitor involved in neuronal differentiation.
Slc27a1	-0.529773	0.010586	Solute carrier family 27 member 1; long-chain fatty acid transporter facilitating lipid uptake.
2900079G21Rik	-0.854249	0.0108483	Predicted gene 2900079G21Rik; uncharacterized transcript.
Kcnk1	-0.635688	0.0110178	Potassium two pore domain channel subfamily K member 1; background potassium channel regulating resting membrane potential.
St6galnac5	-0.816574	0.0111697	ST6 beta-galactoside alpha-2,6-sialyltransferase 5; enzyme catalyzing sialylation of gangliosides in the brain.
Tspan7	-0.564882	0.0111894	Tetraspanin 7; membrane protein participating in synaptic vesicle function and cognitive development.
Ngef	-0.540258	0.0112126	Neuronal guanine nucleotide exchange factor; promotes axon outgrowth through Rho GTPase activation.
P3h3	-0.56266	0.0112126	Prolyl 3-hydroxylase 3; collagen-modifying enzyme hydroxylating proline residues.
Gpm6a	-0.538196	0.01133	Glycoprotein M6A; neuronal membrane protein involved in neurite outgrowth and synaptogenesis.
Ppp1r3c	-0.722763	0.0116212	Protein phosphatase 1 regulatory subunit 3C; modulator of glycogen metabolism through PP1 targeting.
Xylt1	-0.303239	0.0116446	Xylosyltransferase 1; enzyme initiating glycosaminoglycan biosynthesis on proteoglycan cores.
Shd	-0.355326	0.0118152	SH2 domain-containing protein D; neuronal signaling adaptor protein.
Ackr1	-0.670972	0.0123335	Atypical chemokine receptor 1; decoy receptor sequestering chemokines and regulating inflammation.
Fkbp10	-0.739372	0.0123944	FK506 binding protein 10; collagen chaperone in the endoplasmic reticulum assisting proper folding.
Uhrf1bp1l	-0.312299	0.0124045	UHRF1 binding protein 1-like; nuclear protein involved in chromatin assembly and DNA methylation.
Plppr5	-0.399215	0.012564	Phospholipid phosphatase-related protein type 5; enzyme modulating lysophosphatidic acid signaling.
Scg3	-0.569376	0.0130217	Secretogranin III; neuroendocrine secretory granule protein involved in hormone packaging.
Gm5837	-0.446271	0.0132421	Predicted gene Gm5837; uncharacterized RNA.
Mfge8	-0.810358	0.0136974	Milk fat globule-EGF factor 8; opsonin promoting apoptotic cell clearance and tissue repair.
Pygb	-0.360588	0.0137535	Brain glycogen phosphorylase; enzyme catalyzing glycogen degradation to glucose-1-phosphate in the brain.
Ahcyl1	-0.290321	0.0137535	Adenosylhomocysteinase-like protein 1; enzyme regulating methylation reactions by hydrolyzing S-adenosylhomocysteine.
4930480K15Rik	-0.786277	0.0137535	Predicted gene 4930480K15Rik; uncharacterized transcript.
Slitrk2	-0.481775	0.0137535	SLIT and NTRK-like family member 2; neuronal adhesion protein modulating synapse formation.
Kcnd3	-0.361465	0.0147216	Potassium voltage-gated channel subfamily D member 3; subunit controlling neuronal excitability.
Fam184a	-0.3574	0.0149821	Family with sequence similarity 184 member A; protein possibly involved in neuronal differentiation.
Syne1	-0.384011	0.0156466	Spectrin repeat-containing nuclear envelope protein 1; structural protein linking cytoskeleton to the nuclear envelope.
Fndc4	-0.510171	0.0166064	Fibronectin type III domain-containing protein 4; secreted factor promoting metabolic adaptation and inflammation control.
Plpp3	-0.676267	0.0169258	Phospholipid phosphatase 3; enzyme regulating WNT and vascular signaling via lipid phosphate metabolism.
Vegfa	-0.666285	0.0170013	Vascular endothelial growth factor A; master regulator of angiogenesis and vascular permeability.
Plcd4	-0.654665	0.0172407	Phospholipase C delta 4; enzyme generating inositol phosphates for calcium signaling.
Hapln1	-0.69111	0.0173867	Hyaluronan and proteoglycan link protein 1; stabilizes extracellular matrix by linking hyaluronan to proteoglycans.
Astn1	-0.352926	0.017488	Astrotactin 1; neuronal adhesion molecule essential for glial-guided migration of neurons.
Ccdc190	-1.19238	0.0179735	Coiled-coil domain-containing protein 190; uncharacterized protein possibly regulating vesicle transport.
Itpr2	-0.241208	0.0180368	Inositol 1,4,5-trisphosphate receptor type 2; intracellular calcium release channel in non-neuronal cells.
Rimklb	-0.433707	0.0182908	Ribosomal modification kinase-like protein B; kinase modifying ribosomal proteins to regulate translation.
Gja1	-0.790407	0.0195987	Gap junction protein alpha 1; connexin forming intercellular channels for electrical coupling and signaling.
Sox9	-0.596243	0.0196213	SRY-box transcription factor 9; transcriptional regulator required for chondrogenesis and sex determination.
Prex2	-0.668694	0.0203114	Phosphatidylinositol-3,4,5-trisphosphate-dependent Rac exchange factor 2; activates RAC1 and controls cell migration and axon guidance.
Dbx2	-0.58485	0.0204941	Developing brain homeobox protein 2; transcription factor that directs patterning of the spinal cord and brainstem.
Cbs	-0.460585	0.0204941	Cystathionine beta-synthase; enzyme catalyzing homocysteine and serine to form cystathionine in the transsulfuration pathway.
Lsm8	-0.350317	0.0205938	LSM8 homolog; core component of the U6 snRNP complex involved in mRNA splicing.
Slc9a3r1	-0.555298	0.0215826	Solute carrier family 9 member 3 regulator 1; scaffolding protein controlling localization and regulation of NHE3 and CFTR.
Ndrg2	-0.496005	0.0218695	N-myc downstream-regulated gene 2; stress-responsive protein promoting cell differentiation and tumor suppression.
Ttyh1	-0.515937	0.0222733	Tweety family member 1; calcium-activated chloride channel regulating neuronal excitability.
Slc38a3	-0.492162	0.0224594	Solute carrier family 38 member 3; sodium-coupled transporter for glutamine and other amino acids.
Pla2g7	-0.800241	0.0226057	Phospholipase A2 group VII; enzyme hydrolyzing platelet-activating factor and oxidized phospholipids.
Zfp91	-0.331632	0.0226057	Zinc finger protein 91; transcriptional regulator modulating NF-κB and apoptosis pathways.
Sfxn5	-0.40678	0.0229092	Sideroflexin 5; mitochondrial transporter implicated in amino acid and iron metabolism.
Mthfd2l	-0.417529	0.023171	Methylenetetrahydrofolate dehydrogenase 2-like; mitochondrial enzyme participating in folate-mediated one-carbon metabolism.
Rspry1	-0.239935	0.023252	Ring finger and SPRY domain-containing protein 1; adaptor protein involved in receptor signaling modulation.
Pitpnc1	-0.256499	0.0234801	Phosphatidylinositol transfer protein cytoplasmic 1; lipid-transfer protein facilitating phosphatidylinositol recycling at membranes.
Plppr1	-0.436745	0.023621	Phospholipid phosphatase-related protein type 1; lipid-modifying enzyme regulating synaptic membrane dynamics.
B3galt2	-0.503755	0.0239285	Beta-1,3-galactosyltransferase 2; glycosyltransferase required for synthesis of poly-N-acetyllactosamine structures.
Slc35f1	-0.398001	0.0248349	Solute carrier family 35 member F1; nucleotide-sugar transporter localized to the Golgi apparatus.
Adcy8	-0.379639	0.0255197	Adenylate cyclase 8; membrane enzyme converting ATP to cAMP, essential for neuronal signaling and memory formation.
P4ha2	-0.574104	0.0256178	Prolyl 4-hydroxylase subunit alpha-2; enzyme catalyzing collagen proline hydroxylation, crucial for extracellular matrix stability.
Ppfibp1	-0.285151	0.0256742	PPFIA binding protein 1; adaptor protein involved in synaptic vesicle trafficking and focal adhesion.
Dnajb1	-0.433628	0.0257425	DnaJ heat shock protein family member B1; chaperone protein assisting in protein folding and stress response.
Ptprt	-0.453184	0.0259717	Protein tyrosine phosphatase receptor type T; receptor-type phosphatase involved in synapse organization and axon guidance.
Kcne1l	-0.76491	0.0259717	Potassium voltage-gated channel subfamily E regulatory beta subunit 1-like; modulator of cardiac and neuronal potassium channel kinetics.
Mir1904	-1.97208	0.0272369	MicroRNA 1904; small regulatory RNA implicated in post-transcriptional gene silencing.
Bcan	-0.543579	0.027694	Brevican core protein; extracellular matrix proteoglycan involved in perineuronal net formation.
Lcat	-0.711126	0.0277548	Lecithin-cholesterol acyltransferase; enzyme catalyzing esterification of cholesterol in plasma.
Nexmif	-0.630841	0.0277548	Neurite extension and migration factor; neural cell adhesion protein required for axon growth and cognitive development.
Ncoa1	-0.31184	0.0279239	Nuclear receptor coactivator 1; transcriptional coactivator that interacts with nuclear hormone receptors to enhance transcription.
Slc25a12	-0.206545	0.028115	Solute carrier family 25 member 12; mitochondrial aspartate-glutamate carrier regulating energy metabolism.
Rab10os	-0.455964	0.0285516	Rab10 opposite strand; antisense transcript possibly regulating Rab10 expression.
Slc30a10	-0.655552	0.0292545	Solute carrier family 30 member 10; manganese and zinc transporter maintaining metal ion homeostasis.
Matn4	-0.436463	0.0294613	Matrilin 4; extracellular matrix adaptor protein linking collagen and proteoglycans.
Rpl31-ps12	-1.23897	0.0295066	Ribosomal protein L31 pseudogene 12; nonfunctional ribosomal pseudogene.
Pcdh20	-0.538385	0.0309616	Protocadherin 20; calcium-dependent adhesion protein involved in neural circuit formation.
Lrp3	-0.39162	0.0326818	Low-density lipoprotein receptor-related protein 3; receptor mediating endocytosis and signal transduction.
Fabp7	-0.632784	0.0327188	Fatty acid binding protein 7; brain fatty acid-binding protein regulating fatty acid metabolism in astrocytes.
D030056L22Rik	-0.405444	0.0332248	Predicted gene D030056L22Rik; uncharacterized transcript.
Tomm40	-0.291589	0.0343077	Translocase of outer mitochondrial membrane 40; protein import receptor component of the TOM complex.
Sgcz	-0.709236	0.0346498	Sarcoglycan zeta; transmembrane protein in dystrophin-glycoprotein complex maintaining muscle integrity.
Ttc19	-0.34328	0.0346498	Tetratricopeptide repeat domain 19; mitochondrial protein regulating respiratory chain assembly.
Drp2	-0.506767	0.0364243	Dystrophin-related protein 2; axonal protein involved in myelin maintenance.
Zeb1	-0.285228	0.0366842	Zinc finger E-box-binding homeobox 1; transcription factor controlling epithelial-mesenchymal transition and development.
Cav1	-0.386478	0.0368863	Caveolin 1; integral membrane protein organizing caveolae and regulating signal transduction.
Sbk1	-0.357214	0.0376204	SH3-binding kinase 1; serine/threonine kinase involved in stress-activated signaling pathways.
Id4	-0.681336	0.0379043	Inhibitor of DNA binding 4; helix-loop-helix protein suppressing differentiation and maintaining progenitor state.
Lrig1	-0.319903	0.038089	Leucine-rich repeats and immunoglobulin-like domains protein 1; negative regulator of epidermal growth factor receptor signaling.
Lgi1	-0.555614	0.038089	Leucine-rich glioma inactivated protein 1; secreted synaptic protein mediating axon guidance and epilepsy susceptibility.
Frrs1l	-0.538994	0.0384941	Ferric-chelate reductase 1-like protein; modulator of AMPA receptor trafficking and synaptic plasticity.
Elp3	-0.239454	0.0392742	Elongator acetyltransferase complex subunit 3; component of the tRNA modification complex essential for translation fidelity.
Astn2	-0.287155	0.0394077	Astrotactin 2; neuronal adhesion molecule guiding migration and axon extension.
Mical2	-0.675986	0.0394077	Microtubule-associated monooxygenase, calponin, and LIM domain-cont. protein 2; actin-regulating enzyme ctr. cytoskeleton remodeling.
Mir99ahg	-0.336686	0.0397834	MicroRNA-99a host gene; long noncoding RNA regulating cell proliferation and differentiation.
Tcf4	-0.250308	0.0400956	Transcription factor 4; bHLH transcription factor essential for cortical and hippocampal development.
Pqbp1	-0.405171	0.0401554	Polyglutamine-binding protein 1; nuclear protein modulating transcription and RNA splicing.
Ptov1	-0.322774	0.0401619	Prostate tumor overexpressed gene 1; nuclear protein involved in transcriptional regulation and cell proliferation.
Khdrbs2	-0.406413	0.0402168	KH RNA binding domain containing, signal transduction associated 2; RNA-binding protein influencing splicing and synaptic signaling.
Nudt10	-0.45549	0.0406508	Nudix hydrolase 10; enzyme that hydrolyzes oxidized nucleotides, protecting cells from mutagenic damage.
Gm5577	-0.637968	0.0408155	Predicted gene Gm5577; uncharacterized predicted transcript.
Smoc1	-0.42236	0.0411166	SPARC-related modular calcium-binding protein 1; extracellular matrix glycoprotein promoting tissue morphogenesis and angiogenesis.
Negr1	-0.452813	0.0414662	Neuronal growth regulator 1; membrane protein promoting neurite outgrowth and synaptic connectivity.
Kcnd2	-0.505619	0.0416052	Potassium voltage-gated channel subfamily D member 2; voltage-dependent K⁺ channel contributing to neuronal excitability.
Myl6	-0.494651	0.041774	Myosin light chain 6; regulatory light chain modulating smooth muscle and nonmuscle myosin function.
Clu	-0.711522	0.041774	Clusterin; multifunctional chaperone involved in lipid transport, apoptosis regulation, and neuroprotection.
Unc119	-0.4474	0.0421666	Unc-119 lipid-binding chaperone; protein that assists trafficking of lipidated signaling molecules in neurons.
Fyn	-0.259687	0.0424146	Tyrosine-protein kinase Fyn; Src-family kinase mediating synaptic signaling, growth cone guidance, and myelination.
Morf4l2	-0.331908	0.0424146	Mortality factor 4 like 2; chromatin-associated factor implicated in transcriptional regulation and senescence.
Plod2	-0.454248	0.0427652	Procollagen-lysine 2-oxoglutarate 5-dioxygenase 2; enzyme that hydroxylates lysine residues in collagen, essential for matrix stability.
Bmpr1b	-0.677053	0.0428535	Bone morphogenetic protein receptor type 1B; receptor kinase involved in bone and neural development through SMAD signaling.
Lgr4	-0.314755	0.0436968	Leucine-rich repeat-containing G-protein coupled receptor 4; receptor influencing Wnt signaling and organ development.
Galnt3	-0.354889	0.0450064	Polypeptide N-acetylgalactosaminyltransferase 3; enzyme initiating mucin-type O-glycosylation in secretory proteins.
Mir15a	-3.83124	0.0451269	MicroRNA 15a; small noncoding RNA regulating apoptosis and cell cycle progression via BCL2 repression.
Maged1	-0.373426	0.0451269	Melanoma antigen family D1; cytoplasmic protein implicated in apoptosis regulation and neuronal differentiation.
Acss1	-0.262646	0.045171	Acyl-CoA synthetase short-chain family member 1; enzyme activating acetate and short-chain fatty acids for metabolism.
Gria2	-0.610626	0.045746	Glutamate ionotropic receptor AMPA type subunit 2; ligand-gated ion channel mediating excitatory neurotransmission in the brain.
Caskin1	-0.420684	0.045746	Cask-interacting protein 1; scaffold protein linking synaptic adhesion molecules to the actin cytoskeleton.
Mrps34	-0.500145	0.045746	Mitochondrial ribosomal protein S34; component of the small mitochondrial ribosomal subunit involved in translation.
Ift74	-0.415666	0.0457473	Intraflagellar transport protein 74; structural component essential for cilia assembly and maintenance.
Mgll	-0.371566	0.047024	Monoglyceride lipase; enzyme hydrolyzing monoacylglycerols, regulating endocannabinoid and lipid metabolism.
Rfx4	-0.399248	0.0485901	Regulatory factor X4; transcription factor critical for ciliogenesis and brain development.
Lrrtm3	-0.297022	0.0485968	Leucine-rich repeat transmembrane neuronal 3; synaptic adhesion molecule contributing to excitatory synapse formation.
Scarna3a	-2.86675	0.0488918	Small Cajal body-specific RNA 3A; small RNA guiding modification of snRNAs within Cajal bodies.
Grk3	-0.30946	0.0490987	G-protein coupled receptor kinase 3; kinase phosphorylating GPCRs to regulate receptor desensitization and signaling.
4930565N06Rik	-1.36171	0.0490987	Predicted gene 4930565N06Rik; uncharacterized transcript.
Exog	-0.245489	0.0491277	Exonuclease G; mitochondrial enzyme participating in mitochondrial DNA repair and replication.
Gpc6	-0.498557	0.0492345	Glypican 6; heparan sulfate proteoglycan modulating growth factor signaling during development.
Ints13	-0.263042	0.0499496	Integrator complex subunit 13; nuclear protein involved in transcriptional termination and small nuclear RNA processing.
