# Supplementary material for: A stage-resolved neuron-glia transcriptional atlas reveals a glial inflammatory pivot in epilepsy
Source: Research Square preprint supplement (doi:10.21203/rs.3.rs-8807447/v1), 2026-02-20
Supplement: Supplementary file 4 [file bc28ab05280028ce4bfaa109.xlsx]

## Sheet: Sheet1
Differentially expressed genes in neurons and glia at 24hpi
Neurons
Gene symbol	logFC	FDR	Gene description
Upregulated
Ptgs2	3.07932	3.82287e-13	Prostaglandin-endoperoxide synthase-2; inducible prostaglandin synthase driving inflammatory and activity-dependent signaling.
Srxn1	2.1543	3.82287e-13	Sulfiredoxin-1; repairs over-oxidized peroxiredoxins to restore cellular antioxidant capacity.
Pmepa1	2.39321	3.82287e-13	Transmembrane PMEPA1; feedback inhibitor of TGF-β/SMAD signaling and epithelial responses.
Vgf	2.43325	3.82287e-13	VGF neuropeptide precursor; secreted peptides regulating synaptic plasticity, energy balance, and neuroendocrine output.
Nptx2	3.66103	3.82287e-13	Neuronal pentraxin-2; secreted synaptic organizer promoting AMPA-receptor clustering and circuit remodeling.
Gipr	3.77391	3.82287e-13	GIP receptor; GPCR coupling nutrient signals to cAMP pathways and neuroendocrine responses.
Tll1	3.71683	3.82287e-13	Tolloid-like metalloprotease-1; extracellular protease in matrix/BMP pathway remodeling.
Inhba	4.15553	3.82287e-13	Inhibin beta A (activin A subunit); TGF-β family ligand controlling neuroendocrine and inflammatory programs.
Pcdh8	2.01152	3.82287e-13	Protocadherin-8; cell-adhesion molecule in neuron–neuron recognition and connectivity.
Acan	3.78488	6.2556e-13	Aggrecan; chondroitin sulfate proteoglycan of perineuronal nets modulating plasticity.
Car12	1.80421	6.2556e-13	Carbonic anhydrase 12; membrane enzyme regulating extracellular pH and ion transport.
Rgs4	2.35925	8.60145e-13	RGS4; G-protein GAP terminating GPCR signaling to shape neuronal excitability.
Sbno2	2.2737	1.58796e-12	Strawberry notch-like 2; helicase-like transcriptional coregulator linked to Notch/inflammatory programs.
Csrnp1	2.36098	3.93209e-12	CSRNP1; cysteine-serine-rich nuclear transcription factor associated with apoptosis/development.
Stk40	1.95839	8.71614e-12	STK40; serine/threonine kinase that dampens NF-κB/BMP signaling in differentiation.
Synpo	1.3636	1.05368e-11	Synaptopodin; actin-binding scaffold in dendritic spines supporting synaptic plasticity.
Sorcs3	2.36408	7.73119e-11	SORCS3; VPS10 neuroreceptor modulating synaptic transmission and learning.
Cgref1	2.19931	1.43599e-10	CGREF1; Ca²⁺-binding membrane protein in adhesion/survival signaling.
Mapk4	2.24943	3.46983e-10	MAPK4 (ERK4); atypical MAPK in cytoskeletal and stress responses.
Pcdh11x	2.39001	4.86596e-10	Protocadherin 11X; adhesion molecule contributing to neuronal wiring/lateralization.
Sv2c	2.63037	6.10547e-10	SV2C; synaptic vesicle glycoprotein regulating neurotransmitter release probability.
Serpina3n	2.01803	7.03674e-10	Serpin A3N; secreted protease inhibitor induced by inflammation and neural injury.
Hspa1b	4.9818	1.5669e-09	HSPA1B; inducible Hsp70 chaperone maintaining proteostasis under stress.
Gm34567	2.43052	8.83376e-09	Predicted gene (Gm34567); uncharacterized/non-coding locus.
Gfra1	1.52597	1.09659e-08	GFRα1; GDNF co-receptor for RET signaling in neuronal survival/axon guidance.
Megf11	2.24364	1.11047e-08	MEGF11; multiple EGF-like repeat adhesion protein in dendrite/axon development.
Cltb	1.19657	3.42413e-08	Clathrin light chain B; endocytic coat subunit controlling vesicle formation.
Sh2d5	1.77652	4.08622e-08	SH2D5; synaptic adaptor implicated in vesicle cycling and memory.
Hspa1a	5.67606	5.61086e-08	HSPA1A; stress-inducible cytosolic Hsp70 chaperone.
Spred1	1.61502	1.24895e-07	SPRED1; Ras/MAPK inhibitor acting downstream of RTKs.
Sema3e	1.29254	1.24895e-07	Semaphorin-3E; secreted axon-guidance cue for targeting/refinement.
Fosl2	2.17976	1.6068e-07	FOSL2 (AP-1); transcriptional regulator of proliferation and differentiation.
Sik1	2.26971	1.96072e-07	SIK1; AMPK-related kinase mediating CREB-dependent transcription and metabolic stress responses.
Cd1d1	3.16842	2.20353e-07	CD1d1; lipid-antigen presenter that activates invariant NKT cells (neuro-immune crosstalk).
Slc6a8	1.34485	2.70174e-07	SLC6A8; Na⁺/Cl⁻-dependent creatine transporter for neuronal energy buffering.
Odc1	1.69059	3.43086e-07	ODC1; rate-limiting polyamine biosynthesis enzyme for growth/repair.
Prex1	2.05595	4.78507e-07	PREX1; PI3K-activated Rac GEF linking PIP₃ to cytoskeletal dynamics.
Zbtb46	1.64309	6.02465e-07	ZBTB46; BTB/POZ zinc-finger transcription factor in differentiation programs.
Smim43	2.67846	6.26742e-07	SMIM43; small single-pass membrane protein, poorly characterized.
Fosb	3.18017	8.47174e-07	Immediate-early AP-1 subunit involved in plasticity and stress responses.
Gpr3	2.01801	9.17548e-07	Constitutively active GPCR 3 elevating cAMP in neurons/oocytes.
Dgat2l6	3.40257	1.09625e-06	DGAT2-like acyltransferase; lipid-metabolism factor (poorly characterized).
Sstr2	2.20934	1.11418e-06	Somatostatin receptor-2; Gi-coupled GPCR dampening neurotransmission/hormone release.
Kdm6b	1.57248	1.24136e-06	KDM6B (JMJD3); H3K27 demethylase activating genes in inflammatory/developmental responses.
Cemip2	1.52292	1.78586e-06	CEMIP2; extracellular hyaluronan/ECM-processing factor.
Rgs7	1.31967	2.55021e-06	RGS7; GAP modulating Gi/o-coupled GPCR signaling in neurons.
Chga	1.59699	3.87082e-06	Chromogranin A; neuroendocrine granule protein and peptide precursor.
Scube1	1.69265	3.87082e-06	SCUBE1; secreted EGF-like protein involved in vascular development/signaling.
Socs3	4.40391	4.85831e-06	SOCS3; STAT-inducible inhibitor that terminates JAK/STAT signaling.
Tgfb1i1	1.67358	5.03905e-06	TGFB1I1 (Hic-5); LIM-domain focal-adhesion scaffold integrating TGF-β/steroid signals.
Cdk18	2.06383	5.30725e-06	Cyclin-dependent kinase 18; proline-directed Ser/Thr kinase implicated in neurite outgrowth and cell-cycle control.
Homer1	1.43069	5.37925e-06	Postsynaptic scaffold that links group I mGluRs to Ca²⁺ signaling; supports synaptic plasticity and spine structure.
Spred3	1.14315	7.56516e-06	Sprouty-related EVH1-domain protein 3; inhibitor of RTK/Ras-MAPK signaling in neurons.
Vegfa	1.83975	1.10721e-05	Vascular endothelial growth factor A; secreted angiogenic and neurotrophic factor promoting vessel growth and neurite outgrowth.
Itpkc	1.85106	1.1406e-05	Inositol-trisphosphate 3-kinase C; converts IP₃ to IP₄, tuning Ca²⁺ signals and receptor pathways.
Armc9	1.16751	1.48719e-05	Armadillo-repeat protein associated with cilia/cytoskeleton; roles in development and signaling.
Ccn1	3.10154	1.52445e-05	Matricellular CCN1/CYR61; ECM-associated ligand that promotes adhesion, migration, angiogenesis, and repair.
Kcnip3	1.74733	1.7291e-05	KChIP3/DREAM/Calsenilin; Ca²⁺-binding transcriptional repressor and auxiliary subunit for Kv4 K⁺ channels.
Grasp	1.1234	2.07068e-05	GRASP scaffold; adaptor in ARF/PI3K pathways regulating membrane trafficking and signaling.
Smad7	1.79024	2.07068e-05	Inhibitory SMAD that blocks TGF-β receptor signaling to provide negative feedback.
Npas4	3.34166	2.3231e-05	Activity-regulated transcription factor that enhances inhibitory synapse development and neuroprotection.
Arr3	3.06283	2.3435e-05	β-arrestin-2; terminates GPCR signaling and scaffolds MAPK cascades to shape receptor desensitization.
Arid5b	1.29657	2.40934e-05	AT-rich interaction domain protein 5B; RNA-stability/immune-mRNA regulator controlling inflammatory gene expression.
Uck2	1.32059	2.42678e-05	Uridine-cytidine kinase 2; pyrimidine-salvage enzyme sustaining RNA/DNA synthesis.
Frmd6	1.10951	2.42678e-05	FERM-domain protein linking actin to membranes; influences Hippo signaling and cell shape.
Lbh	2.88437	3.14449e-05	Transcriptional co-regulator in Wnt/TGF-β pathways; required in limb bud/heart development and differentiation.
Parp3	3.13035	4.32179e-05	Poly(ADP-ribose) polymerase-3; mono-ADP-ribosyltransferase in DNA-damage signaling and spindle integrity.
Vim	2.87866	4.46047e-05	Vimentin intermediate filament; cytoskeletal component of reactive glia/endothelium and migrating cells.
Ier2	2.38204	4.46047e-05	Immediate-early response protein 2; activity-induced transcriptional regulator in growth and stress pathways.
Trib1	2.53595	5.23897e-05	Tribbles pseudokinase 1; scaffold/pseudokinase modulating MAPK and lipid-metabolism signaling.
Fgfr1	1.16096	5.2612e-05	Fibroblast growth factor receptor 1; RTK controlling proliferation, axon outgrowth, and synaptic development.
Klf6	1.46685	6.55737e-05	Krüppel-like factor 6; stress-induced transcription factor that promotes repair and differentiation programs.
C2cd4b	2.30752	6.8613e-05	C2 calcium-dependent domain protein 4B; signaling protein with C2 domain; function incompletely defined.
Rara	1.57838	6.8613e-05	Retinoic acid receptor-α; nuclear receptor directing RA-dependent transcription in patterning and differentiation.
Mapkapk2	1.11044	9.24262e-05	MAPK-activated protein kinase 2; p38-dependent kinase mediating inflammatory/stress responses and cytoskeletal remodeling.
Thbs1	2.94271	9.88981e-05	Thrombospondin-1; matricellular glycoprotein regulating angiogenesis, synaptogenesis, and immune signaling.
Aloxe3	1.42861	9.88981e-05	Arachidonate lipoxygenase 3; epidermal/epithelial lipoxygenase involved in lipid barrier and oxidative responses.
Gadd45g	2.8145	0.000114068	GADD45γ; stress-responsive modulator of MAPK signaling and chromatin plasticity.
Nfil3	1.61319	0.00012221	NFIL3/E4BP4; bZIP transcription factor integrating circadian and immune programs.
Ier5	1.59627	0.000124896	Immediate-early response gene 5; stress-inducible factor in growth control and cell-cycle exit.
Scrt2	1.39575	0.000125932	Scratch-family zinc-finger 2; neuronal transcription factor involved in differentiation.
Slc37a1	1.56258	0.000125932	ER membrane antiporter SLC37A1; transports glucose-6-phosphate vs phosphate to tune metabolism.
Dlgap4	1.06848	0.00013972	DLG-associated protein 4 family member; MAGUK scaffold at excitatory synapses regulating receptor complexes.
Adgrl3	1.21919	0.00013972	Adhesion GPCR L3 (latrophilin-4); synaptic adhesion receptor influencing neurotransmission and wiring.
Zdhhc22	1.86785	0.000139781	Palmitoyltransferase ZDHHC22; S-acyltransferase modulating synaptic protein trafficking.
9330188P03Rik	3.18906	0.000140823	Predicted RIKEN transcript (9330188P03Rik); uncharacterized/non-coding locus.
Btg2	1.72401	0.000141856	BTG anti-proliferation factor 2; transcriptional co-regulator that restrains growth and supports differentiation.
Ncs1	1.07454	0.000141856	Neuronal calcium sensor-1; Ca²⁺-binding protein enhancing neurotransmitter release and plasticity.
St6galnac4	1.18927	0.00014632	ST6 N-acetylgalactosaminide α-2,6-sialyltransferase 4; adds terminal sialic acid to O-glycans in neurons.
Rasa4	1.92009	0.000147979	RAS p21 protein activator 4; Ca²⁺-dependent RasGAP controlling receptor-induced ERK signaling.
Pros1	2.35388	0.000148863	Protein S (alpha); secreted anticoagulant/anti-inflammatory ligand with neuroprotective effects.
Adra1a	1.96057	0.000153432	Adrenergic receptor α1A; Gq-coupled GPCR elevating Ca²⁺ to modulate excitability and contraction.
Serinc2	1.80685	0.000168911	Serine incorporator 2; membrane protein facilitating serine/serine-derived lipid incorporation.
Cdkn1a	2.86786	0.000200788	CDK inhibitor p21 (Cdkn1a); p53-inducible blocker of CDKs mediating cell-cycle arrest.
Pip5k1c	1.06618	0.000201005	PI(4)P 5-kinase type-1C; generates PI(4,5)P₂ for endocytosis, exocytosis, and actin regulation.
Nr4a1	1.76883	0.000206551	Immediate-early nuclear receptor Nur77; activity-regulated transcription factor in metabolism and apoptosis.
Sox11	1.51772	0.000226611	SOX11 transcription factor; neurodevelopmental regulator driving axon growth and survival.
Itga2b	1.9984	0.000241631	Integrin αIIb; platelet integrin α-subunit (neuronal roles limited).
Galnt14	1.39753	0.000241631	Polypeptide N-acetylgalactosaminyltransferase 14; initiates mucin-type O-glycosylation on select substrates.
Plk2	0.825296	0.000250468	Polo-like kinase 2; kinase in centriole/synaptic homeostasis and activity-dependent remodeling.
Kazn	1.37005	0.000267116	Kazrin; cytoskeletal and desmosomal scaffold coordinating adhesion, actin organization, and endocytosis.
Tmem117	1.19945	0.000276951	Transmembrane protein 117; multi-pass membrane protein implicated in survival and signaling regulation.
Mcl1	1.10514	0.000305104	Myeloid cell leukemia 1; anti-apoptotic BCL-2 family member that maintains mitochondrial integrity.
Gadd45b	2.16756	0.000305386	GADD45β; stress- and learning-induced epigenetic regulator affecting MAPK and NF-κB pathways.
Hpcal4	1.15518	0.000320492	Hippocalcin-like protein 4; neuronal calcium sensor influencing synaptic transmission.
Fndc9	2.97958	0.000340758	FNDC9; secreted or ECM-associated protein involved in neurite outgrowth and cell signaling.
Pcsk5	1.3393	0.00034398	Proprotein convertase subtilisin/kexin type 5; secretory pro-protein processing enzyme reg. maturation of ligands and receptors.
Tet3	1.41303	0.000361387	TET3; dioxygenase catalyzing DNA demethylation in activity-dependent transcriptional plasticity.
Mapk6	1.50299	0.000361387	MAPK6 (ERK3); atypical MAPK involved in cytoskeletal dynamics, motility, and differentiation.
Plpp4	2.56072	0.000385956	Phospholipid phosphatase 4; enzyme dephosphorylating lipid phosphates such as LPA and S1P, modulating signaling.
Dot1l	1.11588	0.000388897	DOT1L histone methyltransferase; methylates histone H3K79 during transcriptional elongation and DNA repair.
Jun	1.08778	0.000431281	AP-1 transcription factor JUN; immediate-early transcriptional regulator in plasticity and stress.
Dusp4	1.85273	0.000454607	DUSP4; nuclear MAPK phosphatase providing feedback inhibition to ERK and JNK pathways.
Dclk1	0.891902	0.000476106	Doublecortin-like kinase 1; microtubule-binding kinase directing neurite development and differentiation.
Ptp4a3	1.12028	0.00049843	PTP4A3 (PRL-3); prenylated phosphatase that enhances motility, migration, and invasion signaling.
Pfkfb3	1.13816	0.000539596	PFKFB3; enzyme controlling glycolytic flux through synthesis of fructose-2,6-bisphosphate.
Trib2	1.27213	0.000543003	TRIB2; pseudokinase modulating MAPK and AKT pathways in cell fate and survival.
Grb2	0.942438	0.000543695	GRB2; adaptor linking receptor tyrosine kinases to RAS/MAPK activation cascades.
Adam19	1.53118	0.000570208	ADAM19; metalloprotease responsible for ectodomain shedding and ECM remodeling.
Ptgs1	2.12561	0.000599794	COX-1 (Ptgs1); constitutive prostaglandin synthase generating homeostatic eicosanoids.
Lmna	0.844505	0.000618555	Lamin A/C; nuclear lamina filament protein preserving nuclear architecture and chromatin organization.
Egr3	1.47795	0.000618555	EGR3; activity-induced transcription factor regulating synaptic growth and neuronal plasticity.
Elmo1	1.39946	0.000639137	ELMO1; Rac1 activator that coordinates cytoskeletal remodeling and engulfment processes.
Efhd2	1.38547	0.000667603	EF-hand domain protein 2; calcium-binding protein influencing cytoskeletal and vesicular organization.
Tiparp	1.31271	0.000692119	TIPARP; poly(ADP-ribose) transferase regulated by AHR signaling and stress, modifying transcription.
Mt1	1.74191	0.000733146	Metallothionein-1; cysteine-rich protein buffering metals and reactive oxygen species.
Dusp5	1.51007	0.000733146	DUSP5; nuclear ERK phosphatase providing stimulus-dependent MAPK feedback control.
Mir212	3.08188	0.000791955	miR-212; activity-induced microRNA that modulates dendritic growth and synaptic plasticity.
Ankrd33b	1.29911	0.000791955	ANKRD33B; ankyrin-repeat transcriptional regulator linked to photoreceptor differentiation and immunity.
Fos	3.18268	0.000833826	FOS; immediate-early AP-1 component directing gene programs for growth and neuronal adaptation.
Samd4	1.83373	0.000905281	SAMD4; RNA-binding protein repressing translation in activity-dependent mRNA control.
Adamts1	1.52872	0.000953178	ADAMTS1; secreted metalloprotease with thrombospondin motifs remodeling extracellular matrix.
Sh3pxd2b	1.42775	0.00110724	SH3PXD2B; actin-regulating adaptor in invadopodia and membrane protrusion formation.
Nt5dc3	1.23692	0.00114912	NT5DC3; cytosolic 5'-nucleotidase in nucleotide metabolism and neuronal maintenance.
Trnp1	1.22423	0.00117868	TRNP1; chromatin-binding regulator promoting neural stem-cell self-renewal and cortical development.
Itgav	1.1912	0.00121921	Integrin αV; receptor for ECM proteins mediating adhesion, migration, and synaptogenesis.
Igsf9b	2.1612	0.00136876	IGSF9B; immunoglobulin superfamily adhesion molecule supporting inhibitory synapses.
Sphk1	2.57016	0.00136876	SPHK1; sphingosine kinase generating S1P lipid messenger that promotes survival and Ca²⁺ signaling.
Furin	1.12576	0.00149852	FURIN; pro-protein convertase processing many secretory precursors to active forms.
Lhfp	1.88943	0.00151117	LHFP; tetraspan-like membrane protein involved in cell growth and fusion.
Stat3	1.60341	0.00151117	STAT3; cytokine-activated transcription factor in gliosis, survival, and neuroplasticity.
Pi4k2a	0.810126	0.00151117	PI4K2A; Golgi-associated phosphatidylinositol 4-kinase producing PI4P for membrane trafficking.
Cdh22	1.72691	0.00151313	Cadherin-22; brain-expressed adhesion molecule guiding axons and synaptic connections.
Dok5	1.63409	0.0015684	DOK5; adaptor that links receptor tyrosine kinases (Trk, RET) to downstream signaling in neurons.
Slco5a1	1.55743	0.0015726	SLCO5A1; organic anion transporter mediating uptake of amphipathic molecules.
Crtac1	0.890374	0.00157265	CRTAC1; cartilage acidic protein involved in cell adhesion and ECM organization.
Lrp8	0.976983	0.00166633	LRP8 (ApoER2); Reelin pathway receptor required for neuronal migration and synaptic plasticity.
Blnk	2.80058	0.00167074	BLNK; adaptor scaffold for B-cell receptor pathways, with minor neural expression.
Ubn1	0.688401	0.00173262	UBN1; chromatin-binding factor involved in DNA repair and gene regulation.
Cited2	1.54947	0.00194402	Transcriptional co-activator that modulates hypoxia, TGF-β, and retinoic-acid responses; integrates developm. and stress signaling.
Tpm4	1.26473	0.00198281	Actin-binding tropomyosin that stabilizes microfilaments and influences contractility and motility.
Arc	2.55694	0.00206664	Immediate-early cytoskeletal effector of synaptic plasticity and memory consolidation; regulates spine structure.
Ptprf	1.21026	0.00206948	Adhesion-dependent receptor phosphatase organizing axon guidance and synapse formation.
Pde6b	2.85784	0.00206948	cGMP-specific phosphodiesterase of phototransduction; hydrolyzes cGMP to terminate visual signaling.
Ppl	2.19651	0.00218306	Plakin-family cytolinker that anchors intermediate filaments to membranes and cell junctions.
Cdh4	1.40421	0.00219518	Classical cadherin guiding axon targeting and dendritic patterning during neural development.
Samd11	2.15087	0.00231365	SAM-domain transcriptional modulator with roles in retinal/neuronal differentiation.
Egr1	1.98155	0.00234974	Immediate-early zinc-finger transcription factor driving neuronal activation and growth programs.
Ptprn	0.923059	0.00238637	Dense-core vesicle protein regulating hormone/neurotransmitter secretion and vesicle maturation.
Ptpn5	0.938719	0.00242022	Postsynaptic tyrosine phosphatase (STEP) that dephosphorylates ERK/NMDAR substrates to restrain synaptic plasticity.
Efr3b	0.866879	0.00255658	Plasma-membrane scaffold that anchors PI4-kinase complexes to sustain phosphoinositide turnover for receptor + vesicle signaling.
Tpbg	2.18644	0.00289735	Cell-surface glycoprotein modulating Wnt/cytoskeletal pathways; promotes migration and epithelial–mesenchymal transitions.
Rbms1	1.34705	0.00295254	RNA/DNA-binding protein controlling mRNA stability, replication initiation, and transcription of growth/stress genes.
Ifrd1	1.03129	0.00306052	Transcriptional modulator of differentiation and regeneration; links chromatin remodeling to injury responses.
Mir22hg	1.1061	0.00311558	Long non-coding RNA producing miR-22 and acting in transcriptional regulation of stress and inflammatory genes.
Ttyh3	1.1391	0.00315647	Ca²⁺-activated anion channel influencing cell volume regulation and neuronal excitability.
Igfbp3	1.57602	0.00323791	Secreted IGF carrier that prolongs IGF half-life and shapes pro-/anti-apoptotic signaling.
Zmiz1	1.40133	0.00422819	PIAS-like co-activator that potentiates androgen/Notch pathways and developmental transcription programs.
Zfp36	2.56966	0.00434871	ARE-binding mRNA-destabilizing factor (TTP) that curtails cytokine expression and inflammatory signaling.
Cop1	0.862584	0.00449329	E3 ubiquitin ligase that targets transcription factors (e.g., c-Jun) for degradation; coordinates circadian and stress responses.
Zfp804a	1.24802	0.00449329	Neurodevelopmental transcriptional regulator implicated in synaptic function and connectivity.
Slc6a17	1.07856	0.00449948	Vesicular neutral–amino-acid transporter in glutamatergic neurons; modulates excitatory transmission.
Unc13b	1.27218	0.00459927	Vesicle-priming factor essential for Ca²⁺-triggered neurotransmitter release.
6430548M08Rik	1.14307	0.00470416	Predicted non-coding RIKEN locus; minimal functional annotation.
Etv3	0.964123	0.00475214	ETS-family repressor shaping interferon/MAPK-driven transcriptional programs.
Grm8	1.49957	0.00497322	Presynaptic inhibitory metabotropic glutamate receptor that suppresses neurotransmitter release.
Acsl6	0.623035	0.0051005	Long-chain acyl-CoA synthetase activating fatty acids for lipid synthesis and β-oxidation.
Zdhhc18	0.762066	0.00521985	Palmitoyltransferase that S-acylates synaptic proteins to control membrane trafficking.
Klf10	1.34391	0.00521985	TGF-β-inducible Krüppel-like transcription factor linking stress to growth arrest/differentiation.
Pear1	3.00775	0.00528221	Platelet/endothelial receptor regulating adhesion signaling and hemostasis.
Lingo1	1.16203	0.00539907	Leucine-rich repeat/Ig-like receptor promoting neurite outgrowth and myelination.
Ptpn3	1.04921	0.00544901	Cytoplasmic protein tyrosine phosphatase acting at postsynaptic sites to tune receptor signaling.
Col5a1	0.947852	0.00563757	Fibrillar collagen of extracellular matrix contributing to axonal ensheathment and tissue architecture.
Cdyl2	1.3797	0.0057476	Chromatin reader associated with transcriptional repression during differentiation.
Fstl4	1.27614	0.00602809	Secreted ECM glycoprotein that modulates synaptogenesis and TGF-β signaling.
Ankrd50	1.24666	0.00614438	Ankyrin-repeat adaptor linking membranes to cytoskeleton and protein trafficking pathways.
Map2k3	0.897905	0.00670549	MAP2K3 (MKK3), activator of p38 MAPK that mediates inflammatory and stress responses.
Rem2	1.34786	0.00672896	RGK-family small GTPase regulating dendritic morphology and inhibiting voltage-gated Ca²⁺ channels.
Pim1	2.60623	0.00694544	Ser/Thr kinase promoting survival and metabolic activity downstream of cytokines.
Lpgat1	0.868478	0.00711983	Lysophosphatidylglycerol acyltransferase remodeling mitochondrial/membrane phospholipids.
Tcaf1	0.652172	0.00741955	TRPM8-channel–associated factor controlling channel trafficking and Ca²⁺ entry.
Skil	0.952179	0.00743292	SKI-like transcriptional corepressor; SMAD-interacting antagonist of TGF-β signaling.
4931440P22Rik	1.71736	0.00746737	Predicted RIKEN non-coding locus; limited annotation.
Gpr153	1.95315	0.00746894	Orphan class-A GPCR expressed in brain; candidate modulator of mood/cognition circuits.
Plcd1	1.07955	0.00747287	Phospholipase Cδ that generates IP₃ and DAG to mobilize Ca²⁺ signals.
1700025G04Rik	0.895056	0.00758612	Predicted RIKEN transcript; minimal annotation.
Camk1	0.835417	0.0079416	Ca²⁺/calmodulin-dependent protein kinase linking Ca²⁺ influx to gene expression and neurite outgrowth.
Rgs2	1.57132	0.00798226	G-protein signaling attenuator (RGS) that shortens Gq/Gs responses in neurons and cardiovascular tissues.
Gxylt2	1.38299	0.00817089	Glucoside xylosyltransferase initiating O-glucosylation of EGF repeats (e.g., Notch) to tune receptor function.
Col27a1	3.23317	0.00829532	Fibrillar collagen forming extracellular matrix of cartilage and develop neural tissue; provides tensile strength and structural support.
Spp1	3.07609	0.00856042	Secreted phosphoprotein that promotes adhesion, migration, and macrophage activation during remodeling and inflammation.
Amotl1	1.69567	0.00865152	Adaptor in Hippo and junctional pathways controlling polarity, proliferation, and cell migration.
Spry2	1.63886	0.00865571	MAPK-pathway inhibitor that restrains RTK signaling to fine-tune neuronal differentiation.
Atf3	4.28335	0.0087106	Immediate-early transcription factor activated by stress and cAMP that coordinates repair and apoptosis programs.
Srrm4	1.18187	0.00931915	Neuronal SR-splicing regulator driving inclusion of brain-specific exons to maintain excitability and identity.
Sox9	1.68319	0.00933112	SOX-family transcription factor orchestrating neural crest and glial differentiation programs.
Penk	2.10372	0.00935364	Proenkephalin neuropeptide precursor processed to Met- and Leu-enkephalins for modulation of pain and reward circuits.
Gm10033	1.30016	0.00951415	Predicted non-coding gene with limited annotation.
Tspan9	1.51634	0.00954693	Tetraspanin-9; membrane scaffold assembling adhesion and signaling complexes at cell–cell junctions.
Lrrtm3	1.0164	0.00975857	Leucine-rich repeat synaptic adhesion protein promoting excitatory-synapse maturation and activity-dependent plasticity.
Cflar	1.35714	0.00991659	Apoptosis and NF-κB regulator linking death-receptor and survival signaling.
Frrs1	1.78263	0.0106346	AMPA-receptor auxiliary subunit shaping receptor trafficking and synaptic transmission efficacy.
Fgl2	2.94488	0.0113888	Secreted fibrinogen-like glycoprotein that suppresses inflammation and supports tissue repair.
Fat3	1.0508	0.0113888	Large cadherin-superfamily adhesion receptor governing axon targeting and tissue morphogenesis.
Chrna1	2.55131	0.0117368	Ligand-gated acetylcholine-receptor α-subunit mediating fast synaptic transmission.
Nedd9	1.55656	0.0117368	Adaptor scaffolding protein coupling integrins and receptor tyrosine kinases to actin remodeling.
Enox1	0.93463	0.0117368	Plasma-membrane NADH oxidase controlling extracellular redox state and growth signaling.
Acvr1c	1.99977	0.0122856	Activin-receptor-like kinase transmitting TGF-β–family morphogen signals during development.
Dlgap3	0.884549	0.012419	MAGUK scaffold organizing NMDA-receptor complexes and regulating synaptic strength.
Cux1	0.948715	0.0130057	CUT-homeobox transcription factor directing dendritic patterning and cortical layer specification.
Mbd2	0.848747	0.0133624	Methyl-CpG-binding repressor linking DNA methylation to chromatin condensation.
Hbegf	1.51517	0.0134746	Heparin-binding EGF-like mitogen that promotes proliferation, wound healing, and neurogenesis.
Rgs9	1.03205	0.0136678	GTPase-activating protein that accelerates G-protein deactivation in phototransduction and striatal GPCR signaling.
Ptgs2os	1.71486	0.0139387	Antisense long non-coding RNA controlling Ptgs2/COX-2 transcription in inflammation.
Tm4sf1	2.79759	0.0139501	Tetraspanin-family membrane protein facilitating endothelial migration and proliferation.
Acsl5	0.7263	0.0140501	Mitochondrial acyl-CoA synthetase catalyzing fatty-acid activation for β-oxidation and membrane synthesis.
Tspan5	0.624565	0.0140637	Tetraspanin scaffolding protein organizing exosomes and adhesion complexes.
Pdzd2	1.25574	0.0140637	PDZ-domain scaffold localizing signaling proteins at synapses and tight junctions.
Myo3b	1.90763	0.0142123	Actin-based myosin motor involved in protrusion dynamics and intracellular transport.
Plpbp	0.668178	0.0152625	Vitamin B₆-binding enzyme required for pyridoxal-phosphate metabolism and neurotransmitter synthesis.
Nr4a2	1.02003	0.0154943	Activity-dependent orphan nuclear receptor that controls metabolic, apoptotic, and dopaminergic pathways.
Grm7	0.997659	0.0158065	Presynaptic inhibitory metabotropic glutamate receptor suppressing neurotransmitter release probability.
Efemp2	1.15491	0.0164991	Extracellular glycoprotein promoting angiogenesis and neuronal adhesion.
Pcdh15	1.4907	0.0167261	Cadherin-superfamily adhesion molecule mediating mechanotransduction in sensory hair cells.
Pcsk1	1.52579	0.0167261	Secretory prohormone convertase that processes peptide precursors into active hormones and neuropeptides.
Myh9	0.92202	0.0167261	Non-muscle myosin heavy chain driving contractile force for motility and cytokinesis.
Ago2	0.978125	0.0167546	Catalytic Argonaute of RISC executing microRNA-guided gene silencing.
Fbln2	1.3184	0.0169307	Elastic-fiber-binding extracellular glycoprotein maintaining structural integrity and elasticity.
Gal	3.73846	0.0169307	Neuropeptide modulating feeding, stress, and nociceptive signaling.
Hivep3	1.16932	0.0173658	Zinc-finger transcription factor coupling NF-κB and developmental gene regulation.
Spred2	0.966789	0.0177699	MAPK-inhibitory scaffold restraining ERK signaling to coordinate axon guidance and synaptic development.
Csf1	1.15051	0.0179227	Cytokine regulating macrophage and microglial proliferation, differentiation, and survival.
Pfkp	0.840366	0.0188439	Phosphofructokinase-platelet isoform catalyzing a key step of glycolysis and metabolic reprogramming.
Sulf2	0.839734	0.0194951	Endosulfatase that edits heparan-sulfate chains to adjust morphogen and growth-factor signaling.
Kcnk10	0.867855	0.0198704	Two-pore domain potassium channel providing leak currents that stabilize resting membrane potential.
Fmnl1	0.899743	0.0207289	Actin-nucleating formin promoting protrusive activity and migration in developing tissues.
Cacna1g	1.1155	0.0207978	Low-threshold T-type calcium channel enabling rhythmic burst firing and pacemaker activity.
Adpgk	0.823258	0.0208938	ADP-dependent glucokinase coupling carbohydrate flux to cellular energy homeostasis.
Kcnf1	1.11132	0.0209389	Voltage-gated potassium-channel modulatory subunit altering current amplitude and kinetics.
Hsph1	0.885225	0.0217691	Heat-shock 105 kDa protein; chaperone stabilizing unfolded proteins under heat or oxidative stress and regulating proteostasis.
Tulp4	0.791536	0.0225502	Tubby-like protein 4; membrane-associated adaptor regulating vesicle trafficking and photoreceptor function.
Prokr2	1.21809	0.0226494	Prokineticin receptor 2; GPCR coordinating circadian rhythms, olfactory development, and neuroendocrine signaling.
Ppm1h	0.912299	0.0230557	Protein phosphatase 1H; Ser/Thr phosphatase regulating cytoskeletal organization and stress-response signaling.
Slc2a13	0.627601	0.02317	Solute carrier 2A13; glucose/fructose transporter modulating neuronal and olfactory nutrient uptake.
Dpy19l3	0.794257	0.0238584	DPY19-like 3; C-mannosyltransferase modifying tryptophan residues on secreted proteins to stabilize folding.
Smad3	0.732602	0.0243547	SMAD3; transcriptional effector of TGF-β signaling driving fibrosis, differentiation, and synaptic plasticity.
Bach1	1.69063	0.0249942	BTB/Cap’n-collar bZIP transcription factor coordinating oxidative-stress response and heme metabolism.
Syndig1l	1.8646	0.0252643	SynDIG1-like membrane protein; postsynaptic factor influencing AMPA-receptor clustering.
Srgap1	0.849829	0.0256275	Slit-Robo GTPase-activating protein 1; cytoskeletal regulator of axon guidance and neuronal migration.
Ptp4a2	0.529846	0.0258871	Protein tyrosine phosphatase 4A2; prenylated dual-specificity phosphatase promoting proliferation and motility.
Col5a3	1.2345	0.0258986	Collagen V α3 chain; ECM component contributing to connective-tissue organization and synaptic stability.
Lrrk2	0.996981	0.0258986	Leucine-rich repeat kinase 2; multifunctional kinase/GTPase implicated in synaptic signaling and Parkinson’s disease.
Acvr1	0.763538	0.0260857	Activin-receptor 1; type I TGF-β superfamily receptor mediating BMP/activin morphogen gradients.
Spaca6	0.762937	0.0261623	Sperm acrosome membrane-associated protein 6; gamete-fusion factor with limited somatic expression.
Mir132	3.24815	0.0261713	MicroRNA 132 host transcript; activity-induced lncRNA enhancing neurite outgrowth and synaptic plasticity.
Rnh1	0.937257	0.0264999	Ribonuclease inhibitor 1; leucine-rich cytosolic protein binding RNases and modulating redox homeostasis.
Scg2	1.55971	0.0266329	Secretogranin 2; neuroendocrine secretory granule protein processed into peptides that regulate neurotransmission.
Igsf3	0.69105	0.0266329	Immunoglobulin superfamily member 3; adhesion molecule supporting synapse formation and neuronal connectivity.
Slc41a2	0.789512	0.0266666	Solute carrier 41A2; Mg²⁺ transporter balancing cellular magnesium homeostasis.
Nrn1	0.993356	0.0267121	Neuritin-1; GPI-anchored neurotrophic factor promoting neurite extension and synaptic maturation.
Mapk12	1.25512	0.0270882	MAP kinase 12 (p38γ); stress-activated kinase regulating cytoskeletal remodeling and metabolism.
Adra2c	1.07957	0.0274751	Adrenergic receptor α2C; inhibitory GPCR modulating norepinephrine release and vascular tone.
Ssbp3	0.746185	0.027928	Single-stranded DNA-binding protein 3; mitochondrial DNA maintenance and replication factor.
Myo9b	0.857859	0.0286792	Myosin IXb; motor protein with RhoGAP activity coordinating actin organization and vesicle transport.
Etv3l	2.68866	0.0291593	ETS-family transcription factor; paralog of Etv3 mediating MAPK-responsive gene repression.
Egr2	2.26625	0.0293273	Immediate-early transcription factor induced by synaptic activity; regulates neurodevelopment and regeneration.
Myc	1.24878	0.0293535	Proto-oncogene c-Myc; master transcriptional activator controlling growth, metabolism, and differentiation.
Rtn4rl2	0.930538	0.0297097	Reticulon-4 receptor-like 2; cell-surface receptor mediating neurite-growth inhibition and synaptic remodeling.
Slc35f6	0.524257	0.0297097	Solute carrier 35F6; nucleotide-sugar transporter with roles in protein glycosylation.
Gsg1l	0.980377	0.0297097	Glutamate-gated subunit-like protein (GSG1L); AMPA-receptor auxiliary subunit adjusting kinetics and desensitization.
Pak3	0.767993	0.0298431	p21-activated kinase 3; Ser/Thr kinase linking Rho GTPases to cytoskeletal dynamics and dendritic spine formation.
S100a10	1.81941	0.0300755	Annexin A10-like S100A10; Ca²⁺-binding protein anchoring ion channels and receptors to membranes.
Arl4d	1.85446	0.0307332	ADP-ribosylation-like protein 4D; small GTPase influencing actin dynamics and trafficking.
Trh	6.07276	0.0311477	Thyrotropin-releasing hormone; hypothalamic neuropeptide controlling pituitary thyroid stimulation.
Egr4	1.97789	0.0315239	Immediate-early transcription factor driving neuronal excitation-induced gene programs.
Pappa	3.00316	0.0316721	Pregnancy-associated plasma protein A; secreted metalloprotease cleaving IGF-binding proteins to regulate growth signaling.
Slco3a1	0.742218	0.0317667	Organic anion transporter 3A1; membrane carrier for bile acids and xenobiotics in brain and liver.
Tvp23a	1.11913	0.032189	Trans-Golgi vesicle protein 23A; cargo-sorting factor in retrograde transport and Golgi homeostasis.
Micall1	1.03602	0.0331692	MICALL1; Rab13-effector controlling endocytic recycling and actin reorganization.
Pde4dip	0.575698	0.0332415	Phosphodiesterase 4D-interacting protein (Myomegalin); centrosomal scaffold anchoring cAMP/PKA signaling.
Shisal1	0.959272	0.0332857	Shisa-like 1; transmembrane modulator of AMPA-receptor trafficking in hippocampal neurons.
Prlr	1.63929	0.0335261	Prolactin receptor; cytokine receptor activating JAK-STAT signaling in lactation and neuroendocrine functions.
Errfi1	0.897293	0.0338558	EGFR-feedback inhibitor 1 (Mig6); cytoplasmic suppressor of ERBB signaling balancing growth and survival.
Nek6	0.757072	0.0340759	NEK6 kinase; cell-cycle Ser/Thr kinase regulating spindle assembly and mitotic progression.
Dpysl3	1.11496	0.0344253	Collapsin-response mediator protein 3; microtubule-binding phosphoprotein directing axon guidance and branching.
Bdnf	1.65682	0.034512	Brain-derived neurotrophic factor; neurotrophin promoting neuronal survival, differentiation, and synaptic plasticity.
Kcnd3	0.613674	0.0352035	Kv4.3 voltage-gated K⁺ channel α-subunit; mediates A-type currents shaping neuronal excitability.
Ccdc9b	1.20536	0.0356872	Coiled-coil domain-containing protein 9B; centrosomal protein of uncertain function, predicted in ciliogenesis.
R3hdm2	0.63005	0.0357252	R3H-domain-containing protein 2; RNA/DNA-binding factor possibly regulating mRNA stability.
Nrxn3	0.903344	0.0358276	Neurexin 3; presynaptic adhesion molecule, forms complexes that organize neurotransm. release and determine synapt. specificity.
Mapk11	0.860055	0.0360486	MAP kinase 11 (p38β); stress-activated kinase regulating inflammation, cytoskeletal dynamics, and neuronal survival.
Ndc1	0.912086	0.0367386	Nuclear-pore-complex protein NDC1; integral membrane component required for nuclear pore assembly and envelope integrity.
Gm6206	0.833068	0.036825	Predicted locus Gm6206; uncharacterized transcript, possibly non-coding with low expression in brain.
Rwdd3	0.85996	0.0377573	RWDD domain protein 3; small redox-regulated adaptor modulating hypoxia-inducible signaling.
A330009N23Rik	1.25279	0.037892	Predicted non-coding transcript A330009N23Rik; poorly characterized gene with potential regulatory RNA function.
Il33	1.36652	0.0384758	Interleukin-33; alarmin cytokine released upon cellular stress, activating type 2 immune and glial responses.
Jsrp1	1.909	0.0387527	Junctional SR protein 1; skeletal-muscle Ca²⁺-handling component linking excitation and contraction.
Plk3	0.953119	0.0394599	Polo-like kinase 3; stress-responsive Ser/Thr kinase regulating G₂/M checkpoint and DNA-damage repair.
Jup	1.1056	0.0394847	Junction plakoglobin; armadillo-family adherens-junction protein linking cadherins to intermediate filaments.
Rrad	4.65337	0.0404396	RRAD GTPase; small Ras-related protein modulating cardiac metabolism and Ca²⁺-channel trafficking.
Klhl40	1.52868	0.0404396	Kelch-like 40; actin-binding regulator of myofibril assembly and muscle integrity.
Rab15	0.856228	0.0404516	Rab15 GTPase; controls early endosomal recycling in neurons and epithelia.
Slc38a1	0.705076	0.0404516	Solute carrier 38A1; system A glutamine transporter supplying amino acids for neurotransmission and metabolism.
Rbpj	1.04677	0.0405865	Recombination-signal-binding protein Jκ; Notch-pathway transcriptional effector maintaining neural-progenitor identity.
Noct	0.641946	0.0410541	Nocturnin; circadian deadenylase coupling metabolic gene expression to light–dark cycles.
Pvr	1.00619	0.0422225	Poliovirus-receptor–related protein (Pvr); adhesion and signaling molecule influencing immune recognition and migration.
Ppm1l	1.18355	0.0425312	Protein phosphatase 1L; serine/threonine phosphatase modulating lipid metabolism and synaptic signaling.
Arpp21	0.73754	0.0425312	cAMP-regulated phosphoprotein 21; activity-induced cytoskeletal protein stabilizing dendritic spines.
Slc27a3	0.950632	0.0428169	Solute carrier 27A3; fatty-acid transporter activating long-chain lipids for metabolism and signaling.
Midn	1.30231	0.0431255	Midnolin; nucleolar factor coupling oxidative stress to transcriptional and protein-quality control.
Arhgef7	0.683883	0.0432449	Rho GEF 7 (β-PIX); guanine-nucleotide-exchange factor controlling Rac/Cdc42 signaling and synapse morphology.
Apba2	0.61858	0.0434357	Adaptor protein 2 μ-subunit; clathrin-mediated endocytosis component required for vesicle cargo selection.
D030047H15Rik	1.17758	0.0447052	predicted long non-coding RNA gene; low-expression RIKEN cDNA in neuronal tissues, possibly modulating synaptic or signaling genes.
Sstr3	1.26462	0.0455692	Somatostatin receptor 3; GPCR that inhibits adenylyl cyclase and modulates neuroendocrine secretion.
Fam210b	1.0106	0.045936	Family with sequence similarity 210 member B; mitochondrial inner-membrane protein involved in translation or respiration.
Junb	1.90514	0.045936	Jun B; immediate-early AP-1 transcription factor orchestrating cell-growth and stress responses.
Wnt10a	1.46796	0.0462557	Wnt10a; secreted Wnt-family ligand activating β-catenin-dependent developmental pathways.
Angptl4	2.35267	0.0462939	Angiopoietin-like 4; secreted glycoprotein regulating angiogenesis, lipid metabolism, and vascular permeability.
Sertm1	0.951283	0.0464179	SERTM1 (serine-rich transmembrane protein 1); poorly characterized membrane protein enriched in neurons.
Pde2a	1.049	0.0485582	Phosphodiesterase 2A; cAMP/cGMP-hydrolyzing enzyme integrating nitric-oxide and adrenergic signaling.
Svil	1.40162	0.0485582	Supervillin; actin- and myosin-binding scaffold organizing focal adhesions and controlling cell motility.
Downregulated
Plk5	-2.82616	8.29562e-11	Polo-like kinase 5; stress-activated serine/threonine kinase involved in DNA-damage response and neuronal differentiation.
Chn1	-1.18875	1.22342e-08	Chimerin 1; Rac GTPase-activating protein regulating axon guidance and dendritic spine remodeling.
Cyp7b1	-2.09213	2.63988e-07	Cytochrome P450 7B1; oxysterol hydroxylase controlling neurosteroid and bile acid metabolism.
Mmd2	-1.34348	9.08678e-07	Monocyte to macrophage differentiation factor 2; endoplasmic reticulum–associated protein influencing immune cell differentiation.
Stxbp6	-1.41299	2.3418e-06	Syntaxin-binding protein 6; SNARE complex regulator facilitating vesicle docking and neurotransmitter release.
Crlf1	-1.90503	3.30872e-06	Cytokine receptor-like factor 1; co-receptor involved in neurotrophic and cytokine-mediated survival signaling.
Slc26a10	-1.91569	5.95679e-06	Solute carrier family 26 member 10; putative anion transporter maintaining epithelial and neuronal ion balance.
Aifm3	-1.24846	7.44841e-06	Apoptosis-inducing factor, mitochondrion-associated 3; mitochondrial oxidoreductase promoting caspase-independent cell death.
Aldh2	-1.18408	9.38264e-06	Aldehyde dehydrogenase 2; mitochondrial enzyme detoxifying acetaldehyde and reactive lipid aldehydes.
Lct	-1.68624	1.1406e-05	Lactase-phlorizin hydrolase; intestinal β-glycosidase hydrolyzing lactose and dietary glucosides.
Ppp3ca	-0.82545	1.36908e-05	Calcineurin catalytic subunit alpha; calcium-dependent phosphatase regulating synaptic plasticity and gene transcription.
Gabrd	-1.76458	1.49297e-05	Gamma-aminobutyric acid receptor subunit delta; GABA-A receptor component mediating tonic neuronal inhibition.
Cys1	-1.81741	1.7291e-05	Cystin 1; ciliary protein essential for renal tubule morphogenesis and epithelial organization.
Rab26	-1.43435	1.7291e-05	Ras-related protein Rab-26; small GTPase controlling regulated exocytosis in secretory cells.
Hap1	-1.25267	1.99732e-05	Huntingtin-associated protein 1; scaffolding protein organizing cytoskeleton and vesicle transport in neurons.
Lin7b	-1.29433	2.48195e-05	Lin-7 homolog B; synaptic scaffolding component stabilizing polarity and receptor localization.
Wasf1	-1.11785	2.48195e-05	WASP family member 1; actin polymerization regulator promoting lamellipodia formation and cell motility.
C1qtnf12	-1.30086	4.08318e-05	C1q and TNF-related protein 12; adipokine modulating insulin sensitivity and lipid metabolism.
Rasal1	-1.11077	4.55267e-05	RAS protein activator-like 1; Ras GTPase-activating protein suppressing MAPK signaling and proliferation.
Il20rb	-1.93974	4.65801e-05	Interleukin-20 receptor subunit beta; cytokine receptor subunit mediating tissue repair and epithelial defense.
Echdc2	-1.77174	5.3933e-05	Enoyl-CoA hydratase domain-containing 2; mitochondrial enzyme catalyzing fatty acid β-oxidation.
Abhd14b	-0.969333	7.1116e-05	Alpha/beta hydrolase domain-containing 14B; serine hydrolase acting in lipid and ester metabolism.
Sesn1	-0.888622	9.00674e-05	Sestrin 1; oxidative stress sensor activating autophagy and AMPK pathways.
Lgi3	-1.21515	9.88981e-05	Leucine-rich glioma-inactivated protein 3; secreted synaptic adhesion protein stabilizing neuronal contacts.
Zbtb18	-1.22038	0.000155922	Zinc finger and BTB domain-containing protein 18; transcriptional repressor essential for cortical neuron differentiation.
Tmem191c	-1.16573	0.000164575	Transmembrane protein 191C; endoplasmic reticulum–localized protein of unknown function.
Cdc25b	-0.952547	0.000165064	Cell division cycle 25B; phosphatase activating cyclin-dependent kinases to initiate mitosis.
Lratd2	-1.62866	0.000165064	LRAT domain-containing protein 2; retinyl ester–related enzyme participating in lipid metabolism and signaling.
Crym	-1.0292	0.000200788	Mu-crystallin; thyroid-hormone-binding protein modulating metabolic rate and enzyme regulation.
Icam5	-0.94149	0.000227416	Intercellular adhesion molecule 5; neuronal cell-adhesion receptor mediating dendritic spine formation.
Pcdh20	-1.31892	0.000361387	Protocadherin 20; calcium-dependent adhesion molecule guiding synaptic specificity and circuit formation.
Arhgap12	-1.0714	0.000361387	Rho GTPase-activating protein 12; regulator of cytoskeletal reorganization and cell motility.
Add3	-1.01174	0.000361387	Gamma adducin; actin-capping protein stabilizing the membrane–cytoskeleton interface.
Kctd4	-1.40188	0.000401353	Potassium channel tetramerization domain-containing protein 4; channel adaptor modulating neuronal excitability.
Kcnip2	-1.29999	0.000433386	Kv channel-interacting protein 2; calcium-binding regulatory subunit modulating potassium channel activity.
Pcdh19	-1.32064	0.000443231	Protocadherin 19; adhesion receptor involved in neuronal recognition and X-linked epilepsy syndromes.
Car11	-1.04134	0.000445336	Carbonic anhydrase–related protein 11; catalytically inactive carbonic anhydrase family member influencing pH homeostasis.
Lmo3	-0.946929	0.000481796	LIM domain only protein 3; transcriptional co-regulator involved in neuronal differentiation and myogenesis.
6330420H09Rik	-2.24387	0.000518974	RIKEN cDNA 6330420H09 gene; predicted noncoding transcript expressed in brain tissue.
Cadps2	-1.04994	0.000539596	Calcium-dependent activator protein for secretion 2; vesicle priming factor essential for neuropeptide release.
Smpd2	-1.25695	0.000543695	Sphingomyelin phosphodiesterase 2; enzyme generating ceramide for membrane signaling and stress responses.
Septin4	-0.945601	0.000574289	Septin 4; GTP-binding cytoskeletal filament protein regulating cytokinesis, apoptosis, and synaptic vesicle trafficking.
Cd34	-1.63453	0.000807656	CD34 antigen; cell-surface sialomucin marking progenitors and mediating adhesion on endothelium.
Hlf	-1.2792	0.000807656	Hepatic leukemia factor; bZIP transcription factor coordinating circadian and metabolic gene programs.
Scn3b	-1.15957	0.000945736	Sodium channel subunit beta-3; accessory subunit tuning voltage-gated Na⁺ channel gating and excitability.
Evc2	-1.00102	0.00100593	Ellis–van Creveld syndrome protein 2; ciliary Hedgehog-pathway component required for skeletal development.
Npy2r	-1.27611	0.0010406	Neuropeptide Y receptor Y2; Gi-coupled receptor mediating presynaptic inhibition and appetite control.
Magee2	-1.86251	0.00119091	MAGE family member E2; testis-enriched protein with limited characterized neural function.
Egfem1	-1.34069	0.00124345	EGF-like and EMI domain–containing protein 1; adhesion-related transmembrane glycoprotein in development.
Per3	-1.36633	0.00125285	Period circadian regulator 3; core clock protein maintaining daily transcriptional rhythms.
Cxcl12	-1.74971	0.00136876	Chemokine (C–X–C motif) ligand 12; chemokine guiding axon growth, neuronal migration, and vascular development.
Cpne6	-1.11878	0.00136876	Copine 6; calcium-dependent phospholipid-binding protein regulating dendritic plasticity and synaptic remodeling.
Pik3ip1	-1.03662	0.0013912	Phosphoinositide-3-kinase interacting protein 1; membrane-assoc. inhibitor of PI3K–Akt signaling modulating growth and differentiation.
Zcchc18	-0.947844	0.00144759	Zinc finger CCHC-type containing 18; RNA-binding zinc-finger protein involved in transcript stabilization and nuclear RNA processing.
Ogn	-2.47778	0.00145188	Osteoglycin; small leucine-rich proteoglycan that organizes collagen fibrils and contributes to extracellular matrix structure.
Faah	-0.959824	0.00156233	Fatty acid amide hydrolase; enzyme hydrolyzing endocannabinoids and lipid amides to terminate signaling in neural tissues.
F730043M19Rik	-1.07777	0.00156233	RIKEN cDNA F730043M19 gene; predicted noncoding RNA transcript expressed predominantly in the nervous system.
Gpr12	-1.61221	0.00158493	G-protein coupled receptor 12; orphan GPCR that activates cAMP signaling to promote neurite outgrowth and synaptic connectivity.
Raver2	-1.17599	0.00182715	Raver-related protein 2; RNA-binding protein regulating alternative splicing and cytoskeletal mRNA localization.
Tspan33	-0.960944	0.00182715	Tetraspanin 33; integral membrane scaffold protein that coordinates erythroid differentiation and membrane organization.
Ltk	-0.938121	0.00188746	Leukocyte receptor tyrosine kinase; receptor tyrosine kinase mediating neurite extension, glial differentiation, and axon guidance.
Gm12216	-1.46639	0.00188746	Predicted gene Gm12216; uncharacterized noncoding transcript with high neuronal expression.
Abcc8	-1.29341	0.00190911	ATP-binding cassette subfamily C member 8; KATP channel regulatory subunit controlling insulin secretion and neuronal excitability.
Shroom2	-1.01804	0.00191038	Shroom family member 2; actin-binding scaffold directing epithelial polarity, morphogenesis, and cytoskeletal structure.
Klhl5	-0.827316	0.00207975	Kelch-like family member 5; cytoskeletal adaptor involved in protein complex formation and neurite development.
4933412O06Rik	-1.86306	0.0021847	RIKEN cDNA 4933412O06 gene; predicted long noncoding RNA expressed in brain.
Lrrn1	-1.38762	0.00218755	Leucine-rich repeat neuronal protein 1; adhesion molecule promoting synaptic specificity and neurite guidance.
Macrod1	-1.39712	0.00229064	Macro domain containing 1; ADP-ribosyl hydrolase that reverses protein mono-ADP-ribosylation in transcriptional regulation.
Spon1	-0.841262	0.00230426	Spondin 1; extracellular matrix protein promoting axonal growth, adhesion, and vascular organization.
Epor	-1.3354	0.00231365	Erythropoietin receptor; cytokine receptor mediating erythropoiesis and neuroprotection.
Cadm2	-0.69714	0.00259291	Cell adhesion molecule 2; immunoglobulin-like adhesion molecule organizing synaptic junctions.
Izumo4	-1.09407	0.0026044	IZUMO family member 4; membrane glycoprotein possibly mediating gamete or neuronal membrane fusion.
Sphkap	-0.892795	0.0033265	Sphingosine kinase type 1-associated protein; scaffold tethering PKA to sphingolipid-rich membranes and regulating lipid signaling.
Rskr	-1.35207	0.00338361	RSK-related kinase; serine/threonine kinase acting downstream of MAPK pathways in stress responses.
Itm2c	-1.23317	0.00343252	Integral membrane protein 2C; amyloid precursor–like protein modulating synaptic plasticity and cognitive processes.
Zeb2	-0.875647	0.00349166	Zinc finger E-box binding homeobox 2; transcription factor driving neural differentiation and epithelial–mesenchymal transition.
Pnck	-0.986131	0.00353225	Pregnancy-upregulated nonubiquitous calmodulin kinase; Ca²⁺/calmodulin-dependent kinase controlling receptor trafficking.
Phf1	-0.902004	0.00356316	PHD finger protein 1; chromatin reader recognizing methylated histones to regulate gene transcription.
Tmem131l	-0.793587	0.00359414	Transmembrane protein 131-like; endoplasmic reticulum factor promoting collagen secretion and vesicle transport.
Gm35339	-1.34305	0.00359414	Predicted gene Gm35339; long noncoding RNA transcript expressed in neurons.
Bhlhe22	-1.0176	0.00384895	Basic helix-loop-helix family member e22; transcriptional repressor specifying cortical neuron identity.
Slc17a5	-0.95926	0.00402178	Sialin; lysosomal transporter exporting sialic acid to prevent accumulation in storage disorders.
Otof	-1.2483	0.00443187	Otoferlin; calcium-sensor mediating synaptic vesicle fusion and neurotransmitter release in auditory hair cells.
Calb1	-1.28799	0.00453105	Calbindin 1; calcium-binding buffer maintaining neuronal calcium homeostasis and excitability.
Cdh8	-0.760478	0.00474825	Cadherin 8; classical cadherin controlling dendritic patterning and synapse formation.
Ntf3	-2.12142	0.00485318	Neurotrophin 3; growth factor promoting survival and differentiation of neurons.
Gpr155	-0.841479	0.00497322	G-protein coupled receptor 155; orphan GPCR influencing intracellular trafficking and neuronal signaling.
Itpka	-1.02592	0.00497322	Inositol-trisphosphate 3-kinase A; enzyme generating IP₄ to regulate calcium release and signaling.
Prdm8	-1.3413	0.00501247	PR domain zinc-finger protein 8; transcriptional regulator determining neuronal subtype identity.
Lefty1	-1.99759	0.00508399	Left–right determination factor 1; TGF-β superfamily morphogen required for embryonic asymmetry.
Galntl6	-0.88673	0.00508727	Polypeptide N-acetylgalactosaminyltransferase-like 6; glycosyltransferase initiating mucin-type O-glycosylation.
Aqp11	-1.18087	0.0051005	Aquaporin 11; intracellular water channel maintaining osmotic balance in kidney and brain.
Sowaha	-1.02057	0.0051005	SOWAHA family member; predicted secreted factor potentially regulating neuronal differentiation.
Lrrn3	-0.979844	0.0051005	Leucine-rich repeat neuronal protein 3; adhesion protein contributing to axonal targeting and synaptic stabilization.
Sec1	-1.40166	0.00565689	Syntaxin binding protein homolog 1 (Sec1); SNARE regulator essential for vesicle fusion and neurotransmitter release.
Sstr4	-1.1533	0.00567967	Somatostatin receptor 4; inhibitory GPCR suppressing neurotransmitter release and hormone secretion.
Gstm1	-1.27209	0.00568161	Glutathione S-transferase Mu 1; detoxification enzyme conjugating glutathione to electrophilic compounds.
Prtg	-1.25326	0.0061419	Protogenin; neural adhesion molecule mediating axon guidance and synaptogenesis.
Triqk	-1.55327	0.00625282	Triple Q motif-containing protein; transmembrane protein of uncertain function, possibly involved in trafficking.
Paqr7	-1.10454	0.00640761	Progestin and adipoQ receptor family member 7; membrane receptor implicated in steroid signaling and metabolism.
Chst12	-1.28483	0.00640761	Carbohydrate sulfotransferase 12; enzyme catalyzing sulfation of glycosaminoglycans, modifying extracellular matrix interactions.
4933431E20Rik	-0.94575	0.00694625	RIKEN cDNA 4933431E20 gene; predicted long noncoding RNA expressed primarily in nervous tissue.
Ramp2	-1.54196	0.00711983	Receptor activity-modifying protein 2; GPCR accessory protein modulating adrenomedullin receptor function and vascular signaling.
Rnf167	-0.57392	0.00746737	Ring finger protein 167; E3 ubiquitin ligase participating in endosomal sorting and lysosomal trafficking.
Nkain4	-1.55095	0.00746894	Na⁺/K⁺ ATPase interacting protein 4; transmembrane protein regulating ion pump activity and neuronal excitability.
Efnb3	-0.99304	0.00747287	Ephrin-B3; membrane-bound ligand guiding axon pathfinding and synaptic plasticity.
Extl1	-1.04395	0.00750152	Exostosin-like glycosyltransferase 1; enzyme catalyzing polymerization of heparan sulfate chains in development.
Mc4r	-1.72782	0.00751735	Melanocortin 4 receptor; GPCR controlling appetite and energy balance through hypothalamic signaling.
Igsf1	-1.613	0.00754148	Immunoglobulin superfamily member 1; pituitary-expressed membrane receptor involved in hormone regulation.
Gm5577	-1.16639	0.0079567	Predicted gene Gm5577; uncharacterized noncoding transcript expressed in brain.
Thsd7a	-0.668636	0.00798226	Thrombospondin type-1 domain-containing protein 7A; extracellular matrix component promoting synaptogenesis and angiogenesis.
Vwa3a	-1.56101	0.00802649	von Willebrand factor A domain-containing protein 3A; extracellular structural protein involved in cell adhesion.
Slc16a2	-0.906735	0.0080598	Monocarboxylate transporter 8; thyroid hormone transporter facilitating uptake into neurons.
Lrrtm4	-0.885124	0.00814219	Leucine-rich repeat transmembrane neuronal protein 4; postsynaptic adhesion molecule mediating synaptic organization.
Gabra5	-0.960535	0.00948254	GABA-A receptor subunit alpha-5; receptor subunit responsible for tonic inhibition and learning modulation.
Map7	-0.769273	0.00971857	Microtubule-associated protein 7; stabilizer of microtubules in neuronal axons and dendrites.
Cdk17	-0.664396	0.00975857	Cyclin-dependent kinase 17; neuron-enriched kinase regulating signaling and neurite extension.
Hspa2	-1.18445	0.00975857	Heat shock-related protein 2; molecular chaperone assisting spermatogenesis and cellular stress responses.
Rgs11	-0.821434	0.00991659	Regulator of G-protein signaling 11; GTPase-activating protein controlling GPCR signal duration in neurons.
Arhgef25	-1.03898	0.0102765	Rho guanine nucleotide exchange factor 25; activator of Rho GTPases involved in actin cytoskeleton remodeling.
Tmem145	-0.835512	0.0104154	Transmembrane protein 145; predicted integral membrane protein with unknown physiological role.
Ndst4	-1.04153	0.0108607	N-deacetylase/N-sulfotransferase 4; enzyme modifying heparan sulfate chains for developmental signaling.
Olfm1	-0.890461	0.0110602	Olfactomedin 1; secreted glycoprotein promoting neurite outgrowth and neuronal adhesion.
Maf1	-0.602987	0.0110602	Maf1 homolog; transcriptional repressor of RNA polymerase III involved in metabolic control.
Ivd	-0.719474	0.0113888	Isovaleryl-CoA dehydrogenase; mitochondrial enzyme catalyzing leucine degradation.
Aldoc	-1.18699	0.0113888	Fructose-bisphosphate aldolase C; glycolytic enzyme expressed in neurons and glial cells for energy metabolism.
C1ql2	-1.06986	0.0115518	C1q-like protein 2; synaptic organizer regulating inhibitory synapse formation and maintenance.
Rbm24	-0.987535	0.0118511	RNA-binding protein 24; regulator of mRNA splicing and muscle differentiation.
Abhd14a	-0.755246	0.01198	Alpha/beta hydrolase domain-containing 14A; enzyme involved in lipid metabolism and detoxification.
Ephx1	-1.36341	0.0126978	Epoxide hydrolase 1; detoxifying enzyme converting reactive epoxides into less toxic diols.
Ogfrl1	-0.698357	0.0128793	Opioid growth factor receptor-like 1; receptor modulating cell proliferation and tissue repair.
Nr1d2	-0.8748	0.0129138	Nuclear receptor subfamily 1 group D member 2 (REV-ERBβ); transcriptional repressor linking circadian rhythm and metabolism.
Pygo1	-0.936122	0.0130452	Pygopus homolog 1; transcriptional coactivator in Wnt/β-catenin signaling during development.
Cfap44	-1.01062	0.0135427	Cilia and flagella associated protein 44; axonemal component maintaining ciliary motility and structure.
Itga8	-0.883489	0.0136895	Integrin alpha-8; extracellular matrix receptor mediating cell adhesion and neuronal migration.
Mtfp1	-1.06426	0.0140501	Mitochondrial fission process protein 1; regulator of mitochondrial dynamics and energy homeostasis.
Caly	-1.22066	0.0140637	Calcyon neuron-specific vesicular protein; endosomal protein modulating dopamine receptor signaling.
Cldn10	-1.92663	0.0151665	Claudin 10; tight junction protein determining epithelial ion selectivity and permeability.
Ccdc85a	-0.995354	0.0152573	Coiled-coil domain-containing protein 85A; polarity factor influencing epithelial organization and cortical morphogenesis.
P3h3	-1.03174	0.0154389	Prolyl 3-hydroxylase 3; enzyme modifying collagen stability and extracellular matrix assembly.
Lcorl	-0.986903	0.0160356	Ligand-dependent nuclear receptor corepressor-like protein; transcriptional coregulator influencing differentiation.
Camkv	-0.899195	0.0161845	Camk-related kinase-like vesicle-associated protein; postsynaptic/vesicular scaffold regul. dendritic spine stability and Ca²⁺ signaling.
Arsb	-0.777283	0.016329	Arylsulfatase B; lysosomal enzyme degrading dermatan sulfate and chondroitin sulfate in ECM turnover.
Thbs3	-1.05935	0.0165074	Thrombospondin 3; matricellular glycoprotein promoting cell–matrix interactions, collagen fibrillogenesis, and synaptogenesis.
Cyth1	-0.850519	0.0167261	Cytosolic EFA6-like guanine nucleotide exchange factor 1; ARF-GEF coordinating actin remodeling and endocytosis.
Cpne4	-0.871611	0.0167546	Copine 4; Ca²⁺-dependent phospholipid-binding protein regulating membrane trafficking and neurite outgrowth.
Matn2	-0.957364	0.0169307	Matrilin 2; extracellular matrix adaptor organizing collagen networks and neuromuscular junction ECM.
Ypel1	-0.793768	0.0169307	Yippee-like protein 1; small coiled-coil adaptor involved in cell-cycle progression and cytoskeletal dynamics.
Pck2	-1.02351	0.0173824	Phosphoenolpyruvate carboxykinase 2 (mitoch.); gluconeogenic enzyme converting oxaloacetate to PEP, links TCA and glucose metabol.
Smarca2	-0.674037	0.0177545	SWI/SNF-related matrix-associated actin-dependent regulator of chromatin subfamily A; regulating neuronal gene expression.
Olfml2b	-1.11848	0.0189595	Olfactomedin-like protein 2B; secreted ECM glycoprotein influencing adhesion and neurite outgrowth.
Rapgef2	-0.807415	0.0193426	Rap guanine nucleotide exchange factor 2 (PDZ-GEF1); activates Rap1/Rap2 to control synaptic plasticity and neurite morphology.
Ptk2b	-0.583271	0.0203772	Protein tyrosine kinase 2 beta (PYK2/PTK2B); Ca²⁺-responsive focal-adhesion kinase mediating synaptic and immune signaling.
Kcnd2	-0.666061	0.0207634	Potassium voltage-gated channel subfamily D member 2 (Kv4.2); A-type K⁺ channel shaping dendritic excitability.
Pdcd4	-0.855368	0.0210901	Programmed cell death protein 4; translational repressor and tumor suppressor modulating AP-1 and mTOR signaling.
Rgs14	-0.783344	0.0211046	Regulator of G-protein signaling 14; integrator of Gαi/o and MAPK/Rap pathways in hippocampal learning.
Skida1	-1.04107	0.0220847	SKI/DACH domain-containing protein 1 (SKIDA1); chromatin-associated factor implicated in acetyl-lysine–dependent transcription ctr.
Orai3	-1.14545	0.022855	ORAI calcium release-activated calcium channel subunit 3; CRAC channel component mediating store-operated Ca²⁺ entry.
Asl	-0.752534	0.0229092	Argininosuccinate lyase; urea-cycle enzyme producing arginine and fumarate.
Gprasp2	-0.668943	0.0233256	G protein–coupled receptor–associated sorting protein 2; endosomal adaptor directing GPCR trafficking and downregulation.
Dbp	-1.30667	0.0234122	D-box binding protein (DBP); PAR-bZIP circadian transcription factor driving rhythmic gene expression.
Prxl2a	-1.0196	0.0234442	Peroxiredoxin-like 2A; antioxidant oxidoreductase protecting from reactive oxygen species.
Slc16a11	-0.778347	0.0236828	Solute carrier family 16 member 11; monocarboxylate transporter associated with lipid/glucose metabolism.
Neurod1	-0.766137	0.0240112	Neuronal differentiation 1; bHLH transcription factor promoting neuronal fate and survival.
Prrt1	-1.04701	0.0241727	Proline-rich transmembrane protein 1; AMPA-receptor–associated protein modulating synaptic transmission.
Rilpl1	-0.614557	0.0243122	RAB-interacting lysosomal protein-like 1; regulator of lysosome/cilium positioning and endosome dynamics.
Wdr45	-0.715591	0.0243122	WD repeat domain 45 (WIPI4); phosphoinositide effector essential for autophagy.
Pkp2	-0.980614	0.0245878	Plakophilin 2; desmosomal armadillo protein organizing cell–cell junctions and signaling.
Gstm6	-1.38659	0.0246246	Glutathione S-transferase Mu 6; phase-II detoxification enzyme conjugating electrophiles to glutathione.
Limd2	-0.997322	0.0256059	LIM domain–containing protein 2; small adaptor in integrin signaling and cell motility.
Capza2	-0.628807	0.0264999	F-actin capping protein alpha-2 subunit; caps barbed ends to regulate actin filament dynamics.
Pex3	-0.546425	0.0272349	Peroxisomal biogenesis factor 3; anchors PEX16/PEX19 to initiate peroxisome membrane formation.
Prkdc	-0.919137	0.0282655	DNA-dependent protein kinase catalytic subunit; double-strand break repair kinase (NHEJ).
Hapln1	-1.36007	0.0283396	Hyaluronan and proteoglycan link protein 1; stabilizes aggrecan–hyaluronan complexes in extracellular matrix.
Mapk3	-0.958627	0.0291148	Mitogen-activated protein kinase 3 (ERK1); central serine/threonine kinase in proliferation and plasticity.
Gucy1b1	-0.90452	0.0291593	Soluble guanylate cyclase subunit beta-1; NO receptor generating cGMP for vasodilatory/neural signaling.
Tctn3	-0.565986	0.0291593	Tectonic family member 3; ciliary transition-zone protein required for Hedgehog signaling.
Stk26	-1.15462	0.0291659	Serine/threonine kinase 26 (MST4); polarity/actin regulator in Golgi and stress signaling pathways.
Gm20754	-0.98317	0.0294033	Predicted gene Gm20754; uncharacterized transcript (likely noncoding) with neural expression.
Ndrg3	-0.492949	0.0297097	N-myc downstream-regulated gene 3; lactate-sensing signaling protein promoting hypoxia responses.
Sema6c	-0.909038	0.0297097	Semaphorin-6C; membrane guidance cue modulating axon pathfinding and dendritic development.
Rap1gap	-0.834852	0.0299249	RAP1 GTPase-activating protein; terminates Rap1 signaling to control adhesion and junctions.
Nbeal2	-1.01565	0.0303402	Neurobeachin-like 2; BEACH-domain protein required for secretory granule/platelet α-granule biogenesis.
Lypd1	-0.939029	0.0309739	Ly6/PLAUR domain–containing protein 1; GPI-anchored modulator of synaptic maturation and neurite outgrowth.
Nrgn	-0.892626	0.0310379	Neurogranin; postsynaptic calmodulin-binding protein tuning Ca²⁺/CaM signaling and LTP.
Arhgap20	-0.614759	0.0321256	Rho GTPase-activating protein 20; GAP for Rho family controlling actin dynamics and migration.
H2az2	-1.32051	0.0331086	Histone H2A.Z variant 2; chromatin variant marking regulatory regions and transcriptional plasticity.
Elmod1	-1.06545	0.0332857	ELMO domain–containing protein 1; ARF-family GAP required for hair-cell stereocilia and vesicle trafficking.
Dgkh	-0.836275	0.0332857	Diacylglycerol kinase eta; terminates DAG signaling and generates phosphatidic acid in neurons.
Panx2	-0.801396	0.0332857	Pannexin 2; large-pore membrane channel mediating ATP/ion flux in brain.
Slc9a2	-1.26831	0.0334923	Solute carrier family 9 member A2 (NHE2); Na⁺/H⁺ exchanger regulating epithelial/neuronal pH homeostasis.
Chn1os3	-1.03042	0.0334923	Chimerin 1 opposite strand 3; long noncoding RNA adjacent to Chn1, putative transcriptional regulator.
Zmynd10	-1.66095	0.0334923	Zinc finger MYND-type containing 10; dynein-arm assembly factor essential for motile cilia function.
Ctsf	-0.581354	0.0334923	Cathepsin F; lysosomal cysteine protease in protein turnover and antigen processing.
Synpr	-1.05387	0.0356299	Synaptoporin; synaptic vesicle membrane protein enriched in mossy fibers.
Hes6	-0.854707	0.035805	HES family bHLH transcription factor 6; proneural regulator antagonizing Notch/Hes1 to drive differentiation.
Cdk14	-0.720906	0.035805	Cyclin-dependent kinase 14 (PFTK1); Wnt-responsive CDK modulating cytoskeletal dynamics and cell cycle.
Ly6e	-0.952048	0.035805	Lymphocyte antigen 6 complex, locus E; GPI-anchored surface protein modulating immune and viral entry pathways.
Selenom	-1.08366	0.03585	Selenoprotein M; ER-localized antioxidant and calcium-binding protein protecting neurons from ER stress.
Ppp3r1	-0.757701	0.0360486	Protein phosphatase 3 regulatory subunit B, alpha; Ca²⁺-binding subunit contr. calcineurin phosphatase activity in synaptic plasticity.
Mas1	-0.782758	0.036825	MAS1 proto-oncogene; GPCR for angiotensin, promoting neuroprotection and anti-inflammatory signaling.
Slitrk2	-0.923371	0.0379018	SLIT and NTRK-like family member 2; synaptic adhesion molecule modulating excitatory synapse development.
Ecm2	-1.27867	0.0379167	Extracellular matrix protein 2; matrix component promoting osteogenesis and neuronal morphology.
Ebf4	-0.700789	0.0397328	Early B-cell factor 4; transcription factor specifying neuronal identity and axonal projection patterns.
Rpusd3	-1.04833	0.0402313	RNA pseudouridine synthase domain-containing protein 3; enzyme modifying RNA pseudouridylation in ribosomal and spliceosomal RNAs.
Asphd2	-0.556611	0.0404396	Aspartate beta-hydroxylase domain-containing 2; ER protein modifying EGF-like domains and influencing cell adhesion.
Cpeb1	-0.668015	0.0404446	Cytoplasmic polyadenylation element-binding protein 1; translational regulator controlling synaptic protein synthesis and memory.
Tbata	-1.03953	0.0404516	T cell receptor alpha chain BTB/POZ domain-associated protein; negative regulator of lymphocyte expansion, expressed in neurons.
Igfbp4	-1.09171	0.0418155	Insulin-like growth factor-binding protein 4; IGF modulator that regulates neuronal growth and vascular remodeling.
Brd9	-1.00057	0.0421755	Bromodomain-containing protein 9; ATP-independent chromatin regulator contributing to transcriptional control.
Ppic	-2.10886	0.0432449	Peptidyl-prolyl cis-trans isomerase C; mitochondrial folding enzyme assisting oxidative phosphorylation complexes.
Isoc1	-1.08248	0.0432449	Isochorismatase domain-containing protein 1; mitochondrial enzyme in amino acid and lipid metabolism.
Kcng2	-0.921934	0.0432449	Potassium voltage-gated channel subfamily G member 2; modulatory channel subunit shaping action potential firing.
Dap3	-0.618886	0.0433244	DAP3 (death-associated protein 3); mitochondrial ribosomal GTPase regulating apoptosis and translation.
B3galt2	-0.943614	0.044282	Beta-1,3-galactosyltransferase 2; glycosyltransferase involved in glycolipid and glycoprotein biosynthesis.
Bcan	-1.16081	0.0447052	Brevican core protein (BCAN); CNS extracellular matrix proteoglycan stabilizing perineuronal nets.
Aldh6a1	-0.861996	0.0450223	Aldehyde dehydrogenase 6A1; mitochondrial enzyme in valine and fatty-acid metabolism.
Ccn3	-1.13048	0.0451557	Cellular communication network factor 3 (NOV); matricellular signal regulating angiogenesis and differentiation.
Rasa1	-0.583228	0.0455692	RAS p21 protein activator 1; Ras GTPase-activating protein regulating cytoskeleton and axon guidance.
Sec23a	-0.684123	0.0462557	SEC23 homolog A; COPII vesicle coat protein essential for ER-to-Golgi transport.
Bambi	-1.14386	0.0463184	BMP-induced kinase inhibitor (Bambi); pseudoreceptor dampening TGF-β/BMP signaling in development.
Epdr1	-0.992431	0.0467541	Ependymin-related protein 1; secreted protein involved in neuronal repair and synaptic plasticity.
Faim	-0.638291	0.047019	Fas apoptotic inhibitory molecule; anti-apoptotic protein protecting neurons from Fas-mediated death.
Sidt1	-0.801976	0.0478221	SIDT1 transmembrane protein; RNA transport channel modulating microRNA uptake and intercellular signaling.
Cbx7	-0.716598	0.0489341	Chromobox protein CBX7; Polycomb repressor controlling stemness and neuronal differentiation.
Col19a1	-0.647515	0.049811	Collagen type XIX alpha 1 chain; basement-membrane ECM collagen enriched around inhibitory synapses.
Pea15a	-0.553954	0.049811	Phosphoprotein enriched in astrocytes 15A; cytoplasmic regulator of insulin signaling and astrocyte responses.
Pnmal1	-0.632865	0.049811	Paraneoplastic antigen-like 1; neuronal protein of unclear function, may modulate cellular stress responses.
Slc25a29	-0.96062	0.049811	Solute carrier family 25 member 29; mitochondrial ornithine transporter participating in amino-acid metabolism.
Abcd2	-0.993438	0.049811	ATP-binding cassette subfamily D member 2; peroxisomal fatty-acid transporter required for β-oxidation.
Glia
Gene symbol	logFC	FDR	Gene description
Upregulated
Serpina3n	4.46167	3.70747e-10	Serine (or cysteine) peptidase inhibitor, clade A member 3N; secreted serpin protease inhibitor active in inflammation and tissue injury.
Hmga1b	2.36108	1.88849e-09	High mobility group AT-hook 1B; chromatin architectural protein that modulates transcriptional responsiveness.
Lilr4b	5.01861	2.8035e-08	Leukocyte immunoglobulin-like receptor subfamily B member 4A; inhibitory immune receptor that dampens myeloid activation.
Clcf1	2.53266	6.78661e-08	Cardiotrophin-like cytokine factor 1; CNTF-family neurotrophic cytokine promoting survival and differentiation.
Rhoj	2.9849	5.85228e-07	Ras homolog family member J; Rho GTPase controlling actin remodeling, angiogenic sprouting, and endocytosis.
Ecm1	2.56271	7.14384e-07	Extracellular matrix protein 1; ECM organizer that regulates angiogenesis and epidermal integrity.
Parp12	1.21799	1.53797e-06	Poly(ADP-ribose) polymerase 12; mono-ADP-ribosyltransferase with antiviral roles in interferon responses.
Spp1	5.15926	1.66651e-06	Secreted phosphoprotein 1 (osteopontin); matricellular cytokine mediating adhesion, inflammation, and tissue remodeling.
Parp3	2.89115	2.81699e-06	Poly(ADP-ribose) polymerase 3; DNA damage–response enzyme promoting double-strand break repair.
Stat2	1.13783	2.81699e-06	Signal transducer and activator of transcription 2; key transcription factor for type-I interferon signaling.
Slc39a14	2.13586	3.72851e-06	Solute carrier family 39 member 14; divalent metal importer for manganese/zinc/iron homeostasis.
Sbno2	2.23638	8.20448e-06	Strawberry notch homolog 2; transcriptional co-regulator linked to NF-κB and IL-10 anti-inflammatory programs.
Socs3	3.62965	8.20448e-06	Suppressor of cytokine signaling 3; negative feedback inhibitor of JAK–STAT signaling.
S1pr3	3.3403	8.20448e-06	Sphingosine-1-phosphate receptor 3; GPCR controlling vascular tone, immunity, and neurite dynamics.
Il11	3.93732	1.50786e-05	Interleukin-11; pleiotropic cytokine regulating hematopoiesis, fibrosis, and epithelial repair.
Btc	3.46897	1.87764e-05	Betacellulin; EGF-family ligand activating ERBB signaling for growth and repair.
Has2	3.34802	2.78104e-05	Hyaluronan synthase 2; membrane enzyme producing high-molecular-weight hyaluronan in the ECM.
Cebpd	2.05531	3.27359e-05	CCAAT/enhancer-binding protein delta; acute-phase transcription factor in inflammation and stress.
Col16a1	2.67081	5.5608e-05	Collagen type XVI alpha 1 chain; FACIT collagen contributing to basement-membrane and ECM stability.
Itga5	3.2065	5.5608e-05	Integrin alpha-5; fibronectin receptor subunit mediating adhesion and mechanotransduction.
Dab2	2.36769	8.94293e-05	Disabled homolog 2; endocytic adaptor and TGF-β pathway modulator.
Il33	2.00739	8.94293e-05	Interleukin-33; alarmin cytokine activating type-2 immunity and glial responses.
Timp1	4.75185	8.94293e-05	Tissue inhibitor of metalloproteinases-1; MMP inhibitor controlling matrix turnover and cell survival.
Lilrb4a	4.10202	9.01385e-05	Leukocyte immunoglobulin-like receptor subfamily B member 4A; ITIM-bearing inhibitory receptor on myeloid cells.
Tm4sf1	4.35965	9.84234e-05	Transmembrane 4 L6 family member 1; tetraspanin-like scaffold regulating migration and angiogenesis.
AI506816	1.7652	9.84234e-05	AI506816 gene; predicted noncoding transcript with limited functional annotation.
Trib1	2.13687	0.000103799	Tribbles homolog 1; pseudokinase adaptor regulating MAPK/C-EBP signaling and lipid metabolism.
Fgl2	3.19912	0.00013883	Fibrinogen-like protein 2; immune effector with procoagulant and immunomodulatory activity.
Flnc	3.60345	0.00013883	Filamin-C; actin cross-linker maintaining cytoskeletal integrity and mechanosensing.
Gfap	2.0437	0.000163994	Glial fibrillary acidic protein; intermediate-filament protein and canonical marker of astrocytes.
Ccn1	2.15665	0.000295115	Cellular communication network factor 1; matricellular signaling protein that regulates angiogenesis and wound repair.
Tpbg	1.88361	0.000295115	Trophoblast glycoprotein; cell-surface glycoprotein enhancing motility and Wnt signaling.
Ch25h	5.23392	0.000295115	Cholesterol 25-hydroxylase; oxysterol-producing enzyme with antiviral and immune functions.
Peak1	1.52204	0.000301765	Pseudopodium-enriched atypical kinase 1; focal-adhesion scaffold coordinating RTK/integrin signals.
Tagln2	1.91536	0.000325776	Transgelin-2; actin-binding protein stabilizing the cortical cytoskeleton and migration.
Slc5a3	1.90155	0.000331114	Solute carrier family 5 member 3; sodium/myo-inositol cotransporter for osmolyte balance.
Tlr1	1.96886	0.000389291	Toll-like receptor 1; pattern-recognition receptor sensing bacterial lipopeptides.
Tnfrsf12a	2.65596	0.000489402	Tumor necrosis factor receptor superfamily member 12A; receptor for TWEAK driving remodeling and inflammation.
Ifit3	3.02283	0.000531414	Interferon-induced protein with tetratricopeptide repeats 3; antiviral effector binding viral RNA or protein complexes.
Mx1	3.42194	0.000649287	MX dynamin-like GTPase 1; interferon-induced antiviral restriction factor.
Mvp	1.60993	0.000696132	Major vault protein; ribonucleoprotein/transport scaffold involved in stress responses.
Bcl3	3.92447	0.000753655	B-cell lymphoma 3 protein; atypical IκB family co-activator/co-repressor for NF-κB.
Ier3	2.57209	0.000860633	Immediate early response 3; stress-response regulator of apoptosis and ERK signaling.
Amotl1	1.78816	0.000873761	Angiomotin-like 1; junctional scaffold modulating Hippo/YAP signaling and cell migration.
Gadd45g	2.71372	0.000874706	Growth arrest and DNA-damage-inducible protein G; stress sensor promoting cell-cycle arrest and DNA repair.
Srxn1	2.08687	0.00119988	Sulfiredoxin-1; thiol-repair enzyme reversing oxidized peroxiredoxins for antioxidant defense.
Cacng5	2.26151	0.00126244	Calcium voltage-gated channel auxiliary subunit gamma-5; VGCC modulator influencing neuronal excitability.
Odc1	1.81954	0.00126244	Ornithine decarboxylase 1; rate-limiting enzyme of polyamine biosynthesis.
Gpd1	1.92882	0.00126244	Glycerol-3-phosphate dehydrogenase 1; cytosolic redox enzyme in glycerolipid metabolism.
9030025P20Rik	1.57734	0.00126244	9030025P20Rik gene; predicted long noncoding transcript.
Hmox1	2.04802	0.00143016	Heme oxygenase 1; stress-induced enzyme degrading heme with cytoprotective and anti-inflammatory effects.
Adam8	3.2307	0.00167597	A disintegrin and metalloprotease 8; sheddase/adhesion molecule in leukocyte trafficking.
Ier5l	2.7024	0.00196413	Immediate early response 5-like; stress-induced factor modulating cell-cycle and heat-shock pathways.
Pmepa1	1.55534	0.001969	Prostate transmembrane protein, androgen-induced 1; stress-response regulator implicated in apoptosis and oxidative stress protection.
Ms4a6d	2.60794	0.0020721	Membrane-spanning 4-domains subfamily A member 6D; cell surface protein involved in immune cell signaling.
Msn	1.28055	0.0023151	Moesin; actin–membrane crosslinker maintaining cell cortex structure and motility.
Ahnak2	3.93235	0.0023935	AHNAK nucleoprotein 2; large scaffolding protein contributing to membrane repair and calcium signaling.
Smim3	1.39556	0.00260563	Small integral membrane protein 3; poorly characterized transmembrane protein implicated in apoptosis regulation.
Angptl2	2.14753	0.0027494	Angiopoietin-like protein 2; secreted factor promoting angiogenesis, inflammation, and metabolic remodeling.
Irf7	2.8194	0.0027494	Interferon regulatory factor 7; master transcriptional regulator of type I interferon–mediated antiviral responses.
Sdc1	1.83219	0.00279084	Syndecan-1; cell surface heparan sulfate proteoglycan controlling adhesion and growth factor signaling.
Vgf	2.88552	0.00285681	VGF nerve growth factor–inducible protein; secreted neuropeptide precursor modulating synaptic plasticity and metabolism.
Tgm2	2.6644	0.00297292	Transglutaminase 2; multifunctional enzyme crosslinking proteins in apoptosis and ECM stabilization.
Lif	3.55596	0.00300141	Leukemia inhibitory factor; pleiotropic cytokine involved in neural differentiation, inflammation, and tissue protection.
Anxa2	2.23378	0.00344186	Annexin A2; calcium-dependent phospholipid-binding protein regulating membrane organization and fibrinolysis.
Fn1	2.80845	0.00375935	Fibronectin 1; major extracellular matrix glycoprotein mediating adhesion, migration, and wound repair.
Aldh1l2	1.67113	0.00376112	Aldehyde dehydrogenase 1 family member L2; mitochondrial enzyme oxidizing fatty aldehydes to acids.
Trim47	2.29734	0.00377238	Tripartite motif-containing protein 47; ubiquitin ligase regulating ER stress and inflammation.
Ifit3b	2.68567	0.00387571	Interferon-induced protein with tetratricopeptide repeats 3B; antiviral effector participating in interferon response.
Slc14a1	1.47223	0.00436486	Solute carrier family 14 member 1; urea transporter maintaining osmotic balance.
Slc4a8	1.26539	0.00445414	Solute carrier family 4 member 8; electrogenic sodium bicarbonate transporter contributing to pH homeostasis.
Rnf213	1.40724	0.00473579	Ring finger protein 213; giant E3 ubiquitin ligase regulating angiogenesis and vascular stability.
Lrtm2	1.81797	0.00480126	Leucine-rich repeat transmembrane neuronal protein 2; postsynaptic adhesion molecule shaping synaptic connectivity.
Eef1e1	1.05357	0.00480171	Eukaryotic translation elongation factor 1 epsilon 1; component of the elongation factor complex promoting translation fidelity.
Myc	2.23792	0.00484415	MYC proto-oncogene protein; transcription factor driving cell cycle progression, metabolism, and growth.
Mrps6	1.61861	0.00515038	Mitochondrial ribosomal protein S6; structural component of the small mitochondrial ribosomal subunit.
Aspg	2.69403	0.00537123	Asparaginase homolog; enzyme participating in nitrogen metabolism and neuroprotection.
Fosl2	1.59925	0.00592171	FOS-like antigen 2; immediate-early transcription factor mediating AP-1–dependent gene regulation.
Inava	1.10562	0.00624583	Innate immunity activator; scaffold promoting NF-κB signaling downstream of Toll-like receptors.
Ccn2	1.7741	0.00730595	Cellular communication network factor 2; connective tissue growth factor controlling fibrosis and angiogenesis.
Tgfbi	1.82079	0.00736992	Transforming growth factor beta–induced protein; ECM component enhancing cell adhesion and differentiation.
Ndst1	1.57919	0.00741164	N-deacetylase/N-sulfotransferase 1; enzyme modifying heparan sulfate chains in ECM and signaling regulation.
Pfkfb4	1.35161	0.00758691	6-phosphofructo-2-kinase/fructose-2,6-bisphosphatase 4; glycolytic enzyme modulating fructose-2,6-bisphosphate levels.
Sphk1	3.88195	0.00770414	Sphingosine kinase 1; enzyme generating sphingosine-1-phosphate, a key signaling lipid in survival and inflammation.
Spry2	1.33336	0.00821291	Sprouty homolog 2; RTK pathway inhibitor modulating FGF and EGFR signaling.
Amz1	1.14949	0.00841115	Armadillo repeat–containing protein 1; protein involved in cytoskeletal organization and transcriptional regulation.
Hmga1	2.20404	0.00841115	High mobility group AT-hook 1; chromatin-binding architectural protein regulating transcriptional plasticity.
Gm5067	1.248	0.00848419	Predicted gene 5067; uncharacterized transcript.
Ermard	1.46525	0.00848419	ERMARD gene (endoplasmic reticulum membrane-associated RNA degradation); component of RNA quality-control system.
Il4ra	1.94503	0.00856448	Interleukin 4 receptor alpha chain; cytokine receptor mediating IL-4 and IL-13 signaling in immunity.
Fgfr4	2.57144	0.00856448	Fibroblast growth factor receptor 4; receptor tyrosine kinase modulating development and metabolism.
Cd14	1.99125	0.00922057	CD14 antigen; co-receptor for bacterial lipopolysaccharide on macrophages and monocytes.
Rasip1	2.46407	0.00961737	Ras interacting protein 1; endothelial signaling factor promoting vessel integrity and migration.
Snhg15	1.68917	0.0097248	Small nucleolar RNA host gene 15; long noncoding RNA involved in RNA processing and neuroplasticity.
Pgs1	1.30069	0.0101437	Phosphatidylglycerophosphate synthase 1; mitochondrial enzyme catalyzing cardiolipin precursor synthesis.
Rtp4	2.01693	0.0103668	Receptor transporter protein 4; chaperone facilitating G protein–coupled receptor trafficking to the cell surface.
Gbp7	1.72823	0.0105475	Guanylate-binding protein 7; interferon-inducible GTPase with antimicrobial and antiviral activity.
Lypla2	1.09365	0.0106477	Lysophospholipase 2; enzyme hydrolyzing lysophospholipids in membrane remodeling.
Hbegf	1.89648	0.0107856	Heparin-binding EGF-like growth factor; EGFR ligand promoting epithelial proliferation and wound healing.
Nptx2	2.89722	0.0108395	Neuronal pentraxin 2; secreted synaptic protein regulating AMPA receptor clustering.
Igtp	1.72696	0.0114402	Interferon gamma–induced GTPase; intracellular pathogen resistance protein disrupting vacuolar membranes.
Cd300lf	3.65944	0.0114402	CD300 antigen-like family member F; inhibitory receptor dampening myeloid activation.
Slfn2	2.90985	0.011716	Schlafen family member 2; regulator of myeloid differentiation and antiviral immunity.
Gm3448	2.23549	0.011716	Predicted gene 3448; uncharacterized noncoding transcript.
1700025G04Rik	0.713645	0.0123541	Predicted gene 1700025G04Rik; uncharacterized transcript.
Acat3	1.44725	0.0123541	Acetyl-CoA acetyltransferase 3; mitochondrial enzyme catalyzing acetoacetyl-CoA formation in ketone metabolism.
Tspan4	2.0946	0.0125377	Tetraspanin 4; membrane scaffold modulating adhesion and motility.
Camk2d	0.697137	0.0129935	Calcium/calmodulin-dependent protein kinase type II subunit delta; kinase mediating synaptic plasticity and memory.
Ms4a6c	2.8834	0.0130528	Membrane-spanning 4-domains subfamily A member 6C; immune cell surface protein involved in pathogen defense.
Ifi204	3.97281	0.0132774	Interferon-activated gene 204; DNA sensor activating the STING pathway during antiviral defense.
Junb	2.2161	0.0132774	Jun B proto-oncogene; immediate-early transcription factor regulating cell proliferation and stress responses.
Gadd45b	3.08568	0.0132774	Growth arrest and DNA-damage-inducible protein B; stress-inducible transcriptional regulator of survival pathways.
Inhba	2.82596	0.0132774	Inhibin beta A chain; TGF-β superfamily cytokine forming activin A, regulating differentiation and inflammation.
Tnc	2.17008	0.0140597	Tenascin C; large extracellular matrix glycoprotein regulating adhesion and tissue remodeling.
Zfp36	1.88986	0.0154394	Zinc finger protein 36; RNA-binding factor promoting mRNA decay of inflammatory transcripts.
Cdc14a	1.32971	0.0154577	Cell division cycle 14A; dual-specificity phosphatase controlling mitotic exit and DNA damage recovery.
2700038G22Rik	1.45747	0.0154577	Predicted gene 2700038G22Rik; uncharacterized transcript.
Bst2	2.43529	0.0154738	Bone marrow stromal antigen 2; antiviral restriction factor tethering virions to the cell membrane.
Bmp1	1.53068	0.0154738	Bone morphogenetic protein 1; secreted metalloprotease activating procollagens and growth factors.
Gm3435	1.83974	0.0154738	Predicted gene 3435; uncharacterized noncoding transcript.
Cd44	3.33544	0.0155825	CD44 antigen; hyaluronan receptor involved in adhesion, inflammation, and migration.
Heatr1	1.22371	0.0163727	HEAT repeat-containing protein 1; nuclear transport and RNA-processing factor.
Klk9	3.3898	0.0181097	Kallikrein-related peptidase 9; secreted serine protease of unknown physiological function.
Thbd	2.94332	0.0188708	Thrombomodulin; endothelial receptor that binds thrombin to activate protein C and inhibit coagulation.
Fos	2.76349	0.0188708	Proto-oncogene c-Fos; immediate-early transcription factor forming AP-1 complex in response to stimuli.
Ipo5	0.759889	0.0201886	Importin subunit beta-1; nuclear transport receptor mediating protein import.
Klk6	3.12514	0.021042	Kallikrein-related peptidase 6; secreted protease with roles in neurodegeneration and tissue remodeling.
Sema7a	1.30559	0.021042	Semaphorin 7A; GPI-anchored semaphorin regulating immune responses and axon guidance.
Mettl1	1.3818	0.0214635	Methyltransferase-like protein 1; tRNA methyltransferase important for translation fidelity.
Ptgs2	2.52906	0.0255498	Prostaglandin-endoperoxide synthase 2; inducible cyclooxygenase generating prostaglandins during inflammation.
Spred3	1.733	0.025793	Sprouty-related EVH1-domain-containing protein 3; modulator of FGF receptor signaling in neurons.
Ptx3	3.34478	0.0262371	Pentraxin 3; pattern-recognition molecule mediating innate immunity and inflammation.
Parp9	1.40703	0.0266206	Poly(ADP-ribose) polymerase family member 9; interferon-inducible mono-ADP-ribosyltransferase with antiviral function.
A930003O13Rik	1.37502	0.0266518	Predicted gene A930003O13Rik; uncharacterized noncoding RNA.
Sv2c	2.96687	0.0268465	Synaptic vesicle glycoprotein 2C; synaptic vesicle protein involved in neurotransmitter release.
Plin2	1.51093	0.0271066	Perilipin 2; lipid droplet–associated protein regulating fatty acid storage and mobilization.
Aen	1.26514	0.0271066	Apoptosis-enhancing nuclease; pro-apoptotic endonuclease fragmenting DNA during cell death.
Capg	2.47196	0.0277332	Capping actin protein, gelsolin-like; actin filament regulator controlling cytoskeletal dynamics.
Apobec1	1.44772	0.027883	Apolipoprotein B mRNA editing enzyme catalytic polypeptide 1; RNA cytidine deaminase generating C-to-U edits.
Tubb6	2.19614	0.0294781	Tubulin beta chain 6; microtubule component important for cytoskeletal structure.
Dhx37	1.13378	0.0295909	DEAH-box helicase 37; RNA helicase involved in ribosome biogenesis.
Hpgd	1.27057	0.0301004	15-hydroxyprostaglandin dehydrogenase; prostaglandin-inactivating enzyme regulating inflammation.
Ccl12	3.11409	0.0321477	C-C motif chemokine 12; monocyte chemoattractant in immune and inflammatory responses.
Stk40	1.2282	0.0324899	Serine/threonine kinase 40; modulator of MAPK signaling and stress responses.
Irgm1	1.73326	0.0324899	Immunity-related GTPase family M member 1; interferon-inducible protein mediating host defense.
Rpl3	1.20766	0.0325768	Ribosomal protein L3; structural component of the 60S ribosomal subunit.
Rbms1	0.865675	0.0341492	RNA-binding motif single-stranded interacting protein 1; post-transcriptional regulator of mRNA stability.
Pros1	1.43469	0.0344497	Protein S; vitamin K–dependent glycoprotein regulating anticoagulation and apoptosis.
Cebpb	1.54188	0.0353676	CCAAT/enhancer-binding protein beta; transcription factor mediating acute-phase and immune responses.
Col20a1	1.34558	0.0353676	Collagen type XX alpha 1 chain; extracellular matrix structural component in connective tissue.
Tnfrsf1a	1.31937	0.0353676	Tumor necrosis factor receptor superfamily member 1A; receptor mediating TNF-α–induced inflammation and apoptosis.
Ano6	0.889894	0.0353676	Anoctamin 6; calcium-activated chloride channel with roles in phospholipid scrambling and cell volume control.
Cdh22	2.34347	0.0354424	Cadherin 22; calcium-dependent adhesion molecule expressed in developing neurons.
Emp1	3.78812	0.0374566	Epithelial membrane protein 1; tetraspan-like protein modulating proliferation and differentiation.
Slc9a3r2	1.60168	0.0374566	Solute carrier family 9 member 3 regulator 2; scaffolding protein regulating ion exchange and polarity.
Add3	0.86059	0.0374566	Adducin 3; actin–spectrin cytoskeletal assembly protein controlling membrane stability.
Dph5	0.732231	0.0381309	Diphthamide biosynthesis protein 5; enzyme involved in post-translational modification of elongation factor 2.
Tor3a	0.995194	0.0383551	Torsin family 3 member A; ER/NE AAA+ ATPase chaperone.
Ccl2	3.53273	0.0387091	C-C motif chemokine 2; potent monocyte chemoattractant promoting inflammation.
Ms4a6b	1.70504	0.0394084	Membrane-spanning 4-domains subfamily A member 6B; immune cell surface protein.
Hspb1	3.75379	0.0399304	Heat shock protein beta-1; small chaperone protecting cells from stress and apoptosis.
Sqle	0.956964	0.0400904	Squalene epoxidase; rate-limiting enzyme of cholesterol biosynthesis.
Ddx60	1.61665	0.040258	DEAD-box helicase 60; interferon-induced RNA helicase antiviral protein.
Zfas1	1.50227	0.0407792	ZNFX1 antisense RNA 1; long noncoding RNA regulating antiviral gene expression.
Sertad1	1.5225	0.0413747	SERTA domain-containing protein 1; transcriptional co-activator controlling cell proliferation.
Tpm4	1.05096	0.0413761	Tropomyosin alpha-4 chain; actin-binding cytoskeletal protein maintaining filament stability.
Piezo2	1.749	0.0419851	Piezo-type mechanosensitive ion channel component 2; mechanotransduction channel sensing pressure and stretch.
Cgref1	1.48147	0.0424106	Cell growth regulator with EF-hand domain protein 1; adhesion-related protein controlling proliferation.
Nedd9	1.4595	0.0433743	Neural precursor cell expressed developmentally down-regulated protein 9; scaffolding protein in integrin signaling.
Arid5b	0.912502	0.0436179	AT-rich interaction domain-containing protein 5B; transcriptional regulator modulating inflammatory genes.
Trmt61a	1.3451	0.048292	tRNA methyltransferase 61A; enzyme methylating tRNA for stability.
Gcnt2	2.30263	0.0493945	Glucosaminyl (N-acetyl) transferase 2; glycosyltransferase modifying blood group and mucin glycans.
Downregulated
Sowaha	-1.93053	3.28928e-09	Secreted or membrane-associated Wnt signaling inhibitor homolog A; secreted protein implicated in cortical development.
Shroom2	-2.02035	6.13553e-09	Shroom family member 2; actin-binding scaffold directing epithelial polarity and cytoskeletal organization.
Pcx	-1.82795	6.58804e-09	Pyruvate carboxylase; mitochondrial enzyme catalyzing conversion of pyruvate to oxaloacetate in anaplerosis and gluconeogenesis.
Aspa	-1.70228	5.5608e-05	Aspartoacylase; enzyme hydrolyzing N-acetylaspartate in brain osmolyte and myelin metabolism.
Olfml1	-1.99593	8.50799e-05	Olfactomedin-like 1; extracellular matrix glycoprotein involved in adhesion and tissue morphogenesis.
Dscaml1	-1.26814	8.93954e-05	Down syndrome cell adhesion molecule-like 1; neuronal adhesion receptor guiding dendritic patterning and synaptic organization.
Gnai1	-1.63537	9.84234e-05	Guanine nucleotide-binding protein G subunit alpha 1; inhibitory G-protein alpha subunit regulating adenylyl cyclase activity.
Epn2	-1.49185	9.84234e-05	Epsin 2; endocytic adaptor promoting clathrin-mediated internalization and membrane curvature.
Ttll7	-1.30121	0.000112799	Tubulin tyrosine ligase-like family member 7; enzyme catalyzing microtubule polyglutamylation to modulate stability.
Grm3	-1.8787	0.000117671	Metabotropic glutamate receptor 3; G-protein-coupled receptor reducing synaptic glutamate release and modulating transmission.
Folh1	-2.01397	0.000161861	Folate hydrolase 1; membrane glutamate carboxypeptidase regulating glutamatergic neurotransmission.
Gm7901	-1.56802	0.000301765	Predicted gene 7901; uncharacterized noncoding transcript.
Septin7	-1.60013	0.000328847	Septin 7; cytoskeletal GTPase forming filaments for cytokinesis and membrane organization.
Tle2	-1.3262	0.000331114	Transducin-like enhancer protein 2; transcriptional corepressor interacting with Wnt and Notch signaling.
P2ry12	-2.24556	0.000725083	P2Y purinoceptor 12; Gi-coupled purinergic receptor mediating microglial chemotaxis and platelet aggregation.
Kctd4	-1.76578	0.00120525	Potassium channel tetramerization domain-containing protein 4; adaptor modulating ion channel assembly and neuronal signaling.
1500015L24Rik	-1.84139	0.00129238	Predicted gene 1500015L24Rik; noncoding RNA with enriched neural expression.
Gdpd2	-2.52143	0.00136545	Glycerophosphodiester phosphodiesterase domain-containing protein 2; enzyme in lysophospholipid metabolism.
Plekhb1	-1.5011	0.00143016	Pleckstrin homology domain-containing family B member 1; adaptor linking phospholipids to cytoskeletal rearrangements.
Trim59	-1.95311	0.00160014	Tripartite motif-containing protein 59; RING-type E3 ubiquitin ligase regulating innate immunity and proliferation.
Siglech	-1.97721	0.00166821	Sialic acid-binding Ig-like lectin H; inhibitory receptor on plasmacytoid dendritic cells modulating interferon responses.
Fam171b	-1.10963	0.00167597	Family with sequence similarity 171, member B; neuronal membrane glycoprotein implicated in synaptic function.
Ankub1	-2.05252	0.00167597	Ankyrin repeat and BTB domain-containing protein 1; potential transcriptional regulator in neural development.
Fn3k	-1.85121	0.00167597	Fructosamine-3-kinase; enzyme repairing glycated proteins and maintaining protein quality.
Map6d1	-1.38895	0.00167597	Microtubule-associated protein 6 domain-containing protein 1; stabilizer of neuronal microtubules.
Septin4	-1.42618	0.00167991	Septin 4; filament-forming GTPase regulating cytokinesis and synaptic vesicle dynamics.
Acsl1	-0.842458	0.00190593	Acyl-CoA synthetase long-chain family member 1; enzyme activating long-chain fatty acids for metabolism.
Cmtm5	-1.92035	0.00224778	CKLF-like MARVEL transmembrane domain-containing protein 5; transmembrane protein involved in myelination and vesicle trafficking.
Pls1	-1.39272	0.00229798	Plastin 1; actin-bundling protein controlling cytoskeletal architecture in sensory cells.
Traf4	-1.60552	0.00229822	TNF receptor-associated factor 4; adaptor modulating TNF and receptor tyrosine kinase signaling.
Hdac11	-1.29968	0.0023151	Histone deacetylase 11; enzyme removing acetyl groups from histones and nonhistone proteins to modulate transcription.
Csmd3	-0.830352	0.00236319	CUB and Sushi multiple domains 3; large membrane protein associated with neurite growth and synaptic maintenance.
Hapln1	-2.51925	0.00240867	Hyaluronan and proteoglycan link protein 1; extracellular stabilizer of hyaluronan–proteoglycan complexes in perineuronal nets.
Hhip	-1.89014	0.00246222	Hedgehog-interacting protein; membrane-bound antagonist of Hedgehog signaling regulating tissue patterning.
Clasp2	-1.1004	0.0026956	CLASP family microtubule-associated protein 2; microtubule plus-end tracking protein maintaining cytoskeletal organization.
Ptprd	-1.03494	0.00279084	Protein tyrosine phosphatase receptor type D; receptor phosphatase functioning as a synaptic organizer.
Crbn	-0.846927	0.00339374	Cereblon; substrate receptor of CRL4 ubiquitin ligase complex involved in synaptic plasticity and ion channel regulation.
Paqr7	-1.63087	0.00340447	Progestin and adipoQ receptor family member 7; membrane progesterone receptor influencing GPCR-like signaling.
1700066M21Rik	-1.45413	0.00379054	Predicted gene 1700066M21Rik; uncharacterized noncoding RNA enriched in neurons.
Mmp2	-1.72092	0.00385795	Matrix metallopeptidase 2; protease degrading extracellular matrix during tissue remodeling.
Abca8b	-1.00817	0.00387571	ATP-binding cassette subfamily A member 8B; lipid transporter involved in cholesterol and ceramide homeostasis.
Fam234a	-1.58114	0.00429406	Family with sequence similarity 234 member A; transmembrane protein implicated in erythroid cell differentiation.
Dixdc1	-1.22287	0.00445644	DIX domain-containing protein 1; scaffold for Wnt/β-catenin signaling and neurite outgrowth.
Pink1	-1.2466	0.00482123	PTEN-induced kinase 1; mitochondrial kinase regulating mitophagy and oxidative stress responses.
Rap1gap	-1.29858	0.00515038	Rap1 GTPase activating protein 1; inactivator of Rap1 controlling cell adhesion and junction stability.
Osbpl1a	-0.878115	0.0054028	Oxysterol-binding protein-like 1A; lipid transporter at ER–endosome contact sites.
Bcan	-1.83082	0.00584742	Brevican core protein; CNS-specific extracellular matrix proteoglycan shaping perineuronal nets.
Myorg	-1.82691	0.00677363	Myogenesis-regulating glycosidase; lysosomal glucanase maintaining astrocyte function and preventing brain calcification.
Selplg	-1.87115	0.00726245	P-selectin glycoprotein ligand 1; cell adhesion molecule mediating leukocyte rolling and trafficking.
Cygb	-1.65405	0.00741164	Cytoglobin; hexacoordinate globin protein facilitating oxygen transport and nitric oxide metabolism.
Slc48a1	-1.46278	0.00741164	Solute carrier family 48 member 1; heme transporter exporting lysosomal heme to cytosol.
Arhgef28	-0.977365	0.00803472	Rho guanine nucleotide exchange factor 28; activator of Rho GTPases involved in actin cytoskeletal rearrangement.
Olig1	-1.50819	0.00821291	Oligodendrocyte transcription factor 1; transcription factor promoting oligodendrocyte differentiation and myelination.
Plin3	-1.75982	0.00841115	Perilipin 3; lipid droplet–associated protein regulating lipolysis and lipid storage.
A930017K11Rik	-2.36916	0.00849882	Predicted gene A930017K11Rik; uncharacterized noncoding RNA.
Btbd17	-2.04517	0.00872786	BTB domain-containing protein 17; putative transcriptional regulator with neural expression.
Atl1	-0.867625	0.00893836	Atlastin GTPase 1; dynamin-like GTPase mediating endoplasmic reticulum network fusion.
Asrgl1	-1.12679	0.00906922	Asparaginase-like 1; isoaspartyl peptidase/asparaginase involved in protein repair.
Chn1	-1.5546	0.00917921	Chimerin 1; Rac GTPase-activating protein controlling axon guidance and spine morphology.
Adi1	-1.36455	0.00946125	Acireductone dioxygenase 1; metal-dependent enzyme in the methionine salvage pathway.
Mbp	-1.10383	0.0095171	Myelin basic protein; structural component of myelin essential for CNS insulation.
Pik3ip1	-1.37608	0.00973432	Phosphoinositide-3-kinase-interacting protein 1; transmembrane inhibitor of PI3K signaling.
Ndrg2	-1.56164	0.00973432	N-myc downstream regulated gene 2; stress-responsive cytoplasmic protein promoting glial differentiation.
Megf10	-1.16472	0.00973432	Multiple EGF-like-domains protein 10; phagocytic receptor mediating synapse and apoptotic cell clearance.
Slc2a5	-2.26139	0.0100381	Solute carrier family 2 member 5; fructose transporter involved in dietary sugar absorption and neural metabolism.
Capn5	-1.14903	0.0101554	Calpain-5; calcium-activated cysteine protease regulating cytoskeletal remodeling.
Gpr17	-1.79386	0.0107856	G protein-coupled receptor 17; receptor for uracil nucleotides and cysteinyl leukotrienes regulating oligodendrocyte maturation.
1700047M11Rik	-1.6614	0.0108395	Predicted gene 1700047M11Rik; uncharacterized noncoding transcript.
Ldhb	-1.14168	0.0108395	L-lactate dehydrogenase B chain; enzyme in oxidative metabolism catalyzing lactate–pyruvate interconversion.
Gab1	-1.00123	0.0108395	GRB2-associated binding protein 1; adaptor integrating receptor tyrosine kinase signaling to PI3K and MAPK pathways.
Qdpr	-1.23801	0.0116927	Quinoid dihydropteridine reductase; enzyme regenerating tetrahydrobiopterin for amino acid hydroxylation.
Rapgef3	-1.23808	0.0116927	Rap guanine nucleotide exchange factor 3; cAMP-regulated GEF activating Rap1 and Rap2.
Eps15	-1.00998	0.0119289	Epidermal growth factor receptor substrate 15; endocytic adaptor in clathrin-coated vesicle formation.
A230001M10Rik	-1.69166	0.0126245	Predicted gene A230001M10Rik; uncharacterized noncoding transcript.
Slc7a10	-1.55685	0.0129935	Solute carrier family 7 member 10; neutral amino acid transporter of neurons and astrocytes.
Abca9	-1.80412	0.0130528	ATP-binding cassette subfamily A member 9; lipid transporter expressed in macrophages and endothelium.
C030029H02Rik	-1.30434	0.0132774	Predicted gene C030029H02Rik; uncharacterized noncoding transcript.
Cdh10	-0.800045	0.0133606	Cadherin 10; classical calcium-dependent adhesion protein involved in synaptic specificity.
Rasl12	-1.15653	0.0138886	RAS-like family 12; small GTPase implicated in differentiation and energy metabolism.
Rab40c	-0.996392	0.0140597	Ras-related protein Rab-40C; SOCS box–containing GTPase controlling ubiquitin-mediated vesicle trafficking.
Armh4	-1.30264	0.0143743	Armadillo repeat-containing protein 4; scaffold protein with potential immune and cytoskeletal roles.
Pdk2	-0.988472	0.0144125	Pyruvate dehydrogenase kinase isoform 2; mitochondrial kinase inhibiting PDH complex and shifting metabolism toward glycolysis.
Bin1	-1.17938	0.0144125	Bridging integrator 1; BAR-domain protein shaping membranes during endocytosis and T-tubule formation.
Ivd	-1.18695	0.0145206	Isovaleryl-CoA dehydrogenase; enzyme catalyzing leucine catabolism.
Cspg4	-1.3102	0.0145206	Chondroitin sulfate proteoglycan 4; transmembrane proteoglycan regulating oligodendrocyte progenitor proliferation.
Myo6	-1.04623	0.0145206	Myosin VI; actin-based motor protein functioning in endocytosis and hair cell stereocilia.
Slc27a1	-1.48808	0.014645	Solute carrier family 27 member 1; fatty acid transport protein activating long-chain fatty acids.
Tsc22d3	-1.62258	0.0146518	TSC22 domain family protein 3; glucocorticoid-induced leucine zipper protein mediating anti-inflammatory effects.
Efs	-1.32452	0.0150894	Embryonal Fyn-associated substrate; focal adhesion adaptor linking integrins and Src signaling.
Tmcc2	-1.14856	0.0155825	Transmembrane and coiled-coil domain-containing protein 2; ER-associated protein regulating trafficking and morphology.
Mycl	-1.64943	0.0165082	MYC-like protein; transcription factor controlling cell proliferation and metabolism.
Car14	-1.84126	0.0170033	Carbonic anhydrase 14; membrane enzyme catalyzing reversible hydration of CO₂.
Pacsin3	-1.26086	0.0175583	Protein kinase C and casein kinase substrate in neurons protein 3; F-BAR membrane curvature protein regulating endocytosis.
Aifm3	-2.13809	0.017573	Apoptosis-inducing factor mitochondrion-associated 3; oxidoreductase involved in apoptosis and respiratory control.
Mturn	-1.21411	0.0181097	Microtubule-associated protein of unknown function Mturn; cytoskeletal protein promoting neurite extension.
Mapt	-1.00995	0.0183673	Microtubule-associated protein tau; axonal stabilizer of microtubules implicated in neurodegenerative disorders.
Gpr155	-0.948283	0.0188708	G protein-coupled receptor 155; orphan receptor with roles in neural trafficking and signaling.
Dennd5a	-0.989655	0.0190347	DENN domain-containing protein 5A; Rab GTPase activator mediating vesicle transport.
Cyp27a1	-1.58536	0.0204916	Cytochrome P450 family 27 subfamily A member 1; mitochondrial enzyme hydroxylating sterols in bile acid synthesis.
Gjc3	-1.49468	0.021042	Gap junction gamma-3 protein; connexin forming intercellular channels in brain and vasculature.
Amer2	-1.16627	0.021042	APC membrane recruitment protein 2; regulator of Wnt signaling at the plasma membrane.
Macrod1	-1.17072	0.021042	MACRO domain-containing protein 1; mono-ADP-ribosyl hydrolase regulating chromatin and gene expression.
Amotl2	-1.22241	0.0217172	Angiomotin-like protein 2; polarity and migration scaffold controlling Hippo pathway signaling.
Cbx7	-1.23351	0.0227277	Chromobox protein homolog 7; Polycomb repressor complex component maintaining gene silencing.
Csrp1	-1.24376	0.0243008	Cysteine and glycine-rich protein 1; LIM-domain adaptor modulating actin cytoskeleton and transcription.
Ccp110	-1.41708	0.0243008	Centriolar coiled-coil protein of 110 kDa; centrosomal protein regulating cilia formation and cell cycle.
Ghitm	-0.716594	0.0243008	Growth hormone-inducible transmembrane protein; mitochondrial inner-membrane component influencing apoptosis.
Myh14	-1.53267	0.025793	Myosin heavy chain 14; nonmuscle myosin involved in cell contractility and trafficking.
Caskin2	-1.30445	0.025793	CASK-interacting protein 2; postsynaptic scaffold coupling tyrosine kinases and actin cytoskeleton.
Enpp2	-1.18861	0.0259302	Ectonucleotide pyrophosphatase/phosphodiesterase 2; autotaxin enzyme producing lysophosphatidic acid.
Cnp	-1.36255	0.0260932	2′,3′-cyclic nucleotide 3′-phosphodiesterase; enzyme crucial for myelin biogenesis and stability.
Hpca	-1.73031	0.0262371	Hippocalcin; neuronal calcium sensor regulating synaptic plasticity and vesicle trafficking.
Sh3gl3	-0.963788	0.0262371	Endophilin-A3; BAR-domain endocytic protein controlling synaptic vesicle recycling.
Nrgn	-1.35743	0.0262371	Neurogranin; calmodulin-binding postsynaptic protein modulating calcium signaling and long-term potentiation.
Omg	-1.79522	0.0262371	Oligodendrocyte myelin glycoprotein; membrane inhibitor of neurite outgrowth involved in axon–glia signaling.
Abca8a	-1.1472	0.0262371	ATP-binding cassette subfamily A member 8A; lipid transporter expressed in glia and endothelium.
Ctsf	-1.09596	0.0262371	Cathepsin F; lysosomal cysteine protease involved in protein turnover.
Nwd1	-1.72668	0.0271066	NACHT and WD repeat domain-containing protein 1; signaling factor implicated in androgen receptor and immune pathways.
Adamts20	-0.983147	0.0271066	A disintegrin and metalloproteinase with thrombospondin motifs 20; EC protease in melanocyte development and ECM remodeling.
Kctd13	-1.0131	0.0273221	Potassium channel tetramerization domain-containing protein 13; adaptor influencing RhoA signaling and neurodevelopment.
Idh1	-0.660603	0.0278778	Isocitrate dehydrogenase 1; cytosolic NADP-dependent enzyme generating NADPH for redox balance.
Chn2	-1.21019	0.0294781	Chimerin 2; Rac GTPase-activating protein modulating axon guidance and synaptic function.
Cyth1	-1.22236	0.0295953	Cytosolic protein CYTH1; ARF guanine nucleotide exchange factor regulating endocytosis and actin remodeling.
Appl2	-1.52854	0.0296444	Adaptor protein phosphotyrosine interaction domain-containing 2; endosomal adaptor linking receptors to Akt signaling.
Tppp3	-1.52812	0.0303389	Tubulin polymerization-promoting protein family member 3; microtubule-organizing factor maintaining cytoskeletal stability.
Ypel2	-1.21445	0.030715	Yippee-like protein 2; small coiled-coil factor promoting neurite formation and cell growth.
Lhx1	-1.49845	0.0317031	LIM homeobox protein 1; transcription factor regulating neuronal specification and organogenesis.
Dnajc6	-0.965372	0.0325768	DnaJ homolog subfamily C member 6; auxilin co-chaperone required for synaptic vesicle uncoating.
Phgdh	-1.3519	0.0334917	Phosphoglycerate dehydrogenase; enzyme initiating de novo serine biosynthesis.
Grhpr	-1.20753	0.0334917	Glyoxylate reductase/hydroxypyruvate reductase; enzyme of glyoxylate and hydroxypyruvate metabolism.
Abtb2	-0.999102	0.0354424	Ankyrin repeat and BTB domain-containing protein 2; putative transcriptional regulator.
Etv4	-1.407	0.0354424	ETS variant transcription factor 4; ETS-domain transcription factor mediating receptor tyrosine kinase responses.
Trim13	-1.07402	0.0354424	Tripartite motif-containing protein 13; E3 ubiquitin ligase involved in ER stress and apoptosis.
Secisbp2l	-0.907661	0.0359806	SECIS binding protein 2-like; selenocysteine insertion factor-like protein regulating antioxidant gene expression.
Mpp2	-1.03784	0.0361065	Membrane-associated guanylate kinase MPP2; synaptic scaffold maintaining postsynaptic density organization.
Slc25a27	-1.10099	0.0361688	Mitochondrial carrier protein 27 (UCP4); uncoupling protein modulating neuronal energy metabolism.
Jade1	-0.908097	0.0362799	Jade family PHD finger protein 1; chromatin factor regulating histone acetylation and transcription.
Slu7	-0.78944	0.0369597	Pre-mRNA-splicing factor SLU7; spliceosomal protein required for mRNA processing.
Psd2	-1.11761	0.0369597	Phosphatidylserine decarboxylase 2 homolog; enzyme implicated in vesicle lipid remodeling.
Sort1	-1.20232	0.0369941	Sortilin 1; sorting receptor regulating lipoprotein trafficking and neurite growth.
Wipi1	-0.779679	0.0374566	WD repeat domain phosphoinositide-interacting protein 1; phosphoinositide effector required for autophagy initiation.
Prr18	-1.12029	0.0374566	Proline-rich protein 18; nuclear protein potentially involved in transcriptional regulation.
Prrg1	-1.38411	0.0374566	Proline-rich gamma-carboxyglutamic acid protein 1; transmembrane protein influencing neurite extension.
Ttll3	-1.04819	0.0374843	Tubulin tyrosine ligase-like family member 3; microtubule glycine ligase mediating post-translational modification.
Pigz	-1.42512	0.0374843	Phosphatidylinositol glycan anchor biosynthesis class Z protein; GPI anchor glycosyltransferase.
Rlbp1	-1.45073	0.0378627	Cellular retinaldehyde-binding protein; visual-cycle protein in Müller glia regenerating retinaldehyde.
Lims2	-1.21685	0.0381309	LIM and SH3 domain protein 2; cytoskeletal adaptor connecting integrins to actin.
Pde8a	-0.872178	0.0387091	Cyclic nucleotide phosphodiesterase 8A; cAMP-specific enzyme controlling compartmentalized signaling.
Cntn1	-0.970238	0.0387091	Contactin 1; GPI-anchored neuronal adhesion molecule guiding axon growth and myelination.
Jph1	-1.06749	0.0390703	Junctophilin 1; membrane-bridging protein coupling plasma membrane and endoplasmic reticulum.
Selenop	-1.55007	0.0390703	Selenoprotein P; extracellular selenium transport protein supplying selenium to brain and tissues.
Cdc42se2	-0.862594	0.0393355	CDC42 small effector protein 2; regulator of actin organization and immune signaling.
Nkd1	-1.07234	0.0413761	Naked cuticle homolog 1; Wnt antagonist binding Dishevelled to inhibit β-catenin signaling.
Ncam1	-0.868342	0.0423292	Neural cell adhesion molecule 1; adhesion molecule mediating neuron–neuron interaction and plasticity.
Nadk2	-0.668033	0.0423727	NAD kinase 2; mitochondrial enzyme generating NADP for anabolic metabolism.
Rftn1	-1.06743	0.0423727	Raftlin lipid raft linker 1; membrane raft protein modulating B-cell receptor signaling.
Tyro3	-1.28481	0.042485	TYRO3 protein tyrosine kinase; receptor promoting cell survival, myelination, and phagocytosis.
Gpsm2	-0.81392	0.0433036	G-protein signaling modulator 2; regulator of planar cell polarity and auditory hair cell orientation.
Phlpp1	-0.968476	0.0433743	PH domain leucine-rich repeat phosphatase 1; phosphatase that dephosphorylates Akt to control cell growth.
Sgk2	-0.951306	0.0433743	Serum/glucocorticoid-regulated kinase 2; kinase regulating ion channels and energy metabolism.
Apbb1	-0.932255	0.0433743	Amyloid beta precursor protein-binding family B member 1; adaptor linking amyloid precursor protein to transcriptional complexes.
Evi2a	-1.44523	0.0436179	Ecotropic viral integration site 2A; lysosomal tetraspanin-like protein involved in immune cell signaling.
Pygb	-0.932502	0.0441779	Brain glycogen phosphorylase; enzyme mobilizing glycogen stores for energy metabolism.
Psat1	-1.10041	0.044873	Phosphoserine aminotransferase 1; enzyme catalyzing conversion of 3-phosphohydroxypyruvate to phosphoserine.
Sspo	-1.55071	0.0450396	Subcommissural organ-spondin; secreted glycoprotein forming Reissner’s fiber and maintaining cerebrospinal flow.
Gstm1	-1.55585	0.0457721	Glutathione S-transferase mu 1; detoxification enzyme conjugating electrophiles with glutathione.
Abca6	-1.26998	0.0474261	ATP-binding cassette subfamily A member 6; lipid transporter in macrophages and liver.
Ntsr2	-1.92161	0.048292	Neurotensin receptor type 2; G-protein-coupled receptor mediating neuropeptide-induced signaling and pain modulation.
